# Supplementary material
Source: publisher figshare collection journal article supplement (https://acs.figshare.com/ndownloader/files/22616261)

# Supporting Information

## A Chemical Equivalent of Arene Monooxygenases: Dearomative Synthesis of Arene Oxides and Oxepines

Zohaib Siddiqi, William C. Wertjes, and David Sarlah\*

Roger Adams Laboratory, Department of Chemistry, University of Illinois, Urbana, Illinois 61801,  
United States

*\*e-mail: sarlah@illinois.edu*

### TABLE OF CONTENTS

|                                                                                      |            |
|--------------------------------------------------------------------------------------|------------|
| <b>1. General Experimental</b>                                                       | <b>S2</b>  |
| <b>2. Experimental Set-up</b>                                                        | <b>S3</b>  |
| 2-1. LED light source                                                                | S3         |
| 2-2. Set-up for small scale reactions (up to 2.0 mmol scale)                         | S4         |
| 2-3. Set-up for large scale reactions (up to 10 mmol scale)                          | S4         |
| <b>3. Experimental Procedures</b>                                                    | <b>S5</b>  |
| 3-1. Table S1: Optimization of arenophile-mediated epoxidation of benzene            | S5         |
| 3-2. Table S2: Optimization of arenophile-mediated epoxidation of naphthalene        | S6         |
| 3-3. Table S3: Optimization of cycloreversion to arene-oxides                        | S7         |
| 3-4. Table S4: Optimization of cycloreversion to benzoxepine                         | S7         |
| 3-5. Dearomative epoxidation of monocyclic arenes                                    | S8         |
| 3-5.1 General procedure for dearomative epoxidation with arenes                      | S8         |
| 3-5.2 General procedure for the synthesis of arene-oxides/oxepines                   | S11        |
| 3-6. Dearomative epoxidation of polycyclic arenes                                    | S14        |
| 3-6.1 General procedure for dearomative epoxidation with polycyclic arenes at -20 °C | S14        |
| 3-6.2 General procedure for dearomative epoxidation with polycyclic arenes at -78 °C | S14        |
| 3-6.3 General procedure for the cycloreversion to benzoxepines                       | S25        |
| 3-7. Derivatization                                                                  | S34        |
| 3-8. Large-scale procedures                                                          | S40        |
| <b>4. Crystallographic Data</b>                                                      | <b>S41</b> |
| <b>5. References</b>                                                                 | <b>S46</b> |
| <b>6. <sup>1</sup>H, <sup>13</sup>C, and <sup>19</sup>F NMR Spectra</b>              | <b>S47</b> |

## 1. General Experimental

Unless otherwise noted, all reactions were carried out under inert atmosphere. *N*-Methyl-1,2,4-triazoline-3,5-dione (MTAD) was prepared according to the literature procedure, sublimed, and stored in a  $-40\text{ }^{\circ}\text{C}$  freezer.<sup>1</sup>  $\text{Mn}(\text{ClO}_4)_2 \cdot 6\text{H}_2\text{O}$  and picolinic acid were purchased from Acros Organics. Peracetic Acid (32wt% in dilute acetic acid) was purchased from Sigma Aldrich. Acetonitrile and propionitrile were stored over 4 Å molecular sieves. Nickel oxide,<sup>2</sup> peracetic acid (8-10% in acetic acid),<sup>3</sup> hydroxycarbonimidic dibromide,<sup>4</sup> and 2-methylquinolin-4-yl pivalate,<sup>5</sup> were synthesized according to literature procedures. All other chemicals were purchased from commercial vendors and used without further purification.

Analytical thin-layer chromatography was performed on Merck silica gel 60 F<sub>254</sub> glass plates. Visualization was accomplished with UV light and/or potassium permanganate ( $\text{KMnO}_4$ ). Retention factor ( $R_f$ ) values reported were measured using a  $5 \times 2\text{ cm}$  TLC plate in a developing chamber containing the solvent system described. Flash column chromatography was performed using Silicycle SiliaFlash® P60 ( $\text{SiO}_2$ , 40-63  $\mu\text{m}$  particle size, 230-400 mesh).

$^1\text{H}$  and  $^{13}\text{C}$  NMR spectra were recorded on Varian Unity 500 (500 MHz,  $^1\text{H}$ ; 126 MHz,  $^{13}\text{C}$ ) MHz or Bruker 500 (500 MHz,  $^1\text{H}$ ; 126 MHz,  $^{13}\text{C}$ ) spectrometers. Spectra are referenced to residual chloroform ( $\delta = 7.26\text{ ppm}$ ,  $^1\text{H}$ ; 77.16 ppm,  $^{13}\text{C}$ ) or residual methanol ( $\delta = 3.31\text{ ppm}$ ,  $^1\text{H}$ ; 49.0 ppm,  $^{13}\text{C}$ ). Chemical shifts are reported in parts per million (ppm). Multiplicities are indicated by s (singlet), d (doublet), t (triplet), q (quartet), and m (multiplet). Coupling constants  $J$  are reported in Hertz (Hz).

Mass spectrometry (MS) was performed by the University of Illinois Mass Spectrometry Laboratory. Electron Impact ( $\text{EI}^+$ ) spectra were performed at 70 eV using methane as the carrier gas, with time-of-flight (TOF) mass analyzer. Chemical Ionization ( $\text{CI}^+$ ) spectra were performed with methane reagent gas, with either a double focusing sector field (DFSF) or time-of-flight (TOF) mass analyzer. Electrospray Ionization ( $\text{ESI}^+$ ) spectra were performed using a time-of-flight (TOF) mass analyzer. Data are reported in the form of  $m/z$  (intensity relative to the base peak = 100).

Infrared spectra were measured neat on a Perkin-Elmer spectrum BX FT-IR spectrometer. Peaks are reported in  $\text{cm}^{-1}$  with indicated relative intensities: s (strong, 0–33% T); m (medium, 34–66% T), w (weak, 67–100% T), and br (broad).

Visible-light spectrum of LED was recorder using Avantes Sensline Avaspec-ULS TEC Spectrometer.

Melting points were measured on a Buchi B-540 meting point apparatus and are uncorrected.

## 2. Experimental Set-up

### 2-1. LED light source

Generic cool white light LED corn bulbs were used for the photochemical experiments. These can be obtained from several manufactures over amazon.com and proved to give consistent results as well as identical visible spectra. Detailed info:

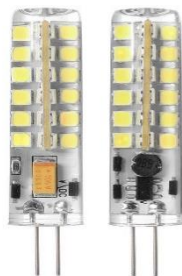

Socket: G4  
LED Chip: 48 LEDs SMD 2835  
Consume wattage: 4W  
Input voltage: AC / DC 12V  
Beam degree: 360 degrees  
Color temperature: 6500K (Cool White)  
Initial Lumens (lm): 290

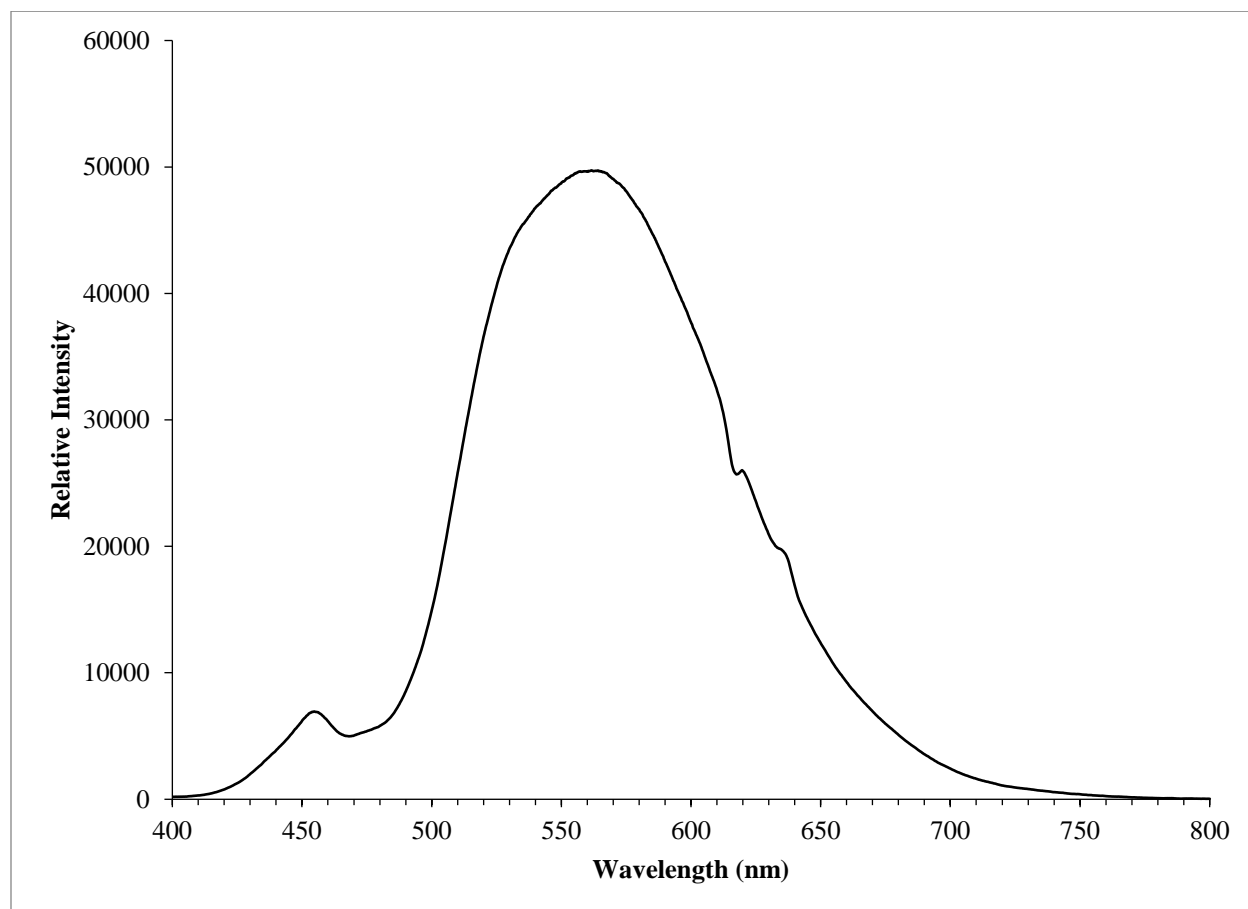

**Spectra S1.** Spectrum of a LED bulb used.

### 2-2. Set-up for small scale reactions (<2.0 mmol scale)

Six 4 W LED corn bulbs (12V, cool white light 6500K) were wired to a suitable 12V power supply, then sealed into test tubes and capped with septa (Picture S1). Lights and reaction tubes were arranged in a merry-go-round fashion for maximal exposure of each reaction vessel to light source and submerged in a  $-78\text{ }^{\circ}\text{C}$  bath. Generally, up to four 1.0 mmol scale reactions can be run in the same bath using five 4 W lamps positioned around them.

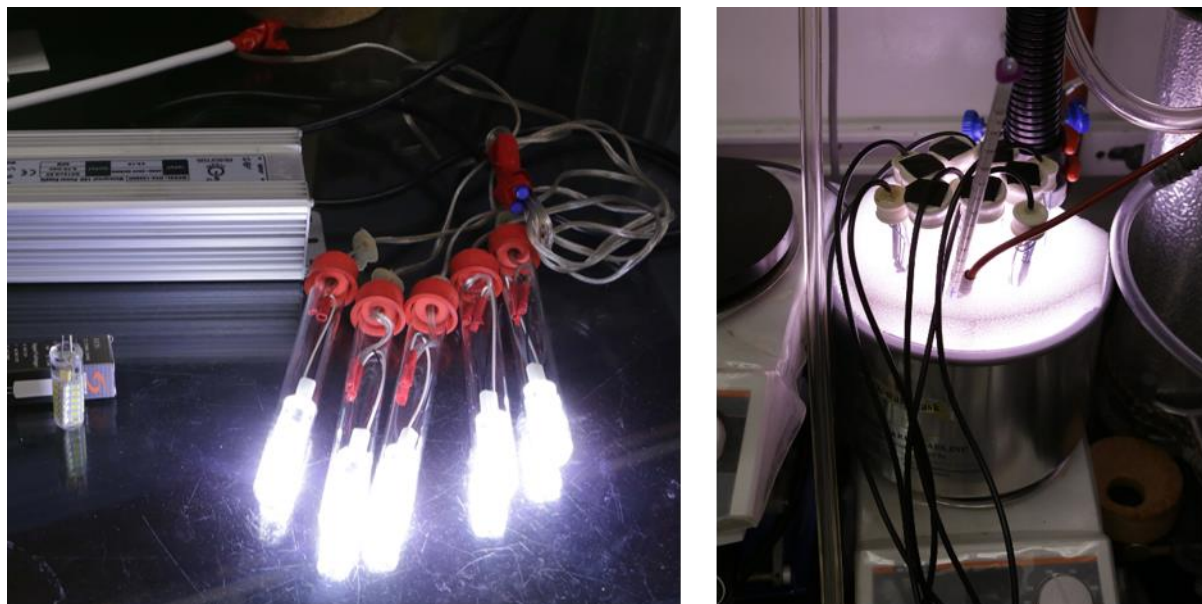

**Picture S1.** Assembly of LED bulbs for small-scale photochemical reactions.

### 2-3. Set-up for large scale reactions (2 - 25 mmol scale)

Eight 4 W LED corn bulbs (12V, cool white light 6500K) were wired to a suitable 12V power supply, then sealed into test tubes and capped with septa (see Picture S1). Lights were arranged in a merry-go-round fashion around a 250 mL clear borosilicate glass bottle (Picture S2). A normal reagent or media bottle can be used. The whole set-up was kept submerged in a cold bath during the photochemical reaction.

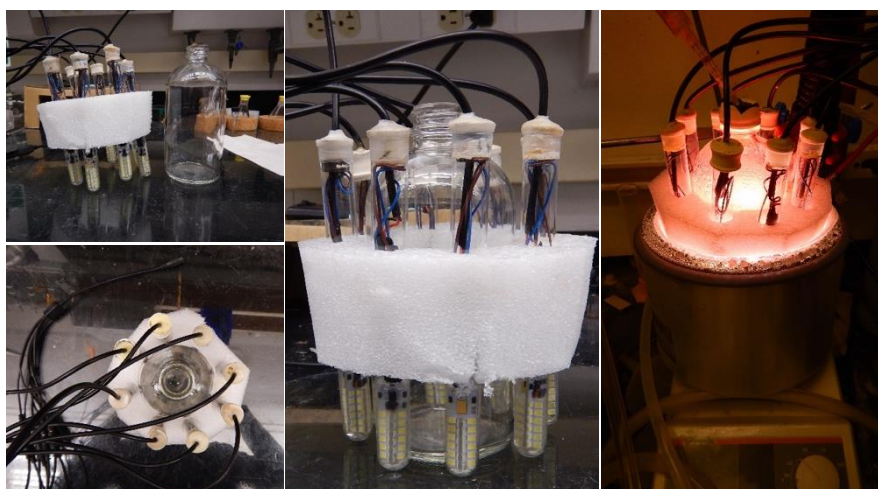

**Picture S2.** Photochemical set-up for large scale reactions.

### 3. Experimental Procedures

3-1. Table S1: Optimization of arenophile-mediated epoxidation of benzene.

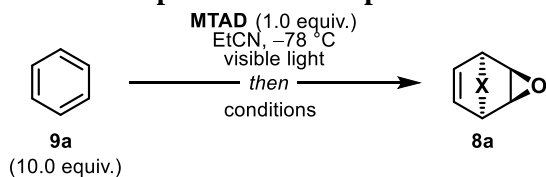

| Entry | [Mn] (mol%)                                   | Ligand (mol%)  | Oxidant                                                                      | Temp. (°C) | Time (h) | Yield          |
|-------|-----------------------------------------------|----------------|------------------------------------------------------------------------------|------------|----------|----------------|
| 1     | NA                                            | NA             | DMDO                                                                         | -50 to rt  | 3        | N.R.           |
| 2     | NA                                            | NA             | mCPBA                                                                        | -78 to rt  | 3        | N.R.           |
| 3     | Mn(ClO <sub>4</sub> ) <sub>2</sub> (20 mol%)  | <b>2</b> (100) | CH <sub>3</sub> CO <sub>3</sub> H (6.0 equiv.)                               | -78        | 2        | 6%             |
| 4     | Mn(ClO <sub>4</sub> ) <sub>2</sub> (20 mol%)  | <b>2</b> (100) | CH <sub>3</sub> CO <sub>3</sub> H (1.0 equiv.)                               | -78        | 2        | N.R.           |
| 5     | Mn(ClO <sub>4</sub> ) <sub>2</sub> (20 mol%)  | <b>2</b> (100) | CH <sub>3</sub> CO <sub>3</sub> H (1.0 equiv.)                               | -78 to rt  | 2        | 18% (3:1 d.r.) |
| 6     | Mn(ClO <sub>4</sub> ) <sub>2</sub> (20 mol%)  | <b>5</b> (40)  | CH <sub>3</sub> CO <sub>3</sub> H (2.0 equiv.)                               | -78        | 2        | 20% (4:1 d.r.) |
| 7     | Mn(ClO <sub>4</sub> ) <sub>2</sub> (20 mol%)  | <b>4</b> (40)  | CH <sub>3</sub> CO <sub>3</sub> H (2.0 equiv.)                               | -78        | 2        | 23% (3:1 d.r.) |
| 8     | Mn(ClO <sub>4</sub> ) <sub>2</sub> (20 mol%)  | <b>5</b> (40)  | CH <sub>3</sub> CO <sub>3</sub> H (6.0 equiv.)                               | -78        | 2        | 25% (3:1 d.r.) |
| 9     | Mn(ClO <sub>4</sub> ) <sub>2</sub> (5 mol%)   | <b>5</b> (10)  | CH <sub>3</sub> CO <sub>3</sub> H (6.0 equiv.)                               | -78        | 2        | 25% (3:1 d.r.) |
| 10    | Mn(ClO <sub>4</sub> ) <sub>2</sub> (5 mol%)   | <b>5</b> (10)  | CH <sub>3</sub> CO <sub>3</sub> H (12.0 equiv.)                              | -78        | 2        | N.R.           |
| 11    | Mn(ClO <sub>4</sub> ) <sub>2</sub> (25 mol%)  | <b>5</b> (50)  | CH <sub>3</sub> CO <sub>3</sub> H <sup>a</sup> (3.0 equiv.)                  | -78        | 2        | 45% (3:1 d.r.) |
| 12    | Mn(ClO <sub>4</sub> ) <sub>2</sub> (20 mol%)  | <b>5</b> (40)  | CH <sub>3</sub> CO <sub>3</sub> H <sup>a</sup> (3.0 equiv.)<br>slow addition | -78        | 2        | 30% (4:1 d.r.) |
| 13    | Mn(ClO <sub>4</sub> ) <sub>2</sub> (20 mol%)  | <b>5</b> (40)  | CH <sub>3</sub> CO <sub>3</sub> H <sup>a</sup> (4.0 equiv.)                  | -78        | 2        | 40% (3:1 d.r.) |
| 14    | Mn(ClO <sub>4</sub> ) <sub>2</sub> (100 mol%) | <b>5</b> (200) | CH <sub>3</sub> CO <sub>3</sub> H <sup>a</sup> (4.0 equiv.)                  | -78        | 2        | N.R.           |
| 15    | Mn(ClO <sub>4</sub> ) <sub>2</sub> (10 mol%)  | <b>5</b> (20)  | CH <sub>3</sub> CO <sub>3</sub> H <sup>a</sup> (4.0 equiv.)                  | -78        | 2        | 23% (3:1 d.r.) |
| 16    | Mn(ClO <sub>4</sub> ) <sub>2</sub> (5 mol%)   | <b>5</b> (10)  | CH <sub>3</sub> CO <sub>3</sub> H <sup>a</sup> (4.0 equiv.)                  | -78        | 2        | 11% (3:1 d.r.) |

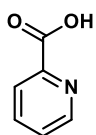

**ligand 2**

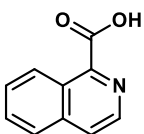

**ligand 3**

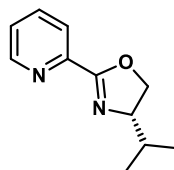

**ligand 4**

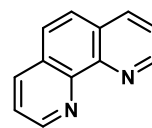

**ligand 5**

<sup>a</sup>freshly-prepared, H<sub>2</sub>SO<sub>4</sub>-free CH<sub>3</sub>CO<sub>3</sub>H

### 3-2. Table S2: Optimization of arenophile-mediated epoxidation of naphthalene.

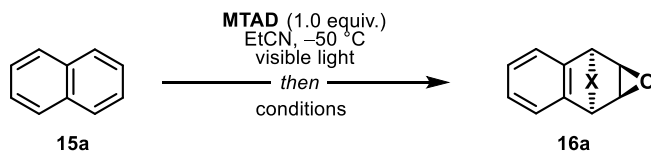

| Entry | [Mn] (mol%)                                     | Ligand (mol%)   | Oxidant                                        | Temp. (°C) | Time (h) | Yield            |
|-------|-------------------------------------------------|-----------------|------------------------------------------------|------------|----------|------------------|
| 1     | NA                                              | NA              | DMDO                                           | -50 to rt  | 3        | N.R.             |
| 2     | NA                                              | NA              | mCPBA                                          | -78 to rt  | 3        | N.R.             |
| 3     | MnSO <sub>4</sub> (10 mol%)                     | <b>1</b> (20)   | H <sub>2</sub> O <sub>2</sub> (2.0 equiv.)     | 0          | 2        | N.R.             |
| 4     | Cu(MeCN) <sub>4</sub> PF <sub>6</sub> (20 mol%) | NA              | mCPBA (4.0 equiv.)                             | -78        | 2        | N.R.             |
| 5     | <b>Catalyst 1</b> (20 mol %)                    | NA              | NMO (10 equiv.)<br>mCPBA, (4.0 equiv.)         | -78        | 1.5      | 30%              |
| 6     | <b>Catalyst 1</b> (20 mol %)                    | NA              | NMO (10 equiv.)<br>mCPBA, (4.0 equiv.)         | -20        | 1.5      | 11%              |
| 7     | Mn(ClO <sub>4</sub> ) <sub>2</sub> (10 mol%)    | <b>2</b> (50)   | CH <sub>3</sub> CO <sub>3</sub> H (1.0 equiv.) | -78        | 2        | 21%              |
| 8     | Mn(ClO <sub>4</sub> ) <sub>2</sub> (10 mol%)    | <b>2</b> (50)   | CH <sub>3</sub> CO <sub>3</sub> H (2.0 equiv.) | -78        | 2        | 43% (2.1:1 d.r.) |
| 9     | Mn(ClO <sub>4</sub> ) <sub>2</sub> (10 mol%)    | <b>2</b> (50)   | CH <sub>3</sub> CO <sub>3</sub> H (4.0 equiv.) | -78        | 2        | 76% (1.7:1 d.r.) |
| 10    | Mn(ClO <sub>4</sub> ) <sub>2</sub> (20 mol%)    | <b>2</b> (100)  | CH <sub>3</sub> CO <sub>3</sub> H (4.0 equiv.) | -78        | 2        | 83% (1.6:1 d.r.) |
| 11    | Mn(ClO <sub>4</sub> ) <sub>2</sub> (5 mol%)     | <b>2</b> (25)   | CH <sub>3</sub> CO <sub>3</sub> H (4.0 equiv.) | -20        | 2        | 84% (1.6:1 d.r.) |
| 12    | Mn(ClO <sub>4</sub> ) <sub>2</sub> (5 mol%)     | <b>2</b> (12.5) | CH <sub>3</sub> CO <sub>3</sub> H (4.0 equiv.) | -20        | 2        | 40% (1.6:1 d.r.) |
| 13    | Mn(ClO <sub>4</sub> ) <sub>2</sub> (3 mol%)     | <b>2</b> (15)   | CH <sub>3</sub> CO <sub>3</sub> H (4.0 equiv.) | -20        | 2        | 82% (1.6:1 d.r.) |
| 14    | Mn(ClO <sub>4</sub> ) <sub>2</sub> (5 mol%)     | <b>3</b> (25)   | CH <sub>3</sub> CO <sub>3</sub> H (4.0 equiv.) | -20        | 2        | 65% (2.4:1 d.r.) |

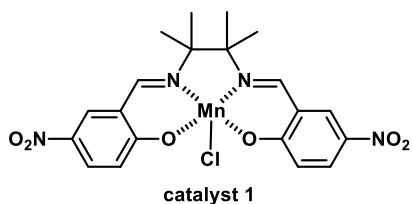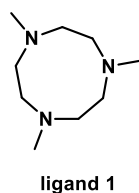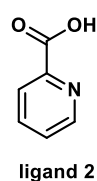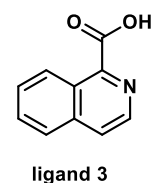

### 3-3. Table S3: Optimization of cycloreversion to arene oxides.

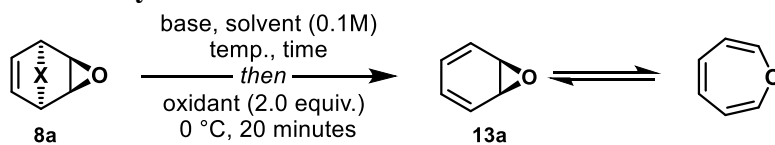

| Entry | Base | Solvent                       | Oxidant                                                                   | Temp. (°C) | Time | Yield              |
|-------|------|-------------------------------|---------------------------------------------------------------------------|------------|------|--------------------|
| 1     | KOH  | iPrOH                         | CuCl <sub>2</sub>                                                         | 100        | 16   | N.R.               |
| 2     | NA   | N <sub>2</sub> H <sub>4</sub> | CuCl <sub>2</sub>                                                         | 100        | 16   | N.R.               |
| 3     | KOH  | iPrOH                         | CuCl <sub>2</sub> · 6H <sub>2</sub> O (0.05 equiv.), O <sub>2</sub> , 16h | 40         | 2    | phenol exclusively |
| 4     | KOH  | iPrOH                         | CuCl <sub>2</sub> · 6H <sub>2</sub> O                                     | 40         | 2    | phenol             |
| 5     | KOH  | iPrOH                         | PIDA                                                                      | 40         | 2    | decomp.            |
| 6     | KOH  | iPrOH                         | Ni <sub>2</sub> O <sub>3</sub> (3.0 equiv.), 1min.                        | 40         | 2    | 58%                |

### 3-4. Table S4: Optimization of cycloreversion to benzoxepine.

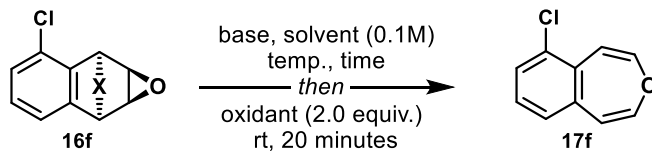

| Entry | Base | Solvent                       | Oxidant                                                                   | Temp. (°C) | Time (h) | Yield |
|-------|------|-------------------------------|---------------------------------------------------------------------------|------------|----------|-------|
| 1     | KOH  | iPrOH                         | CuCl <sub>2</sub>                                                         | 100        | 16       | N.R.  |
| 2     | KOH  | iPrOH (1mM)                   | CuCl <sub>2</sub>                                                         | 100        | 16       | N.R.  |
| 3     | KOH  | iPrOH                         | CuCl <sub>2</sub>                                                         | 100        | 16       | N.R.  |
| 4     | NA   | N <sub>2</sub> H <sub>4</sub> | CuCl <sub>2</sub>                                                         | 100        | 16       | N.R.  |
| 5     | NA   | N <sub>2</sub> H <sub>4</sub> | CuCl <sub>2</sub>                                                         | 100        | 8        | N.R.  |
| 6     | KOH  | iPrOH                         | Ni <sub>2</sub> O <sub>3</sub>                                            | 40         | 2        | 76%   |
| 7     | KOH  | iPrOH                         | PIDA                                                                      | 40         | 2        | 60%   |
| 8     | KOH  | iPrOH                         | K <sub>3</sub> Fe(CN) <sub>6</sub>                                        | 40         | 2        | 70%   |
| 9     | KOH  | iPrOH                         | CuCl <sub>2</sub>                                                         | 40         | 2        | 83%   |
| 10    | KOH  | iPrOH                         | CuCl <sub>2</sub> · 6H <sub>2</sub> O                                     | 40         | 2        | 82%   |
| 11    | KOH  | iPrOH                         | CuCl <sub>2</sub> · 6H <sub>2</sub> O (0.05 equiv.), O <sub>2</sub> , 16h | 40         | 2        | 76%   |

### 3-5. Dearomative epoxidation of monocyclic arenes

#### 3-5.1 General procedure for dearomative epoxidation with arenes

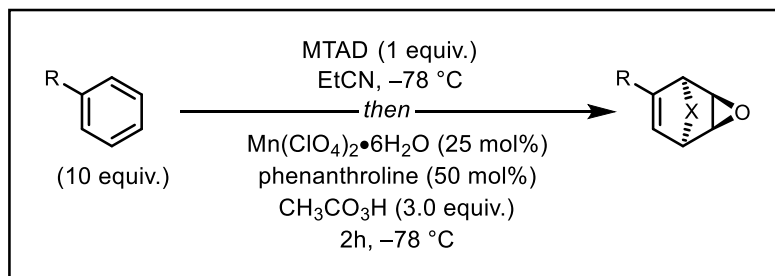

*This procedure was modified from the literature protocol.<sup>3</sup>*

*N*-Methyl-1,2,4-triazoline-3,5-dione (**7**, MTAD, 113.4 mg, 1.0 mmol, 1.0 equiv.) was placed in a test tube and propionitrile (10 mL, 0.1 M) was added at room temperature and placed in a  $-78\text{ }^{\circ}\text{C}$  chiller. Arene (10.0 mmol, 10 equiv.) was added slowly and the solution was stirred under irradiation with LED lights at  $-78\text{ }^{\circ}\text{C}$  until the solution had become colorless, which took about 12 hours with the described set up (see Section 2-2.). Upon decolorization, a solution of  $\text{Mn}(\text{ClO}_4)_2 \cdot 6\text{H}_2\text{O}$  (90.3 mg, 0.25 mmol, 25mol%) and 1,10-phenanthroline (90.1 mg, 0.5 mmol, 50 mol%) in acetonitrile (3 mL, sonicated for 1 minute), was added over the course of 10 seconds, being careful to ensure proper mixing. To this solution, was quickly added freshly-prepared peracetic acid<sup>3</sup> (8-10 wt% in acetic acid, 3.0 equiv.) and left to stir for two hours at  $-78\text{ }^{\circ}\text{C}$ . Afterwards, a 10% sodium thiosulfate solution (20 mL) was added and the organic phase was separated. The aqueous phase was extracted with ethyl acetate ( $3 \times 15\text{ mL}$ ). The organic extracts were combined and passed through a silica plug which was washed with  $\text{CH}_2\text{Cl}_2$  (15 mL). The organic phase was then dried over  $\text{MgSO}_4$  and concentrated under reduced pressure. The compound was isolated by flash chromatography ( $\text{SiO}_2$ , hexanes: ethyl acetate mixtures).

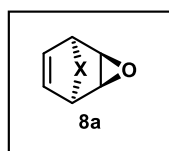

#### 5-methyl-1a,2,8,8a-tetrahydro-4H-2,8-ethenooxireno[2,3-d][1,2,4]triazolo[1,2-a]pyridazine-4,6(5H)-dione (**8a**):

Following the general procedure (1.0 mmol scale), the title compound was isolated by flash chromatography ( $\text{SiO}_2$ , hexanes:ethyl acetate = 5:1 to 1:1) as a white solid (93 mg, 3:1 d.r., 45%).

$R_f$  = 0.3 ( $\text{SiO}_2$ , hexanes:ethyl acetate = 1:1, UV)

**$^1\text{H}$  NMR:** (500 MHz,  $\text{CDCl}_3$ )  $\delta$  6.16 – 6.00 (m, 2H), 5.20 (dd,  $J$  = 4.8, 3.2, 1.6 Hz, 2H), 3.67 (dd,  $J$  = 3.2, 1.6 Hz, 2H), 3.01 (s, 3H)

**$^{13}\text{C}$  NMR:** (126 MHz,  $\text{CDCl}_3$ )  $\delta$  158.2, 125.0, 54.6, 42.1, 25.7

**HRMS:** (ESI-TOF,  $m/z$ ) calcd. For  $\text{C}_9\text{H}_{10}\text{N}_3\text{O}_3$   $[\text{M}+\text{H}]^+$ , 208.0717; found: 208.0722

**IR:** (ATR, neat,  $\text{cm}^{-1}$ ) 2923 (w), 1761 (m), 1708 (s), 1605 (m), 1511 (m), 1456 (m), 1401 (m), 1389 (m), 1373 (w), 1196 (m), 1080 (w), 1029 (w), 1011 (w), 955 (w), 930 (w), 529 (w)

**m.p.** = 188 – 191  $^{\circ}\text{C}$



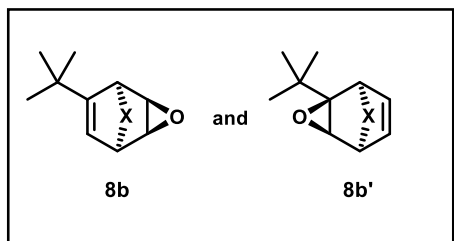

**9-(*tert*-butyl)-5-methyl-1a,2,8,8a-tetrahydro-4H-2,8-ethenooxireno[2,3-d][1,2,4]triazolo[1,2-a]pyridazine-4,6(5H)-dione (8b):**

Following the general procedure (1.0 mmol scale), the title compound was isolated by flash chromatography (SiO<sub>2</sub>, hexanes:ethyl acetate = 5:1 to 1:1) as a yellow oil (155 mg, 5:1 d.r., 3:1 r.r., 59%). where the major diastereomer was inseparable from the constitutional isomer (3:1).

**R<sub>f</sub>** = 0.4 (SiO<sub>2</sub>, hexanes:ethyl acetate = 1:1, UV)

**<sup>1</sup>H NMR:** (500 MHz, CDCl<sub>3</sub>) δ 5.63 (ddd, *J* = 6.2, 2.3, 1.0 Hz, 1H), 5.22 (dd, *J* = 4.5, 2.3 Hz, 1H), 5.12 (dd, *J* = 6.2, 4.2 Hz, 1H), 3.62 (t, *J* = 4.5 Hz, 1H), 3.58 (td, *J* = 4.2, 1.0 Hz, 1H), 2.98 (d, *J* = 1.3 Hz, 3H), 1.03 (s, 9H)

**<sup>13</sup>C NMR:** (126 MHz, CDCl<sub>3</sub>) δ 158.3, 157.8, 157.4, 156.9, 148.6, 127.1, 123.9, 113.3, 57.0, 55.2, 55.1, 54.2, 46.5, 42.7, 41.9, 33.1, 31.8, 27.9, 25.9, 25.6, 25.6

**HRMS:** (ESI-TOF, *m/z*) calcd. For C<sub>13</sub>H<sub>18</sub>N<sub>3</sub>O<sub>3</sub> [M+H]<sup>+</sup>, 264.1343; found: 264.1353

**IR:** (ATR, neat, cm<sup>-1</sup>) 2964 (w), 2872 (w), 1773 (m), 1703 (s), 1632 (m), 1453 (m), 1394 (m), 1366 (w), 1201 (m), 1092 (w), 1009 (w), 957 (m), 768 (w)

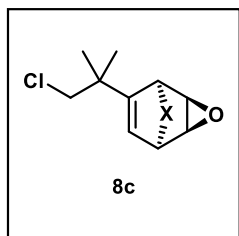

**9-(1-chloro-2-methylpropan-2-yl)-5-methyl-1a,2,8,8a-tetrahydro-4H-2,8-ethenooxireno[2,3-d][1,2,4]triazolo[1,2-a]pyridazine-4,6(5H)-dione (8c):**

Following the general procedure (1.0 mmol scale), the title compound was isolated by flash chromatography (SiO<sub>2</sub>, hexanes:ethyl acetate = 5:1 to 1:1) as an off-white oil (123 mg, 7:1 d.r., 41%)

**R<sub>f</sub>** = 0.4 (SiO<sub>2</sub>, hexanes:ethyl acetate = 1:1, UV)

**<sup>1</sup>H NMR:** (500 MHz, CDCl<sub>3</sub>) δ 5.76 (dd, *J* = 6.2, 2.3 Hz, 1H), 5.18 (m, 2H), 3.66 (t, *J* = 4.3 Hz, 1H), 3.62 (t, *J* = 4.3 Hz, 1H), 3.49 (d, *J* = 11.1 Hz, 1H), 3.36 (d, *J* = 11.1 Hz, 1H), 2.97 (s, 3H), 1.15 (s, 3H), 1.13 (s, 3H)

**<sup>13</sup>C NMR:** (126 MHz, CDCl<sub>3</sub>) δ 158.1, 157.5, 142.6, 118.0, 54.8, 54.3, 52.4, 42.5, 42.0, 38.4, 25.7, 24.5, 23.4

**HRMS:** (ESI-TOF, *m/z*) calcd. For C<sub>13</sub>H<sub>17</sub>N<sub>3</sub>O<sub>3</sub> [M+H]<sup>+</sup>, 298.0953; found: 298.0959

**IR:** (ATR, neat, cm<sup>-1</sup>) 2970 (w), 1706 (s), 1455 (m), 1394 (w), 1229 (m), 1205 (m), 954 (w), 769 (w), 527 (w)

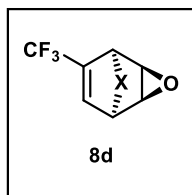

**5-methyl-9-(trifluoromethyl)-1a,2,8,8a-tetrahydro-4H-2,8-ethenooxireno[2,3-d][1,2,4]triazolo[1,2-a]pyridazine-4,6(5H)-dione (8d):**

Following the general procedure (1.0 mmol scale), the title compound was isolated by flash chromatography (SiO<sub>2</sub>, hexanes:ethyl acetate = 5:1 to 1:1) as a yellow oil (105 mg, >20:1 d.r., 38%).

**R<sub>f</sub>** = 0.4 (SiO<sub>2</sub>, hexanes:ethyl acetate = 1:1, UV)

**<sup>1</sup>H NMR:** (500 MHz, CDCl<sub>3</sub>) δ 6.60 – 6.44 (m, 1H), 5.39 (dd, *J* = 4.4, 2.3 Hz, 1H), 5.34 (dd, *J* = 6.1, 4.4 Hz, 1H), 3.79 (t, *J* = 4.3 Hz, 1H), 3.75 (td, *J* = 4.3, 0.9 Hz, 1H), 3.02 (s, 3H)

**<sup>13</sup>C NMR:** (126 MHz, CDCl<sub>3</sub>) δ 157.7, 157.1, 127.9 (q, *J* = 36.57), 125.9 (q, *J* = 5.78), 120.0 (q, *J* = 120.24), 53.5, 53.3, 42.0, 41.4, 25.9

**<sup>19</sup>F NMR:** (471 MHz, CDCl<sub>3</sub>) δ -67.37

**HRMS:** (ESI-TOF, *m/z*) calcd. For C<sub>10</sub>H<sub>9</sub>N<sub>3</sub>O<sub>3</sub>F<sub>3</sub> [M+H]<sup>+</sup>, 276.0591; found: 276.0594

**IR:** (ATR, neat, cm<sup>-1</sup>) 2970 (w), 1718 (s), 1455 (m), 1375 (m), 1266 (w), 1216 (m), 768 (w), 527 (w)

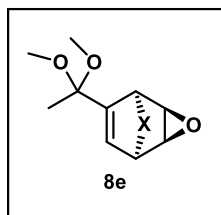

**9-(1,1-dimethoxyethyl)-5-methyl-1a,2,8,8a-tetrahydro-4H-2,8-ethenooxireno[2,3-d][1,2,4]triazolo[1,2-a]pyridazine-4,6(5H)-dione (8e):**

The work-up is modified from the general procedure as follows:

The reaction was quenched with a 10% sodium thiosulfate solution (20 mL) and saturated NaHCO<sub>3</sub> (40 mL) and the organic phase was separated. The aqueous phase was extracted with ethyl acetate (3 × 15 mL). The organic extracts were combined and passed through a silica plug and flushed with CH<sub>2</sub>Cl<sub>2</sub> (15 mL). The organic phase was then dried over MgSO<sub>4</sub> and concentrated under reduced pressure. The title compound was isolated by column chromatography (SiO<sub>2</sub>, hexanes:ethyl acetate (SiO<sub>2</sub>, 5:1 to 1:1 with 1% Et<sub>3</sub>N) as a light yellow oil (77 mg, >20:1 d.r., 26%).

**R<sub>f</sub>** = 0.3 (SiO<sub>2</sub>, hexanes:ethyl acetate = 1:1, UV)

**<sup>1</sup>H NMR:** (500 MHz, CDCl<sub>3</sub>) δ 6.06 (ddd, *J* = 6.2, 2.2, 1.0 Hz, 1H), 5.30 (dd, *J* = 4.2, 2.2 Hz, 1H), 5.23 (dd, *J* = 6.2, 4.2 Hz, 1H), 3.66 (m, 2H), 3.17 (s, 3H), 3.13 (s, 3H), 2.99 (s, 3H), 1.31 (s, 3H)

**<sup>13</sup>C NMR:** (126 MHz, CDCl<sub>3</sub>) δ 157.6, 157.1, 140.4, 120.0, 99.1, 54.8, 54.2, 49.5, 49.2, 42.9, 42.1, 25.6, 22.8

**HRMS:** (ESI-TOF, *m/z*) calcd. For C<sub>13</sub>H<sub>17</sub>N<sub>3</sub>O<sub>5</sub>Na [M+Na]<sup>+</sup>, 318.1066; found: 318.1073

**IR:** (ATR, neat, cm<sup>-1</sup>) 2956 (w), 1777 (m), 1708 (s), 1455 (m), 1397 (m), 1190 (m), 1144 (m), 1040 (s), 917(w), 732 (w), 732 (m)

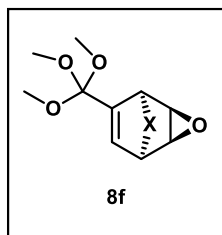

**5-methyl-9-(trimethoxymethyl)-1a,2,8,8a-tetrahydro-4H-2,8-ethenooxireno[2,3-d][1,2,4]triazolo[1,2-a]pyridazine-4,6(5H)-dione (8f):**

The work-up is modified from the general procedure as follows:

The reaction was quenched with a 10% sodium thiosulfate solution (20mL) and saturated NaHCO<sub>3</sub> (40 mL) and the organic phase was separated. The aqueous phase was extracted with ethyl acetate (3 × 15 mL). The organic extracts were combined and passed through a silica plug and flushed with CH<sub>2</sub>Cl<sub>2</sub> (15 mL). The organic phase was then dried over MgSO<sub>4</sub> and concentrated under reduced pressure. The title compound was isolated by column chromatography (SiO<sub>2</sub>, hexanes:ethyl acetate (SiO<sub>2</sub>, 5:1 to 1:1 with 1% Et<sub>3</sub>N) as an off-white solid (141 mg, >20:1 d.r., 45%).

**R<sub>f</sub>** = 0.3 (SiO<sub>2</sub>, hexanes:ethyl acetate = 1:1, UV)

**<sup>1</sup>H NMR:** (500 MHz, CDCl<sub>3</sub>) δ 6.18 (dd, *J* = 6.1, 2.1 Hz, 1H), 5.37 – 5.21 (m, 2H), 3.74 – 3.62 (m, 2H), 3.12 (d, *J* = 0.9 Hz, 9H), 2.97 (s, 3H)

**<sup>13</sup>C NMR:** (126 MHz, CDCl<sub>3</sub>) δ 157.2, 156.3, 134.3, 123.6, 112.3, 54.4, 53.7, 49.9, 42.7, 42.1, 25.6

**HRMS:** (ESI-TOF, *m/z*) calcd. For C<sub>13</sub>H<sub>17</sub>N<sub>3</sub>O<sub>6</sub>Na [M+Na]<sup>+</sup>, 334.1001; found:334.1030

**IR:** (ATR, neat, cm<sup>-1</sup>) 2949 (w), 1778 (m), 1704 (s), 1451 (m), 1394 (m), 1242 (m), 1181 (m), 1094 (s), 1065 (s), 768 (w), 529 (w)

**m.p.** = 162 – 164 °C

### 3-5.2 General procedure for the synthesis of arene oxides/oxepines

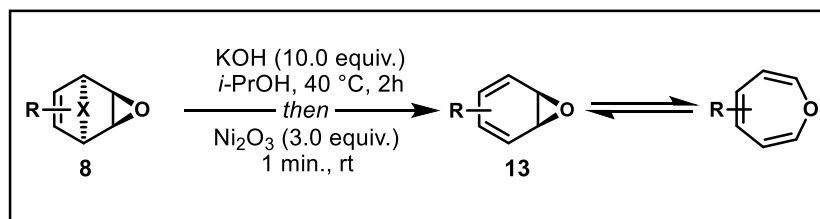

To a vial containing finely ground KOH (120 mg, 10 equiv., 90 wt%), and substrate (0.20 mmol, 1.0 equiv.) under nitrogen was added *i*PrOH (2 mL, 0.1 M) and degassed with sonication and nitrogen for 15 min. The reaction was heated to 40 °C with vigorous stirring (1000 rpm) for 2 hours or until complete conversion by TLC. Upon completion, the reaction was cooled in an ice bath and H<sub>2</sub>O (2 mL) was added. AcOH was then carefully added dropwise until pH 5. The semicarbazide intermediate was then extracted out with ethyl acetate (3 × 5 mL). The organic layers were combined, dried with NaHCO<sub>3</sub> and concentrated under reduced pressure.

This mixture containing the semicarbazide was added to vial, followed by CDCl<sub>3</sub> (2.0 mL, 0.1 M), and sparged with nitrogen for 15 minutes. Next, nickel oxide (Ni<sub>2</sub>O<sub>3</sub>, 30% active basis, 330 mg, 3.0 equiv.) was added as a solid under a stream of nitrogen (note: vigorous gas evolution was observed). The solution was agitated manually for 1 minute, filtered through a celite plug, and the celite was washed thoroughly with CDCl<sub>3</sub> to yield the resulting arene-oxide as a solution. Due to the pronounced instability and volatility of

these arene-oxides, further purification was impractical and yields were determined by  $^1\text{H}$ -NMR internal standard ( $\text{MeNO}_2$ ).  $\text{MeNCO}$  was observed as a byproduct after filtering through celite in all cases. IR spectra were not acquired due to the instability of these compounds upon sample preparation.

*Note: Arene oxides are suspected carcinogens. Caution in the handling of these compounds should be used.*

*Note: In many instances, due to the valence tautomerization of arene-oxide/oxepins,  $^{13}\text{C}$  signals corresponding to the carbon next to oxygen can be severely broadened. In these cases, it was necessary to assign these peaks via HSQC/HMBC.*

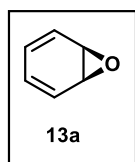

**Benzene-Oxide (7-oxabicyclo[4.1.0]hepta-2,4-diene, 13a):**

Following the general procedure (0.20 mmol scale), the title compound was obtained as a yellow solution in  $\text{CDCl}_3$  using  $\text{MeNO}_2$  as internal standard (58% yield). See  $^1\text{H}$  NMR spectra of **13a** for graphical visualization of internal standard.

**$^1\text{H}$  NMR:** (500 MHz,  $\text{CDCl}_3$ )  $\delta$  6.26 (dd,  $J = 5.1, 2.9$  Hz, 2H), 5.94 (td,  $J = 4.8, 2.9$  Hz, 2H), 5.09 (d,  $J = 4.8$  Hz, 2H)

**$^{13}\text{C}$  NMR:** (126 MHz,  $\text{CDCl}_3$ )  $\delta$  129.5, 121.5, 105.3

**HRMS:** (EI,  $m/z$ ) calcd. For  $\text{C}_6\text{H}_6\text{O}$   $[\text{M}]^+$ , 94.04132; found: 94.04195

*The analytical data were in accordance with previously reported values.<sup>7</sup>*

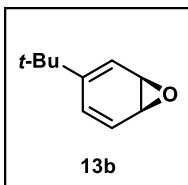

**3-(tert-butyl)-7-oxabicyclo[4.1.0]hepta-2,4-diene (13b):**

Since the undesirable constitutional isomer (**8b'**) was inseparable from **8b**, the resultant semicarbazides were separated after KOH hydrolysis utilizing a silica plug (ethyl acetate, 100%). The title compound was obtained as a yellow solution in  $\text{CDCl}_3$  using  $\text{MeNO}_2$  as internal standard (82% yield).

**$^1\text{H}$  NMR:** (500 MHz,  $\text{CDCl}_3$ )  $\delta$  6.32 (dt,  $J = 8.5, 1.5$  Hz, 1H), 6.12 (dd,  $J = 8.5, 4.3$  Hz, 1H), 6.01 (ddd,  $J = 4.7, 1.5, 0.8$  Hz, 1H), 4.71 (dd,  $J = 4.7, 2.5$  Hz, 1H), 4.65 (ddd,  $J = 4.0, 2.5, 1.2$  Hz, 1H), 1.13 (s, 9H)

**$^{13}\text{C}$  NMR:** (126 MHz,  $\text{CDCl}_3$ )  $\delta$  150.4, 126.6, 123.7, 118.0, 84.6\*, 85.6\*, 35.0, 29.5 (\*detected by HSQC)

**HRMS:** (ESI-TOF,  $m/z$ ) calcd. For  $\text{C}_{10}\text{H}_{15}\text{O}$   $[\text{M}+\text{H}]^+$ , 151.1117; found: 151.1124

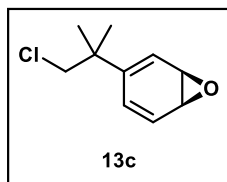

**3-(1-chloro-2-methylpropan-2-yl)-7-oxabicyclo[4.1.0]hepta-2,4-diene (13c):**

Following the general procedure (0.20 mmol scale), the title compound was obtained as a yellow solution in CDCl<sub>3</sub> using MeNO<sub>2</sub> as internal standard (79% yield).

**<sup>1</sup>H NMR:** (500 MHz, CDCl<sub>3</sub>) δ 6.28 (d, *J* = 8.3 Hz, 1H), 6.12 (dd, *J* = 8.3, 4.4 Hz, 1H), 6.01 (d, *J* = 4.8 Hz, 1H), 4.82 (dd, *J* = 4.8, 2.2 Hz, 1H), 4.79 – 4.75 (m, 1H), 3.49 (s, 2H), 1.23 (s, 6H)

**<sup>13</sup>C NMR:** (126 MHz, CDCl<sub>3</sub>) δ 145.57, 126.7, 123.6, 119.7, 89.8\*, 89.3\*, 54.3, 40.2, 25.2 (\*detected by HMBC)

**HRMS:** (ESI-TOF, *m/z*) calcd. For C<sub>10</sub>H<sub>14</sub>OCl [M+H]<sup>+</sup>, 185.0728; found: 185.0740

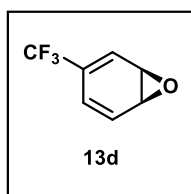

**3-(trifluoromethyl)-7-oxabicyclo[4.1.0]hepta-2,4-diene (13d):**

Following the general procedure (0.20 mmol scale), the title compound was obtained as a yellow solution in CDCl<sub>3</sub> using MeNO<sub>2</sub> as internal standard (74% yield).

**<sup>1</sup>H NMR:** (500 MHz, CDCl<sub>3</sub>) δ 6.59 (d, *J* = 7.1 Hz, 1H), 6.04 (d, *J* = 5.0 Hz, 1H), 5.94 (dd, *J* = 6.9, 5.0 Hz, 1H), 5.40 (m, 2H)

**<sup>13</sup>C NMR:** (500 MHz, CDCl<sub>3</sub>) δ 131.5 (q, *J* = 31.3 Hz), 128.4 (q, *J* = 4.9 Hz), 123.1 (q, *J* = 272.5 Hz), 119.5, 118.5, 117.2\*, 117.1 (q, *J* = 3.6 Hz) (\*signal detected by HSQC)

**<sup>19</sup>F NMR:** (471 MHz, CDCl<sub>3</sub>) δ -67.38

**HRMS:** (ESI-TOF, *m/z*) calcd. For C<sub>7</sub>H<sub>6</sub>OF<sub>3</sub> [M+H]<sup>+</sup>, 163.0365; found: 163.0373

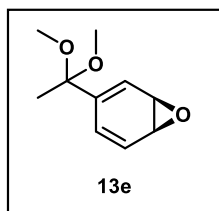

**3-(1,1-dimethoxyethyl)-7-oxabicyclo[4.1.0]hepta-2,4-diene (13e):**

Following the general procedure (0.20 mmol scale), the title compound was obtained as a yellow solution in CDCl<sub>3</sub> using MeNO<sub>2</sub> as internal standard (74% yield).

**<sup>1</sup>H NMR:** (500 MHz, CDCl<sub>3</sub>) δ 6.41 (dt, *J* = 8.0, 1.2 Hz, 1H), 6.17 – 6.12 (m, 1H), 6.04 (dd, *J* = 8.0, 4.5 Hz, 1H), 4.93 (dd, *J* = 4.8, 1.7 Hz, 1H), 4.90 (dt, *J* = 4.5, 1.7 Hz, 1H), 3.15 (s, 6H), 1.39 (s, 3H)

**<sup>13</sup>C NMR:** (126 MHz, CDCl<sub>3</sub>) δ 142.5, 127.4, 122.3, 120.4, 100.8, 96.3, 96.2, 49.0, 23.8

**HRMS:** (EI, *m/z*) calcd. For C<sub>10</sub>H<sub>14</sub>O<sub>3</sub> [M]<sup>+</sup>, 182.0937; found: 182.0949

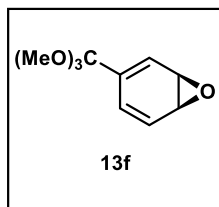

**3-(trimethoxymethyl)-7-oxabicyclo[4.1.0]hepta-2,4-diene (13f):**

Following the general procedure (0.20 mmol scale), the title compound was obtained as a yellow solution in CDCl<sub>3</sub> using MeNO<sub>2</sub> as internal standard (73% yield).

**<sup>1</sup>H NMR:** (500 MHz, CDCl<sub>3</sub>) δ 6.48 (d, *J* = 7.7 Hz, 1H), 6.11 (d, *J* = 4.5 Hz, 1H), 5.98 (dd, *J* = 7.7, 4.5 Hz, 1H), 5.09 (m, 2H), 3.15 (s, 9H)

**<sup>13</sup>C NMR:** (126 MHz, CDCl<sub>3</sub>) δ 136.8, 129.1, 121.1, 120.9, 113.9, 104.9, 104.2, 49.7

**HRMS:** (ESI-TOF, m/z) calcd. For C<sub>10</sub>H<sub>14</sub>O<sub>4</sub>Na [M+Na]<sup>+</sup>, 221.0790; found: 221.0799

### 3-6 Dearomative epoxidation of polycyclic arenes

#### 3-6.1 General procedure for dearomative epoxidation with polycyclic arenes at –20 °C (General Procedure A)

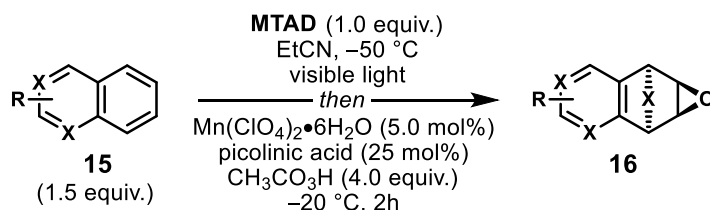

*This procedure was modified from the literature protocol.<sup>6</sup>*

A solution of *N*-methyl-1,2,4-triazoline-3,5-dione (**7**, MTAD, 113.4 mg, 1.0 mmol, 1.0 equiv.) and arene (1.5 mmol, 1.5 equiv.) in propionitrile (10.0 mL) was irradiated with LED lights at –78 °C under a nitrogen atmosphere (see Section 2-2.). Upon decolorization, which generally proceeds within 3 – 12 hours with the described setup, the reaction vessel was transferred to a –20 °C bath under high stirring (600 rpm). A suspension of Mn(ClO<sub>4</sub>)<sub>2</sub>•6H<sub>2</sub>O (18.1 mg, 0.05 mmol, 0.05 equiv., 5 mol%) and picolinic acid (31 mg, 0.25 mmol, 0.25 equiv., 25 mol%) in acetonitrile (4 mL, sonicated for 1 minute), was added to the reaction mixture over the course of 10 seconds, being careful to ensure proper mixing. To this solution was added peracetic acid (32 wt% in dilute acetic acid, 0.84 mL, 4.0 equiv.) over the course of 10 seconds. The reaction was then left to stir for 2 hours at –20 °C. Afterwards, a 10% sodium thiosulfate solution (20 mL) was added and the aqueous phase was separated. The organic phase was extracted with ethyl acetate (3 × 15 mL), then the organic extracts were combined, dried over MgSO<sub>4</sub>, and concentrated under reduced pressure. The product was immediately isolated by flash chromatography (SiO<sub>2</sub>, hexanes: ethyl acetate mixtures).

#### 3-6.2 General procedure for dearomative epoxidation with polycyclic arenes at –78 °C (General Procedure B)

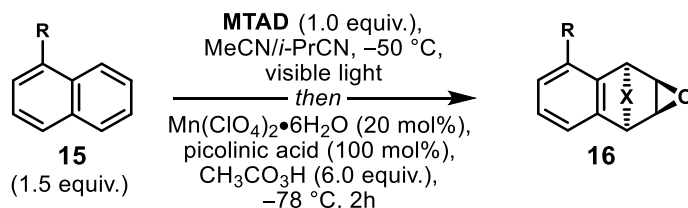

*This procedure was modified from the literature protocol.<sup>6</sup>*

A solution of *N*-methyl-1,2,4-triazoline-3,5-dione (**7**, MTAD, 113.4 mg, 1.0 mmol, 1.0 equiv.) and arene (1.5 mmol, 1.5 equiv.) in propionitrile (10.0 mL) was irradiated with LED lights at –78 °C under a nitrogen atmosphere (see Section 2-2.). Upon decolorization, which generally proceeds within 8 – 12 hours with the described setup, the reaction was then transferred to a bath at –78 °C under high stirring (600 rpm). A

suspension of  $\text{Mn}(\text{ClO}_4)_2 \cdot 6\text{H}_2\text{O}$  (72.4 mg, 0.20 mmol, 0.20 equiv.) and picolinic acid (123.1 mg, 1.0 mmol, 1.0 equiv.) in acetonitrile (8 mL, sonicated for 1 minute), was added over the course of 10 seconds, being careful to ensure proper mixing. To this solution was added peracetic acid (32 wt% in dilute acetic acid, 1.3 mL, 6.0 equiv.) over the course of 1 hour in 6 evenly spaced portions and left to stir for another hour at  $-78^\circ\text{C}$ . The reaction was warmed to room temperature, upon which a 10% sodium thiosulfate solution (20 mL) was added and the organic phase was separated. The aqueous phase was extracted with ethyl acetate ( $3 \times 15$  mL). The organic extracts were combined and filtered through a plug of silica gel, which was washed with  $\text{CH}_2\text{Cl}_2$  (15 mL). The organic phase was then dried over  $\text{MgSO}_4$  and concentrated under reduced pressure. The product was immediately isolated by flash chromatography ( $\text{SiO}_2$ , hexanes: ethyl acetate mixtures).

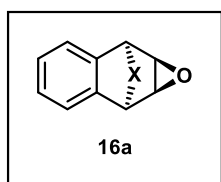

**2-methyl-5,10-dihydro-1H-5,10-[2,3]epoxireno[1,2,4]triazolo[1,2-b]phthalazine-1,3(2H)-dione (16a):**

Following **General Procedure A** (1.0 mmol scale), the title compound was isolated by flash chromatography ( $\text{SiO}_2$ , hexanes:ethyl acetate = 5:1 to 1:1) as a white solid (217 mg, 1.6:1 d.r., 84%).

$R_f$  = 0.3 ( $\text{SiO}_2$ , hexanes:ethyl acetate = 1:1, UV)

**$^1\text{H}$  NMR:** (500 MHz,  $\text{CDCl}_3$ )  $\delta$  7.41 (dd,  $J$  = 5.4, 3.2 Hz, 2H), 7.30 – 7.23 (m, 2H), 5.66 (dd,  $J$  = 3.2, 1.7 Hz, 2H), 3.89 (dd,  $J$  = 3.2, 1.7 Hz, 2H), 2.82 (s, 3H)

**$^{13}\text{C}$  NMR:** (126 MHz,  $\text{CDCl}_3$ )  $\delta$  157.1, 129.87, 129.83, 124.4, 57.8, 44.4, 25.5

**HRMS:** (ESI-TOF,  $m/z$ ) calcd. for  $\text{C}_{13}\text{H}_{12}\text{N}_3\text{O}_3$   $[\text{M}+\text{H}]^+$ , 258.0873; found: 258.0887

**IR:** (ATR, neat,  $\text{cm}^{-1}$ ) = 3014 (w), 1761 (m), 1701 (s), 1467(m), 1447(m), 1395 (m), 1227 (w), 1214 (w), 1170 (w), 1037 (w), 964 (m), 923 (w), 864 (m), 755 (m), 701 (w), 662 (w), 552 (m), 502 (w)

**m.p.** = 244 – 245  $^\circ\text{C}$

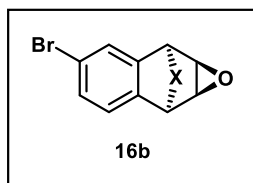

**7-bromo-2-methyl-5,10-dihydro-1H-5,10-[2,3]epoxireno[1,2,4]triazolo[1,2-b]phthalazine-1,3(2H)-dione (16b):**

Following **General Procedure A** (1.0 mmol scale), the title compound was isolated by flash chromatography ( $\text{SiO}_2$ , hexanes:ethyl acetate = 5:1 to 1:1) as a white solid (183 mg, 5:1 d.r., 54%).

$R_f$  = 0.3 ( $\text{SiO}_2$ , hexanes:ethyl acetate = 1:1, UV)

**$^1\text{H}$  NMR:** (500 MHz,  $\text{CDCl}_3$ )  $\delta$  7.59 – 7.52 (m, 1H), 7.44 – 7.38 (m, 1H), 7.14 (d,  $J$  = 7.9 Hz, 1H), 5.62 (dd,  $J$  = 9.7, 3.4 Hz, 2H), 3.89 (d,  $J$  = 3.4 Hz, 2H), 2.85 (s, 3H)

**$^{13}\text{C}$  NMR:** (126 MHz,  $\text{CDCl}_3$ )  $\delta$  157.0, 156.9, 132.9, 131.6, 128.7, 127.7, 126.1, 123.7, 57.3, 57.2, 44.3, 44.2, 25.7

**HRMS:** (ESI-TOF,  $m/z$ ) calculated for  $\text{C}_{13}\text{H}_{11}\text{N}_3\text{O}_3$   $[\text{M}+\text{H}]^+$ , 335.9978; found: 335.9989

**IR:** (ATR, neat,  $\text{cm}^{-1}$ ) 1771 (m), 1705 (s), 1453 (m), 1394 (w), 1199 (w), 963 (w), 851 (w), 767 (w), 730 (w), 571 (w), 523 (m)

**m.p.** = 194 – 196 °C

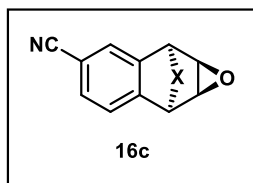

**2-methyl-1,3-dioxo-2,3,5,10-tetrahydro-1H-5,10-[2,3]epoxireno[1,2,4]triazolo[1,2-b]phthalazine-7-carbonitrile (16c):**

Following **General Procedure A** (1.0 mmol scale), the title compound was isolated by flash chromatography ( $\text{SiO}_2$ , hexanes:ethyl acetate = 10:1 to 1:1) as a colorless oil (160.2 mg, 7:1 d.r., 57%).

**R<sub>f</sub>** = 0.3 ( $\text{SiO}_2$ , hexanes:ethyl acetate = 1:1, UV)

**<sup>1</sup>H NMR:** (500 MHz,  $\text{CDCl}_3$ )  $\delta$  7.73 (dd,  $J$  = 7.7, 1.6 Hz, 1H), 7.55 (d,  $J$  = 1.6 Hz, 1H), 7.39 (d,  $J$  = 7.7 Hz, 1H), 5.71 (m, 2H), 4.02 – 3.89 (m, 2H), 2.84 (s, 3H).

**<sup>13</sup>C NMR:** (126 MHz,  $\text{CDCl}_3$ )  $\delta$  156.78\*, 134.4, 134.0, 131.1, 127.9, 125.4, 117.8, 113.9, 57.2, 57.0, 44.2, 44.1, 25.7 (\*2 peaks overlapping)

**HRMS:** (ESI-TOF,  $m/z$ ) calculated for  $\text{C}_{14}\text{H}_{11}\text{N}_4\text{O}_3$   $[\text{M}+\text{H}]^+$ , 283.0826; found: 283.0835

**IR:** (ATR, neat,  $\text{cm}^{-1}$ ) 3055 (w), 2231 (w), 1772 (m), 1701 (s), 1451 (m), 1394 (w), 1197 (w), 1033 (m), 964 (m), 911 (m), 852 (m), 728 (m), 590 (w), 539 (m)

**m.p.** = 97 – 100 °C

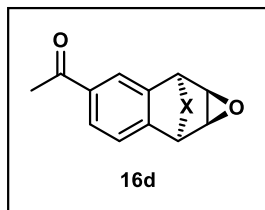

**7-acetyl-2-methyl-5,10-dihydro-1H-5,10-[2,3]epoxireno[1,2,4]triazolo[1,2-b]phthalazine-1,3(2H)-dione (16d):**

Following **General Procedure A** (1.0 mmol scale), the title compound was isolated by flash chromatography ( $\text{SiO}_2$ , hexanes:ethyl acetate = 5:1 to 1:1) as a white solid (183 mg, 5:1 d.r., 61%).

**R<sub>f</sub>** = 0.2 ( $\text{SiO}_2$ , hexanes:ethyl acetate = 1:1, UV)

**<sup>1</sup>H NMR:** (500 MHz,  $\text{CDCl}_3$ )  $\delta$  8.02 (dd,  $J$  = 7.8, 1.7 Hz, 1H), 7.84 (d,  $J$  = 1.7 Hz, 1H), 7.37 (d,  $J$  = 7.8 Hz, 1H), 5.76 – 5.69 (m, 2H), 3.97 – 3.90 (m, 2H), 2.82 (s, 3H), 2.60 (s, 3H).

**<sup>13</sup>C NMR:** (126 MHz,  $\text{CDCl}_3$ )  $\delta$  196.9, 156.88\*, 138.4, 134.4, 130.4, 130.0, 124.8, 124.3, 57.7, 57.3, 44.4, 44.3, 26.8, 25.6 (\*2 peaks overlapping)

**HRMS:** (ESI-TOF,  $m/z$ ) calculated for  $\text{C}_{15}\text{H}_{14}\text{N}_3\text{O}_4$   $[\text{M}+\text{H}]^+$ , 300.0979; found: 300.0995.

**IR:** (ATR, neat,  $\text{cm}^{-1}$ ) 3006 (w), 2954 (w), 2252 (w), 1771 (m), 1704 (s), 1454 (m), 1394 (m), 1359 (m), 1270 (w), 1194 (w), 1031 (w), 913 (w), 852 (w), 766 (w), 729 (m), 655 (w), 603 (w), 562 (m), 523 (w).

**m.p.** = 176.5 °C (decomp.)



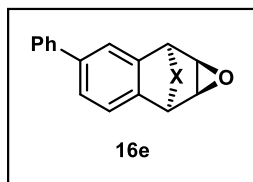

**2-methyl-7-phenyl-5,10-dihydro-1H-5,10-[2,3]epoxireno[1,2,4]triazolo[1,2-b]phthalazine-1,3(2H)-dione (16e):**

Following **General Procedure A** (1.0 mmol scale), the title compound was isolated by flash chromatography (SiO<sub>2</sub>, hexanes:ethyl acetate = 10:1 to 1:1) as a colorless gel (136 mg, 3:1 d.r., inseparable, 41%).

**R<sub>f</sub>** = 0.3 (SiO<sub>2</sub>, hexanes:ethyl acetate = 1:1, UV)

**Discernable major diastereomer <sup>1</sup>H NMR:** (500 MHz, CDCl<sub>3</sub>) δ 7.32 (d, *J* = 7.7 Hz, 1H), 5.74 – 5.67 (m, 2H), 3.97 – 3.87 (m, 2H), 2.85 (s, 3H)

**Major diastereomer <sup>13</sup>C NMR:** (126 MHz, CDCl<sub>3</sub>) δ 157.1, 157.0, 142.9, 140.0, 130.4, 129.2, 129.0, 128.4, 128.0, 127.3, 124.8, 123.2, 57.9, 57.6, 44.6, 44.6, 25.6.5

**Discernable minor diastereomer <sup>1</sup>H NMR:** (500 MHz, CDCl<sub>3</sub>) δ 7.67 (d, *J* = 1.7 Hz, 1H), 5.56 (ddd, *J* = 9.1, 3.1, 1.1 Hz, 1H), 3.73 (dt, *J* = 2.9, 1.4 Hz, 1H), 3.10 (s, 1H)

**Minor diastereomer <sup>13</sup>C NMR:** (126 MHz, CDCl<sub>3</sub>) δ 156.98, 156.97, 142.8, 140.0, 136.6, 134.7, 128.7, 128.2, 128.0, 127.4, 126.2, 124.8, 57.8, 57.7, 54.3, 53.9, 25.7

**<sup>1</sup>H NMR:** (500 MHz, CDCl<sub>3</sub>) δ 7.67 (d, *J* = 1.7 Hz, 0.4H), 7.62 (m, 1.3H), 7.59 – 7.51 (m, 3.4H), 7.50 – 7.34 (m, 5.3H), 7.32 (d, *J* = 7.7 Hz, 1H), 5.71 (ddt, *J* = 7.3, 5.0, 2.7 Hz, 2H), 5.56 (ddd, *J* = 9.1, 3.1, 1.1 Hz, 0.8H), 3.96 – 3.88 (m, 2H), 3.73 (dt, *J* = 2.9, 1.4 Hz, 0.8H), 3.10 (s, 1H), 2.85 (s, 3H)

**HRMS:** (ESI-TOF, *m/z*) calculated for C<sub>19</sub>H<sub>16</sub>N<sub>3</sub>O<sub>3</sub> [M+H]<sup>+</sup>, 334.1186; found: 334.1191.

**IR:** (ATR, neat, cm<sup>-1</sup>) 3497 (w), 1760 (m), 1682 (s,br), 1451 (m), 1387 (m), 1217 (m), 1026 (w), 917 (w), 837 (w), 758 (m), 711 (m)

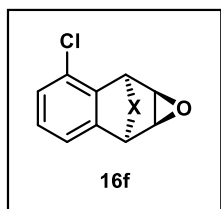

**6-chloro-2-methyl-5,10-dihydro-1H-5,10-[2,3]epoxireno[1,2,4]triazolo[1,2-b]phthalazine-1,3(2H)-dione (16f):**

Following **General Procedure B** (1.0 mmol scale), the title compound was isolated by flash chromatography (SiO<sub>2</sub>, hexanes:ethyl acetate = 5:1 to 1:1) as a white solid (219 mg, >20:1 d.r., 75%).

**R<sub>f</sub>** = 0.3 (SiO<sub>2</sub>, hexanes:ethyl acetate = 1:1, UV)

**<sup>1</sup>H NMR:** (500 MHz, CDCl<sub>3</sub>) δ 7.42 (dd, *J* = 8.3, 1.0 Hz, 1H), 7.33 (t, *J* = 7.8 Hz, 1H), 7.19 – 7.10 (m, 1H), 6.14 (d, *J* = 4.6 Hz, 1H), 5.64 (d, *J* = 4.5 Hz, 1H), 3.93 (t, *J* = 4.5 Hz, 1H), 3.88 (t, *J* = 4.4 Hz, 1H), 2.84 (s, 3H).

**<sup>13</sup>C NMR:** (126 MHz, CDCl<sub>3</sub>) δ 157.0, 156.9, 131.7, 130.7, 130.32, 130.30, 128.20, 122.94, 57.5, 54.6, 44.13, 44.11, 25.7

**HRMS:** (ESI-TOF, *m/z*) calcd. for C<sub>13</sub>H<sub>11</sub>N<sub>3</sub>O<sub>3</sub>Cl [M+H]<sup>+</sup>, 292.0484; found: 292.0489

**IR:** (ATR, neat, cm<sup>-1</sup>) = 1771 (m), 1708 (s), 1451 (m), 1394 (w), 1269 (w), 1234 (w), 1200 (w), 1171 (w), 1033 (w), 963 (m), 852 (m), 769 (w), 734 (w), 720 (w), 705 (w), 580 (m), 456 (w)

**m.p.** = 195 – 196 °C

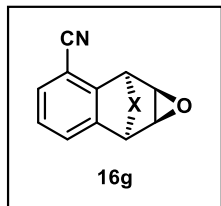

**2-methyl-1,3-dioxo-2,3,5,10-tetrahydro-1H-5,10-[2,3]epoxireno[1,2,4]triazolo[1,2-b]phthalazine-6-carbonitrile (16g):**

Following **General Procedure B** (1.0 mmol scale), the title compound was isolated by flash chromatography (SiO<sub>2</sub>, hexanes:ethyl acetate = 5:1 to 1:1) as a white solid (212 mg, 6:1 d.r., 75%).

**R<sub>f</sub>** = 0.3 (SiO<sub>2</sub>, hexanes:ethyl acetate = 1:1, UV)

**<sup>1</sup>H NMR:** (500 MHz, CDCl<sub>3</sub>) δ 7.71 (dd, *J* = 7.7, 1.4 Hz, 1H), 7.58 – 7.44 (m, 2H), 6.05 (d, *J* = 4.5 Hz, 1H), 5.72 (d, *J* = 4.5 Hz, 1H), 3.97 (dt, *J* = 23.8, 4.4 Hz, 2H), 2.84 (s, 3H)

**<sup>13</sup>C NMR:** (126 MHz, CDCl<sub>3</sub>) δ 157.0, 156.7, 133.2, 133.0, 131.2, 130.3, 128.8, 115.6, 109.2, 57.2, 55.6, 44.0, 43.9, 25.7

**HRMS:** (ESI-TOF, *m/z*) calculated for C<sub>14</sub>H<sub>11</sub>N<sub>4</sub>O<sub>3</sub> [M+H]<sup>+</sup>, 283.0826; found: 283.0833

**IR:** (ATR, neat, cm<sup>-1</sup>) = 3021 (w), 2231 (w), 1713 (s), 1448 (s), 1392 (s), 1272 (w), 1243 (w), 1196 (m), 1178 (m), 1113 (w), 1032 (w), 965 (m), 849 (m), 764 (s), 702 (m), 598 (m), 533 (m)

**m.p.** = 212 °C (decomp.)

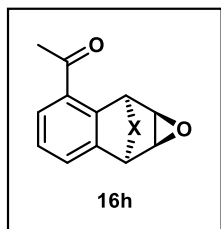

**6-acetyl-2-methyl-5,10-dihydro-1H-5,10-[2,3]epoxireno[1,2,4]triazolo[1,2-b]phthalazine-1,3(2H)-dione (16h):**

Following **General Procedure B** (1.0 mmol scale), the title compound was isolated by flash chromatography (SiO<sub>2</sub>, hexanes:ethyl acetate = 5:1 to 1:1) as a white solid (189 mg, 5.5:1 d.r., 63%).

**R<sub>f</sub>** = 0.2 (SiO<sub>2</sub>, hexanes:ethyl acetate = 1:1, UV)

**<sup>1</sup>H NMR:** (500 MHz, CDCl<sub>3</sub>) δ 7.86 (dd, *J* = 8.0, 1.1 Hz, 1H), 7.49 (t, *J* = 7.6 Hz, 1H), 7.40 (dd, *J* = 7.6, 1.1 Hz, 1H), 6.91 (d, *J* = 4.4 Hz, 1H), 5.67 (d, *J* = 4.4 Hz, 1H), 3.96 (t, *J* = 4.4 Hz, 1H), 3.90 (t, *J* = 4.4 Hz, 1H), 2.82 (d, *J* = 0.8 Hz, 3H), 2.63 (d, *J* = 0.8 Hz, 3H)

**<sup>13</sup>C NMR:** (126 MHz, CDCl<sub>3</sub>) δ 199.4, 157.1, 156.5, 133.4, 131.5, 130.39, 130.35, 129.3, 128.5, 57.5, 53.6, 44.0, 43.9, 28.7, 25.6

**HRMS:** (ESI-TOF, *m/z*) calculated for C<sub>15</sub>H<sub>14</sub>N<sub>3</sub>O<sub>4</sub> [M+H]<sup>+</sup>, 300.0979; found: 300.0974

**IR:** (ATR, neat, cm<sup>-1</sup>) 3051 (w), 2954 (w), 2253 (w), 1771 (m), 1702 (s), 1587 (w), 1447 (m), 1394 (m), 1358 (w), 1261 (m), 1201 (m), 1131 (w), 1034 (w), 1018 (w), 962 (m), 912 (m), 853 (m), 709 (m), 727 (s), 647 (w), 600 (w), 509 (w).

**m.p.** = 159 – 161 °C

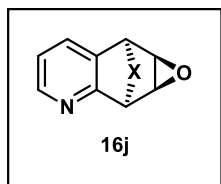

**8-methyl-5,11-dihydro-7H-5,11-[2,3]epoxirenopyrido[2,3-d][1,2,4]triazolo[1,2-a]pyridazine-7,9(8H)-dione (16j):**

Following **General Procedure A** (1.0 mmol scale), the title compound was isolated by flash chromatography (SiO<sub>2</sub>, hexanes:ethyl acetate = 3:1 to 1:2) as an off-white solid (172 mg, 5:1 d.r., 67%).

**R<sub>f</sub>** = 0.2 (SiO<sub>2</sub>, hexanes:ethyl acetate = 1:2, UV)

**<sup>1</sup>H NMR:** (500 MHz, CDCl<sub>3</sub>) δ 8.58 (d, *J* = 5.1 Hz, 1H), 7.59 (d, *J* = 7.6 Hz, 1H), 7.35 (dd, *J* = 7.6, 5.1 Hz, 1H), 5.84 (dd, *J* = 4.6, 1.1 Hz, 1H), 5.73 (dd, *J* = 4.6, 1.1 Hz, 1H), 4.07 – 3.86 (m, 2H), 2.85 (s, 3H).

**<sup>13</sup>C NMR:** (126 MHz, CDCl<sub>3</sub>) δ 156.9, 156.4, 150.6, 150.2, 132.2, 125.1, 124.8, 59.2, 56.7, 44.4, 44.0, 25.7.

**HRMS:** (ESI-TOF, *m/z*) calculated for C<sub>12</sub>H<sub>11</sub>N<sub>4</sub>O<sub>3</sub> [M+H]<sup>+</sup>, 259.0826 found: 259.0826.

**IR:** (ATR, neat, cm<sup>-1</sup>): 1764 (m), 1694 (s), 1577 (w), 1448 (m), 1395 (m), 1209 (w), 1118 (w), 1035 (w), 964 (w), 809 (w), 757 (m), 556 (m).

**m.p.** = 189 – 191 °C

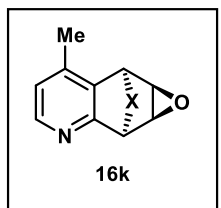

**4,8-dimethyl-5,11-dihydro-7H-5,11-[2,3]epoxirenopyrido[2,3-d][1,2,4]triazolo[1,2-a]pyridazine-7,9(8H)-dione (16k):**

Following **General Procedure A** (1.0 mmol scale), the title compound was isolated by flash chromatography (SiO<sub>2</sub>, hexanes:ethyl acetate = 3:1 to 1:2) as an off-white solid (197 mg, >20:1 d.r., 72%).

**R<sub>f</sub>** = 0.3 (SiO<sub>2</sub>, hexanes:ethyl acetate = 1:2, UV)

**<sup>1</sup>H NMR:** (500 MHz, CDCl<sub>3</sub>) δ 8.40 (d, *J* = 5.3 Hz, 1H), 7.16 (d, *J* = 5.3 Hz, 1H), 5.94 (d, *J* = 4.3 Hz, 1H), 5.79 (d, *J* = 4.3 Hz, 1H), 3.98 – 3.91 (m, 2H), 2.85 (s, 3H), 2.43 (s, 3H).

**<sup>13</sup>C NMR:** (126 MHz, CDCl<sub>3</sub>) δ 157.4, 156.6, 150.0, 149.7, 142.6, 126.3, 124.4, 59.6, 53.4, 44.4, 43.9, 25.7, 17.6.

**HRMS:** (ESI-TOF, *m/z*) calculated for C<sub>13</sub>H<sub>13</sub>N<sub>4</sub>O<sub>3</sub> [M+H]<sup>+</sup>, 273.0982 found: 273.0986.

**IR:** (ATR, neat, cm<sup>-1</sup>) 1764 (m), 1698 (s), 1593 (m), 1447 (m), 1400 (m), 1204 (w), 1032 (w), 963 (m), 921 (w), 870 (w), 851 (m), 766 (m), 754 (m), 710 (w), 634 (w), 591 (w), 517 (w), 490 (w).

**m.p.** = 220 – 223 °C

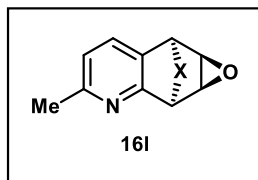

**2,8-dimethyl-5,11-dihydro-7H-5,11-[2,3]epoxirenopyrido[2,3-d][1,2,4]triazolo[1,2-a]pyridazine-7,9(8H)-dione (16l):**

Following **General Procedure A** (1.0 mmol scale), the title compound was isolated by flash chromatography (SiO<sub>2</sub>, hexanes:ethyl acetate = 3:1 to 1:2) as an off-white solid (171 mg, 8:1 d.r., 63%).

**R<sub>f</sub>** = 0.4 (SiO<sub>2</sub>, hexanes:ethyl acetate = 1:2, UV)

**<sup>1</sup>H NMR:** (500 MHz, CDCl<sub>3</sub>) δ 7.44 (d, *J* = 7.7 Hz, 1H), 7.16 (d, *J* = 7.7 Hz, 1H), 5.75 (d, *J* = 4.5 Hz, 1H), 5.68 (d, *J* = 4.5 Hz, 1H), 3.92 (t, *J* = 4.4 Hz, 1H), 3.88 (t, *J* = 4.4 Hz, 1H), 2.83 (s, 3H), 2.53 (s, 3H).

**<sup>13</sup>C NMR:** (126 MHz, CDCl<sub>3</sub>) δ 159.9, 156.8, 156.3, 149.5, 132.3, 124.1, 122.0, 59.2, 56.4, 44.4, 43.9, 25.6, 24.5.

**HRMS:** (ESI-TOF, *m/z*) calculated for C<sub>13</sub>H<sub>13</sub>N<sub>4</sub>O<sub>3</sub> [M+H]<sup>+</sup>, 273.0982 found: 273.0986.

**IR:** (ATR, neat, cm<sup>-1</sup>) 1772 (m), 1702 (s), 1599 (m), 1448 (w), 1394 (w), 1273 (w), 1196 (w), 1032 (w), 986 (w), 960 (m), 911 (m), 870 (w), 766 (w), 725 (m), 546 (m), 526 (w).

**m.p.** = 214 – 216 °C

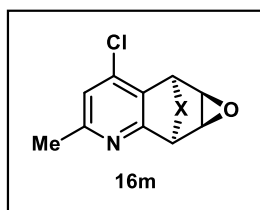

**4-chloro-2,8-dimethyl-5,11-dihydro-7H-5,11-[2,3]epoxirenopyrido[2,3-d][1,2,4]triazolo[1,2-a]pyridazine-7,9(8H)-dione (16m):**

Following **General Procedure A** (1.0 mmol scale), the title compound was isolated by flash chromatography (SiO<sub>2</sub>, hexanes:ethyl acetate = 3:1 to 1:2) as an off-white solid (180 mg, >20:1 d.r., 59%).

**R<sub>f</sub>** = 0.5 (SiO<sub>2</sub>, hexanes:ethyl acetate = 1:2, UV)

**<sup>1</sup>H NMR:** (500 MHz, CDCl<sub>3</sub>) δ 7.22 (s, 1H), 6.11 – 6.07 (m, 1H), 5.78 – 5.74 (m, 1H), 3.97 – 3.92 (m, 2H), 2.89 (s, 3H), 2.54 (s, 3H).

**<sup>13</sup>C NMR:** (126 MHz, CDCl<sub>3</sub>) δ 161.1, 156.6, 156.2, 150.7, 140.2, 124.5, 120.9, 59.0, 53.5, 44.3, 43.8, 25.8, 24.4.

**HRMS:** (ESI-TOF, *m/z*) calculated for C<sub>13</sub>H<sub>12</sub>N<sub>4</sub>O<sub>3</sub>Cl [M+H]<sup>+</sup>, 307.0592 found: 307.0601.

**IR:** (ATR, neat, cm<sup>-1</sup>) 1774 (m), 1710 (s), 1591 (m), 1566 (m), 1452 (m), 1395 (w), 1269 (w), 1231 (w), 1193 (m), 1034 (w), 962 (w), 898 (w), 854 (w), 768 (w), 753 (w), 706 (w), 646 (w), 602 (w).

**m.p.** = 269 – 270 °C (decomp.)

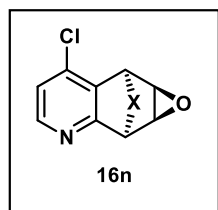

**4-chloro-8-methyl-5,11-dihydro-7H-5,11-[2,3]epoxirenopyrido[2,3-d][1,2,4]triazolo[1,2-a]pyridazine-7,9(8H)-dione (16n):**

Following **General Procedure A** (1.0 mmol scale), the title compound was isolated by flash chromatography (SiO<sub>2</sub>, hexanes:ethyl acetate = 3:1 to 1:2) as an off-white solid (246 mg, >20:1 d.r., 84%)

**R<sub>f</sub>** = 0.5 (SiO<sub>2</sub>, hexanes:ethyl acetate = 1:2, UV)

**<sup>1</sup>H NMR:** (500 MHz, CDCl<sub>3</sub>) δ 8.46 (d, *J* = 5.5 Hz, 1H), 7.38 (d, *J* = 5.5 Hz, 1H), 6.15 (dq, *J* = 3.0, 1.1 Hz, 1H), 5.93 – 5.75 (m, 1H), 4.04 – 3.90 (m, 2H), 2.89 (s, 3H)

**<sup>13</sup>C NMR:** (126 MHz, CDCl<sub>3</sub>) δ 156.6, 156.3, 151.5, 151.0, 140.3, 125.4, 124.0, 59.0, 53.6, 44.2, 43.8, 25.8.

**HRMS:** (ESI-TOF, m/z) calculated for C<sub>12</sub>H<sub>10</sub>N<sub>4</sub>O<sub>3</sub>Cl [M+H]<sup>+</sup>, 293.0436 found: 293.0448.

**IR:** (ATR, neat, cm<sup>-1</sup>) 1768 (m), 1705 (s), 1578 (w), 1446 (m), 1403 (m), 1227 (w), 1201 (m), 1039 (w), 978 (w), 964 (m), 921 (w), 852 (m), 766 (m), 722 (m), 591 (w), 591 (m).

**m.p.** = 218 – 221 °C (decomp.)

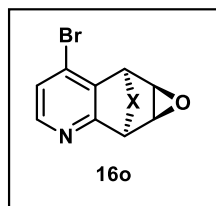

**4-bromo-8-methyl-5,11-dihydro-7H-5,11-[2,3]epoxirenopyrido[2,3-d][1,2,4]triazolo[1,2-a]pyridazine-7,9(8H)-dione (16o):**

Following **General Procedure A** (1.0 mmol scale), the title compound was isolated by flash chromatography (SiO<sub>2</sub>, hexanes:ethyl acetate = 3:1 to 1:2) as an off-white solid (285 mg, >20:1 d.r., 85%).

**R<sub>f</sub>** = 0.5 (SiO<sub>2</sub>, hexanes:ethyl acetate = 1:2, UV)

**<sup>1</sup>H NMR:** (500 MHz, CDCl<sub>3</sub>) δ 8.36 (d, *J* = 5.5 Hz, 1H), 7.54 (d, *J* = 5.5 Hz, 1H), 6.14 – 6.09 (m, 1H), 5.84 – 5.79 (m, 1H), 4.01 – 3.95 (m, 2H), 2.89 (s, 3H).

**<sup>13</sup>C NMR:** (126 MHz, CDCl<sub>3</sub>) δ 156.6, 156.3, 151.1, 150.9, 130.2, 128.5, 126.3, 59.1, 55.8, 44.2, 43.8, 25.8.

**HRMS:** (ESI-TOF, m/z) calculated for C<sub>12</sub>H<sub>10</sub>N<sub>4</sub>O<sub>3</sub>Br [M+H]<sup>+</sup>, 336.9931 found: 336.9948.

**IR:** (ATR, neat, cm<sup>-1</sup>) 1771(m), 1711(s), 1556 (m), 1456 (m), 1396 (m), 1229 (m), 1200 (m), 1035 (w), 963(m), 851(w), 765(m), 706 (w), 586 (w), 522(w).

**m.p.** = 253 – 254 °C with decomposition

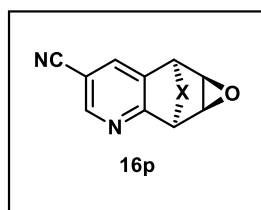

**8-methyl-7,9-dioxo-5,8,9,11-tetrahydro-7H-5,11-[2,3]epoxirenopyrido[2,3-d][1,2,4]triazolo[1,2-a]pyridazine-3-carbonitrile (16p):**

Following **General Procedure A** (1.0 mmol scale), the title compound was isolated by flash chromatography (SiO<sub>2</sub>, hexanes:ethyl acetate = 3:1 to 1:2) as an off-white solid (253 mg, 12:1 d.r., 89%).

**R<sub>f</sub>** = 0.5 (SiO<sub>2</sub>, hexanes:ethyl acetate = 1:2, UV)

**<sup>1</sup>H NMR:** (500 MHz, CDCl<sub>3</sub>) δ 8.86 (d, *J* = 1.9 Hz, 1H), 7.86 (d, *J* = 1.9 Hz, 1H), 5.89 (d, *J* = 4.6 Hz, 1H), 5.79 (d, *J* = 4.6 Hz, 1H), 4.03 (m, 2H), 2.88 (s, 3H)

**<sup>13</sup>C NMR:** (126 MHz, CDCl<sub>3</sub>) δ 156.5, 156.0, 153.7, 153.6, 135.0, 125.4, 115.8, 111.2, 58.8, 55.9, 44.3, 43.8, 25.9.

**HRMS:** (ESI-TOF, m/z) calculated for C<sub>13</sub>H<sub>10</sub>N<sub>5</sub>O<sub>3</sub> [M+H]<sup>+</sup>, 284.0778 found: 284.0784.

**IR:** (ATR, neat,  $\text{cm}^{-1}$ ) 2236 (w), 1776(m), 1710 (s), 1456 (m), 1394 (m), 1210(w), 1035 (w), 967 (w), 914 (w), 848 (w), 766 (w), 728 (m), 646 (w), 593 (w), 544 (w), 525 (w).

**m.p.** = 239 – 241  $^{\circ}\text{C}$  (decomp.)

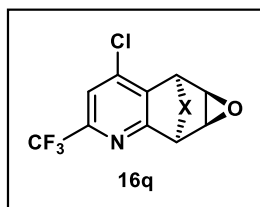

**4-chloro-8-methyl-2-(trifluoromethyl)-5,11-dihydro-7H-5,11-[2,3]epoxirenopyrido[2,3-d][1,2,4]triazolo[1,2-a]pyridazine-7,9(8H)-dione (16q):**

1.05 equivalents (243 mg, 1.05 mmol) of arene was used. With a slight modification to **General Procedure A** (1.0 mmol), the title compound was isolated by flash chromatography ( $\text{SiO}_2$ , hexanes:ethyl acetate = 3:1 to 1:2) as an off-white solid (277 mg, >20:1 d.r., 72%).

**R<sub>f</sub>** = 0.7 ( $\text{SiO}_2$ , hexanes:ethyl acetate = 1:2, UV)

**$^1\text{H}$  NMR:** (500 MHz,  $\text{CDCl}_3$ )  $\delta$  7.77 (s, 1H), 6.19 (dd,  $J$  = 3.4, 1.7 Hz, 1H), 5.91 (dd,  $J$  = 3.4, 1.7 Hz, 1H), 4.03 (m, 2H), 2.91 (s, 3H)

**$^{13}\text{C}$  NMR:** (126 MHz,  $\text{CDCl}_3$ )  $\delta$  156.2, 155.7, 152.0, 149.6 (q,  $J$ =36.0) , 141.7, 127.0, 122.7 (q,  $J$  = 2.9 Hz), 120.6 (q,  $J$  = 275.0 Hz), 58.4, 53.1, 44.1, 43.7, 25.9.

**$^{19}\text{F}$  NMR:** (471 MHz,  $\text{CDCl}_3$ )  $\delta$  -67.65.

**HRMS:** (ESI-TOF,  $m/z$ ) calculated for  $\text{C}_{13}\text{H}_9\text{N}_4\text{O}_3\text{F}_3\text{Cl}$   $[\text{M}+\text{H}]^+$ , 361.0310 found: 361.0310.

**IR:** (ATR, neat,  $\text{cm}^{-1}$ ) 1779 (m), 1707 (s), 1578 (w), 1452 (m), 1394 (w), 1347 (m), 1192 (m), 1108 (w), 964 (w), 866 (w), 845 (w), 767 (w), 754 (w), 735 (m), 723 (m).

**m.p.** = 223 – 225  $^{\circ}\text{C}$

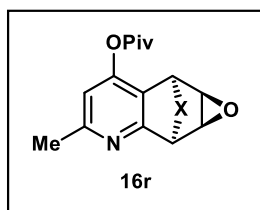

**2,8-dimethyl-7,9-dioxo-5,8,9,11-tetrahydro-7H-5,11-[2,3]epoxirenopyrido[2,3-d][1,2,4]triazolo[1,2-a]pyridazin-4-yl pivalate (16r):**

Following **general procedure A** (1.0 mmol scale), the title compound was isolated by flash chromatography ( $\text{SiO}_2$ , hexanes:ethyl acetate = 3:1 to 1:2) as an off-white solid (185 mg, 0.568 mmol, >20:1 d.r., 50%).

**R<sub>f</sub>** = 0.5 ( $\text{SiO}_2$ , hexanes:ethyl acetate = 1:2, UV)

**$^1\text{H}$  NMR:** (500 MHz,  $\text{CDCl}_3$ )  $\delta$  7.06 (s, 1H), 5.80 – 5.73 (m, 2H), 3.97 – 3.90 (m, 2H), 2.87 (s, 3H), 2.56 (s, 3H), 1.42 (s, 9H).

**$^{13}\text{C}$  NMR:** (126 MHz,  $\text{CDCl}_3$ )  $\delta$  175.6, 161.6, 156.8, 156.4, 153.0, 151.5, 117.4, 114.5, 59.0, 51.9, 44.4, 43.9, 39.8, 27.2, 25.8, 24.7.

**IR:** (ATR, neat,  $\text{cm}^{-1}$ ) 2977 (w), 1764 (m), 1714 (s), 1587 (m), 1454 (m), 1396 (w), 1344 (w), 1095 (m), 961 (w), 731 (w), 533 (w), 498 (w).

**HRMS:** (ESI-TOF,  $m/z$ ) calculated for  $C_{18}H_{21}N_4O_5$   $[M+H]^+$ , 373.1507 found: 373.1506.

**m.p.** = 237 – 238 °C

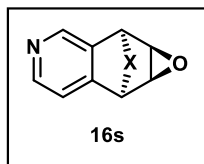

**2-methyl-5,10-dihydro-1H-5,10-[2,3]epoxirenopyrido[3,4-d][1,2,4]triazolo[1,2-a]pyridazine-1,3(2H)-dione (16s):**

Following **General Procedure A** (1.0 mmol scale), the title compound was isolated by flash chromatography ( $SiO_2$ , hexanes:ethyl acetate = 3:1 to 1:2) as an off-white solid (187mg, 5:1 d.r., 72%).

**R<sub>f</sub>** = 0.2 ( $SiO_2$ , hexanes:ethyl acetate = 1:2, UV)

**<sup>1</sup>H NMR:** (500 MHz,  $CDCl_3$ )  $\delta$  8.71 (s, 1H), 8.52 (s, 1H), 7.21 (d,  $J$  = 4.7 Hz, 1H), 5.74 (d,  $J$  = 4.4 Hz, 1H), 5.67 (d,  $J$  = 4.4 Hz, 1H), 3.93 (m, 2H), 2.82 (s, 3H).

**<sup>13</sup>C NMR:** (126 MHz,  $CDCl_3$ )  $\delta$  156.8, 156.7, 151.8, 144.7, 137.9, 125.4, 119.0, 56.5, 55.4, 44.3, 43.8, 25.7.

**HRMS:** (ESI-TOF,  $m/z$ ) calculated for  $C_{12}H_{11}N_4O_3$   $[M+H]^+$ , 259.0826 found: 259.0828.

**IR:** (ATR, neat,  $cm^{-1}$ ): 3059 (w), 1709 (s), 1609 (w), 1456 (m), 1395 (m), 1269 (w), 1207 (w), 1097 (w), 692 (w), 766 (w), 733 (w), 560 (w)

**m.p.** = 226 °C (decomp.)

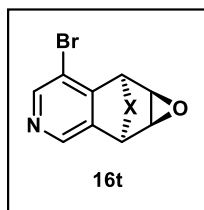

**9-bromo-2-methyl-5,10-dihydro-1H-5,10-[2,3]epoxirenopyrido[3,4-d][1,2,4]triazolo[1,2-a]pyridazine-1,3(2H)-dione (16t):**

Following **General Procedure A** (1.0 mmol scale), the title compound was isolated by flash chromatography ( $SiO_2$ , hexanes:ethyl acetate = 3:1 to 1:2) as an off-white solid (223 mg, >20:1 d.r., 66%).

**R<sub>f</sub>** = 0.4 ( $SiO_2$ , hexanes:ethyl acetate = 1:2, UV)

**<sup>1</sup>H NMR:** (500 MHz,  $CDCl_3$ )  $\delta$  8.81 (s, 1H), 8.42 (s, 1H), 6.06 (d,  $J$  = 4.5 Hz, 1H), 5.73 (d,  $J$  = 4.5 Hz, 1H), 3.97 (m, 2H), 2.87 (s, 3H).

**<sup>13</sup>C NMR:** (126 MHz,  $CDCl_3$ )  $\delta$  156.7, 156.5, 153.2, 143.2, 138.2, 126.8, 117.3, 55.8, 55.2, 44.1, 43.6, 25.8.

**HRMS:** (ESI-TOF,  $m/z$ ) calculated for  $C_{12}H_{10}N_4O_3Br$   $[M+H]^+$ , 336.9931 found: 336.9940.

**IR:** (ATR, neat,  $cm^{-1}$ ) 1775 (m), 1706 (s), 1595 (w), 1553 (w), 1449 (m), 1393 (w), 1192 (m), 1159 (w), 1101 (w), 1034 (w), 963 (w), 909 (w), 847 (w), 766 (w), 727 (m), 576 (m), 512(w).

**m.p.** = 243 °C (decomp.)

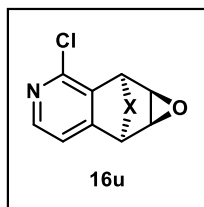

**6-chloro-2-methyl-5,10-dihydro-1H-5,10-[2,3]epoxirenopyrido[3,4-d][1,2,4]triazolo[1,2-a]pyridazine-1,3(2H)-dione (16u):**

Following **General Procedure A** (1.0 mmol scale), the title compound was isolated by flash chromatography (SiO<sub>2</sub>, hexanes:ethyl acetate = 3:1 to 1:2) as an off-white solid (166 mg, >20:1 d.r., 57%).

**R<sub>f</sub>**=0.4 (SiO<sub>2</sub>, hexanes:ethyl acetate = 1:2, UV)

**<sup>1</sup>H NMR:** (500 MHz, CDCl<sub>3</sub>) δ 8.45 (d, *J* = 5.6 Hz, 1H), 7.38 (d, *J* = 5.6 Hz, 1H), 6.24 – 5.99 (m, 1H), 5.85 – 5.77 (m, 1H), 4.07 – 3.89 (m, 2H), 2.89 (s, 3H)

**<sup>13</sup>C NMR:** (126 MHz, CDCl<sub>3</sub>) δ 156.7, 156.6, 151.3, 146.9, 140.8, 124.5, 118.3, 56.4, 54.7, 44.0, 43.5, 25.9.

**HRMS:** (ESI-TOF, *m/z*) calculated for C<sub>12</sub>H<sub>10</sub>N<sub>4</sub>O<sub>3</sub>Cl [M+H]<sup>+</sup>, 293.0436 found: 293.0437.

**IR:** (ATR, neat, cm<sup>-1</sup>): 1773 (w), 1710 (s), 1601 (w), 1560 (w), 1452 (m), 1412 (w), 1395 (w), 1189 (w), 964 (w), 855 (w), 767 (w), 733 (w), 585 (w), 519 (w).

**m.p.** = 238 – 239 °C

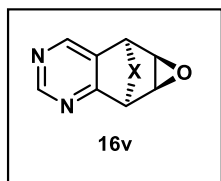

**8-methyl-5,11-dihydro-7H-5,11-[2,3]epoxirenopyrimido[4,5-d][1,2,4]triazolo[1,2-a]pyridazine-7,9(8H)-dione (16v):**

Following **General Procedure A** (1.0 mmol scale), the title compound was isolated by flash chromatography (SiO<sub>2</sub>, hexanes:ethyl acetate = 3:1 to 1:2) as an off-white solid (186 mg, >20:1 d.r., 72%).

**R<sub>f</sub>**=0.3 (SiO<sub>2</sub>, hexanes:ethyl acetate = 1:2, UV)

**<sup>1</sup>H NMR:** (500 MHz, CDCl<sub>3</sub>) δ 9.25 (s, 1H), 8.64 (s, 1H), 5.80 (m, 2H), 4.06 – 3.97 (m, 2H), 2.88 (s, 3H).

**<sup>13</sup>C NMR:** (126 MHz, CDCl<sub>3</sub>) δ 160.2, 158.1, 156.6, 156.0, 151.5, 122.9, 58.2, 54.4, 44.4, 43.5, 25.9.

**HRMS:** (ESI-TOF, *m/z*) calculated for C<sub>11</sub>H<sub>10</sub>N<sub>5</sub>O<sub>3</sub> [M+H]<sup>+</sup>, 260.0778 found: 260.0784.

**IR:** (ATR, neat, cm<sup>-1</sup>) 1774 (m), 1709 (s), 1594 (w), 1568 (m), 1458 (w), 1395 (w), 1218 (w), 965 (w), 848 (w), 766 (w), 677 (w), 565 (w).

**m.p.** = 217 – 218 °C



### 3-6.3 General procedure for the cycloreversion to benzoxepines:

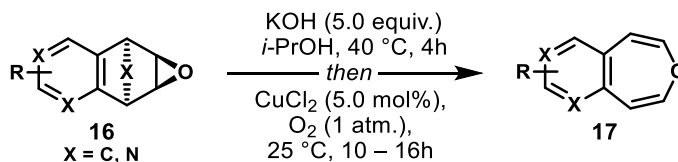

To a vial containing finely ground KOH (156 mg, 5.0 equiv., 90 wt%), and substrate (0.500 mmol, 1.0 equiv.) under nitrogen was added *i*-PrOH (5.0 mL, 0.1 M) and degassed with nitrogen/sonication for 15 min. The reaction was heated to 40 °C with vigorous stirring (700 rpm) and progress was monitored by TLC in 30 min intervals. Upon completion, the reaction was cooled in an ice bath and H<sub>2</sub>O (5.0 mL) were added. AcOH is then carefully added dropwise until pH = 5, upon which gas evolution is observed. CuCl<sub>2</sub> dihydrate (4.3 mg, 25 μmol, 0.05 mol%) was then added as a solid, followed by sparging with oxygen, and the reaction was stirred for 10-16 h under an atmosphere of oxygen (balloon).

#### **Work-up for hydrocarbon arene-derived benzoxepines:**

Upon completion, the reaction was partitioned between diethyl ether (10 mL) and saturated brine (10 mL) and the organic layer was extracted with ether (3 × 10 mL). The combined organics were washed with brine, dried over MgSO<sub>4</sub>, filtered, and concentrated under vacuum and isolated by flash chromatography (SiO<sub>2</sub>, hexanes:ethyl acetate mixtures). Compounds are volatile; thus, execute caution when putting the compound under vacuum.

#### **Work-up for heteroarene-derived benzoxepines:**

Upon completion, the reaction was poured into saturated aqueous NaHCO<sub>3</sub> (10 mL). The aqueous phase was extracted with ethyl acetate (3 × 10 mL). The combined organics were then washed with brine, dried over MgSO<sub>4</sub>, filtered, and concentrated under vacuum and isolated by flash chromatography (SiO<sub>2</sub>, hexanes:ethyl acetate mixtures). Compounds are volatile; thus, caution is needed upon drying the compound under reduced pressure.

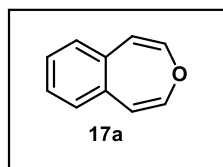

#### **3-Benzoxepin (benzo[d]oxepine, 17a):**

Following the general procedure (0.5 mmol scale), the title compound was isolated by flash chromatography (SiO<sub>2</sub>, hexanes:ethyl acetate = 1 to 10:1) as a bright yellow solid (59 mg, 82%).

**R<sub>f</sub>** = 0.4 (SiO<sub>2</sub>, hexanes, UV)

**<sup>1</sup>H NMR:** (500 MHz, CDCl<sub>3</sub>) δ 6.90 (dd, *J* = 5.6, 3.3 Hz, 2H), 6.63 (dd, *J* = 5.5, 3.4 Hz, 2H), 5.67 (d, *J* = 7.4 Hz, 2H), 5.06 (d, *J* = 7.4 Hz, 2H).

**<sup>13</sup>C NMR:** (126 MHz, CDCl<sub>3</sub>) δ 146.1, 136.0, 129.1, 127.8, 113.3.

**HRMS:** (EI-TOF, *m/z*) calcd. For C<sub>10</sub>H<sub>8</sub>O [M]<sup>+</sup>, 144.05697; found: 144.05719.

**IR:** (ATR, neat,  $\text{cm}^{-1}$ ) = 3050 (w), 2926 (w), 1658 (m), 1635 (m), 1496 (m), 1438 (m), 1316 (s), 1254 (m), 1211 (m), 1118 (m), 1049 (s), 921 (m), 847 (m), 770 (s).

**m.p.** = 81 – 82 °C

*The analytical data were in accordance with previously reported values.*<sup>8</sup>

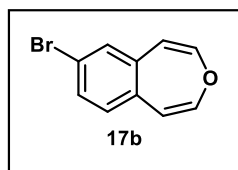

**7-bromobenzo[d]oxepine (17b):**

Following the general procedure (0.5 mmol scale), the title compound was isolated by flash chromatography ( $\text{SiO}_2$ , hexanes:ethyl acetate = 1:0 to 10:1) as a yellow solid (86 mg, 77%).

**R<sub>f</sub>** = 0.3 ( $\text{SiO}_2$ , hexanes:ethyl acetate = 9:1, UV)

**<sup>1</sup>H NMR:** (500 MHz,  $\text{CD}_3\text{CN}$ )  $\delta$  7.08 (dd,  $J$  = 8.1, 2.1 Hz, 1H), 6.86 (d,  $J$  = 2.1 Hz, 1H), 6.59 (d,  $J$  = 8.1 Hz, 1H), 5.73 (m, 2H), 5.10 (m, 2H)

**<sup>13</sup>C NMR:** (126 MHz,  $\text{CD}_3\text{CN}$ )  $\delta$  148.2, 147.4, 139.0, 135.9, 132.4, 131.7, 131.4, 121.8, 113.0, 112.5

**HRMS:** (EI,  $m/z$ ) calcd. For  $\text{C}_{10}\text{H}_7\text{OBr}$   $[\text{M}]^+$ , 221.9675; found: 221.9674

**IR:** (ATR, neat,  $\text{cm}^{-1}$ ) 1670 (m), 1634 (m), 1576 (w), 1491 (m), 1397 (m), 1367 (m), 1318 (m), 1254 (w), 1211 (m), 1130 (w), 1089 (w), 1049 (s), 888(w), 872 (w), 873 (m), 828 (m), 762 (m), 733 (w), 583 (w)

**m.p.** = 69 – 71 °C

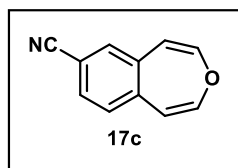

**Benzo[d]oxepine-7-carbonitrile (17c):**

Following the general procedure (0.5 mmol scale), the title compound was isolated by flash chromatography ( $\text{SiO}_2$ , hexanes:ethyl acetate = 1 to 10:1) as a yellow solid (69 mg, 82%).

**R<sub>f</sub>** = 0.5 ( $\text{SiO}_2$ , hexanes:ethyl acetate = 9:1, UV)

**<sup>1</sup>H NMR:** (500 MHz,  $\text{CD}_3\text{CN}$ )  $\delta$  7.24 (dd,  $J$  = 7.9, 1.7 Hz, 1H), 6.94 (d,  $J$  = 1.7 Hz, 1H), 6.75 (d,  $J$  = 7.9 Hz, 1H), 5.73 (m, 2H), 5.10 (m, 2H)

**<sup>13</sup>C NMR:** (126 MHz,  $\text{CD}_3\text{CN}$ )  $\delta$  149.6, 148.5, 141.8, 138.0, 132.8, 132.6, 130.4, 119.2, 112.5, 112.1, 111.8

**HRMS:** (ESI-TOF,  $m/z$ ) calcd. For  $\text{C}_{11}\text{H}_8\text{NO}$   $[\text{M}+\text{H}]^+$ , 170.600; found: 170.0606

**IR:** (ATR, neat,  $\text{cm}^{-1}$ ): 3073 (w), 2227 (m), 1671 (m), 1591 (m), 1498 (w), 1326 (m), 1257 (w), 1205 (w), 1053 (s), 901 (w), 844 (w), 651 (m)

**m.p.** = 83 – 84 °C

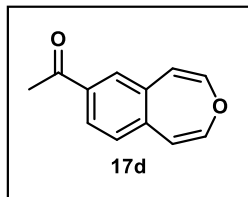

**1-(benzo[d]oxepin-7-yl)ethan-1-one (17d):**

Following the general procedure (0.5 mmol scale), the title compound was isolated by flash chromatography (SiO<sub>2</sub>, hexanes:ethyl acetate = 1 to 10:1) as a yellow solid (68 mg, 73%).

**R<sub>f</sub>** = 0.3 (SiO<sub>2</sub>, hexanes:ethyl acetate = 9:1, UV)

**<sup>1</sup>H NMR:** (500 MHz, CDCl<sub>3</sub>) δ 7.48 – 7.40 (m, 1H), 7.14 (d, *J* = 1.8 Hz, 1H), 6.64 (d, *J* = 7.8 Hz, 1H), 5.66 (m, 2H), 5.01 (m, 2H), 2.48 (s, 3H)

**<sup>13</sup>C NMR:** (126 MHz, CDCl<sub>3</sub>) δ 197.0, 148.0, 146.4, 141.1, 136.4, 136.3, 129.1, 128.51, 128.48, 112.4, 112.0, 25.6

**HRMS:** (ESI-TOF, *m/z*) calcd. For C<sub>12</sub>H<sub>11</sub>O<sub>2</sub> [M+H]<sup>+</sup>, 187.0754 found: 187.0756

**IR:** (ATR, neat, cm<sup>-1</sup>) 3346 (w), 1730 (w), 1675 (s), 1593 (m), 1566 (w), 1406 (w), 1356 (m), 1311 (m), 1273 (m), 1192 (w), 1147 (w), 1082 (w), 1049 (m), 972 (w), 933 (w), 838 (m), 763 (m), 636 (w), 570 (m).

**m.p.** = 71 – 74 °C (decomp.)

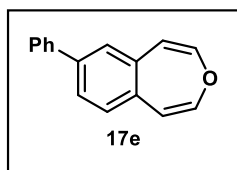

**7-phenylbenzo[d]oxepine (17e):**

Following the general procedure (0.5 mmol scale), the title compound was isolated by flash chromatography (SiO<sub>2</sub>, hexanes:ethyl acetate = 1 to 10:1) as a yellow solid (90 mg, 82%).

**R<sub>f</sub>** = 0.5 (SiO<sub>2</sub>, hexanes, UV)

**<sup>1</sup>H NMR:** (500 MHz, CDCl<sub>3</sub>) δ 7.53 – 7.48 (m, 2H), 7.40 (m, 2H), 7.35 – 7.30 (m, 1H), 7.13 (dd, *J* = 7.8, 2.0 Hz, 1H), 6.87 (d, *J* = 2.0 Hz, 1H), 6.70 (d, *J* = 7.8 Hz, 1H), 5.70 (m, 2H), 5.10 (m, 2H)

**<sup>13</sup>C NMR:** (126 MHz, CDCl<sub>3</sub>) δ 146.20, 146.17, 140.6, 140.2, 136.4, 135.0, 129.6, 128.9, 128.0, 127.6, 126.7, 126.3, 113.1, 112.8

**HRMS** (ESI-TOF, *m/z*) calcd. For C<sub>16</sub>H<sub>13</sub>O [M+H]<sup>+</sup>, 221.0961; found: 221.0956

**IR** (ATR, neat, cm<sup>-1</sup>): 3057 (w), 3037 (w), 1667 (m), 1562 (w), 1485(w), 1325 (m), 1264 (w), 1201 (w), 1051 (s), 892 (w), 849 (w), 691 (s)

**m.p.** = 91 – 92 °C

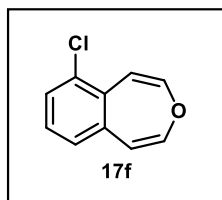

**6-chlorobenzo[d]oxepine (17f):**

Following the general procedure (0.5 mmol scale), the title compound was isolated by flash chromatography (SiO<sub>2</sub>, hexanes:ethyl acetate = 1 to 10:1) as a yellow oil (68 mg, 76%).

**R<sub>f</sub>** = 0.3 (SiO<sub>2</sub>, hexanes:ethyl acetate = 9:1, UV)

**<sup>1</sup>H NMR:** (500 MHz, CDCl<sub>3</sub>) δ 7.04 (dd, *J* = 7.8, 1.3 Hz, 1H), 6.90 (t, *J* = 7.8 Hz, 1H), 6.63 (dd, *J* = 7.8, 1.3 Hz, 1H), 5.91 (d, *J* = 7.3 Hz, 1H), 5.85 (d, *J* = 7.0 Hz, 1H), 5.74 (d, *J* = 7.3 Hz, 1H), 5.25 (d, *J* = 7.0 Hz, 1H).

**<sup>13</sup>C NMR:** (126 MHz, CDCl<sub>3</sub>) δ 148.0, 147.9, 137.9, 133.3, 133.0, 128.6, 128.6, 127.8, 113.9, 110.5.

**HRMS:** (EI-TOF, *m/z*) calcd. For C<sub>10</sub>H<sub>7</sub>OCl [M]<sup>+</sup>, 178.01799; found: 178.01804.

**IR:** (ATR, neat, cm<sup>-1</sup>) = 3060 (w), 1667 (m), 1636 (m), 1466 (w), 1433 (s), 1299 (w), 1223 (w), 1080 (m), 1053 (s), 938 (m), 893 (w), 851 (w), 826 (w), 803 (w), 762 (s).

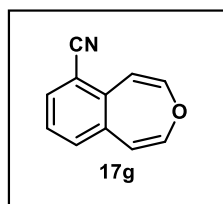

**Benzo[d]oxepine-6-carbonitrile (17g):**

Following the general procedure (0.5 mmol scale), the title compound was isolated by flash chromatography (SiO<sub>2</sub>, hexanes:ethyl acetate = 1 to 10:1) as a yellow solid (62 mg, 73%).

**R<sub>f</sub>** = 0.5 (SiO<sub>2</sub>, hexanes:ethyl acetate = 9:1, UV)

**<sup>1</sup>H NMR:** (500 MHz, CDCl<sub>3</sub>) δ 7.19 (dd, *J* = 7.7, 1.4 Hz, 1H), 6.97 (t, *J* = 7.7 Hz, 1H), 6.80 (dd, *J* = 7.7, 1.4 Hz, 1H), 5.84 (d, *J* = 7.5 Hz, 1H), 5.73 (d, *J* = 7.3 Hz, 1H), 5.53 (d, *J* = 7.5 Hz, 1H), 5.09 (d, *J* = 7.3 Hz, 1H).

**<sup>13</sup>C NMR:** (126 MHz, CDCl<sub>3</sub>) δ 149.9, 148.0, 139.5, 137.4, 132.8, 131.4, 128.1, 117.5, 112.7, 111.5, 109.8.

**HRMS:** (ESI-TOF, *m/z*) calcd. For C<sub>11</sub>H<sub>8</sub>NO [M+H]<sup>+</sup>, 170.0600; found: 170.0603.

**IR:** (ATR, neat, cm<sup>-1</sup>) = 3077 (w), 3010 (w), 2226 (m), 1672(s), 1634 (m), 1466 (m), 1449(m),

1312 (s), 1241 (m), 1093 (m), 1066 (m), 957 (m), 922 (m), 851 (m), 803(m), 767 (m).

**m.p.** = 81 – 84 °C

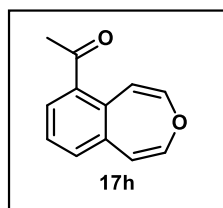

**1-(benzo[d]oxepin-6-yl)ethan-1-one (17h):**

Following the general procedure (0.5 mmol scale), the title compound was isolated by flash chromatography (SiO<sub>2</sub>, hexanes:ethyl acetate = 1 to 10:1) as a yellow oil (65 mg, 70%).

**R<sub>f</sub>** = 0.5 in (SiO<sub>2</sub>, hexanes:ethyl acetate = 9:1, UV)

**<sup>1</sup>H NMR:** (500 MHz, CDCl<sub>3</sub>) δ 7.25 (d, *J* = 5.7 Hz, 1H), 7.08 (t, *J* = 7.7 Hz, 1H), 6.89 (dd, *J* = 7.7, 1.3 Hz, 1H), 5.95 (m, 2H), 5.82 (d, *J* = 7.0 Hz, 1H), 5.40 (d, *J* = 7.0 Hz, 1H), 2.52 (s, 3H)

**<sup>13</sup>C NMR:** (126 MHz, CDCl<sub>3</sub>) δ 202.9, 148.6, 147.9, 139.0, 137.7, 133.9, 131.9, 127.3, 127.1, 114.5, 112.3, 30.6

**HRMS:** (ESI-TOF, *m/z*) calcd. For C<sub>12</sub>H<sub>10</sub>O [M]<sup>+</sup>, 186.06753; found: 186.06801

**IR:** (ATR, neat, cm<sup>-1</sup>) 3066 (w), 1678 (s), 1633 (m), 1444 (w), 1352 (m), 1260 (s), 1056(s), 1014 (m), 980 (m), 938 (m), 896 (w), 852 (w), 815 (m), 766 (s), 592 (w)

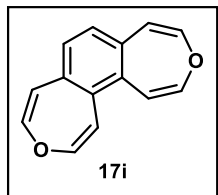

#### Benzo[1,2-d:3,4-d']bis(oxepine) (17i):

Epoxidation was telescoped using **General Procedure B** without purification. After extraction with ethyl acetate ( $3 \times 15$  mL), the organic extracts were combined and run through a plug of silica gel, and flushed with  $\text{CH}_2\text{Cl}_2$  (15 mL). The organic phase was then dried over  $\text{MgSO}_4$  and concentrated under reduced pressure. No flash chromatography was performed, and the crude mixture was immediately subjected to cycloreversion conditions. The title compound was isolated by flash chromatography ( $\text{SiO}_2$ , hexanes:ethyl acetate = 1 to 10:1) as a yellow solid (35 mg, 33%).

$R_f$  = 0.4 ( $\text{SiO}_2$ , hexanes, UV)

**$^1\text{H}$  NMR:** (500 MHz,  $\text{CDCl}_3$ )  $\delta$  6.55 (s, 2H), 6.00 (d,  $J$  = 7.0 Hz, 2H), 5.95 (d,  $J$  = 6.8 Hz, 2H), 5.47 (d,  $J$  = 7.0 Hz, 2H), 5.34 (d,  $J$  = 6.8 Hz, 2H)

**$^{13}\text{C}$  NMR:** (126 MHz,  $\text{CDCl}_3$ )  $\delta$  147.5, 147.3, 135.2, 133.3, 128.5, 114.7, 112.0

**HRMS:** (EI,  $m/z$ ) calculated for  $\text{C}_{14}\text{H}_{10}\text{O}_2$   $[\text{M}]^+$  calculated: 210.06753 found: 210.06800

**IR:** (ATR, neat,  $\text{cm}^{-1}$ ) 3052 (w), 1660 (m), 1632 (m), 1480 (w), 1401 (w), 1275 (m), 1121 (s), 978 (w), 950 (w), 854 (w), 759 (s), 738 (w)

**m.p.** = 83 – 86 °C

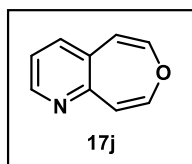

#### Oxepino[4,5-b]pyridine (17j):

Following the general procedure (0.5 mmol scale), the title compound was isolated by flash chromatography ( $\text{SiO}_2$ , hexanes:ethyl acetate = 10:1 to 2:1) as a yellow solid (90 mg, 82%).

$R_f$  = 0.5 ( $\text{SiO}_2$ , hexanes:ethyl acetate = 1:1, UV)

**$^1\text{H}$  NMR:** (500 MHz,  $\text{CDCl}_3$ )  $\delta$  8.05 (s, 1H), 6.84 (dd,  $J$  = 7.7, 1.5 Hz, 1H), 6.77 (dd,  $J$  = 7.7, 4.8 Hz, 1H), 5.81 (d,  $J$  = 7.7 Hz, 1H), 5.68 (d,  $J$  = 7.5 Hz, 1H), 5.28 (d,  $J$  = 7.7 Hz, 1H), 4.93 (d,  $J$  = 7.5 Hz, 1H).

**$^{13}\text{C}$  NMR:** (126 MHz,  $\text{CDCl}_3$ )  $\delta$  155.9, 149.0, 147.4, 147.1, 135.2, 132.9, 122.0, 114.9, 110.6.

**HRMS:** (ESI-TOF,  $m/z$ ) calcd. For  $\text{C}_9\text{H}_8\text{O}$   $[\text{M}+\text{H}]^+$ , 146.0600; found: 146.0600

**IR:** (ATR, neat,  $\text{cm}^{-1}$ ) 3046 (w), 1671 (m), 1634 (m), 1571 (m), 1451 (s), 1303 (w), 1271 (w), 1228 (w), 1121 (m), 1044 (w), 873 (w), 789 (w), 575 (w).

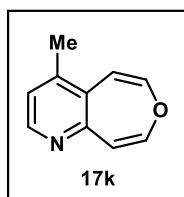

#### 4-methyloxepino[4,5-b]pyridine (17k):

Following the general procedure (0.5 mmol scale), the title compound was isolated by flash chromatography ( $\text{SiO}_2$ , hexanes:ethyl acetate = 10:1 to 2:1) as a yellow oil (59 mg, 74%).

$R_f$  = 0.3 ( $\text{SiO}_2$ , hexanes:ethyl acetate = 1:1, UV)

**<sup>1</sup>H NMR:** (500 MHz, CDCl<sub>3</sub>) δ 8.04 (d, *J* = 5.0 Hz, 1H), 6.72 (d, *J* = 5.0 Hz, 1H), 6.02 (d, *J* = 7.2 Hz, 1H), 5.95 (d, *J* = 7.2 Hz, 1H), 5.55 (d, *J* = 7.2 Hz, 1H), 5.36 (d, *J* = 7.2 Hz, 1H), 2.14 (s, 3H)

**<sup>13</sup>C NMR:** (126 MHz, CDCl<sub>3</sub>) δ 155.4, 150.1, 147.9, 147.5, 144.0, 131.3, 123.8, 116.5, 109.0, 19.3

**HRMS:** (ESI-TOF, *m/z*) calcd. For C<sub>10</sub>H<sub>10</sub>NO [M+H]<sup>+</sup>, 160.0757; found: 160.0776

**IR:** (ATR, neat, cm<sup>-1</sup>) 3052 (w), 2979 (w), 1668 (m), 1633 (m), 1581 (m), 1496 (s), 1264 (w), 1218 (w), 1109 (m), 1019 (w), 833 (w), 765 (w), 681 (w)

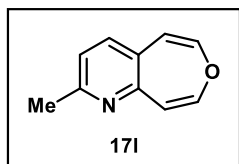

**2-methyloxepino[4,5-*b*]pyridine (17l):**

Following the general procedure (0.5 mmol scale), the title compound was isolated by flash chromatography (SiO<sub>2</sub>, hexanes:ethyl acetate = 10:1 to 2:1) as a yellow oil (62 mg, 78%).

**R<sub>f</sub>** = 0.3 (SiO<sub>2</sub>, hexanes:ethyl acetate = 1:1, UV)

**<sup>1</sup>H NMR:** (500 MHz, CDCl<sub>3</sub>) δ 6.78 (d, *J* = 7.7 Hz, 1H), 6.65 (d, *J* = 7.7 Hz, 1H), 5.84 (dd, *J* = 7.6, 1.8 Hz, 1H), 5.69 (dd, *J* = 7.4, 1.8 Hz, 1H), 5.31 (dd, *J* = 7.6, 2.0 Hz, 1H), 4.98 (dd, *J* = 7.4, 1.8 Hz, 1H), 2.35 (d, *J* = 1.8 Hz, 3H)

**<sup>13</sup>C NMR:** (126 MHz, CDCl<sub>3</sub>) δ 156.3, 155.1, 148.9, 146.4, 135.8, 129.8, 121.3, 115.4, 110.9, 24.0

**HRMS:** (ESI-TOF, *m/z*) calcd. For C<sub>10</sub>H<sub>10</sub>NO [M+H]<sup>+</sup>, 160.0757; found: 160.0763

**IR:** (ATR, neat, cm<sup>-1</sup>) 3052 (w), 1670 (m), 1634 (m), 1587 (m), 1469 (s), 1284 (w), 1213 (w), 1129 (m), 1044 (w), 835 (w), 759 (w), 614(w), 557 (w)

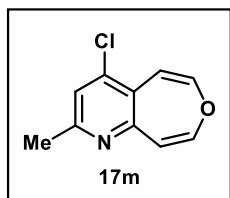

**4-chloro-2-methyloxepino[4,5-*b*]pyridine (17m):**

Following the general procedure (0.5 mmol scale), the title compound was isolated by flash chromatography (SiO<sub>2</sub>, hexanes:ethyl acetate = 10:1 to 2:1) as a yellow oil (70.2 mg, 0.36 mmol, 73%).

**R<sub>f</sub>** = 0.5 (SiO<sub>2</sub>, hexanes:ethyl acetate = 1:1, UV)

**<sup>1</sup>H NMR:** (500 MHz, CDCl<sub>3</sub>) δ 6.79 (s, 1H), 5.98 (d, *J* = 7.4 Hz, 1H), 5.89 (d, *J* = 7.3 Hz, 1H), 5.57 (d, *J* = 7.3 Hz, 1H), 5.44 (d, *J* = 7.4 Hz, 1H), 2.35 (s, 3H)

**<sup>13</sup>C NMR:** (126 MHz, CDCl<sub>3</sub>) δ 157.2, 156.4, 150.6, 148.1, 141.4, 127.6, 122.0, 115.6, 107.6, 23.9

**HRMS:** (ESI-TOF, *m/z*) calculated for C<sub>10</sub>H<sub>9</sub>NOCl [M+H]<sup>+</sup>, 194.0367 found: 194.0373

**IR:** (ATR, neat, cm<sup>-1</sup>): 3006 (w), 2921 (w), 1669(m), 1634 (m), 1572 (m), 1538 (m), 1443 (w), 1262 (w), 1048 (s), 955 (w), 808 (w)

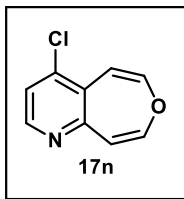

#### 4-chlorooxepino[4,5-*b*]pyridine (17n):

Following the general procedure (0.5 mmol scale), the title compound was isolated by flash chromatography (SiO<sub>2</sub>, hexanes:ethyl acetate = 10:1 to 2:1) as a yellow solid (65 mg, 72%).

$R_f$  = 0.7 (SiO<sub>2</sub>, hexanes:ethyl acetate = 1:1, UV)

**<sup>1</sup>H NMR:** (500 MHz, CDCl<sub>3</sub>)  $\delta$  7.98 (d,  $J$  = 5.4 Hz, 1H), 6.89 (d,  $J$  = 5.4 Hz, 1H), 5.96 (d,  $J$  = 7.5 Hz, 1H), 5.89 (d,  $J$  = 7.5 Hz, 1H), 5.56 (d,  $J$  = 7.5 Hz, 1H), 5.43 (d,  $J$  = 7.5 Hz, 1H)

**<sup>13</sup>C NMR:** (126 MHz, CDCl<sub>3</sub>)  $\delta$  157.3, 150.7, 148.9, 147.9, 141.1, 130.8, 122.9, 115.4, 107.2

**HRMS:** (ESI-TOF,  $m/z$ ) calcd. For C<sub>9</sub>H<sub>7</sub>ClO [M+H]<sup>+</sup>, 180.0211; found: 180.0198

**IR:** (ATR, neat, cm<sup>-1</sup>) 3083 (w), 1670 (m), 1634 (m), 1552 (w), 1438 (s), 1389 (w), 1302 (m), 1262 (w), 1199 (w), 1098 (m), 900 (w), 853 (w), 786 (w), 760 (w), 567 (w)

**m.p.** = 67 – 71 °C (decomp.)

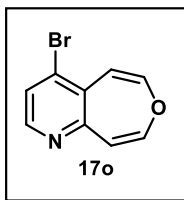

#### 4-bromooxepino[4,5-*b*]pyridine (17o):

Following the general procedure (0.5 mmol scale), the title compound was isolated by flash chromatography (SiO<sub>2</sub>, hexanes:ethyl acetate = 10:1 to 2:1) as a yellow solid (81 mg, 72%).

$R_f$  = 0.7 (SiO<sub>2</sub>, hexanes:ethyl acetate = 1:1, UV)

**<sup>1</sup>H NMR:** (500 MHz, CD<sub>3</sub>CN)  $\delta$  7.90 (d,  $J$  = 5.3 Hz, 1H), 7.20 (d,  $J$  = 5.3 Hz, 1H), 6.07 (d,  $J$  = 7.4 Hz, 1H), 6.01 (d,  $J$  = 7.3 Hz, 1H), 5.63 (dd,  $J$  = 7.3, 0.8 Hz, 1H), 5.48 (d,  $J$  = 7.4 Hz, 1H)

**<sup>13</sup>C NMR:** (126 MHz, CD<sub>3</sub>CN)  $\delta$  157.5, 152.0, 150.2, 149.0, 132.92, 132.88, 127.1, 116.3, 111.0

**HRMS:** (ESI-TOF,  $m/z$ ) calculated for C<sub>9</sub>H<sub>7</sub>NOBr [M+H]<sup>+</sup>, 223.9706 found: 223.9711

**IR:** (ATR, neat, cm<sup>-1</sup>) 3057 (w), 1751 (m), 1668 (m), 1633 (m), 1545 (w), 1494 (s), 1387 (w), 1259 (w), 1223 (w), 1197 (m), 1095 (w), 888 (w), 765 (w), 651 (w)

**m.p.** = 61 – 64 °C (decomp.)

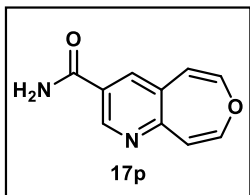

#### Oxepino[4,5-*b*]pyridine-3-carboxamide (17p):

Following the general procedure (0.5 mmol scale), the title compound was isolated by flash chromatography (SiO<sub>2</sub>, hexanes:ethyl acetate = 10:1 to 2:1) as a yellow solid (60 mg, 63%).

$R_f$  = 0.2 (SiO<sub>2</sub>, hexanes:ethyl acetate = 1:3, UV)

**<sup>1</sup>H NMR:** (500 MHz, MeOD)  $\delta$  8.40 (d,  $J$  = 2.1 Hz, 1H), 7.40 (d,  $J$  = 2.1 Hz, 1H), 5.94 (d,  $J$  = 7.9 Hz, 1H), 5.76 (d,  $J$  = 7.7 Hz, 1H), 5.23 (d,  $J$  = 7.9 Hz, 1H), 5.09 (d,  $J$  = 7.7 Hz, 1H)

**<sup>13</sup>C NMR:** (126 MHz, MeOD)  $\delta$  169.2, 159.8, 152.2, 148.8, 147.2, 135.8, 134.4, 129.3, 113.9, 110.6

**HRMS:** (ESI-TOF,  $m/z$ ) calculated for  $C_{10}H_9N_2O_2$   $[M+H]^+$ , 189.0659 found: 189.0657

**IR:** (ATR, neat,  $cm^{-1}$ ) 3288 (m, br), 2980 (w), 1673 (m), 1629 (s), 1630 (s), 1458 (m), 1399 (w), 1234 (s), 927 (w).

**m.p.** = 122 °C (decomp.)

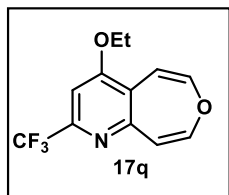

**4-ethoxy-2-(trifluoromethyl)oxepino[4,5-*b*]pyridine (17q):**

Ethanol was used instead of *i*-PrOH. Following the general procedure (0.5 mmol scale), the title compound was isolated by flash chromatography ( $SiO_2$ , hexanes:ethyl acetate = 10:1 to 2:1) as a yellow solid (99 mg, 77%).

$R_f$  = 0.6 ( $SiO_2$ , hexanes:ethyl acetate = 1:1, UV)

**$^1H$  NMR:** (500 MHz,  $CDCl_3$ )  $\delta$  6.76 (s, 1H), 5.95 (d,  $J$  = 7.4 Hz, 1H), 5.86 (d,  $J$  = 7.4 Hz, 1H), 5.55 (d,  $J$  = 7.4 Hz, 1H), 5.46 (dd,  $J$  = 7.4, 0.9 Hz, 1H), 4.07 (q,  $J$  = 7.0 Hz, 2H), 1.43 (td,  $J$  = 7.0, 0.9 Hz, 3H)

**$^{13}C$  NMR:** (126 MHz,  $CDCl_3$ )  $\delta$  161.1, 157.1, 150.9, 148.4, 147.6 (q,  $J$  = 34.3 Hz), 123.7, 121.3 (q,  $J$  = 274.1 Hz), 115.3, 104.7, 102.7 (q,  $J$  = 3.0 Hz), 64.8, 14.5

**HRMS:** (ESI-TOF,  $m/z$ ) calcd. For  $C_{12}H_{11}NO_2F_3$   $[M+H]^+$ , 258.0736; found: 258.0746

**IR:** (ATR, neat,  $cm^{-1}$ ): 2988 (w), 2944 (w), 1740 (m), 1591 (m), 1419 (s), 1386 (w), 1244 (w), 1181 (w), 1093 (s), 911 (w), 768 (w)

**m.p.** = 128 – 131 °C (decomp.)

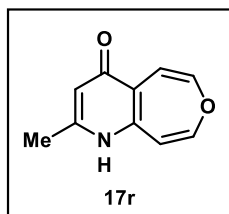

**2-methyl-4a,9a-dihydrooxepino[4,5-*b*]pyridin-4(1H)-one (17r):**

Following the general procedure (0.5 mmol scale), the title compound was isolated by flash chromatography ( $SiO_2$ , MeOH in ethyl acetate, 0 to 30%) as a yellow oil (63 mg, 72%).

$R_f$  = 0.8 ( $SiO_2$ , methanol, UV)

**$^1H$  NMR:** (500 MHz, MeOD)  $\delta$  6.23 (d,  $J$  = 6.7 Hz, 1H), 6.12 (s, 1H), 5.89 (d,  $J$  = 6.5 Hz, 1H), 5.83 (d,  $J$  = 6.5 Hz, 1H), 5.46 (d,  $J$  = 6.7 Hz, 1H), 2.26 (s, 3H)

**$^{13}C$  NMR:** (126 MHz, MeOD)  $\delta$  178.2, 154.3, 149.3, 147.1, 145.8, 122.7, 115.1, 110.5, 109.5, 18.8

**HRMS:** (ESI-TOF,  $m/z$ ) calculated for  $C_{10}H_{10}NO_2$   $[M+H]^+$ , 176.0706 found: 176.0713

**IR:** (ATR, neat,  $cm^{-1}$ ) 3281 (m, b), 1642 (m), 1602 (m), 1494 (s), 1250 (w), 1214 (w), 1167 (w), 968 (w), 760 (w)

**m.p.** = color change from yellow to grey (onset at 131 °C, assumed decomposition) took place slowly and no melting was observed up to 250 °C



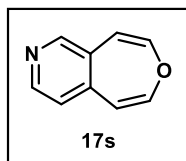

#### Oxepino[4,5-*c*]pyridine (17s):

Following the general procedure (0.5 mmol scale), the title compound was isolated by flash chromatography (SiO<sub>2</sub>, hexanes:ethyl acetate = 10:1 to 2:1) as a yellow oil (58 mg, 79%).

**R<sub>f</sub>** = 0.4 (SiO<sub>2</sub>, hexanes:ethyl acetate = 2:1, UV)

**<sup>1</sup>H NMR:** (500 MHz, CD<sub>3</sub>CN) δ 8.07 (s, 1H), 7.76 (s, 1H), 6.54 (d, *J* = 4.8 Hz, 1H), 5.78 (d, *J* = 7.5 Hz, 1H), 5.72 (d, *J* = 7.5 Hz, 1H), 5.10 (d, *J* = 7.5 Hz, 1H), 5.03 (d, *J* = 7.6 Hz, 1H)

**<sup>13</sup>C NMR:** (126 MHz, CD<sub>3</sub>CN) δ 151.2, 151.1, 149.6, 148.6, 144.3, 131.8, 123.4, 111.5, 110.6

**HRMS:** (ESI-TOF, *m/z*) calculated for C<sub>9</sub>H<sub>8</sub>NO [M+H]<sup>+</sup>, 146.0600 found: 146.0601

**IR:** (ATR, neat, cm<sup>-1</sup>) 3028 (w), 1667 (m), 1634 (w), 1582 (m), 1495 (w), 1404 (s), 1327 (w), 1220 (w), 1045 (s), 842 (m), 760 (m)

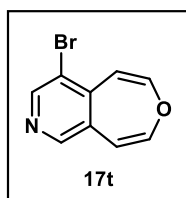

#### 4-bromooxepino[4,5-*c*]pyridine (17t):

Following the general procedure (0.5 mmol scale), the title compound was isolated by flash chromatography (SiO<sub>2</sub>, hexanes:ethyl acetate = 10:1 to 2:1) as a yellow oil (72 mg, 64%).

**R<sub>f</sub>** = 0.2 (SiO<sub>2</sub>, hexanes:ethyl acetate = 1:1, UV)

**<sup>1</sup>H NMR:** (500 MHz, CDCl<sub>3</sub>) δ 8.27 (s, 1H), 7.69 (s, 1H), 5.89 (d, *J* = 7.6 Hz, 1H), 5.78 (d, *J* = 7.3 Hz, 1H), 5.49 (d, *J* = 7.6 Hz, 1H), 5.11 (d, *J* = 7.3 Hz, 1H)

**<sup>13</sup>C NMR:** (126 MHz, CDCl<sub>3</sub>) δ 151.9, 151.8, 149.4, 147.5, 142.5, 132.7, 120.6, 110.5, 110.1

**HRMS:** (ESI-TOF, *m/z*) calculated for C<sub>9</sub>H<sub>7</sub>BrNO [M+H]<sup>+</sup>, 223.9706 found: 223.9696

**IR:** (ATR, neat, cm<sup>-1</sup>): 3038 (w), 3001 (w), 1669 (m), 1629 (m), 1564 (s), 1531 (w), 1247 (s), 1211 (w), 1196 (w), 1055 (s), 936 (w), 760 (w)

**m.p.** = 81 °C (decomp.)

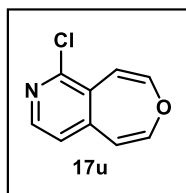

#### 1-chlorooxepino[4,5-*c*]pyridine (17u):

Following the general procedure (0.5 mmol scale), the title compound was isolated by flash chromatography (SiO<sub>2</sub>, hexanes:ethyl acetate = 10:1 to 2:1) as a yellow oil (60 mg, 67%).

**R<sub>f</sub>** = 0.5 (SiO<sub>2</sub>, hexanes:ethyl acetate = 2:1, UV)

**<sup>1</sup>H NMR:** (500 MHz, CDCl<sub>3</sub>) δ 7.94 (d, *J* = 4.9 Hz, 1H), 6.50 (d, *J* = 4.9 Hz, 1H), 5.89 (m, 2H), 5.62 (d, *J* = 7.3 Hz, 1H), 5.14 (d, *J* = 7.3 Hz, 1H)

**<sup>13</sup>C NMR:** (126 MHz, CDCl<sub>3</sub>) δ 152.1, 149.7, 149.4, 149.0, 146.8, 129.4, 122.3, 111.6, 109.9

**HRMS:** (ESI-TOF,  $m/z$ ) calculated for  $C_9H_7NOCl$   $[M+H]^+$ , 180.0211 found: 180.0219

**IR:** (ATR, neat,  $cm^{-1}$ ) 3053 (w), 1668 (m), 1631 (m), 1466 (s), 1392 (w), 1288 (w), 1185 (w), 1057 (m), 901 (w), 763 (w)

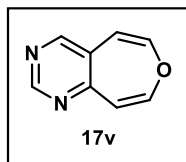

**Oxepino[4,5-*d*]pyrimidine (17v):**

Extraction from 4:1 chloroform:isopropanol (3 x 15mL)

Following the general procedure (0.5 mmol scale), the title compound was isolated by flash chromatography ( $SiO_2$ , hexanes:ethyl acetate = 3:1 to 1:2) as a yellow oil (32 mg, 44%).

$R_f$  = 0.24 ( $SiO_2$ , hexanes:ethyl acetate = 1:2, UV)

**$^1H$  NMR:** (500 MHz,  $CD_3OD$ )  $\delta$  8.46 (s, 1H), 7.80 (s, 1H), 5.99 (d,  $J$  = 7.9 Hz, 1H), 5.74 (d,  $J$  = 7.7 Hz, 1H), 5.05 (d,  $J$  = 7.9 Hz, 1H), 5.01 (d,  $J$  = 7.7 Hz, 1H)

**$^{13}C$  NMR:** (126 MHz,  $CD_3OD$ )  $\delta$  165.2, 158.2, 155.6, 154.5, 149.9, 132.0, 112.7, 107.6

**HRMS:** (ESI-TOF,  $m/z$ ) calculated for  $C_8H_7N_2O$   $[M+H]^+$ , 147.0553 found: 147.0560

**IR:** (ATR, neat,  $cm^{-1}$ ) 1672 (m), 1563 (m), 1456 (s), 1391 (w), 1309 (w), 1049 (m), 767 (w)

### 3-7. Derivatization

**4-methyl-1-(4,5,6-trihydroxycyclohex-2-en-1-yl)-1,2,4-triazolidine-3,5-dione (18):**

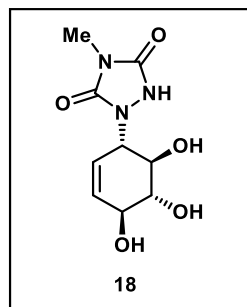

Compound **8a** (20 mg, 0.14 mmol) and water (1.0 mL, 0.1 M) were added to a 4 mL vial, followed by perchloric acid (90mg, 70 wt%, 6.5 equiv.). The reaction mixture was capped and stirred at 100 °C until complete consumption of starting material was observed by TLC. The reaction was concentrated under reduced pressure at room temperature, loaded onto celite and isolated by flash chromatography (MeCN,  $SiO_2$ , hexanes 100% to ethyl acetate 100% to 7:3 ethyl acetate: methanol). The fractions containing product were evaporated under reduced pressure, dissolved in acetonitrile, and filtered (ptfe) to remove any residual silica and evaporated once more. The desired product was obtained as a white solid (17 mg, 71%).

$R_f$  = 0.2 ( $SiO_2$ , ethyl acetate:methanol = 7:3,  $KMnO_4$ )

**$^1H$  NMR:** (500 MHz,  $D_2O$ , MeOD ref.)  $\delta$  6.09 (dddd,  $J$  = 10.1, 4.3, 2.1, 1.0 Hz, 1H), 5.75 (ddt,  $J$  = 10.1, 3.7, 1.0 Hz, 1H), 4.99 (ddt,  $J$  = 5.6, 3.7, 1.6 Hz, 1H), 4.45 – 4.33 (m, 1H), 4.17 (dd,  $J$  = 9.0, 5.6 Hz, 1H), 4.05 (dd,  $J$  = 9.0, 4.3 Hz, 1H), 3.05 (s, 3H)

**$^{13}C$  NMR:** (126 MHz,  $D_2O$ , MeOD ref.)  $\delta$  156.4, 156.3, 133.7, 125.4, 70.8, 69.1, 66.5, 55.7, 25.8

**HRMS:** (ESI-TOF,  $m/z$ ) calculated for  $C_9H_{14}N_3O_5$   $[M+H]^+$ , 244.09280 found: 244.0926

**IR:** (ATR, neat,  $cm^{-1}$ ) 3332 (s, br.), 2924 (w), 1680 (s), 1483 (m), 1399 (m), 1092 (w), 1036 (w), 763 (w), 618 (w)

**m.p.** = 223 °C (decomp.)

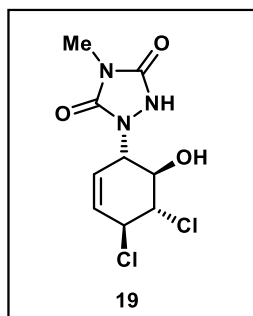

**1-(4,5-dichloro-6-hydroxycyclohex-2-en-1-yl)-4-methyl-1,2,4-triazolidine-3,5-dione (19):**

Compound **8a** (30 mg, 0.14 mmol) and concentrated HCl (14 mL, 0.01 M) were added to a 20 mL vial, and stirred at room temperature for 3 hours. Afterwards, the reaction was portioned between water (14 mL) and ethyl acetate (14 mL). The organic layer was extracted with ethyl acetate (3 × 15 mL). The combined organic layers, were dried with MgSO<sub>4</sub>, filtered, and concentrated under reduced pressure. The crude reaction mixture was loaded on celite and isolated by flash chromatography (CH<sub>2</sub>Cl<sub>2</sub>, SiO<sub>2</sub>, hexanes:ethyl acetate 3:1 to 100% ethyl acetate) to yield the desired product as a white solid (23 mg, 57%).

**R<sub>f</sub>** = 0.82 (SiO<sub>2</sub>, ethyl acetate, UV)

**<sup>1</sup>H NMR:** (500 MHz, MeOD) δ 5.82 (d, *J* = 10.2 Hz, 1H), 5.63 (d, *J* = 10.2 Hz, 1H), 4.81 – 4.66 (m, 2H), 4.10 (dd, *J* = 10.9, 8.7 Hz, 1H), 4.00 (dd, *J* = 10.9, 8.1 Hz, 1H), 3.01 (s, 3H)

**<sup>13</sup>C NMR:** (126 MHz, MeOD) δ 154.2\*, 130.7, 129.7, 72.9, 69.4, 63.2, 58.5, 25.5 (\* 2 signals assigned by HMBC)

**HRMS:** (ESI-TOF, *m/z*) calculated for C<sub>9</sub>H<sub>12</sub>N<sub>3</sub>O<sub>3</sub>Cl<sub>2</sub> [M+H]<sup>+</sup>, 280.0250 found: 280.0257

**IR** (ATR, neat, cm<sup>-1</sup>): 3331 (s, br.), 2970 (w), 1740 (m), 1677 (s), 1488 (m), 1366(m), 1224 (w), 1121 (w), 857(w), 764 (m), 537 (w).

**m.p.** = 197 – 199 °C

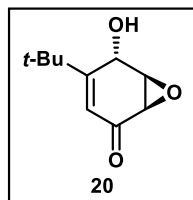

**(1R,5S,6R)-4-(tert-butyl)-5-hydroxy-7-oxabicyclo[4.1.0]hept-3-en-2-one (20):**

To a vial containing finely ground KOH (51 mg, 10.0 equiv., 90 wt%), and **8b** (30 mg, 5:1 r.r., 0.09 mmol) under nitrogen was added *i*-PrOH (1.1 mL, 0.1 M) and degassed with sonication and nitrogen for 15 min. The reaction was heated to 40 °C with vigorous stirring (1000 rpm) for 2 hours. Upon completion, the reaction was cooled in an ice bath and H<sub>2</sub>O (1.1 mL) was added. AcOH is then carefully added dropwise until pH 5. The semicarbazide intermediate was then extracted out with ethyl acetate (3 × 5 mL). The organic layers were combined, dried with NaHCO<sub>3</sub> and concentrated under reduced pressure.

The crude residue was then re-dissolved in CH<sub>2</sub>Cl<sub>2</sub> (1.1 mL, 0.1 M), and the resulting solution was sparged with nitrogen for 15 minutes. To this vial, nickel oxide (Ni<sub>2</sub>O<sub>3</sub>, 30% active basis, 150 mg, 3.0 equiv.) was added as a solid under a stream of nitrogen. The solution was agitated manually for 1 minute and filtered through a celite plug (pipette). To this solution, 5,10,15,20-Tetraphenyl-21*H*,23*H*-porphine (1.0 mg, 0.02 equiv.) was added and the solution was sparged with oxygen for 20 minutes and cooled to – 40 °C. Upon cooling, an overhead lamp was used to irradiate the reaction mixture for 4 hours at – 40 °C. Afterwards, the overhead lamp was turned off and *N,N*-diisopropylethylamine (52.0 mg, 2.0 equiv.) was added – 40 °C

and the solution was stirred for 4 hours at  $-40\text{ }^{\circ}\text{C}$ . The reaction was worked up by adding  $\text{H}_2\text{O}$  (3 mL) and extracting the organic layer  $\text{CH}_2\text{Cl}_2$  ( $3 \times 3\text{ mL}$ ). The organic layer was dried with  $\text{MgSO}_4$  and concentrated under reduced pressure. The resultant crude mixture was loaded onto celite and isolated by flash chromatography ( $\text{CH}_2\text{Cl}_2$ ,  $\text{SiO}_2$ , hexanes: ethyl acetate = 10:1 to 3:1) to give the desired compound as a colorless oil (5.7 mg, 35%).

$R_f$  = 0.4 ( $\text{SiO}_2$ , hexanes:ethyl acetate = 1:1, UV,  $\text{KMnO}_4$ )

$^1\text{H NMR}$ : (500 MHz,  $\text{CDCl}_3$ )  $\delta$  5.95 (d,  $J$  = 1.8 Hz, 1H), 4.86 (ddd,  $J$  = 9.3, 2.0, 0.9 Hz, 1H), 3.84 (dd,  $J$  = 3.8, 2.0 Hz, 1H), 3.45 (ddd,  $J$  = 3.8, 1.8, 0.9 Hz, 1H), 1.89 – 1.72 (m, 1H), 1.22 (s, 9H)

$^{13}\text{C NMR}$ : (126 MHz,  $\text{CDCl}_3$ )  $\delta$  195.3, 166.0, 121.7, 63.7, 55.9, 52.1, 36.0, 29.5

$\text{IR}$ : (ATR, neat,  $\text{cm}^{-1}$ ) 3401 (w, br.), 2965(m), 1665 (s), 1370 (2), 1248 (w), 1037 (m), 854 (w), 732 (w)

$\text{HRMS}$ : (ESI-TOF,  $m/z$ ) calculated for  $\text{C}_{10}\text{H}_{15}\text{O}_3$   $[\text{M}+\text{Na}]^+$ , 183.1016 found: 183.1015

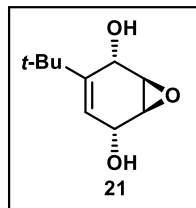

**(1R,2S,5R,6S)-3-(tert-butyl)-7-oxabicyclo[4.1.0]hept-3-ene-2,5-diol (21):**

To a vial containing finely ground KOH (51 mg, 10 equiv., 90 wt%), and **8b** (5:1 r.r., 0.09 mmol) under nitrogen was added *i*-PrOH (1.1 mL, 0.1 M) and the solution degassed with sonication and nitrogen for 15 min. The reaction was heated to  $40\text{ }^{\circ}\text{C}$  with vigorous stirring (1000 rpm) for 2 hours. Upon completion, the reaction was cooled in an ice bath and  $\text{H}_2\text{O}$  (1.1 mL) was added. AcOH was then carefully added dropwise until pH 5. The aqueous phase was then extracted with ethyl acetate ( $3 \times 5\text{ mL}$ ). The combined organic layers were dried with  $\text{MgSO}_4$  and concentrated under reduced pressure.

The crude residue was then re-dissolved in  $\text{CH}_2\text{Cl}_2$  (1.1 mL, 0.1 M), and the resulting solution was sparged with nitrogen for 15 minutes. To this vial, nickel oxide ( $\text{Ni}_2\text{O}_3$ , 30% active basis, 150 mg, 3.0 equiv.) was added as a solid under a stream of nitrogen. The solution was agitated manually for 1 minute, filtered through a celite plug. To this solution, 5,10,15,20-tetraphenyl-21*H*,23*H*-porphine (1.0 mg, 0.02 equiv.) was added and the solution was sparged with oxygen for 20 minutes and cooled to  $-40\text{ }^{\circ}\text{C}$ . Upon cooling, an overhead lamp was used to irradiate the reaction mixture for 4 hours at  $-40\text{ }^{\circ}\text{C}$ . Afterwards, a solution of thiourea (42 mg, 6.0 equiv.) in methanol (1.0 mL) was added and the reaction was warmed to room temperature. The reaction was diluted with  $\text{H}_2\text{O}$  (3 mL) and the aqueous phase was extracted with  $\text{CH}_2\text{Cl}_2$  ( $3 \times 3\text{ mL}$ ). The combined organic layers were dried with  $\text{MgSO}_4$  and concentrated under reduced pressure. The resultant crude mixture was loaded onto celite and isolated by flash chromatography ( $\text{CH}_2\text{Cl}_2$ ,  $\text{SiO}_2$ , hexanes: ethyl acetate = 3:1 to 1:3) to give the desired compound as a colorless oil (6.3 mg, 38%).

$R_f$  = 0.2 ( $\text{SiO}_2$ , hexanes:ethyl acetate = 1:2, UV,  $\text{KMnO}_4$ )

$^1\text{H NMR}$ : (500 MHz,  $\text{CD}_3\text{CN}$ )  $\delta$  5.61 (dd,  $J$  = 5.8, 1.6 Hz, 1H), 4.52 (d,  $J$  = 5.8 Hz, 1H), 4.36 – 4.28 (m, 1H), 3.27 (ddd,  $J$  = 3.8, 2.6, 1.4 Hz, 1H), 3.21 – 3.13 (m, 1H), 3.09 (s, 1H), 2.89 (d,  $J$  = 8.6 Hz, 1H), 1.08 (s, 9H)

$^{13}\text{C NMR}$ : (126 MHz,  $\text{CD}_3\text{CN}$ )  $\delta$  147.8, 120.8, 64.0, 63.5, 54.0, 51.9, 35.7, 29.8

**IR:** (ATR, neat,  $\text{cm}^{-1}$ ) 3324 (m, br.), 2961 (m), 2877 (w), 1665 (w), 1462 (2), 1366 (w), 1251 (w), 1022 (s), 1003 (s), 834 (w), 804 (w)

**HRMS:** (ESI-TOF,  $m/z$ ) calculated for  $\text{C}_{10}\text{H}_{16}\text{O}_3\text{Na}$   $[\text{M}+\text{Na}]^+$ , 207.0997 found: 207.1006

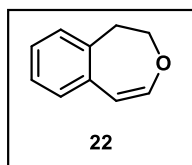

**1,2-dihydrobenzo[d]oxepine (22):**

Benzoxepine **17a** (67 mg, 0.46 mmol) and methanol (2.0 mL, 0.2 M) were added to a 4 mL vial. The solution was sparged with nitrogen under sonication for 15 minutes, followed by the addition of  $\text{Rh}/\text{Al}_2\text{O}_3$  (29 mg, 3 mol%), and sparged for an additional 10 minutes. The reaction mixture was sparged with hydrogen for 3 minutes and left to stir (1000 rpm) under a hydrogen atmosphere (1 atm) until full completion of the starting material was observed (ca. 1 hour). The reaction was filtered through celite and concentrating under reduced pressure. The resultant crude mixture was loaded onto celite and isolated by flash chromatography ( $\text{CH}_2\text{Cl}_2$ ,  $\text{SiO}_2$ , hexanes 100%) to yield the desired compound as a colorless oil (60 mg, 88%).

$R_f$  = 0.6 ( $\text{SiO}_2$ , hexanes:ethyl acetate = 9:1, UV)

**$^1\text{H}$  NMR:** (500 MHz,  $\text{CDCl}_3$ )  $\delta$  7.18 – 7.10 (m, 2H), 7.08 – 7.04 (m, 2H), 6.43 (dd,  $J$  = 8.1, 0.7 Hz, 1H), 5.40 (d,  $J$  = 8.1 Hz, 1H), 4.40 – 4.20 (m, 2H), 3.20 – 3.04 (m, 2H)

**$^{13}\text{C}$  NMR:** (126 MHz,  $\text{CDCl}_3$ )  $\delta$  145.3, 139.2, 135.3, 129.2, 128.6, 126.5, 125.4, 105.2, 70.2, 38.8

**HRMS:** (EI-TOF,  $m/z$ ) calcd. for  $\text{C}_{10}\text{H}_{10}\text{O}$   $[\text{M}]^+$ , 146.07262; found: 146.07319

**IR:** (ATR, neat,  $\text{cm}^{-1}$ ) = 3045 (w), 2971 (w), 1632 (s), 1492 (m), 1463 (w), 1414 (w), 1318 (m), 1307 (m), 1208 (w), 1124 (s), 1081 (s), 957 (m), 832 (m)

*The analytical data were in accordance with previously reported values.*<sup>10</sup>

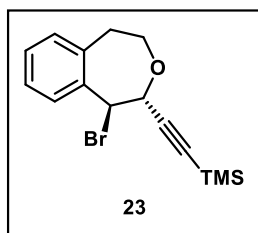

**((1-bromo-1,2,4,5-tetrahydrobenzo[d]oxepin-2-yl)ethynyl)trimethylsilane (23):**

*This procedure was modified from the literature protocol of Watson.*<sup>12</sup>

Compound **22** (38 mg, 0.26 mmol) and *N*-bromosuccinimide (60 mg, 1.3 equiv.) were added to a 4 mL vial and of  $\text{CH}_2\text{Cl}_2$  (3.0 mL, 0.1 M) and cooled to  $-20^\circ\text{C}$ . Acetic anhydride (1.6 mg, 1.6  $\mu\text{L}$ , 6 mol%), and acetic acid (160 mg, 10 equiv.) were added sequentially, and the reaction was stirred at  $-20^\circ\text{C}$  overnight. The reaction was quenched with  $\text{H}_2\text{O}$  (3 mL) and the aqueous phase was extracted with  $\text{CH}_2\text{Cl}_2$  ( $3 \times 3$  mL). The combined organics were dried with  $\text{MgSO}_4$  and concentrated under reduced pressure.

In a nitrogen filled glovebox,  $\text{ZnBr}_2$  (5.5 mg, 10 mol%) was added to the crude reaction mixture and the reaction was sealed and removed from the glovebox.  $\text{CH}_2\text{Cl}_2$  (1.4 mL) was added and the reaction mixture was cooled to  $0^\circ\text{C}$ . Hunig's base (48 mg, 1.5 equiv.) and ethynyltrimethylsilane (32 mg, 1.3 equiv.) were added sequentially.  $\text{BF}_3 \cdot \text{OEt}_2$  (70 mg, 2.0 equiv.) was added dropwise and the reaction was stirred overnight at  $0^\circ\text{C}$ . Upon completion by TLC,  $\text{H}_2\text{O}$  (5 mL) was added and aqueous phase was extracted with  $\text{CH}_2\text{Cl}_2$

(3 × 5mL). The combined organic extracts were dried with MgSO<sub>4</sub>, filtered, concentrated under reduced pressure, loaded onto celite and purified by flash chromatography (CH<sub>2</sub>Cl<sub>2</sub>, SiO<sub>2</sub>, hexanes:ethyl acetate 1:0 to 5:1) to yield the product as a colorless gel (49 mg, 62% over two steps).

**R<sub>f</sub>** = 0.2 (SiO<sub>2</sub>, hexanes:ethyl acetate = 9:1, UV)

**<sup>1</sup>H NMR:** (500 MHz, CDCl<sub>3</sub>) δ 7.24 – 7.13 (m, 3H), 7.10 (d, *J* = 7.4 Hz, 1H), 5.15 (d, *J* = 3.9 Hz, 1H), 4.90 (d, *J* = 4.0 Hz, 1H), 4.12 (t, *J* = 12.1 Hz, 1H), 4.03 (ddd, *J* = 12.1, 4.2, 2.8 Hz, 1H), 3.72 (ddd, *J* = 15.3, 11.5, 2.8 Hz, 1H), 2.68 (dd, *J* = 15.3, 4.1 Hz, 1H), -0.04 (s, 9H)

**<sup>13</sup>C NMR:** (126 MHz, CDCl<sub>3</sub>) δ 141.2, 137.6, 130.61, 130.59, 129.0, 126.3, 99.5, 97.2, 71.3, 64.7, 59.0, 38.2, -0.4

**HRMS:** (ESI-TOF, *m/z*) calculated for C<sub>15</sub>H<sub>20</sub>OBrSi [M+H]<sup>+</sup>, 323.0461 found: 323.0472

**IR:** (ATR, neat, cm<sup>-1</sup>): 2958 (w), 2170 (w), 1491 (m), 1308 (w), 1249 (s), 1166 (s), 1116 (w), 1022 (w), 753 (m), 721 (m), 692 (m)

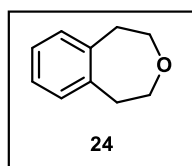

**1,2,4,5-tetrahydrobenzo[d]oxepine (24):**

Benzoxepin **17a** (20 mg, 0.14 mmol) was charged into a 4 mL vial and methanol (1.4 mL, 0.1 M) was added. The solution was sparged with nitrogen under sonication for 15 minutes, followed by the addition of Rh/Al<sub>2</sub>O<sub>3</sub> (8 mg, 3 mol%) and sparged for an additional 10 minutes. The reaction mixture was sparged with hydrogen (1 atm) for 3 minutes and left to stir (1000 rpm) overnight. The reaction was filtered through celite and concentrating under reduced pressure to yield the desired compound as a colorless oil (19.3 mg, 94%).

**R<sub>f</sub>** = 0.3 (SiO<sub>2</sub>, hexanes:ethyl acetate = 9:1, UV)

**<sup>1</sup>H NMR:** (500 MHz, CDCl<sub>3</sub>) δ 7.17 – 7.03 (m, 4H), 3.84 – 3.76 (m, 4H), 3.00 (dd, *J* = 5.8, 3.7 Hz, 4H)

**<sup>13</sup>C NMR:** (126 MHz, CDCl<sub>3</sub>) δ 141.7, 129.5, 126.5, 70.4, 40.1

**HRMS:** (EI, *m/z*) calcd. For C<sub>10</sub>H<sub>12</sub>O [M]<sup>+</sup>, 148.0882 found: 148.08840

**IR:** (ATR, neat, cm<sup>-1</sup>) = 3019 (m), 2926 (m), 1493(w), 1454 (w), 1430 (w), 1302 (m), 1251 (m), 752(s)

*The analytical data were in accordance with previously reported values.<sup>11</sup>*

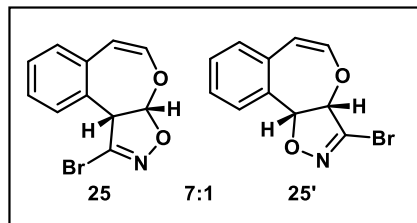

**(3aR\*,10bR\*)-1-bromo-3a,10b-dihydrobenzo[4,5]oxepino[3,2-d]isoxazole (25):**

*This procedure was modified from the literature protocol of Baran.<sup>9</sup>*

A 4 mL vial was charged with benzoxepine **17a** (40 mg, 0.28 mmol, 1.0 equiv.), hydroxycarbonimidic dibromide (84.4 mg, 1.5 equiv., 0.42 mmol), potassium carbonate (115 mg, 3.0 equiv., 0.8mmol), and acetonitrile (2.8 mL). The reaction mixture was left to stir at room temperature overnight. Upon completion, the reaction was partitioned with H<sub>2</sub>O (3 mL) and ethyl acetate (3 mL). The aqueous phase was extracted with ethyl acetate (3 × 3 mL), dried

with MgSO<sub>4</sub>, and concentrated under reduced pressure. The resultant crude mixture was loaded onto celite and isolated by flash chromatography (CH<sub>2</sub>Cl<sub>2</sub>, SiO<sub>2</sub>, hexanes: ethyl acetate = 1:0 to 5:1) to give the desired compound as a colorless oil (61 mg, 7:1 r.r., inseparable mixture, 83%).

**R<sub>f</sub>** = 0.2 (SiO<sub>2</sub>, hexanes:ethyl acetate = 9:1, UV)

**Major Constitutional Isomer <sup>1</sup>H NMR:** <sup>1</sup>H NMR (500 MHz, CDCl<sub>3</sub>) δ 7.45 – 7.42 (m, 1H), 7.39 – 7.31 (m, 2H), 7.26 – 7.22 (m, 1H), 6.70 (d, *J* = 6.1 Hz, 1H), 6.46 (d, *J* = 7.4 Hz, 1H), 6.12 (d, *J* = 6.1 Hz, 1H), 4.59 (d, *J* = 7.4 Hz, 1H)

**Major Constitutional Isomer <sup>13</sup>C NMR:** (126 MHz, CDCl<sub>3</sub>) δ 145.6, 141.0, 135.3, 132.0, 130.8, 129.5, 129.3, 128.0, 117.7, 115.2, 61.9

**Visible Minor Constitutional Isomer <sup>1</sup>H NMR:** (500 MHz, CDCl<sub>3</sub>) δ 7.21 – 7.19 (m, 1H), 6.54 (d, *J* = 6.1 Hz, 1H), 6.14 (d, *J* = 6.1 Hz, 1H), 5.65 (d, *J* = 8.1 Hz, 1H), 5.29 (d, *J* = 8.1 Hz, 1H) (\*two protons are obscured by major constitutional isomer)

**Minor Constitutional Isomer <sup>13</sup>C NMR:** (126 MHz, CDCl<sub>3</sub>) δ 144.9, 138.5, 135.3, 135.3, 131.8, 130.1, 130.0, 127.6, 120.7, 96.5, 87.3

**HRMS:** (ESI-TOF, *m/z*) calculated for C<sub>11</sub>H<sub>9</sub>NO<sub>2</sub>Br [M+H]<sup>+</sup>, 265.9811 found: 265.9826

**IR:** (ATR, neat, cm<sup>-1</sup>): 2970 (w), 1738 (m), 1639 (w), 1451 (w), 1366 (w), 1126 (s), 1093 (s), 754 (s), 553 (w)

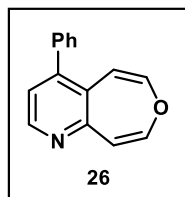

**4-phenyloxepino[4,5-b]pyridine (26):**

Compound **17o** (40 mg, 0.18 mmol), Pd(PPh<sub>3</sub>)<sub>4</sub> (21 mg, 10 mol%), phenylboronic acid (65 mg, 3.0 equiv.), and cesium carbonate (116 mg, 2.0 equiv.) were added to a 4mL vial inside a glovebox. The vial was capped and removed from the glovebox, and MeCN (1.8 mL, 0.1 M) was added and the reaction was heated to 80 °C and stirred (1000 rpm) overnight. After 24h, the reaction was portioned between water (5 mL) and ethyl acetate (5 mL). The organic layer was extracted with ethyl acetate (3 × 10 mL), dried over MgSO<sub>4</sub> and concentrated under reduced pressure. The material was loaded onto celite and isolated by flash chromatography (CH<sub>2</sub>Cl<sub>2</sub>, SiO<sub>2</sub>, hexanes:ethyl acetate 1:0 to 1:1) to yield the product as a yellow oil (25.3 mg, 64%).

**R<sub>f</sub>** = 0.6 (SiO<sub>2</sub>, hexanes:ethyl acetate = 1:1, UV)

**<sup>1</sup>H NMR:** (500 MHz, CDCl<sub>3</sub>) δ 8.20 (dd, *J* = 5.0, 1.0 Hz, 1H), 7.46 – 7.35 (m, 3H), 7.31 – 7.27 (m, 2H), 6.83 (dd, *J* = 5.0, 1.0 Hz, 1H), 6.07 (dd, *J* = 7.3, 1.0 Hz, 1H), 5.82 (dd, *J* = 7.3, 1.0 Hz, 1H), 5.62 (dd, *J* = 7.3, 1.0 Hz, 1H), 5.17 (dd, *J* = 7.3, 1.0 Hz, 1H)

**<sup>13</sup>C NMR:** (126 MHz, CDCl<sub>3</sub>) δ 156.1, 150.3, 147.8, 147.4, 147.2, 138.1, 129.8, 129.1, 128.5, 128.3, 122.7, 116.2, 110.5

**HRMS:** (ESI-TOF, *m/z*) calculated for C<sub>15</sub>H<sub>12</sub>NO [M+H]<sup>+</sup>, 222.0913 found: 222.0914

**IR:** (ATR, neat, cm<sup>-1</sup>) 3055 (w), 1737 (s), 1669 (m), 1577 (w), 1537 (w), 1494 (m), 1195 (w), 1048 (w), 1026 (w), 701 (w), 586 (w)

### 3-8. Large-scale procedures

#### Gram-scale synthesis of **16a**:

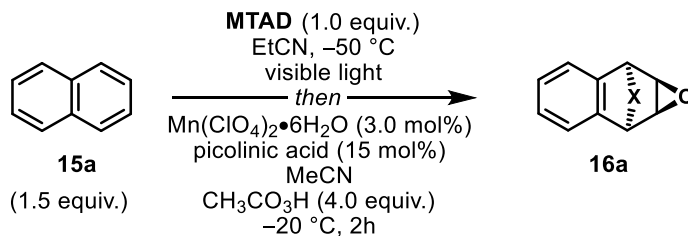

A solution of *N*-methyl-1,2,4-triazoline-3,5-dione (**7**, MTAD, 800 mg, 7.1 mmol, 1.0 equiv.) and naphthalene (**15a**, 1.5 g, 10.6 mmol, 1.5 equiv.) in propionitrile (71 mL, 0.1M) was irradiated with LED lights at  $-78\text{ }^{\circ}\text{C}$  under a nitrogen atmosphere (see Section 2-3.). Upon decolorization, the reaction vessel was transferred to a  $-20\text{ }^{\circ}\text{C}$  bath under moderate stirring (300 rpm). A suspension of  $\text{Mn}(\text{ClO}_4)_2 \cdot (\text{H}_2\text{O})_6$  (77 mg, 0.21 mmol, 0.03 equiv.) and picolinic acid (131 mg, 1.1 mmol, 0.15 equiv.) in acetonitrile (60 mL, sonicated for 5 minutes), was added over the course of 10 seconds, being careful to ensure proper mixing to prevent cycloreversion. To this solution, peracetic acid (32 wt% in dilute acetic acid, 6.0 mL, 4.0 equiv.) was added in 0.25 mL portions. Overall, the addition of peracetic acid took 5 minutes. The reaction was then left to stir for 2 hours at  $-20\text{ }^{\circ}\text{C}$ . Afterwards, a 10% sodium thiosulfate solution (80 mL) was added and the phases were separated. The aqueous phase was extracted with ethyl acetate ( $3 \times 100\text{ mL}$ ), then the organic extracts were combined, dried over  $\text{MgSO}_4$ , and concentrated under reduced pressure. The title compound was immediately isolated by flash chromatography ( $\text{SiO}_2$ , hexanes:ethyl acetate = 5:1 to 1:1) to yield a brown solid that was analytically pure by  $^1\text{H-NMR}$ . The solid was triturated with methanol (30 mL) to yield the title compound **16a** as an off-white solid (1.51g, 1.7:1 d.r., 83%).

#### Gram-scale synthesis of **17a**:

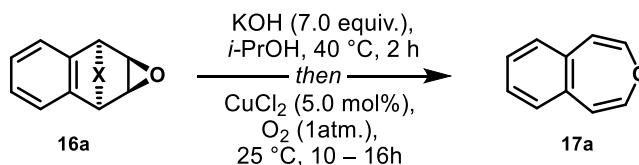

To a vial containing finely ground  $\text{KOH}$  (1.8 g, 7.0 equiv., 90 wt%), and **16a** (1.08g, 4.20 mmol, 1.0 equiv.) under nitrogen was added *i*-PrOH (42 mL, 0.1 M) and degassed with sonication and nitrogen for 20 min. The reaction was heated to  $40\text{ }^{\circ}\text{C}$  with vigorous stirring (700 rpm) and progress was monitored by TLC in 30 min intervals. After 2 hours, the reaction was cooled in an ice bath and  $\text{H}_2\text{O}$  (42 mL) were added. AcOH was then carefully added dropwise until pH = 5. Then  $\text{CuCl}_2 \cdot (\text{H}_2\text{O})_2$  (39 mg, 0.2 mmol, 0.05 mol%) was added as a solid, followed by sparging with oxygen, and the reaction was stirred overnight under an atmosphere of oxygen. Upon completion, diethyl ether (40 mL) and saturated brine (40 mL) were added to the reaction mixture and the organic layer was extracted with ether ( $3 \times 30\text{ mL}$ ), until the organic phase was no longer yellow. The combined organics were washed with brine (30 mL), dried over  $\text{MgSO}_4$ , filtered, and concentrated under vacuum. The title compound was isolated by flash chromatography ( $\text{SiO}_2$ , hexanes:ethyl acetate = 1:0 to 10:1) to afford **17a** as a bright yellow solid (520 mg, 86%).



### Gram-scale synthesis of **16f**:

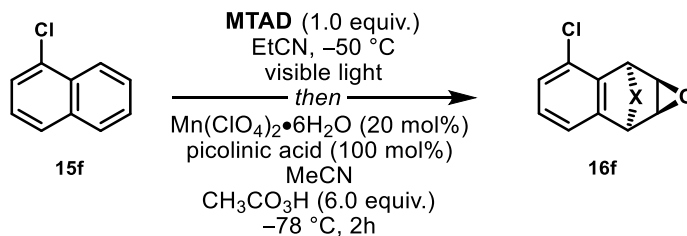

A solution of *N*-methyl-1,2,4-triazoline-3,5-dione (**7**, MTAD, 600 mg, 5.31 mmol, 1.0 equiv.) in propionitrile (71 mL, 0.1 M) was placed in a bath pre-cooled to  $-78\text{ }^{\circ}\text{C}$  using a chiller. After cooling for 10 minutes, 1-chloronaphthalene (**15f**, 1.29g, 8.0 mmol, 1.5 equiv.) was added slowly, after which the solution was irradiated with LED lights at  $-78\text{ }^{\circ}\text{C}$  until the solution had become colorless (see Section 2-3.). Upon decolorization, the reaction was then transferred to a bath at  $-78\text{ }^{\circ}\text{C}$  under moderate stirring (400 rpm). A suspension of  $\text{Mn}(\text{ClO}_4)_2 \cdot (\text{H}_2\text{O})_6$  (375 mg, 1.06 mmol, 0.20 equiv.) and picolinic acid (653 mg, 5.31 mmol, 1.0 equiv.) in acetonitrile (31 mL, sonicated for 30 seconds – 1 minute), was added over the course of 10 seconds, being careful to ensure proper mixing such that the dearomatized product does not cyclorevert. To this solution, peracetic acid (32 wt% in dilute acetic acid, 6.9 mL, 6.0 equiv.), was added over the course of 1 hour in 6 evenly spaced portions and left to stir for another hour at  $-78\text{ }^{\circ}\text{C}$ . Afterward, the reaction was warmed to room temperature and a 10% sodium thiosulfate solution (60 mL) and the organic phase was separated. The aqueous phase was extracted with ethyl acetate ( $3 \times 40\text{ mL}$ ). The organic extracts were combined, passed through a silica plug, and flushed with  $\text{CH}_2\text{Cl}_2$  (40 mL). The organic phase was then dried over  $\text{MgSO}_4$  and concentrated under reduced pressure. The title compound was isolated by flash chromatography ( $\text{SiO}_2$ , hexanes:ethyl acetate = 5:1 to 1:1) to afford **16f** as an off-white solid (1.15 g, >20:1 d.r., 75%).

## 4. Crystallographic studies

X-ray diffraction experiments were carried out on single crystals mounted on Cryo-loops using Paratone-N or Krytox oils. The data was collected on Bruker D8 Venture / Photon II or on a Bruker APEX II diffractometers in George L. Clark X-ray Facility at UIUC. Multi-scan absorption correction was applied. The space group was determined in XPREP (Bruker AXS). The solutions were obtained using Intrinsic Phasing method, as implemented in SHELXT,<sup>13</sup> and refined using full-matrix least squares against  $F^2$ , as implemented in SHELXL,<sup>14</sup> using OLEX2<sup>15</sup> as the graphical user interface.

### Crystallographic Data for compound 8a

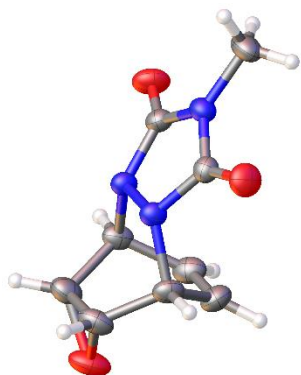

**Table S5. Crystal data and structure refinement.**

|                                             |                                                               |
|---------------------------------------------|---------------------------------------------------------------|
| CCDC                                        | 1988277                                                       |
| Empirical formula                           | C <sub>9</sub> H <sub>9</sub> N <sub>3</sub> O <sub>3</sub>   |
| Formula weight                              | 207.19                                                        |
| Temperature/K                               | 296.15                                                        |
| Crystal system                              | monoclinic                                                    |
| Space group                                 | P2 <sub>1</sub> /n                                            |
| a/Å                                         | 7.5594(7)                                                     |
| b/Å                                         | 15.3365(14)                                                   |
| c/Å                                         | 7.7117(7)                                                     |
| α/°                                         | 90                                                            |
| β/°                                         | 98.206(2)                                                     |
| γ/°                                         | 90                                                            |
| Volume/Å <sup>3</sup>                       | 884.90(14)                                                    |
| Z                                           | 4                                                             |
| ρ <sub>calc</sub> /cm <sup>3</sup>          | 1.555                                                         |
| μ/mm <sup>-1</sup>                          | 0.120                                                         |
| F(000)                                      | 432.0                                                         |
| Crystal size/mm <sup>3</sup>                | 0.532 × 0.453 × 0.302                                         |
| Radiation                                   | MoKα (λ = 0.71073)                                            |
| 2θ range for data collection/°              | 7.546 to 61.076                                               |
| Index ranges                                | -10 ≤ h ≤ 9, -21 ≤ k ≤ 21, -11 ≤ l ≤ 10                       |
| Reflections collected                       | 12250                                                         |
| Independent reflections                     | 2701 [R <sub>int</sub> = 0.0190, R <sub>sigma</sub> = 0.0151] |
| Data/restraints/parameters                  | 2701/0/137                                                    |
| Goodness-of-fit on F <sup>2</sup>           | 1.036                                                         |
| Final R indexes [I ≥ 2σ (I)]                | R <sub>1</sub> = 0.0418, wR <sub>2</sub> = 0.1241             |
| Final R indexes [all data]                  | R <sub>1</sub> = 0.0469, wR <sub>2</sub> = 0.1304             |
| Largest diff. peak/hole / e Å <sup>-3</sup> | 0.32/-0.30                                                    |

### Crystallographic Data for compound 16f

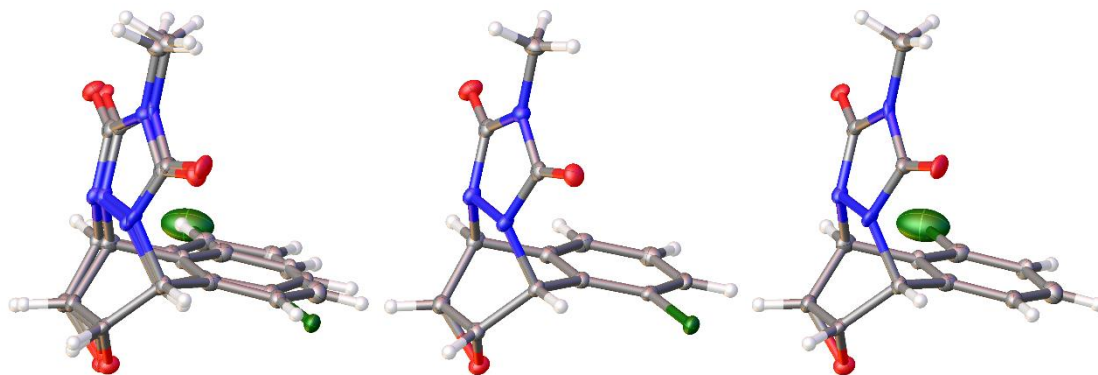

**Table S6. Crystal data and structure refinement**

|                                               |                                                                  |
|-----------------------------------------------|------------------------------------------------------------------|
| CCDC                                          | 1988278                                                          |
| Empirical formula                             | $\text{C}_{13}\text{H}_{10}\text{ClN}_3\text{O}_3$               |
| Formula weight                                | 291.69                                                           |
| Temperature/K                                 | 100.01                                                           |
| Crystal system                                | orthorhombic                                                     |
| Space group                                   | Pbca                                                             |
| $a/\text{\AA}$                                | 6.8955(2)                                                        |
| $b/\text{\AA}$                                | 15.5594(4)                                                       |
| $c/\text{\AA}$                                | 21.9079(6)                                                       |
| $\alpha/^\circ$                               | 90                                                               |
| $\beta/^\circ$                                | 90                                                               |
| $\gamma/^\circ$                               | 90                                                               |
| Volume/ $\text{\AA}^3$                        | 2350.50(11)                                                      |
| Z                                             | 8                                                                |
| $\rho_{\text{calc}}/\text{g cm}^{-3}$         | 1.649                                                            |
| $\mu/\text{mm}^{-1}$                          | 0.337                                                            |
| $F(000)$                                      | 1200.0                                                           |
| Crystal size/ $\text{mm}^3$                   | $0.281 \times 0.126 \times 0.089$                                |
| Radiation                                     | MoK $\alpha$ ( $\lambda = 0.71073$ )                             |
| $2\theta$ range for data collection/ $^\circ$ | 5.236 to 56.64                                                   |
| Index ranges                                  | $-9 \leq h \leq 9, -20 \leq k \leq 20, -29 \leq l \leq 29$       |
| Reflections collected                         | 27140                                                            |
| Independent reflections                       | 2925 [ $R_{\text{int}} = 0.0470$ , $R_{\text{sigma}} = 0.0233$ ] |
| Data/restraints/parameters                    | 2925/756/305                                                     |
| Goodness-of-fit on $F^2$                      | 1.099                                                            |
| Final R indexes [ $I \geq 2\sigma(I)$ ]       | $R_1 = 0.0335$ , $wR_2 = 0.0788$                                 |
| Final R indexes [all data]                    | $R_1 = 0.0418$ , $wR_2 = 0.0826$                                 |
| Largest diff. peak/hole / $e \text{\AA}^{-3}$ | 0.32/-0.25                                                       |

### Crystallographic Data for compound 17a

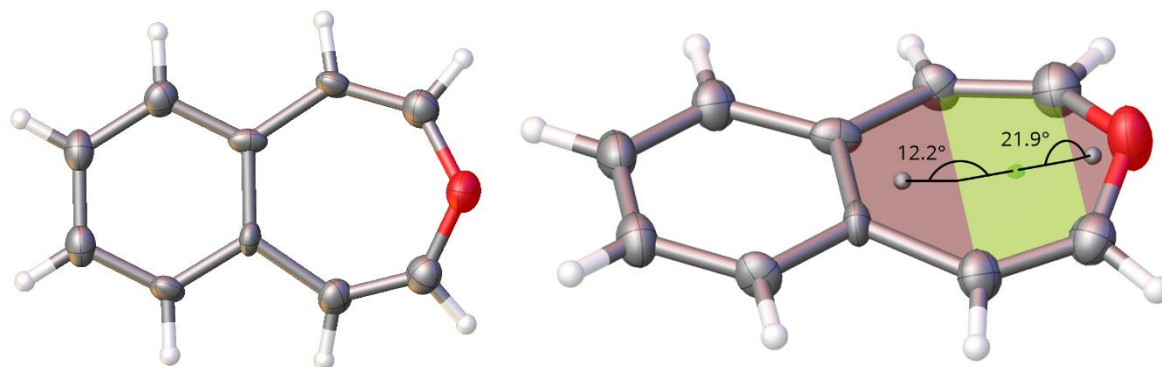

**Table S7. Crystal data and structure refinement.**

|                                             |                                                              |
|---------------------------------------------|--------------------------------------------------------------|
| CCDC                                        | 1988276                                                      |
| Empirical formula                           | C <sub>10</sub> H <sub>8</sub> O                             |
| Formula weight                              | 144.16                                                       |
| Temperature/K                               | 100.0                                                        |
| Crystal system                              | monoclinic                                                   |
| Space group                                 | P2 <sub>1</sub> /c                                           |
| a/Å                                         | 7.8858(2)                                                    |
| b/Å                                         | 6.0451(2)                                                    |
| c/Å                                         | 8.4347(3)                                                    |
| α/°                                         | 90                                                           |
| β/°                                         | 114.3054(10)                                                 |
| γ/°                                         | 90                                                           |
| Volume/Å <sup>3</sup>                       | 366.45(2)                                                    |
| Z                                           | 2                                                            |
| ρ <sub>calc</sub> /cm <sup>3</sup>          | 1.307                                                        |
| μ/mm <sup>-1</sup>                          | 0.083                                                        |
| F(000)                                      | 152.0                                                        |
| Crystal size/mm <sup>3</sup>                | 0.541 × 0.227 × 0.142                                        |
| Radiation                                   | MoKα (λ = 0.71073)                                           |
| 2θ range for data collection/°              | 8.578 to 56.54                                               |
| Index ranges                                | -10 ≤ h ≤ 10, -8 ≤ k ≤ 8, -11 ≤ l ≤ 11                       |
| Reflections collected                       | 8457                                                         |
| Independent reflections                     | 901 [R <sub>int</sub> = 0.0175, R <sub>sigma</sub> = 0.0113] |
| Data/restraints/parameters                  | 901/86/88                                                    |
| Goodness-of-fit on F <sup>2</sup>           | 1.166                                                        |
| Final R indexes [I ≥ 2σ (I)]                | R <sub>1</sub> = 0.0421, wR <sub>2</sub> = 0.1120            |
| Final R indexes [all data]                  | R <sub>1</sub> = 0.0430, wR <sub>2</sub> = 0.1126            |
| Largest diff. peak/hole / e Å <sup>-3</sup> | 0.19/-0.16                                                   |

### Crystallographic data for compound 16q

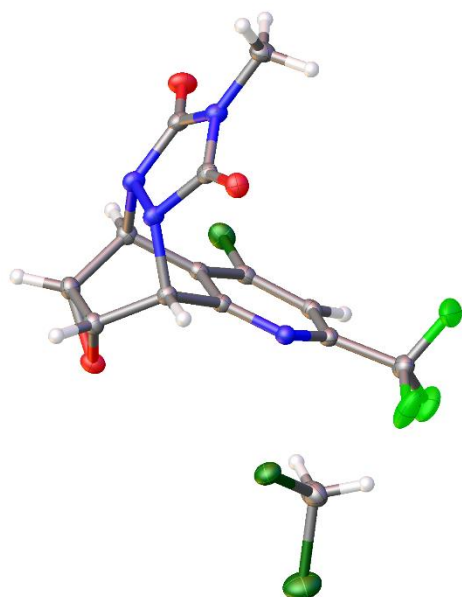

**Table S8. Crystal data and structure refinement.**

|                                                |                                                                |
|------------------------------------------------|----------------------------------------------------------------|
| CCDC                                           | 1988279                                                        |
| Empirical formula                              | $C_{13.5}H_9Cl_2F_3N_4O_3$                                     |
| Formula weight                                 | 403.15                                                         |
| Temperature/K                                  | 99.99                                                          |
| Crystal system                                 | monoclinic                                                     |
| Space group                                    | C2/c                                                           |
| a/Å                                            | 24.6871(11)                                                    |
| b/Å                                            | 6.8296(3)                                                      |
| c/Å                                            | 21.0493(9)                                                     |
| $\alpha/^\circ$                                | 90                                                             |
| $\beta/^\circ$                                 | 119.6990(10)                                                   |
| $\gamma/^\circ$                                | 90                                                             |
| Volume/Å <sup>3</sup>                          | 3082.8(2)                                                      |
| Z                                              | 8                                                              |
| $\rho_{\text{calc}}/\text{cm}^3$               | 1.737                                                          |
| $\mu/\text{mm}^{-1}$                           | 0.479                                                          |
| F(000)                                         | 1624.0                                                         |
| Crystal size/mm <sup>3</sup>                   | 0.709 × 0.614 × 0.567                                          |
| Radiation                                      | MoK $\alpha$ ( $\lambda$ = 0.71073)                            |
| 2 $\theta$ range for data collection/ $^\circ$ | 6.26 to 56.674                                                 |
| Index ranges                                   | -32 ≤ h ≤ 32, -9 ≤ k ≤ 9, -28 ≤ l ≤ 28                         |
| Reflections collected                          | 100114                                                         |
| Independent reflections                        | 3825 [ $R_{\text{int}}$ = 0.0364, $R_{\text{sigma}}$ = 0.0129] |
| Data/restraints/parameters                     | 3825/13/246                                                    |

Goodness-of-fit on  $F^2$  1.038  
 Final R indexes [ $I \geq 2\sigma(I)$ ]  $R_1 = 0.0283$ ,  $wR_2 = 0.0730$   
 Final R indexes [all data]  $R_1 = 0.0294$ ,  $wR_2 = 0.0740$   
 Largest diff. peak/hole /  $e \text{ \AA}^{-3}$  0.41/-0.35

## 5. References:

- 1) Breton, G. W.; Turlington, M. *Tetrahedron Lett.* **2014**, 55, 4661.
- 2) Nakagawa, K.; Konaka, R.; Nakata, T. *J. Org. Chem.* **1962**, 27, 1597.
- 3) Murphy, A.; Stack, T.D.P. *J. Mol. Catal. A* **2006**, 251, 78.
- 4) Vyas, D.M.; Chiang, Y.; Doyle, T.W. *Tetrahedron Lett.* **1984**, 25, 487.
- 5) Zarate, C.; Martin, R. *J. Am. Chem. Soc.* **2014**, 136, 2236–2239.
- 6) Moretti, R. A.; Du Bois, J.; Stack, T. D. P. *Org. Lett.* **2016**, 18, 2528.
- 7) Gillard, J. R.; Newlands, M. J.; Bridson, J. N.; Burnell, D. J. *Can. J. Chem.* **1991**, 69, 1337.
- 8) Kreiter, C. G.; Özkar, S. *J. Organomet. Chem.* **1977**, 129, C14.
- 9) Maimone, T. J.; Shi, J.; Ashida, S.; Baran, P. S. *J. Am. Chem. Soc.* **2009**, 131, 17066.
- 10) Varela-Fernandez, A.; García-Yebra, C.; Varela, J. A.; Esteruelas, M. A.; Saa, C. *Angew. Chem., Int. Ed.* **2010**, 49, 4278.
- 11) G. Ahmed, A. Bohnstedt, H. J. Breslin, J. Burke, M. A. Curry, J. L. Diebold, B. Dorsey, B. J. Dugan, D. Feng, D. E. Gingrich, T. Guo, K.-K. Ho, K. S. Learn, J. G. Lisko, R.-Q. Liu, E. F. Mesaros, K. Milkiewicz, G. R. Ott, J. Parrish, J. P. Theroff, T. V. Thieu, R. Tripathy, T. L. Underiner, J. C. Wagner, L. Weinberg, G. J. Wells, M. You, C. A. Zifcsak, PCT Int. Appl. WO 2008051547 February 5, 2008.
- 12) Haidzinskaya, T.; Kerchner, H. A.; Liu, J.; Watson, M. P. *Org. Lett.* **2015**, 17, 3857.
- 13) Sheldrick, G. M. *Acta Cryst.* **2015**, A71, 3-8.
- 14) Sheldrick, G. M. *Acta Cryst.* **2008**, A64, 112-122.
- 15) Dolomanov, O.V.; Bourhis, L. J.; Gildea, R.J.; Howard, J. A. K.; Puschmann, H. *J. Appl. Cryst.* **2009**, 42, 339-341

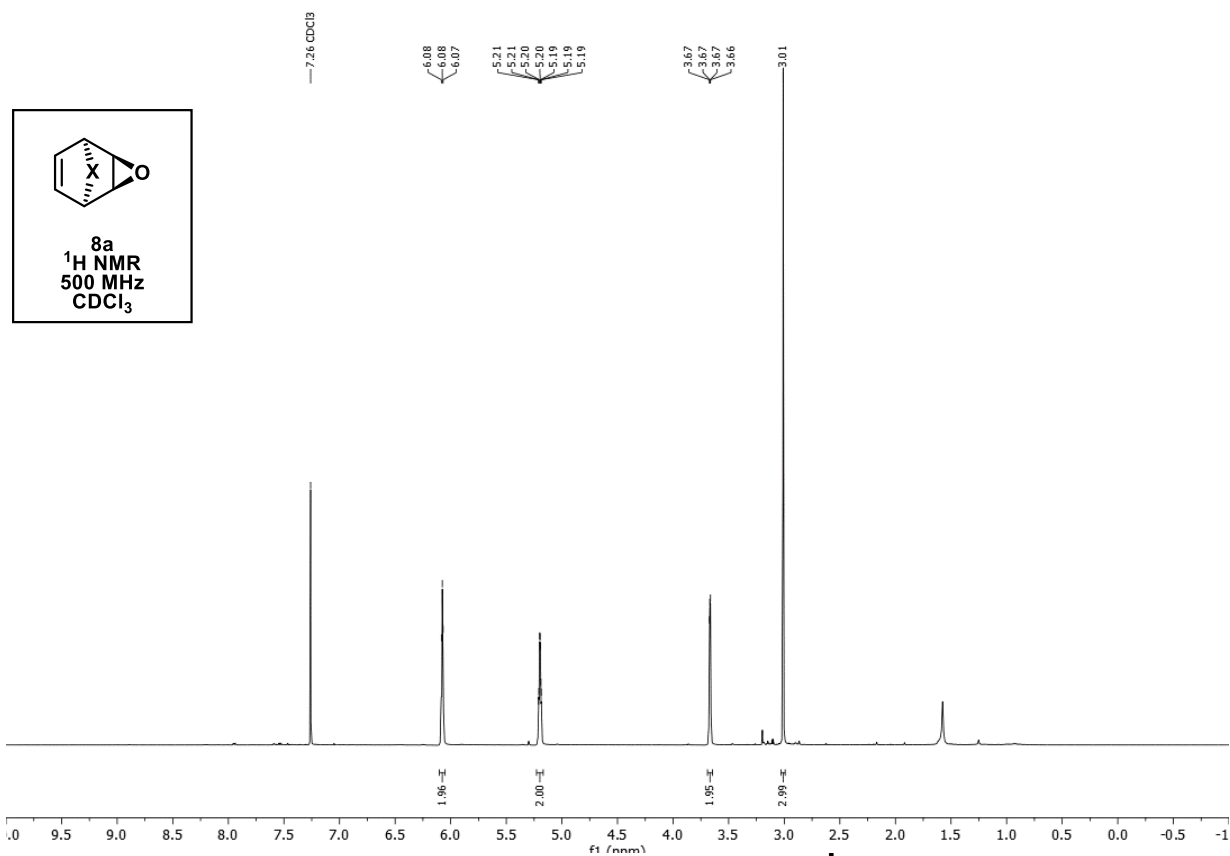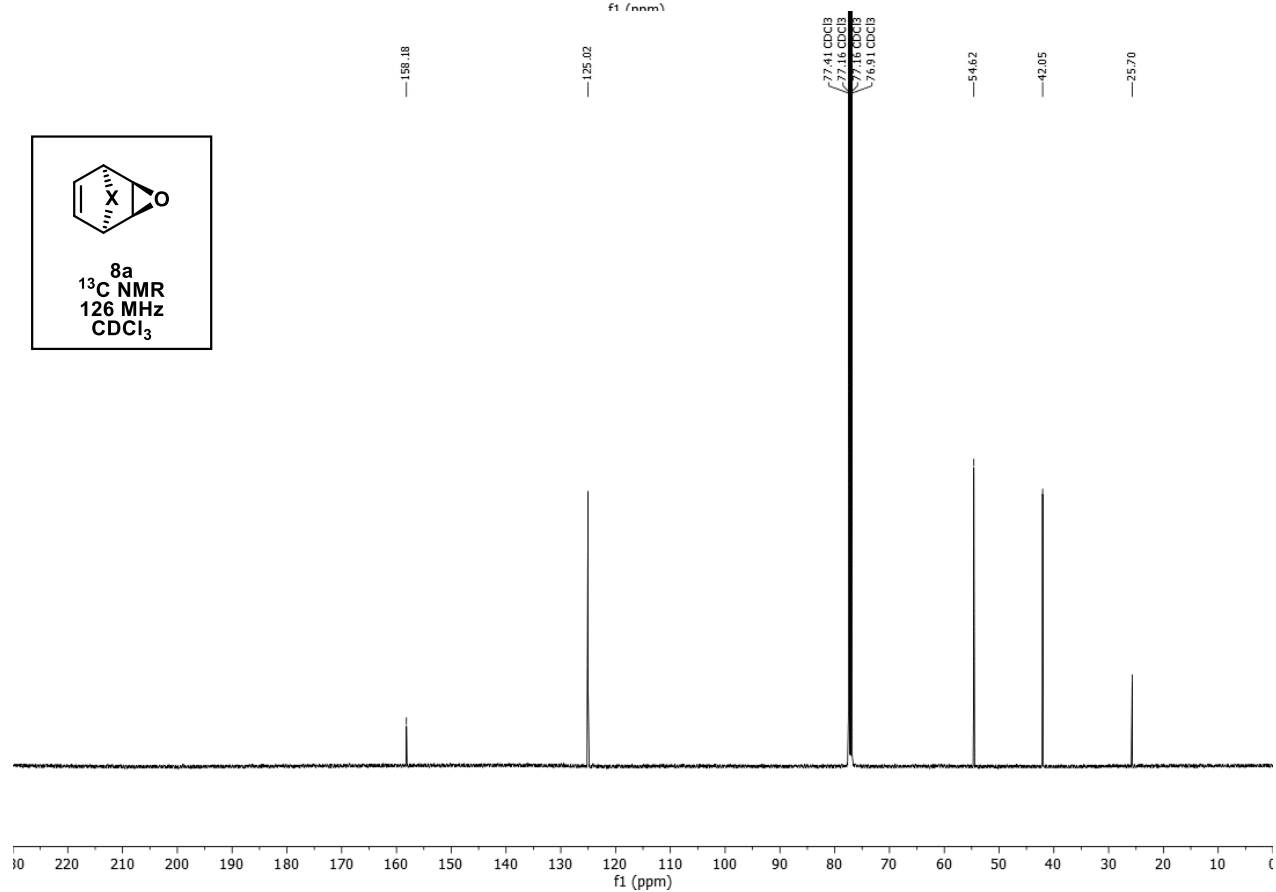

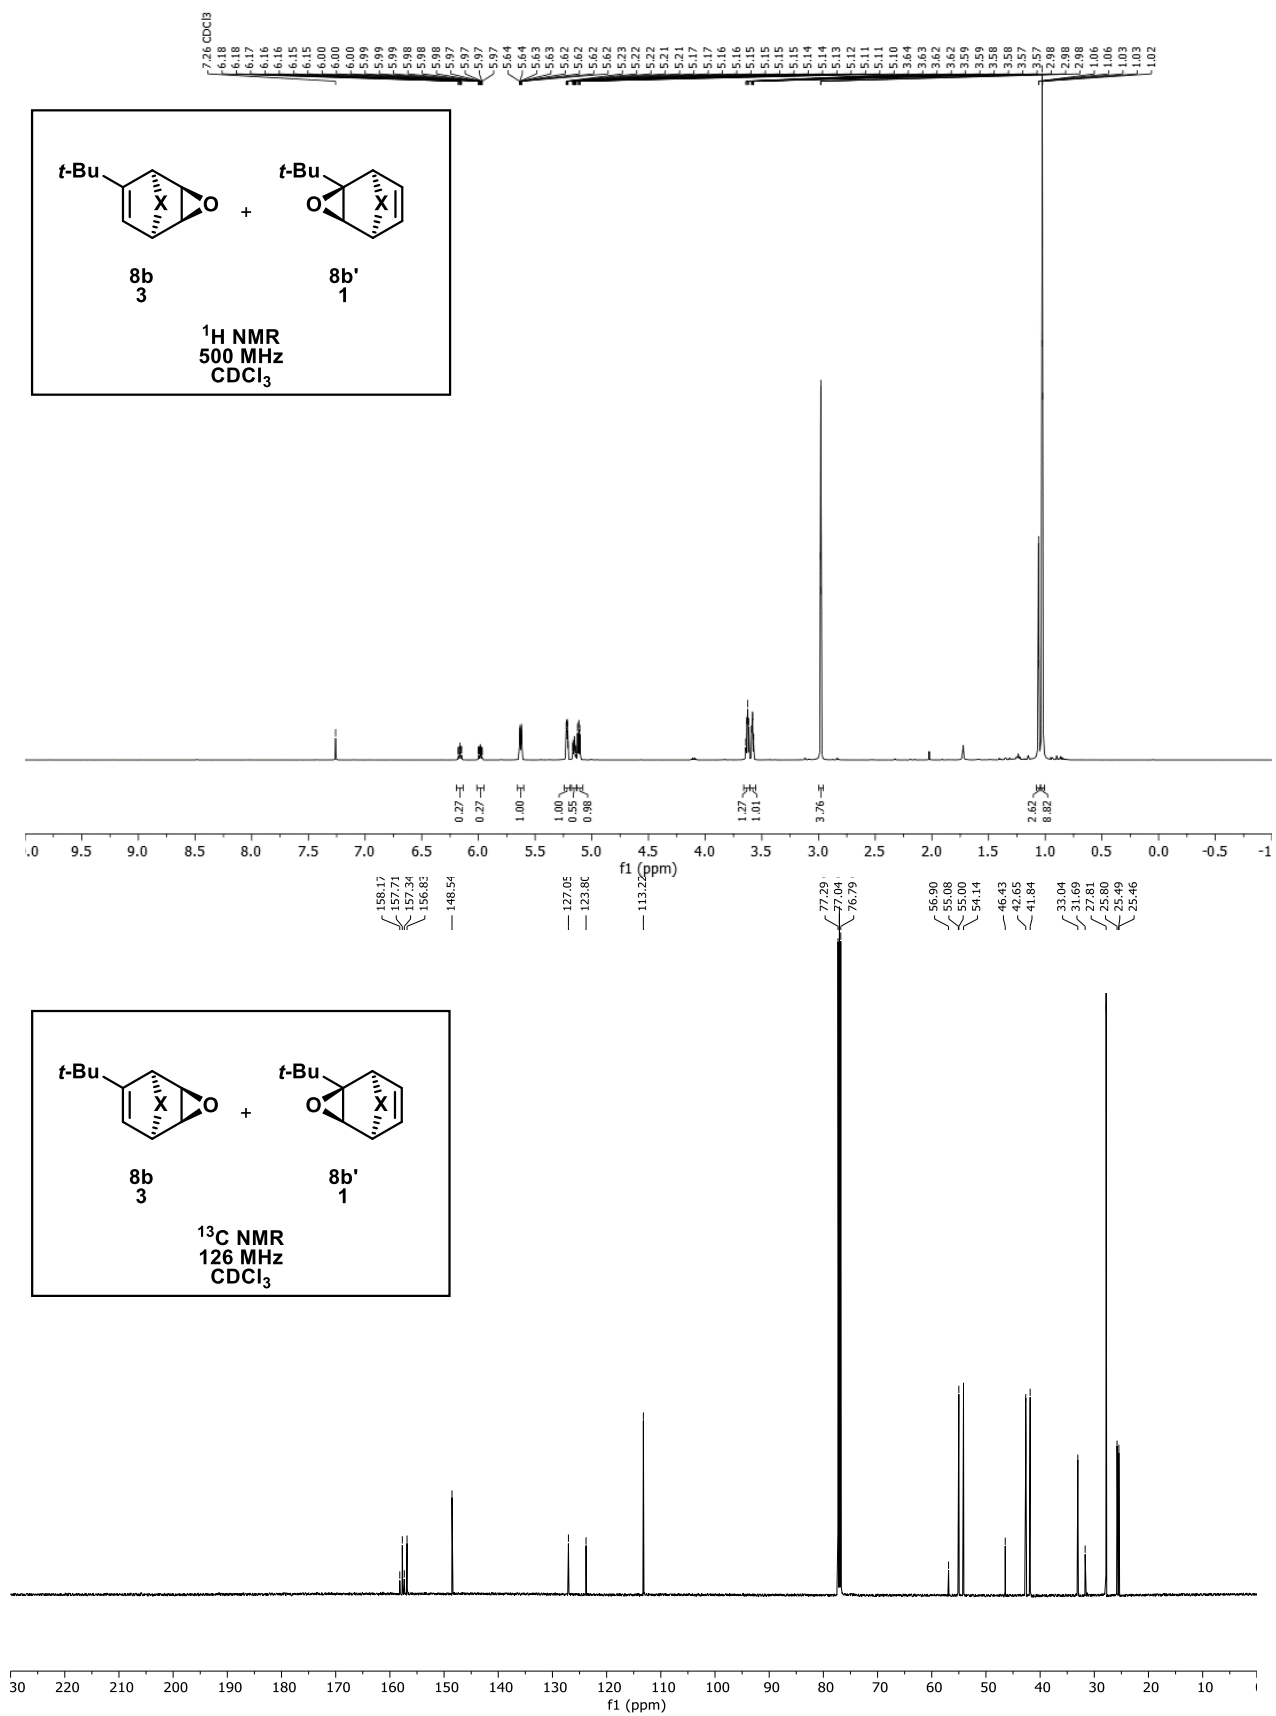



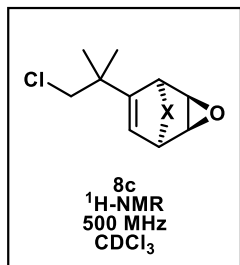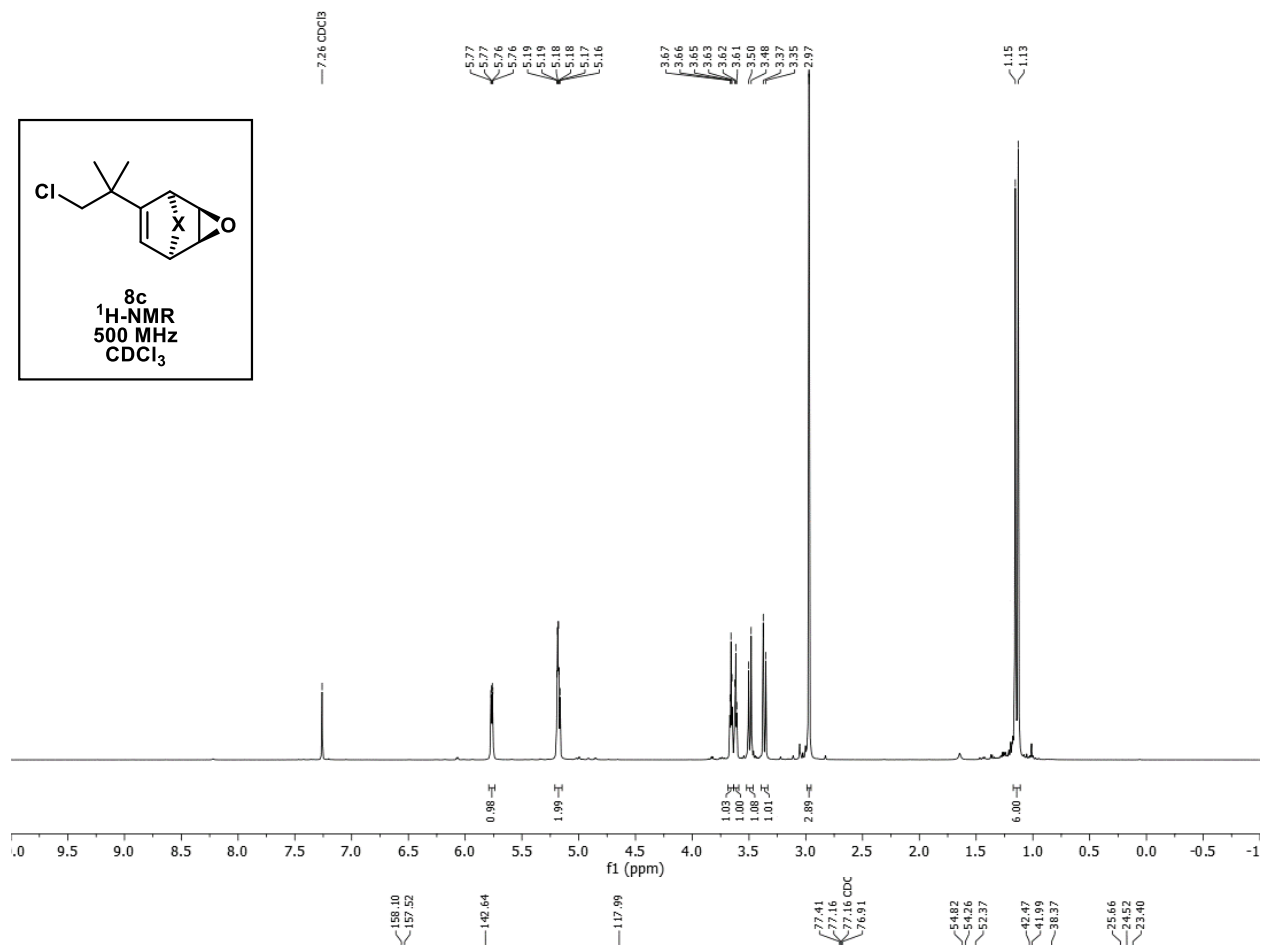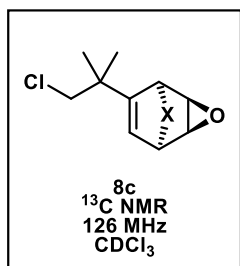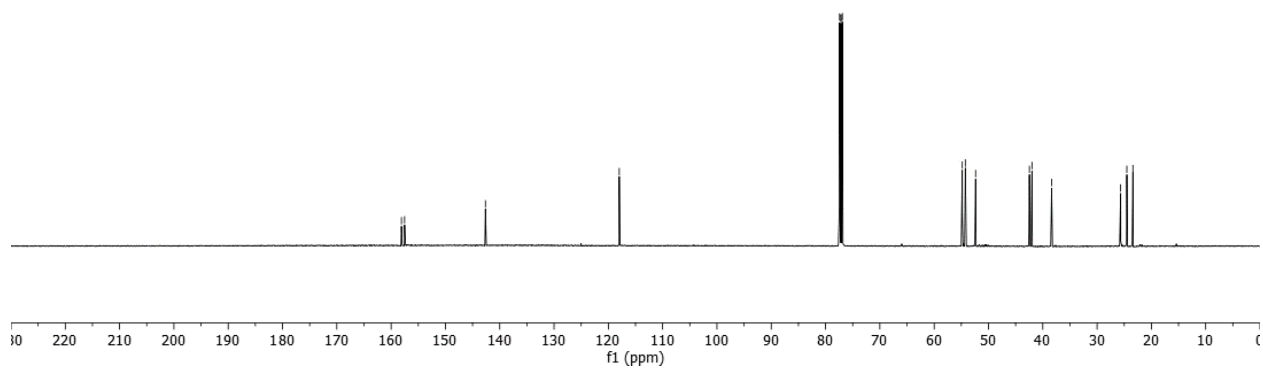

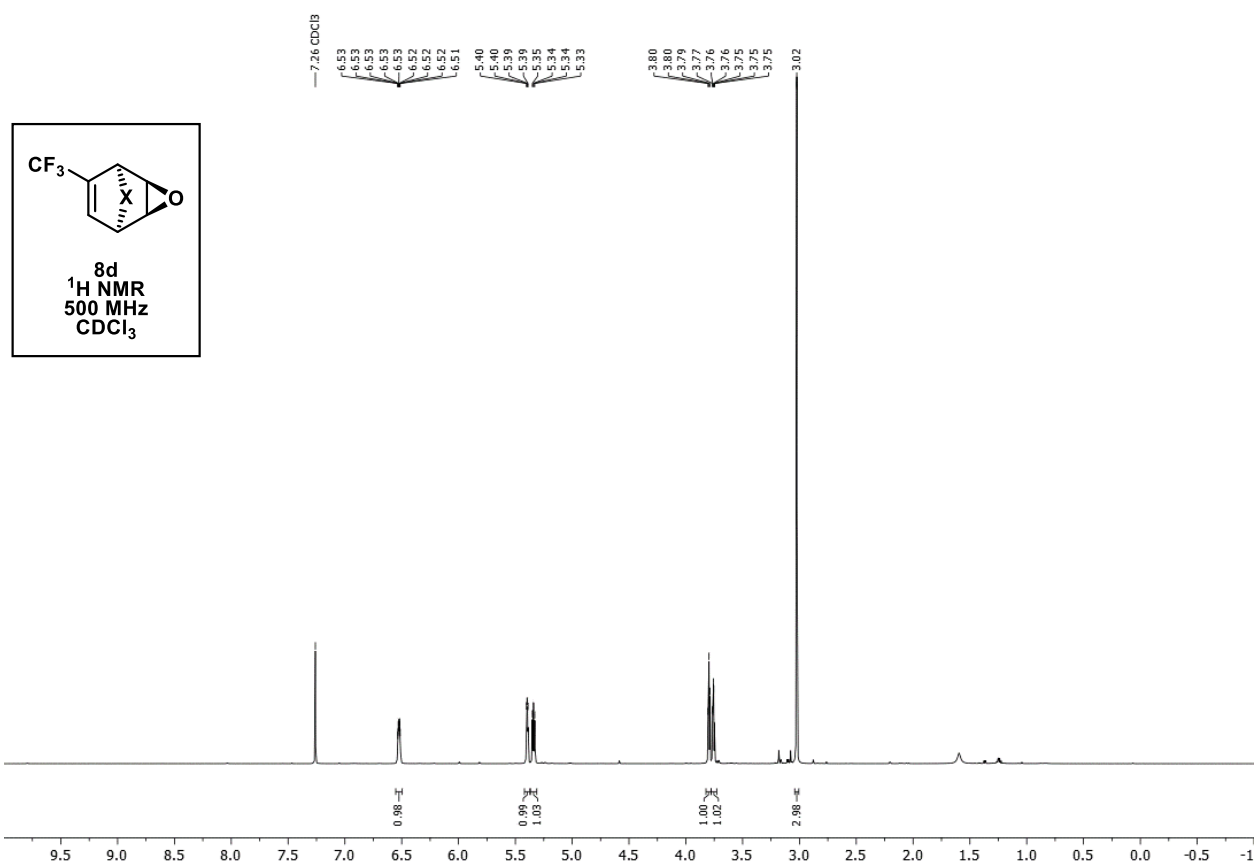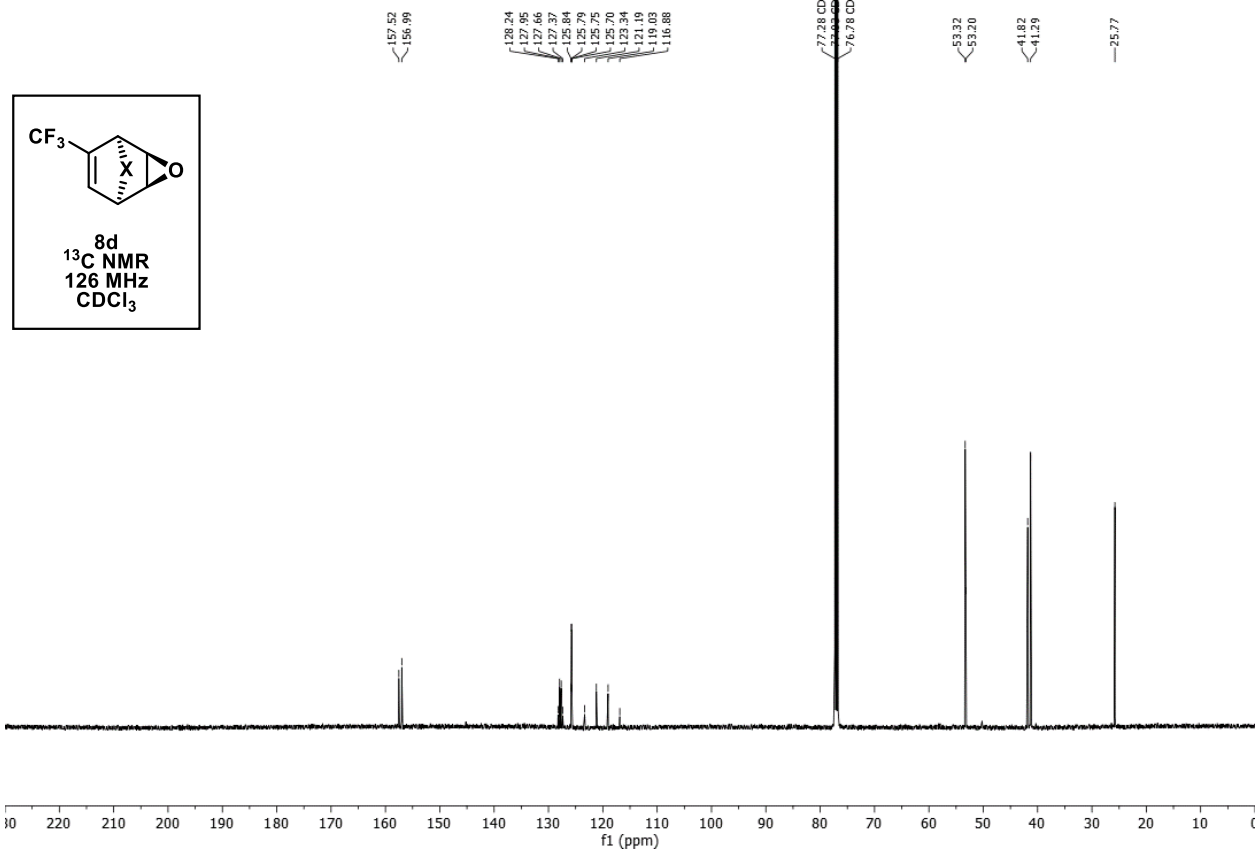

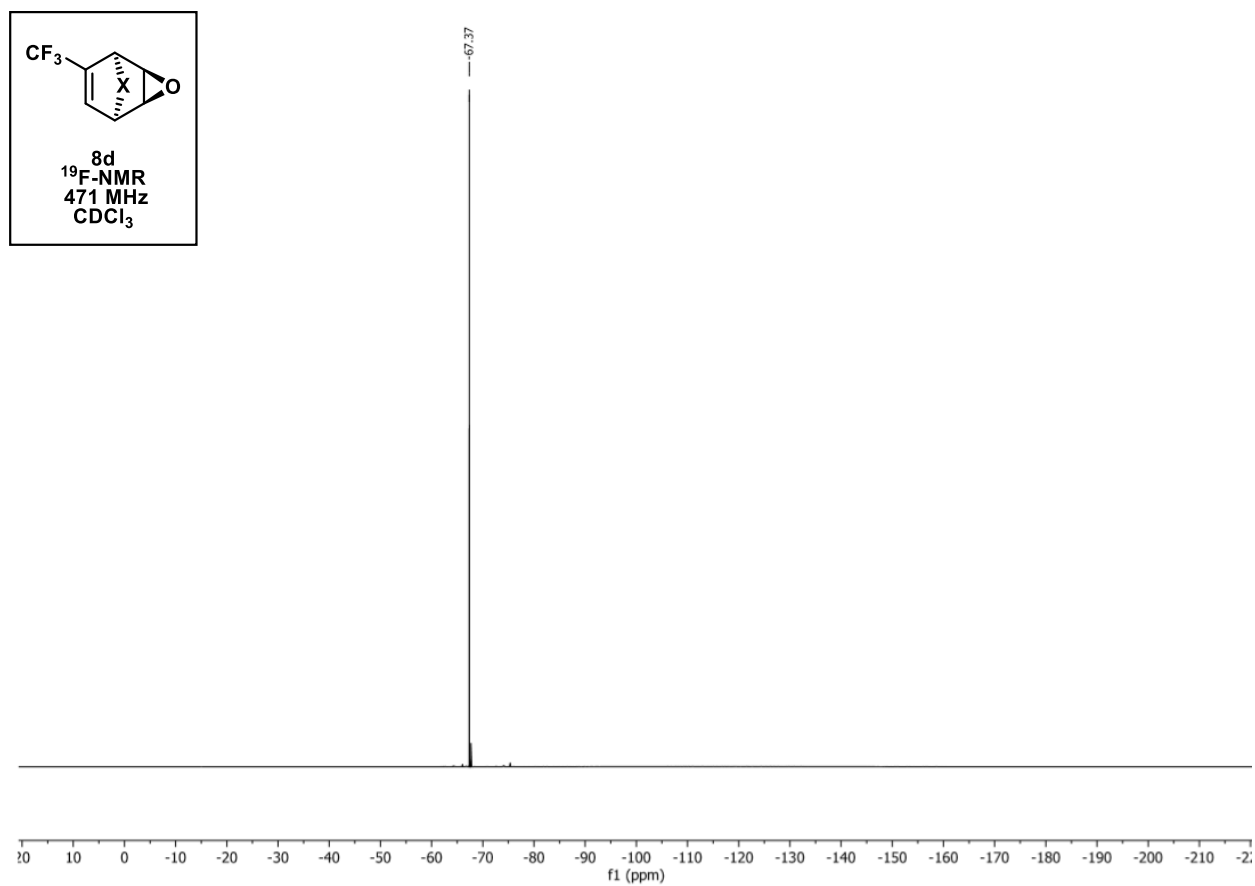

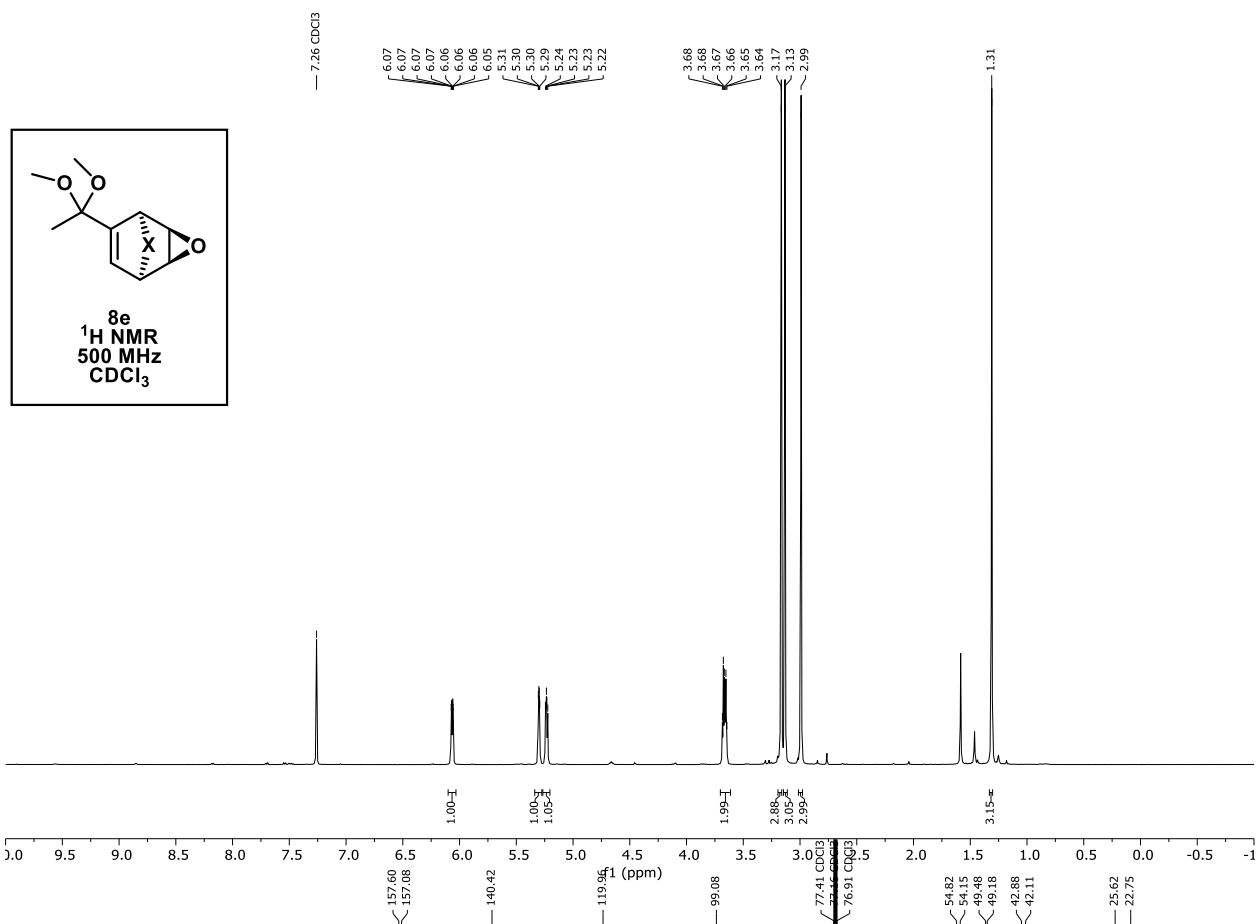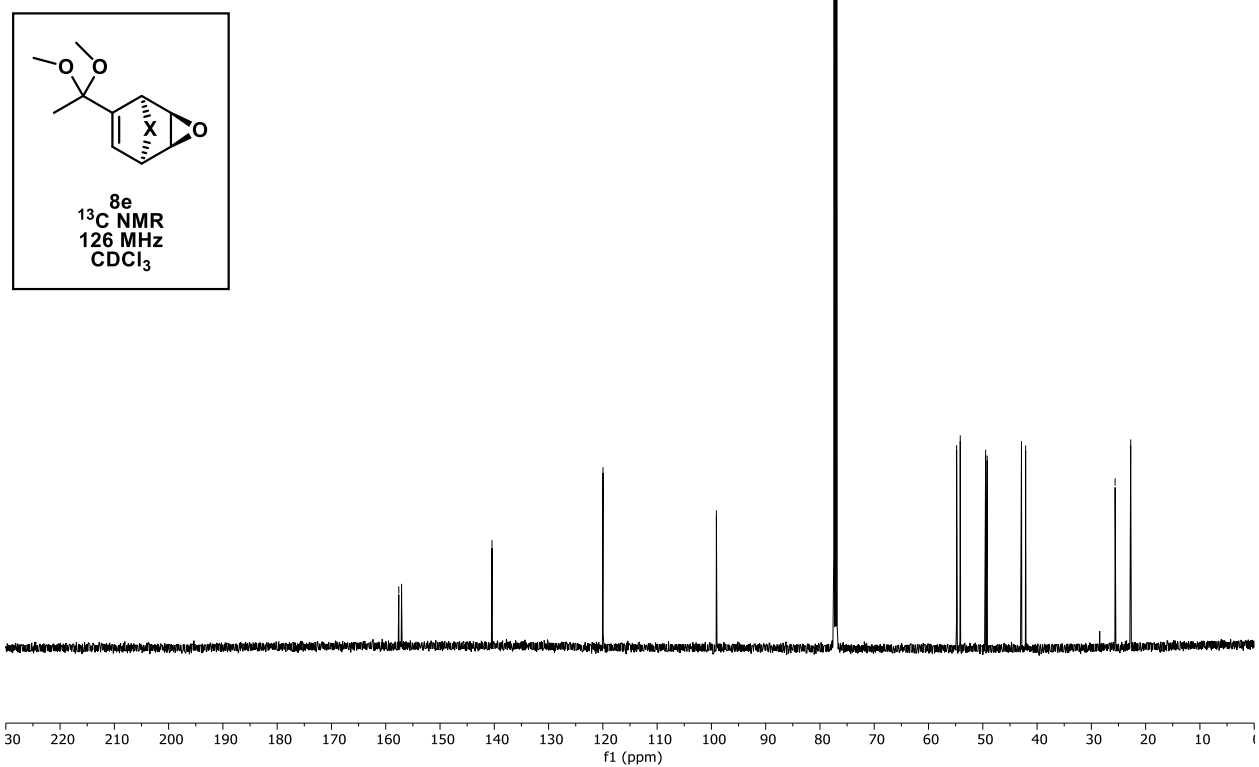

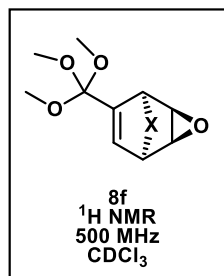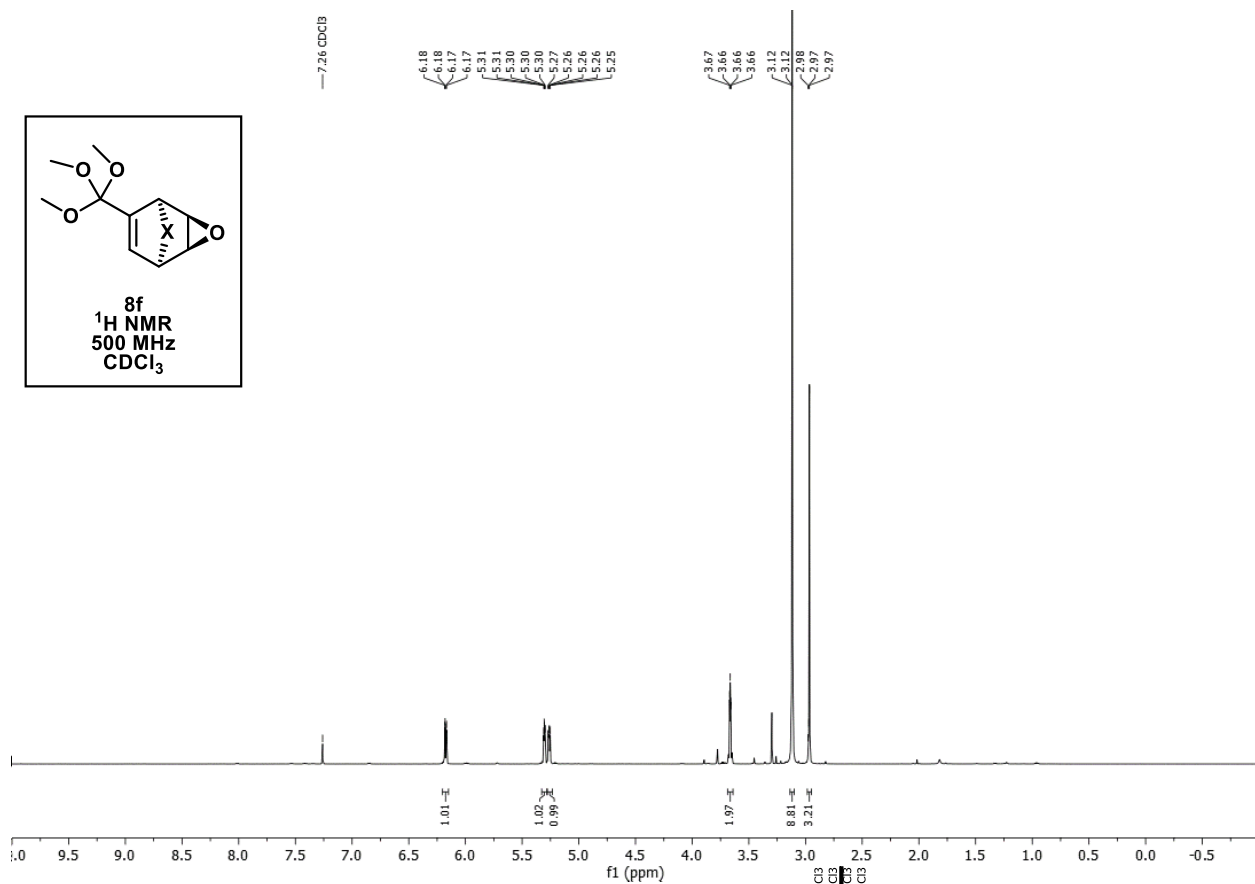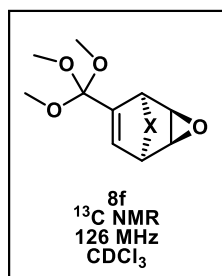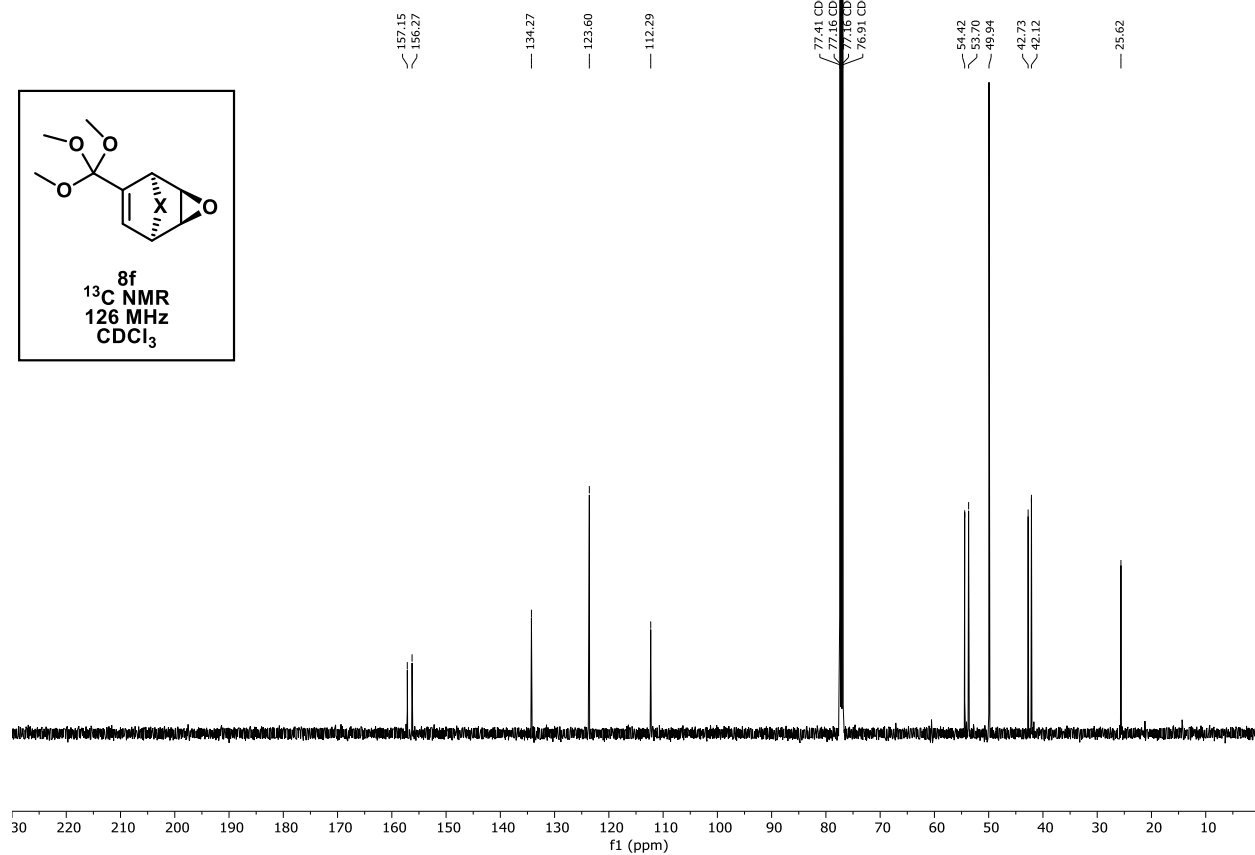

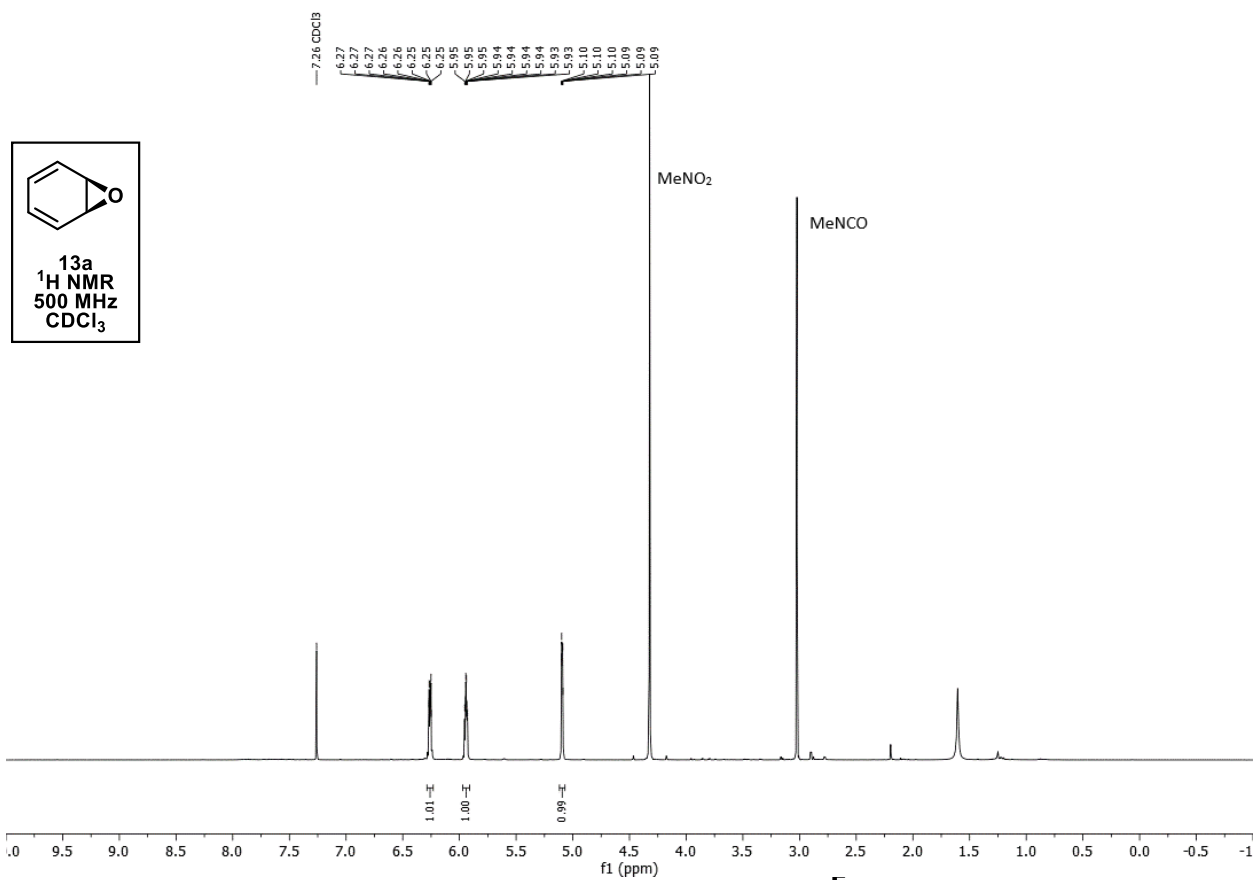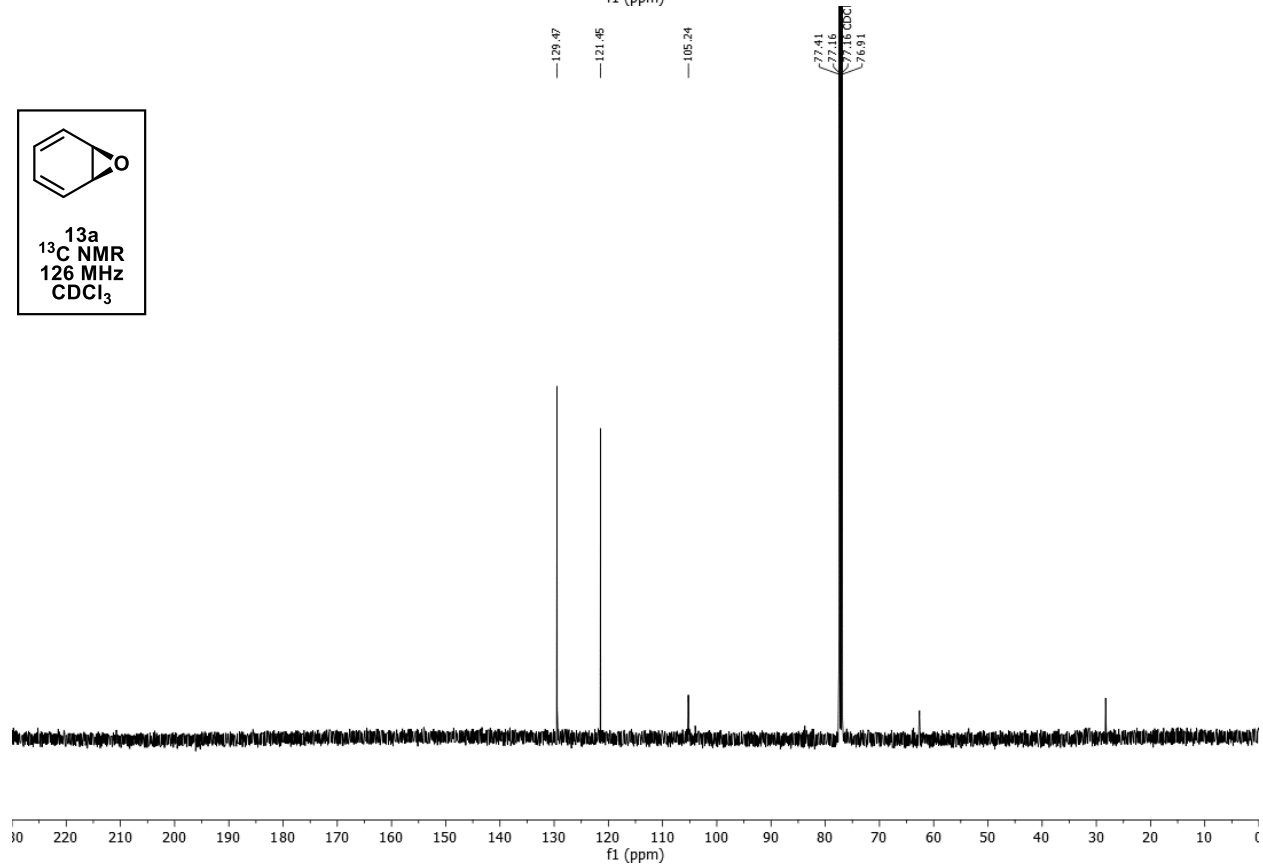

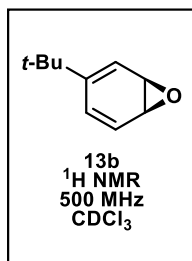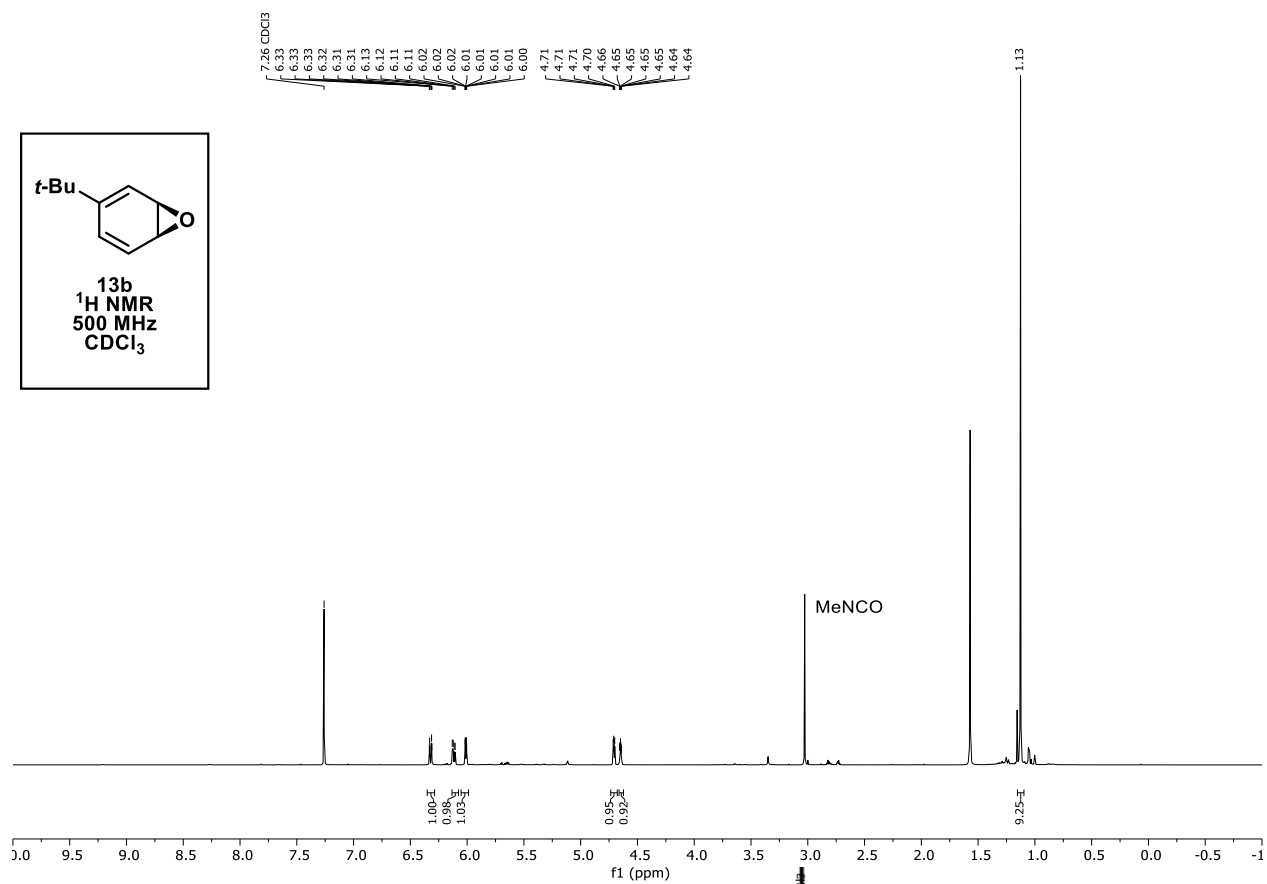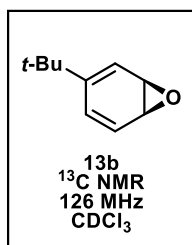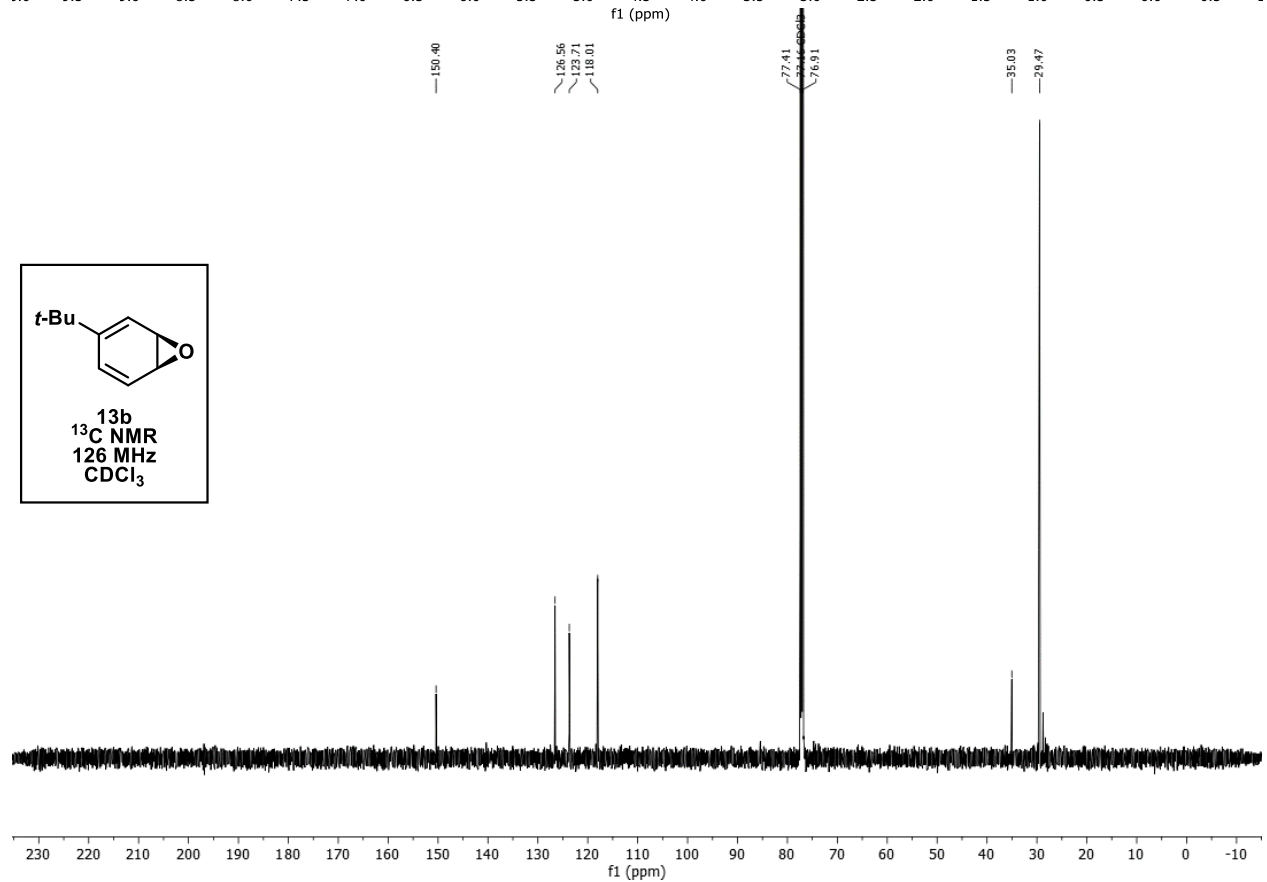

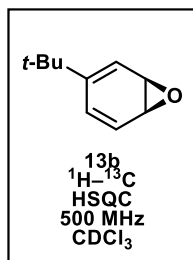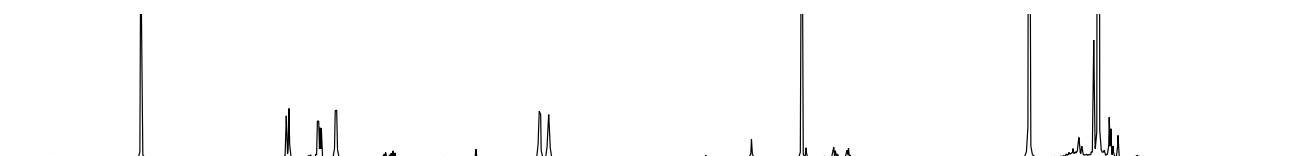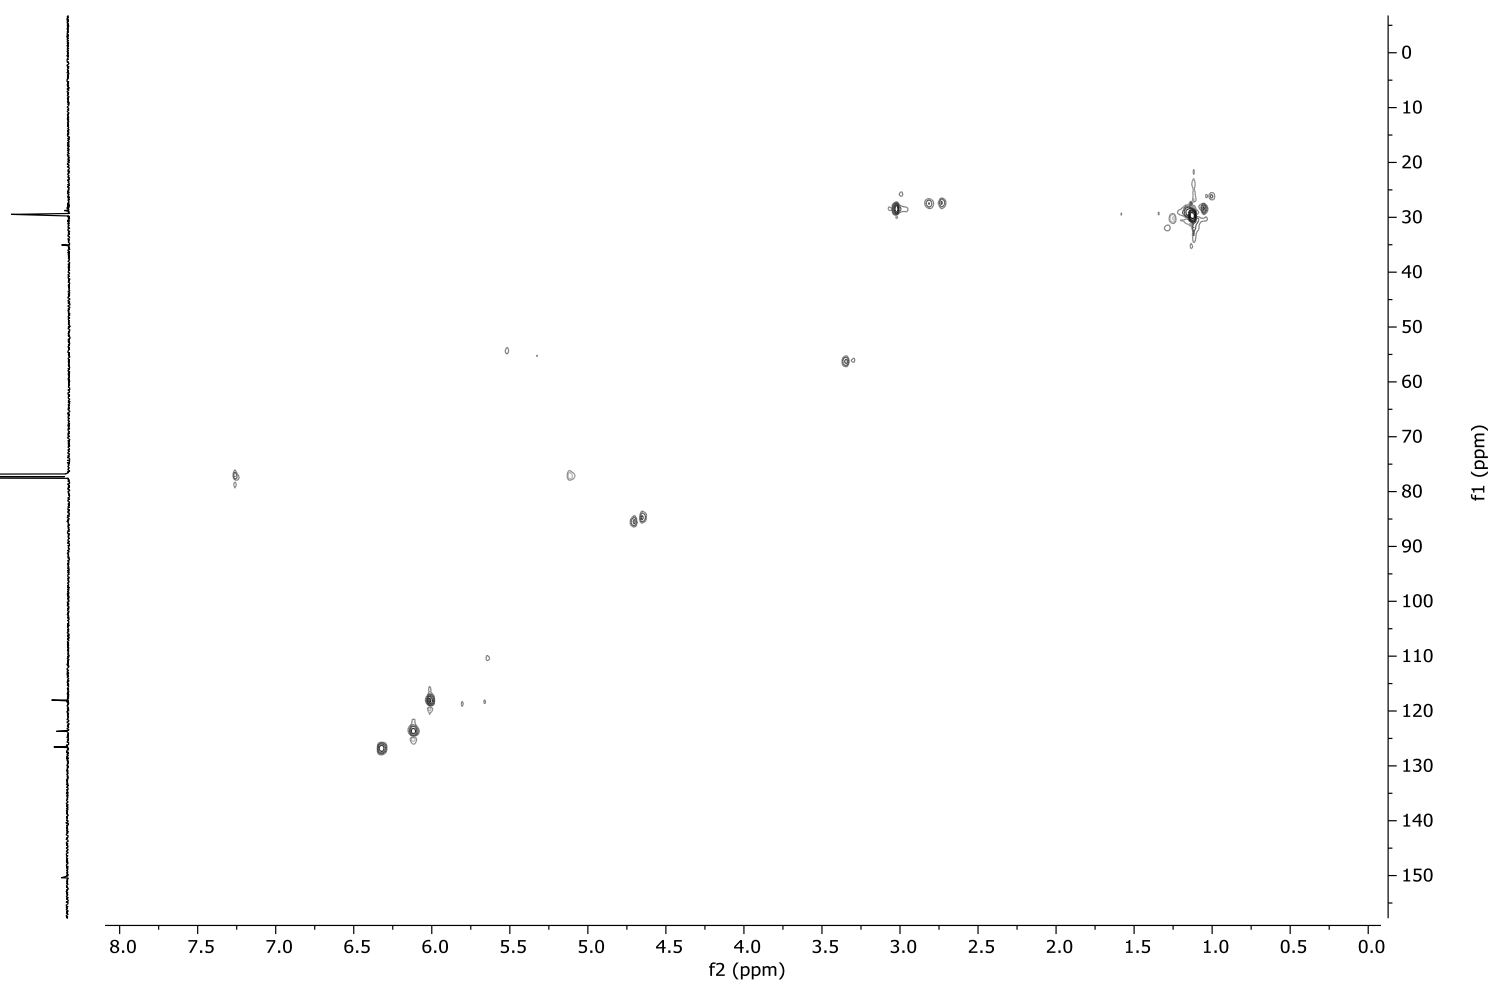



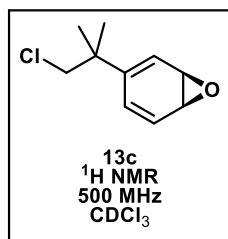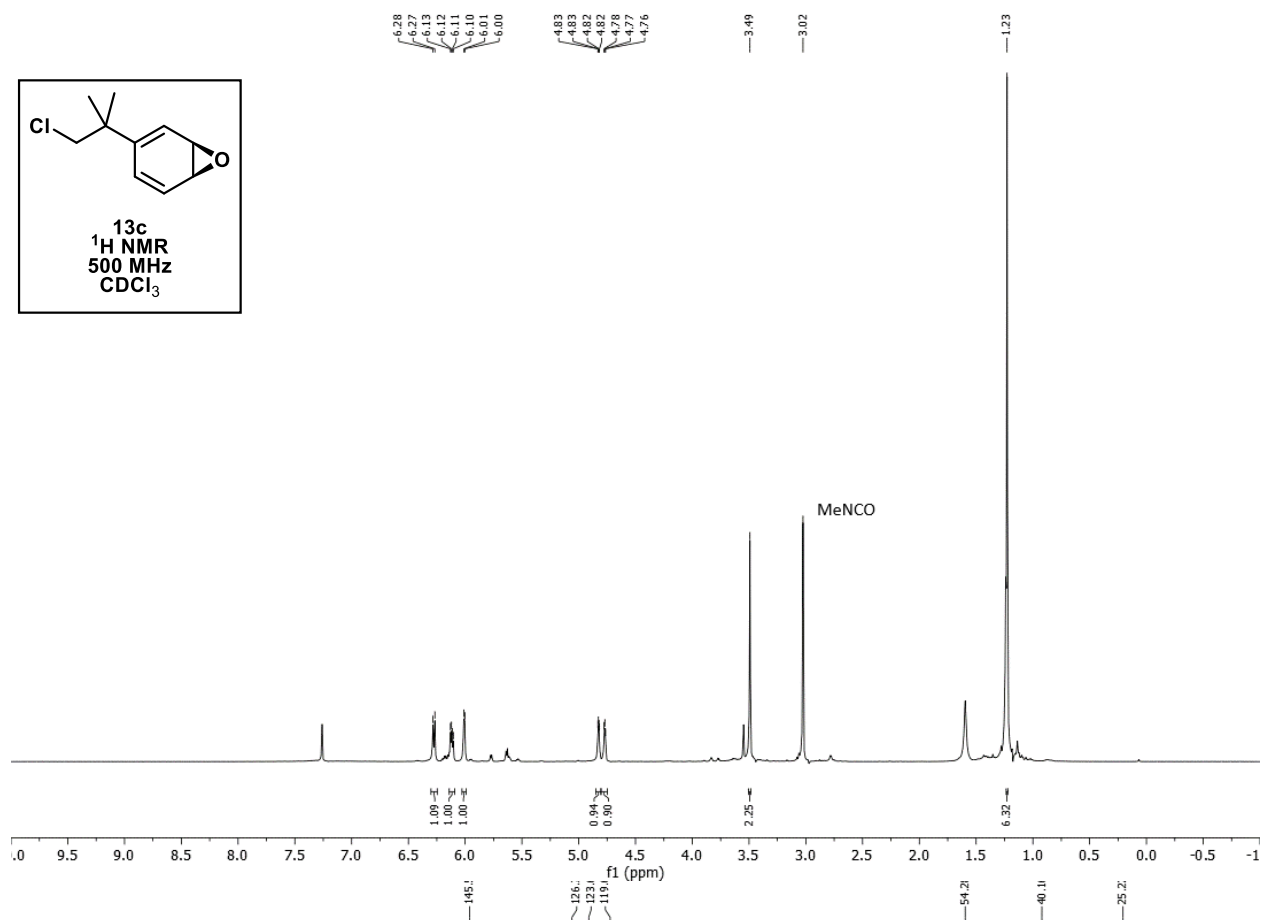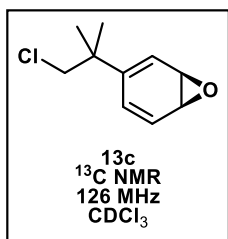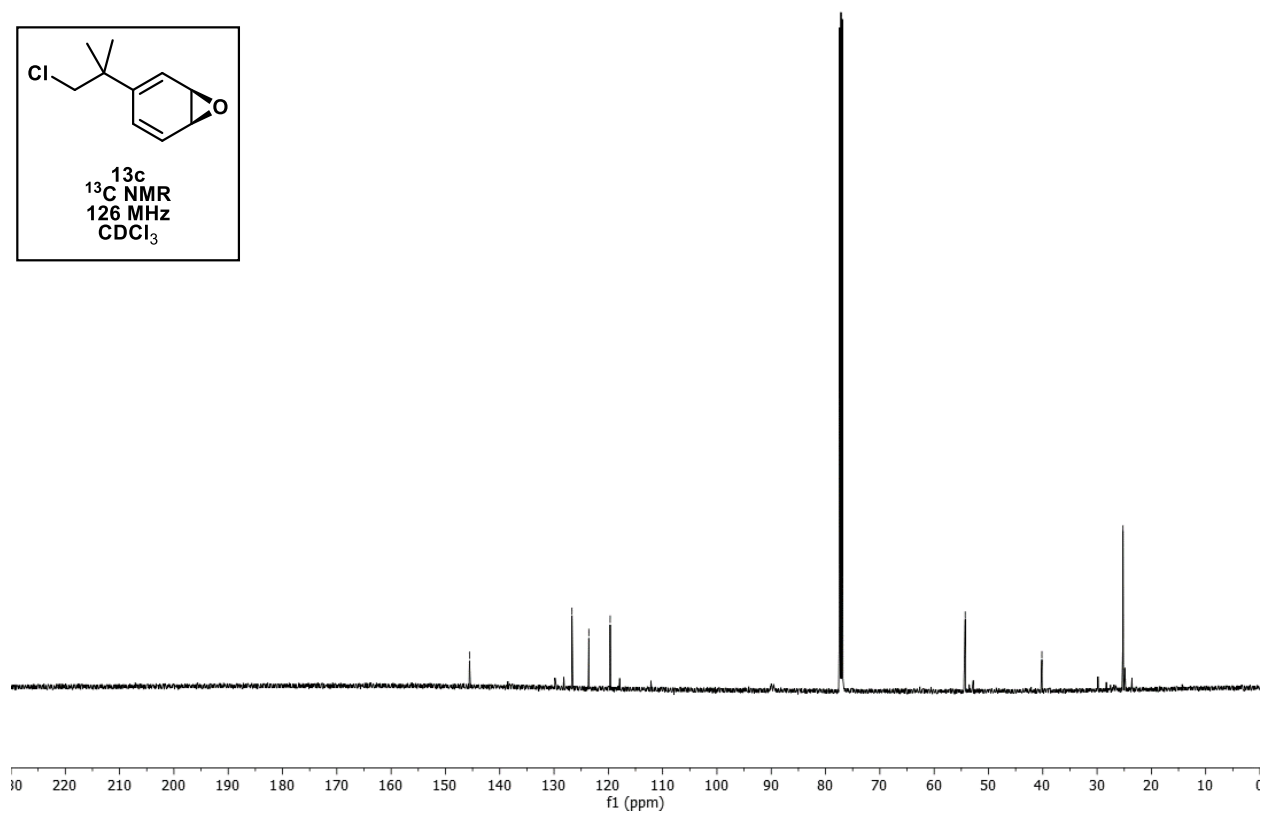

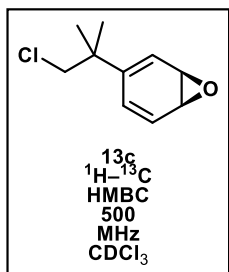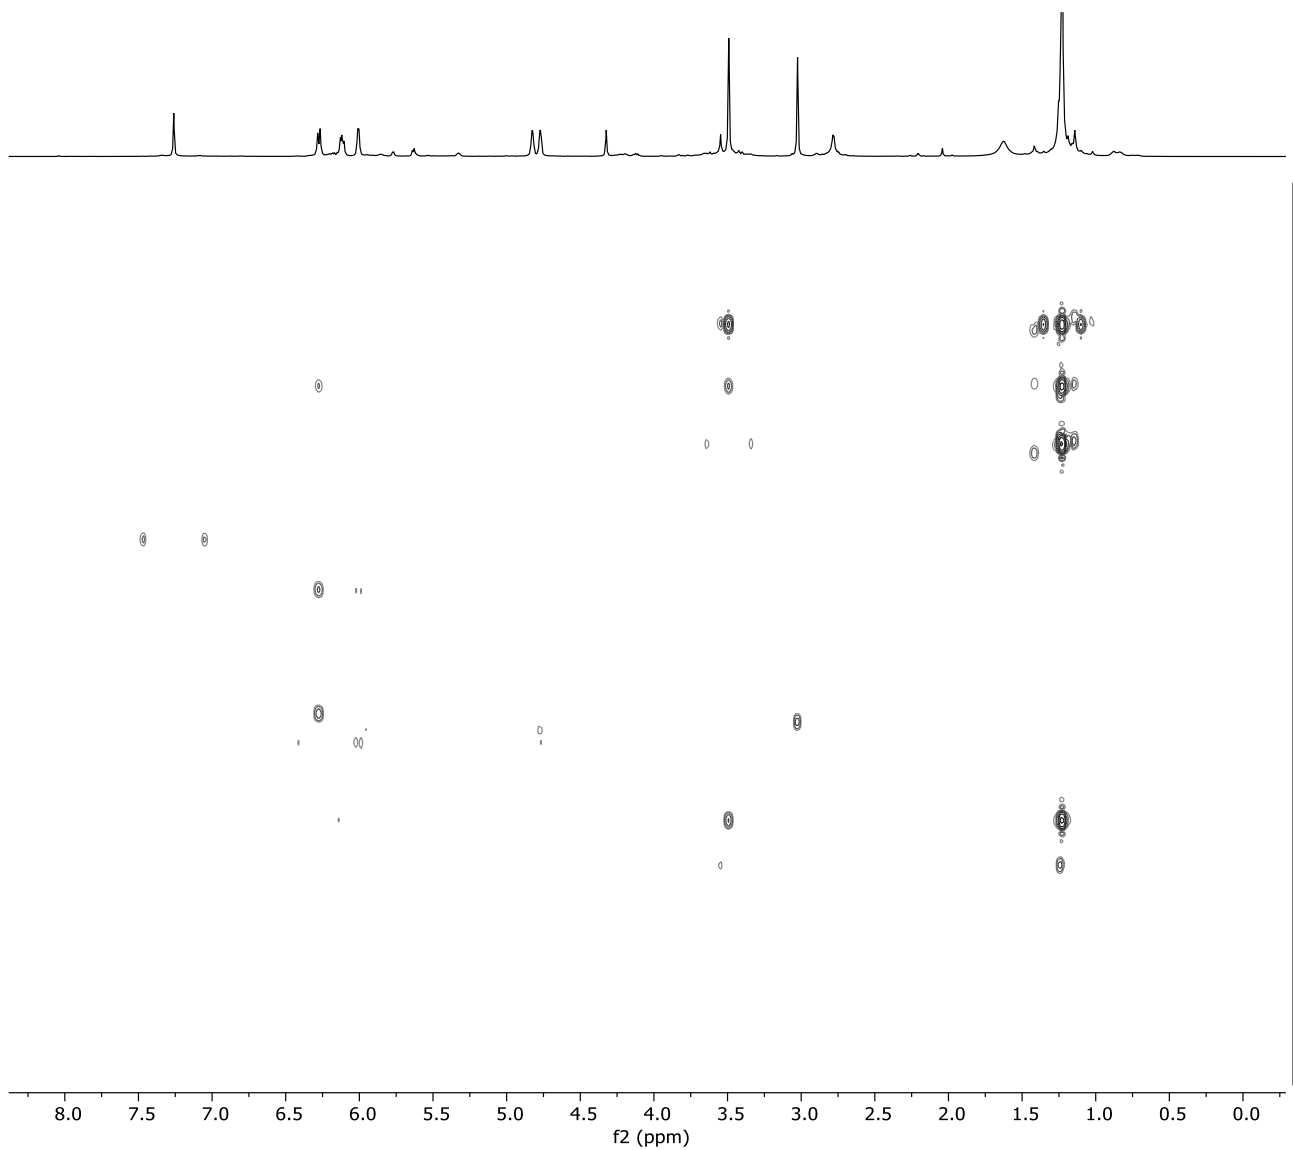

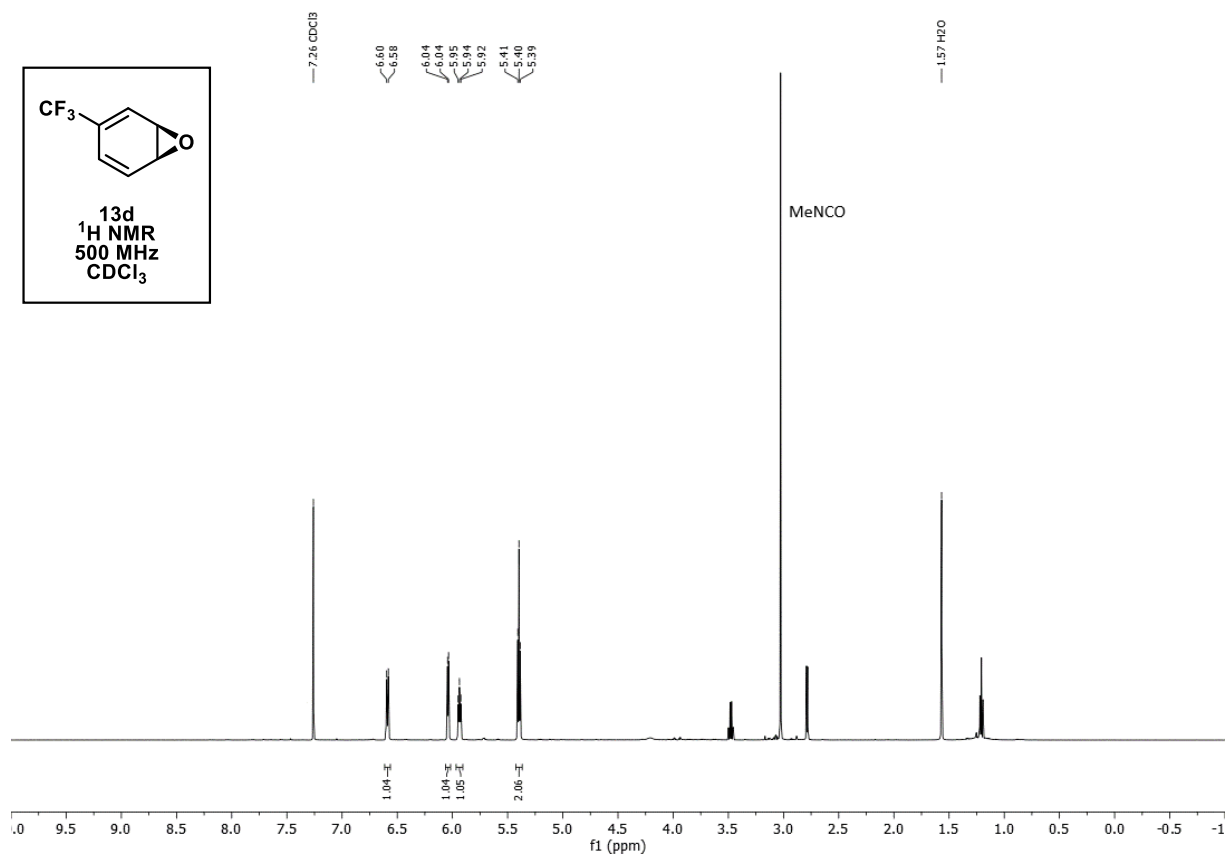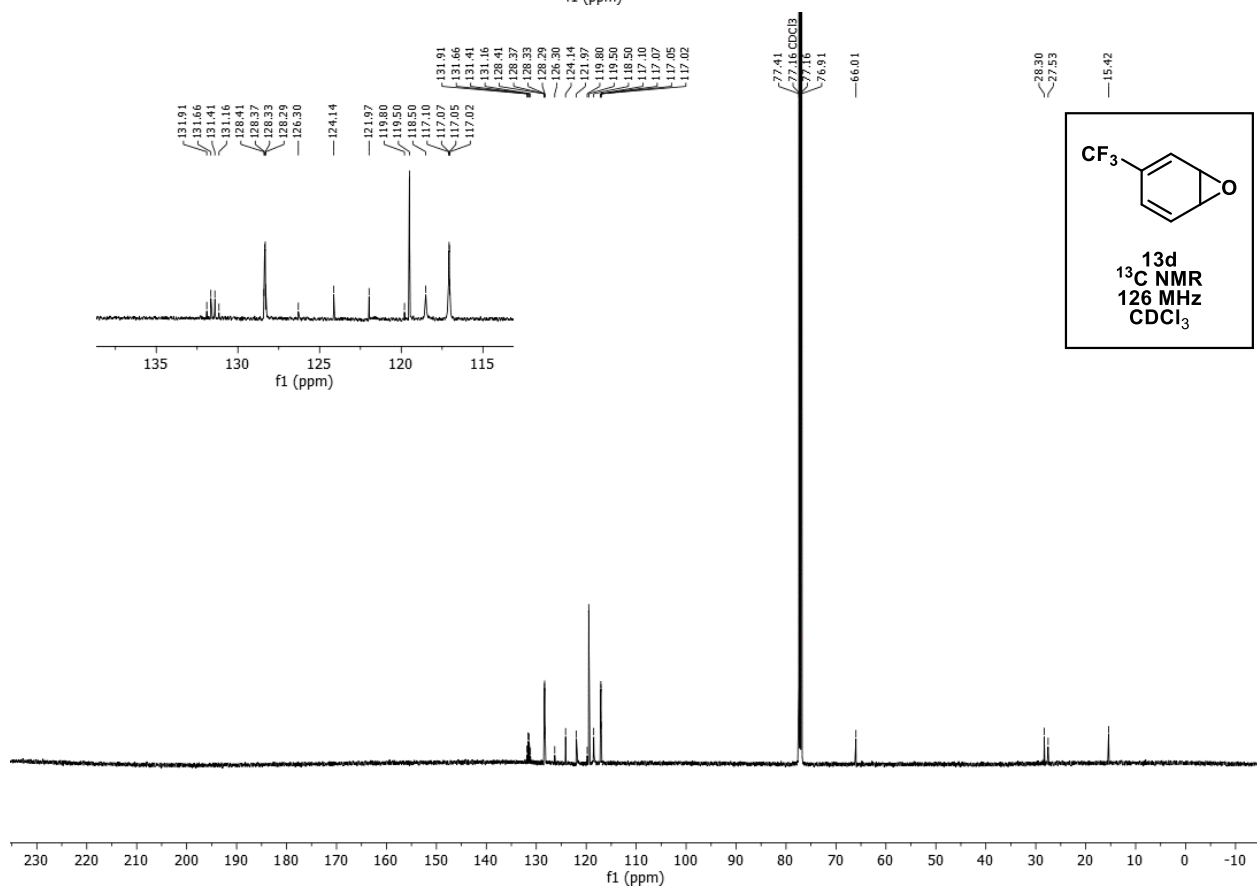

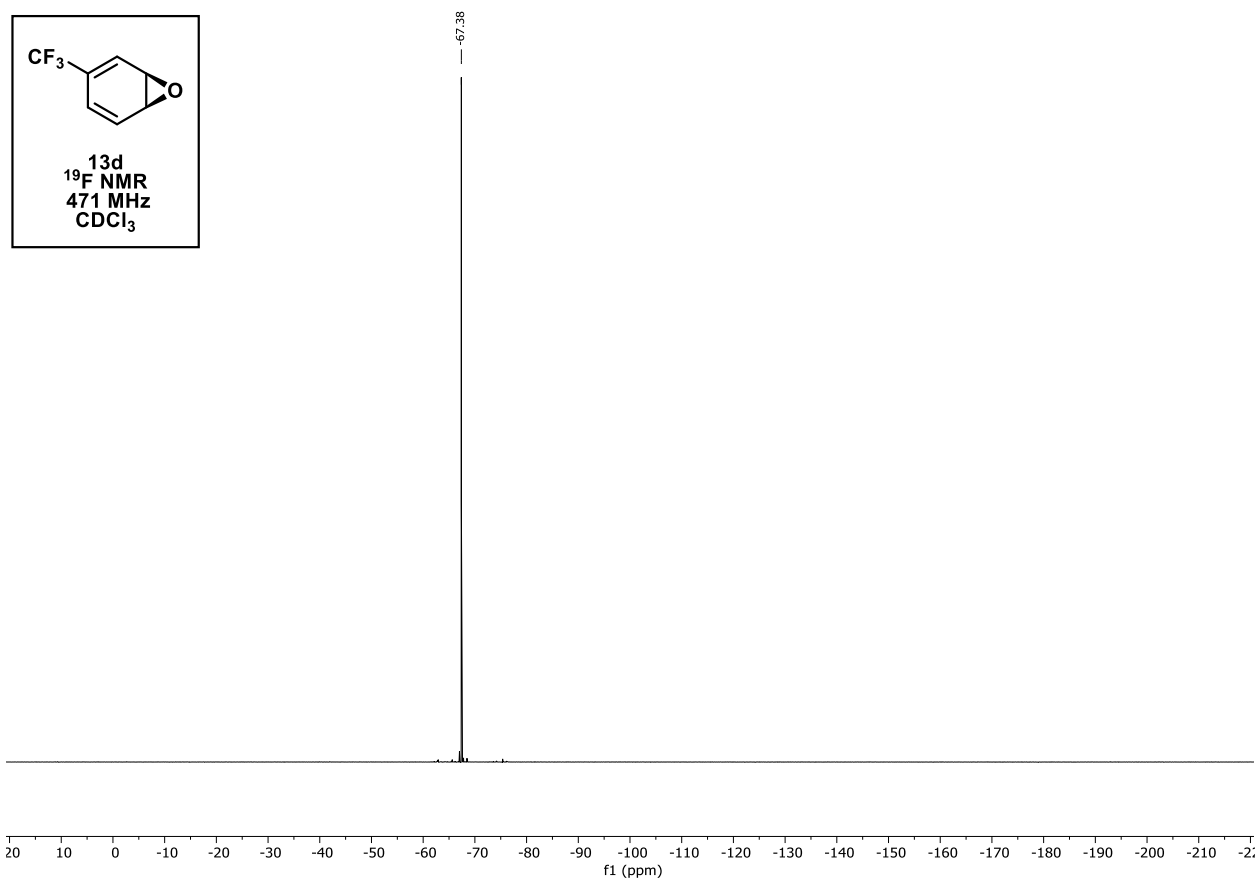

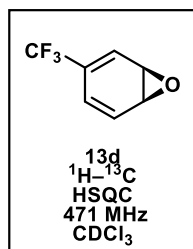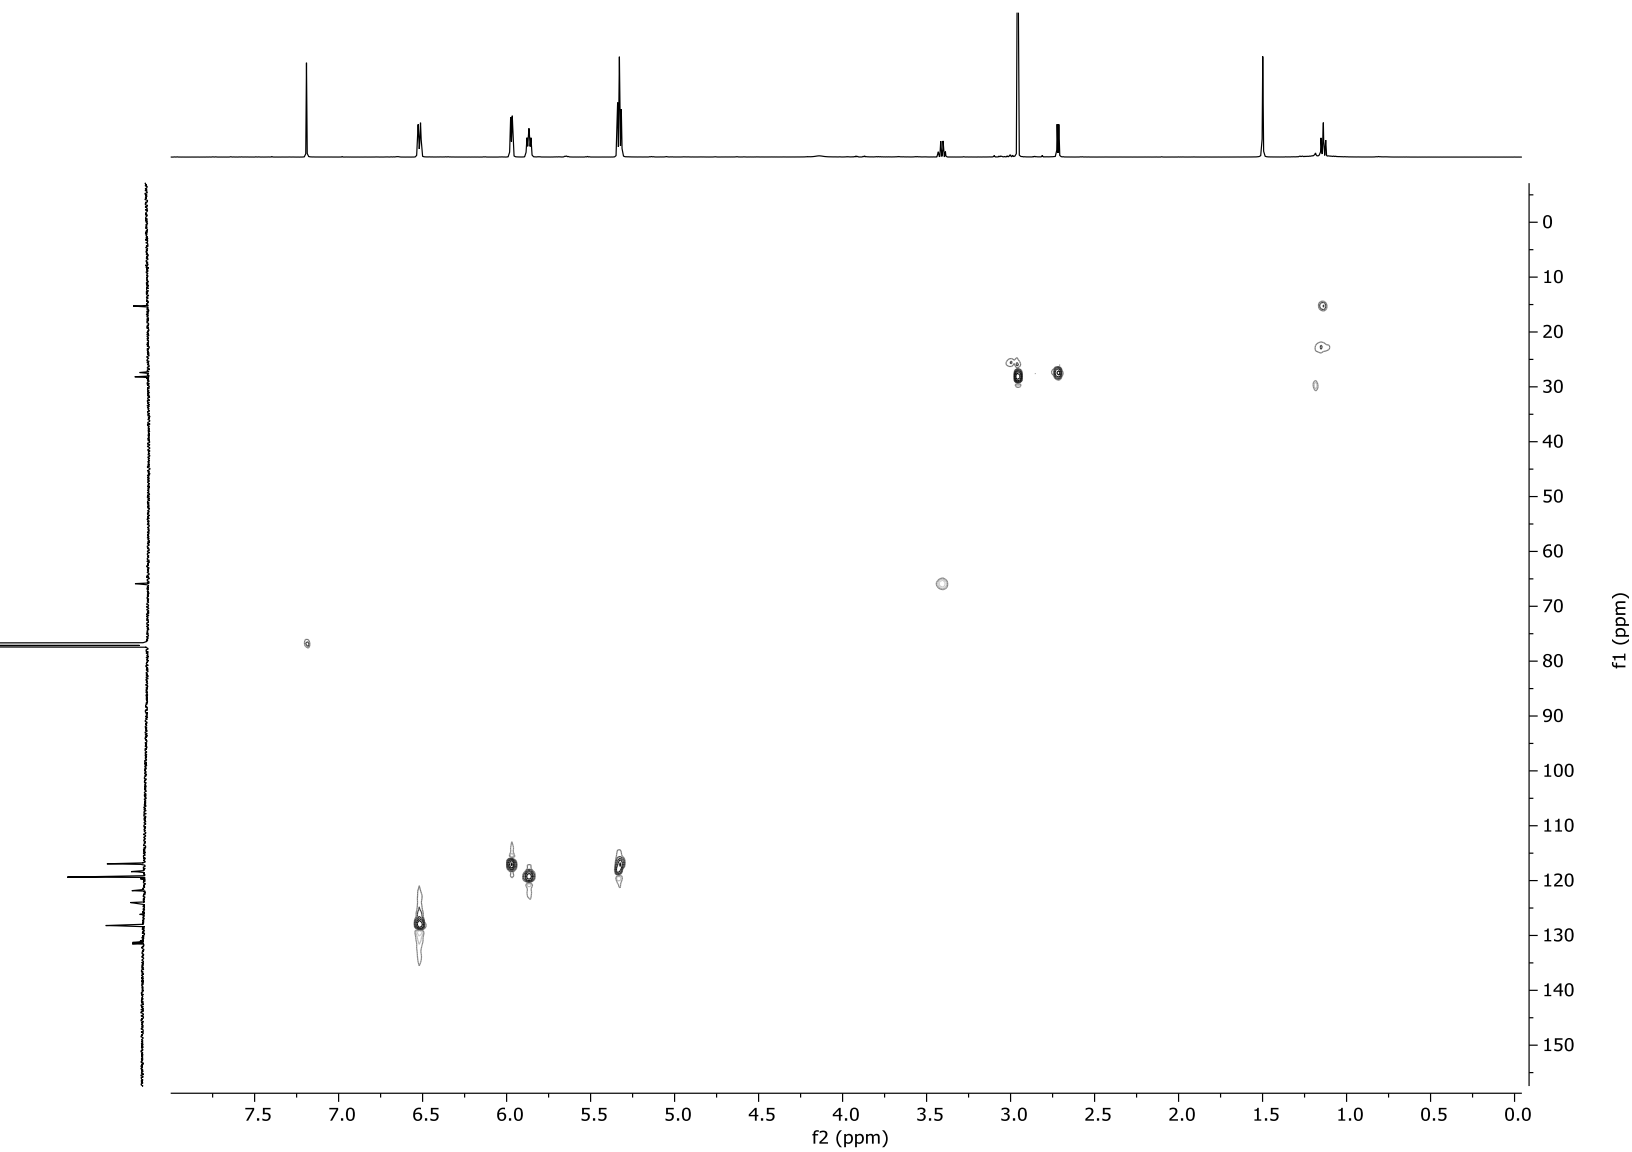

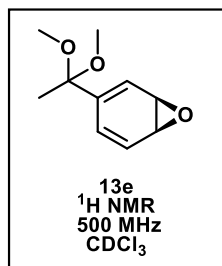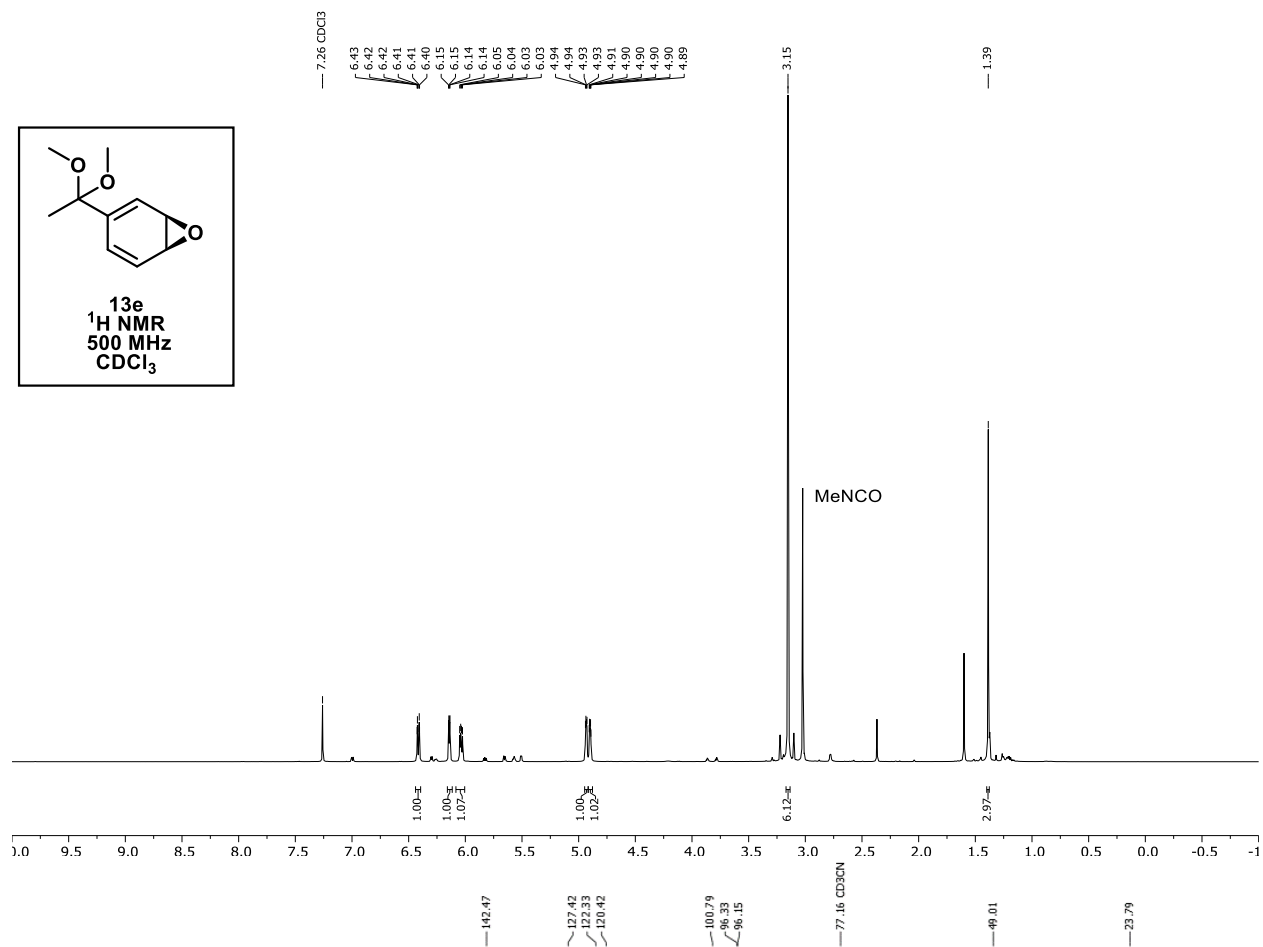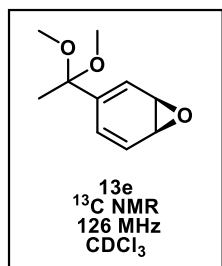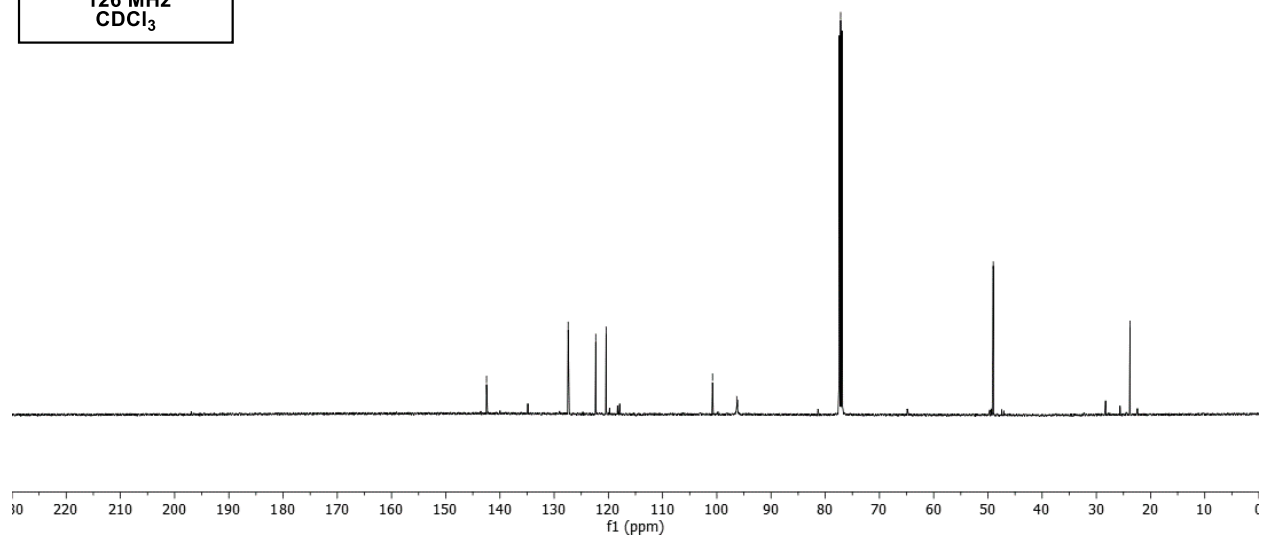

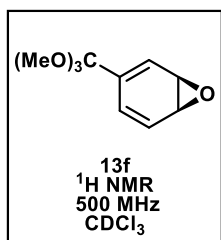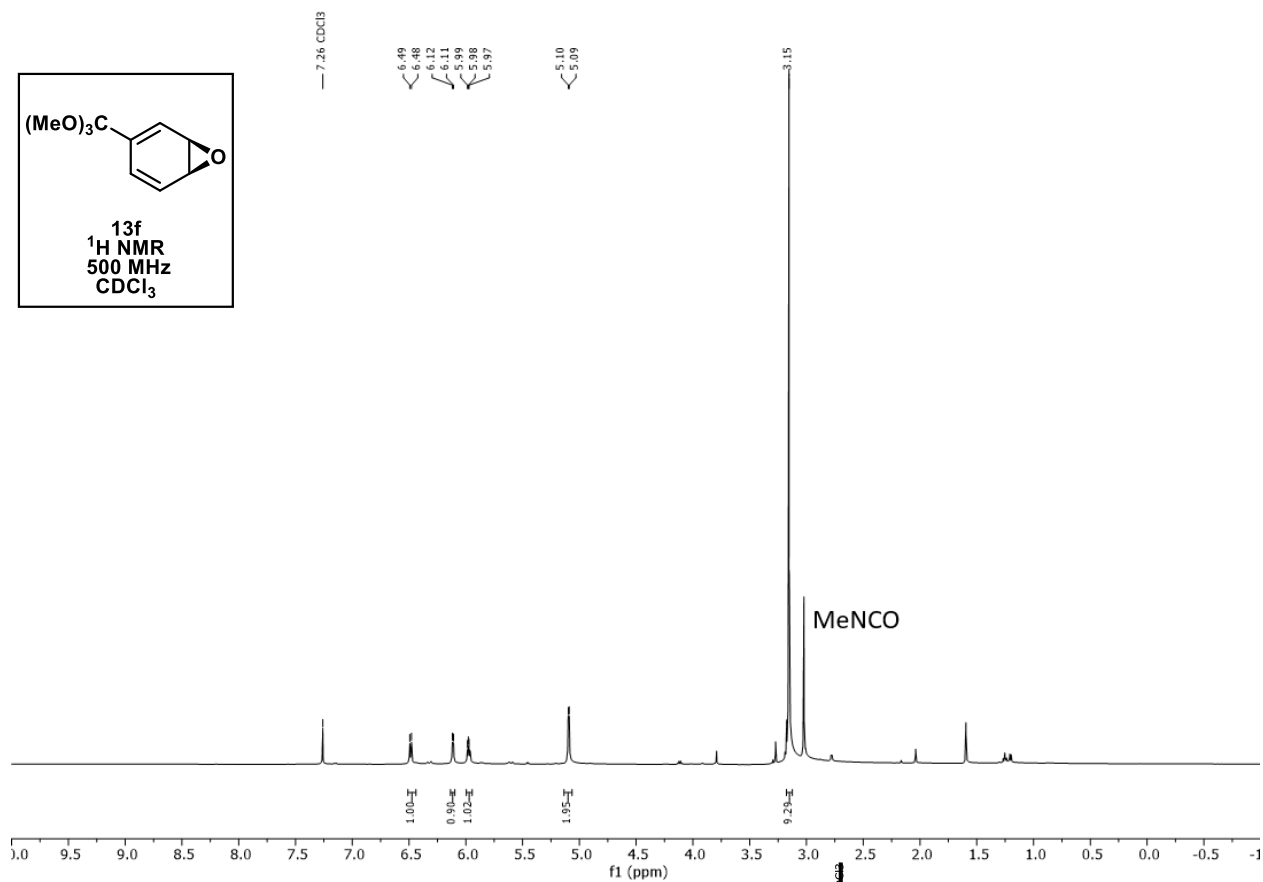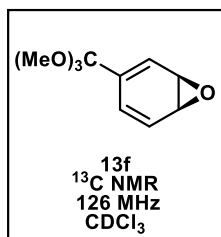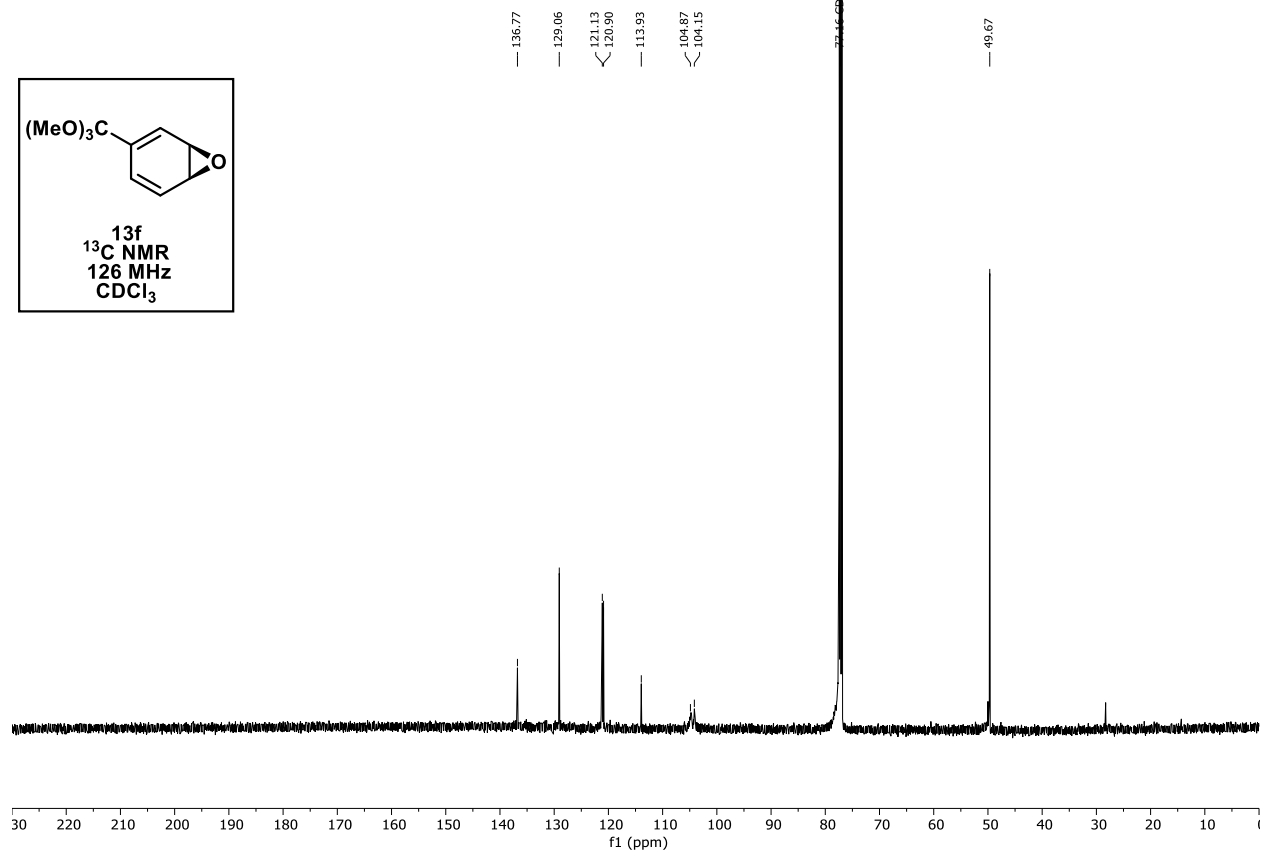

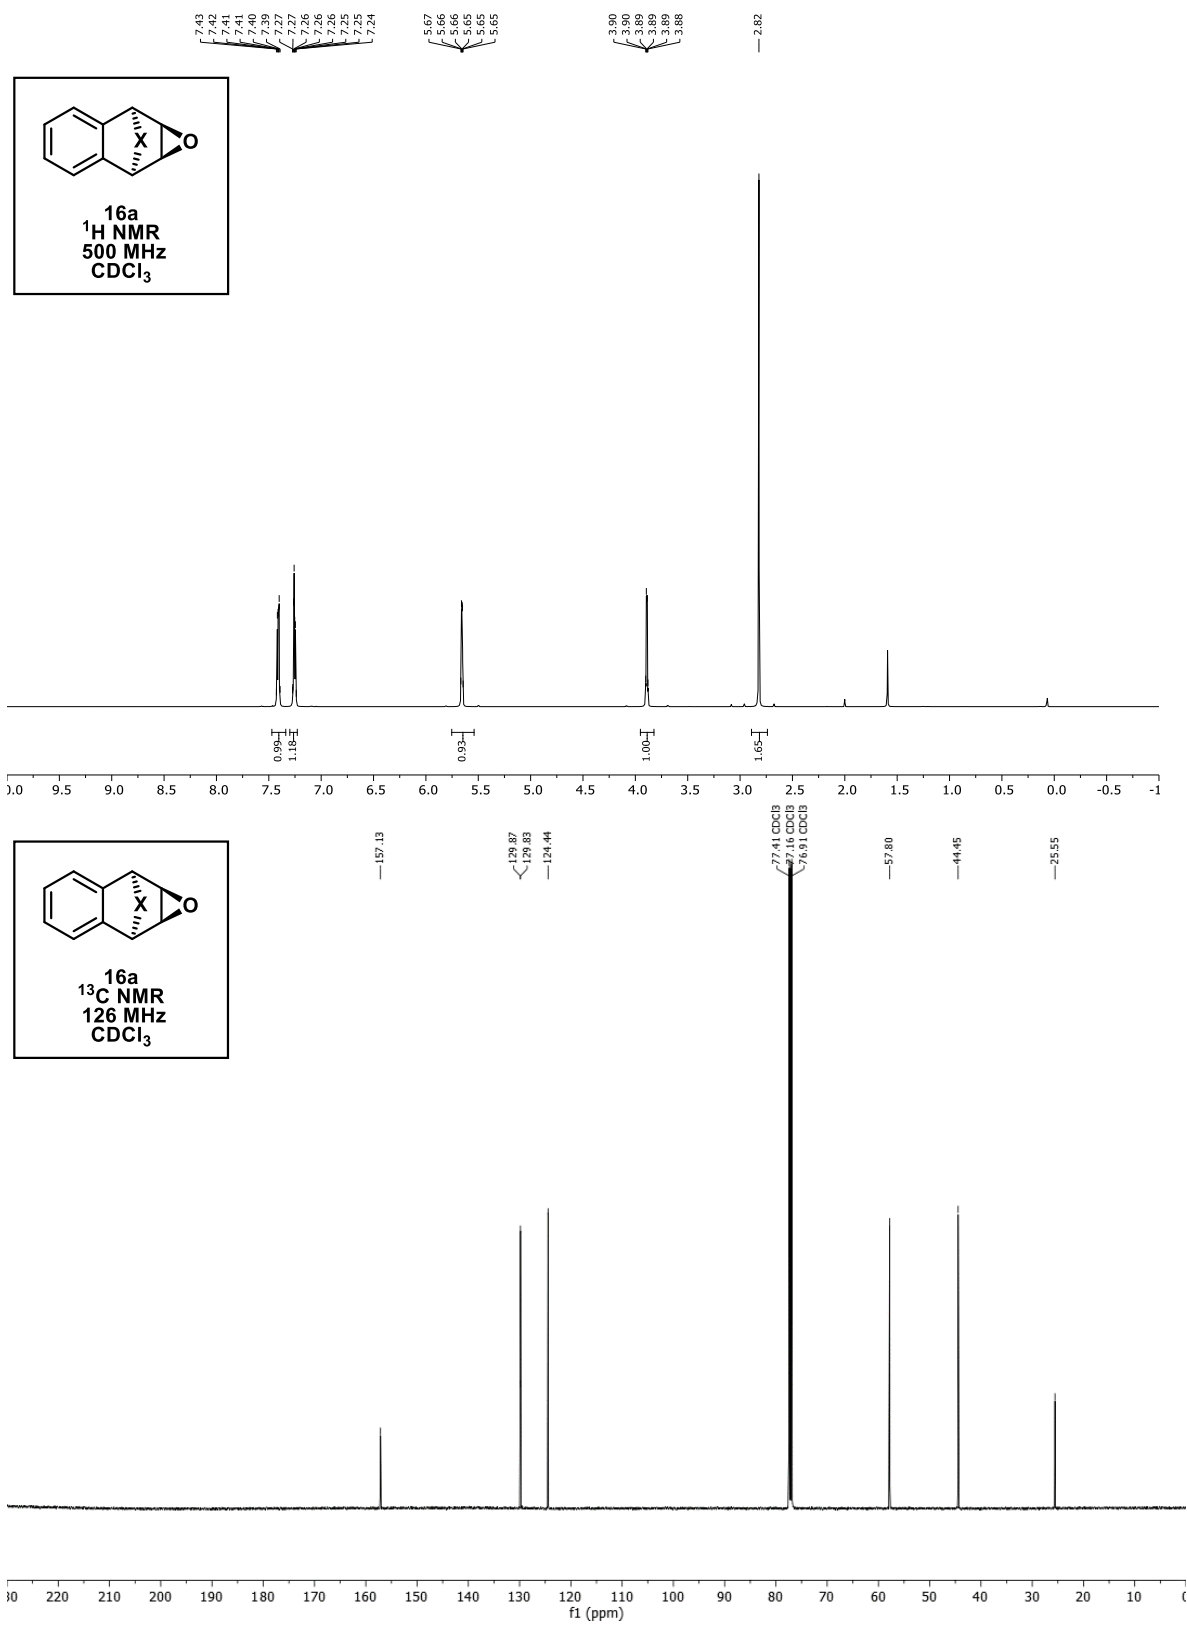



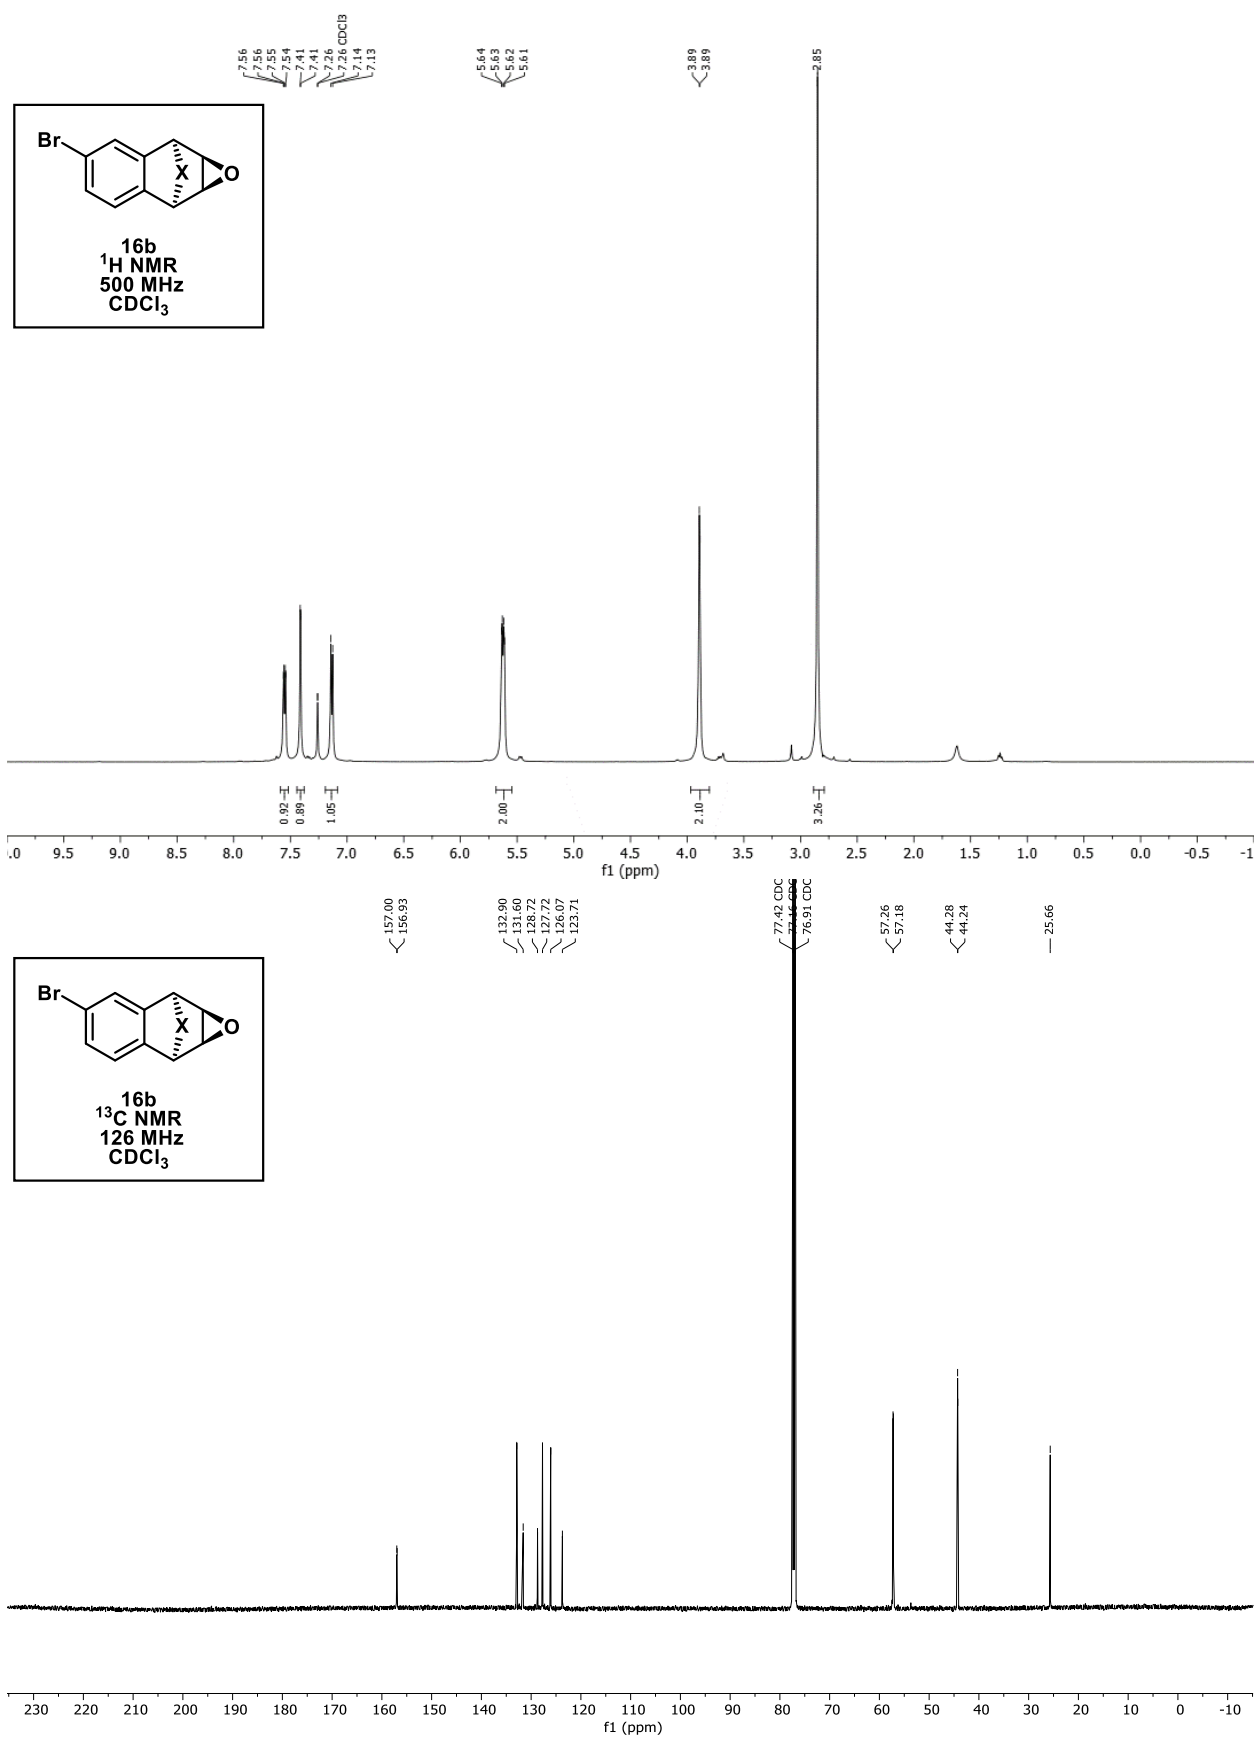

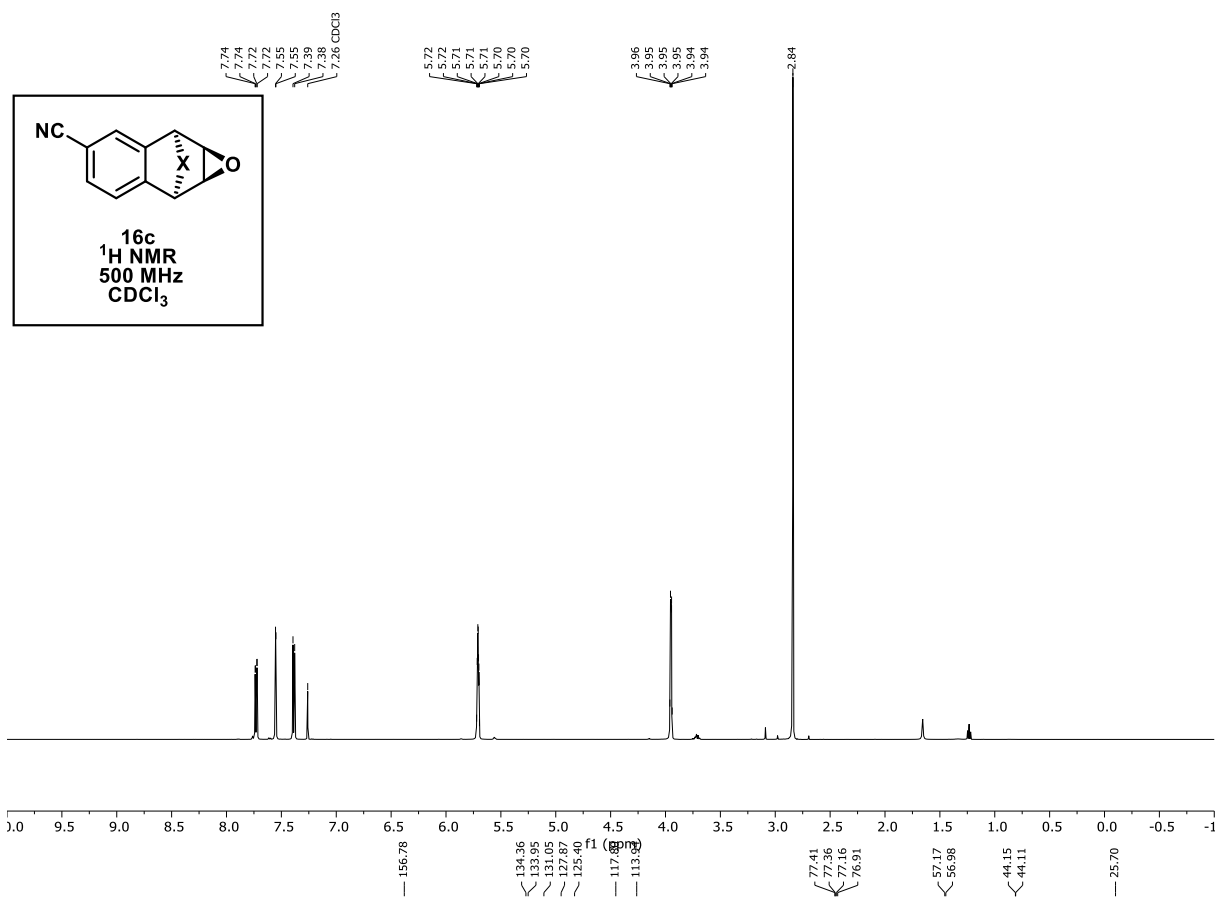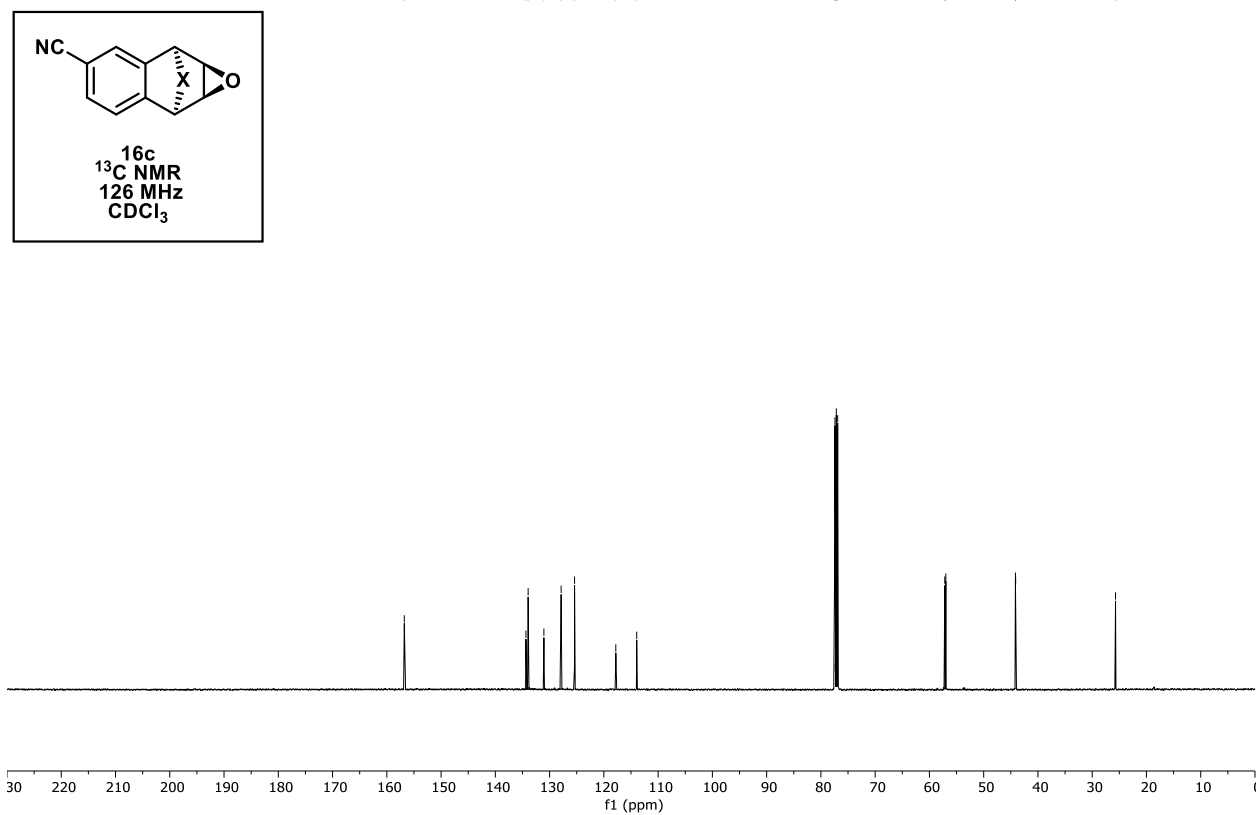

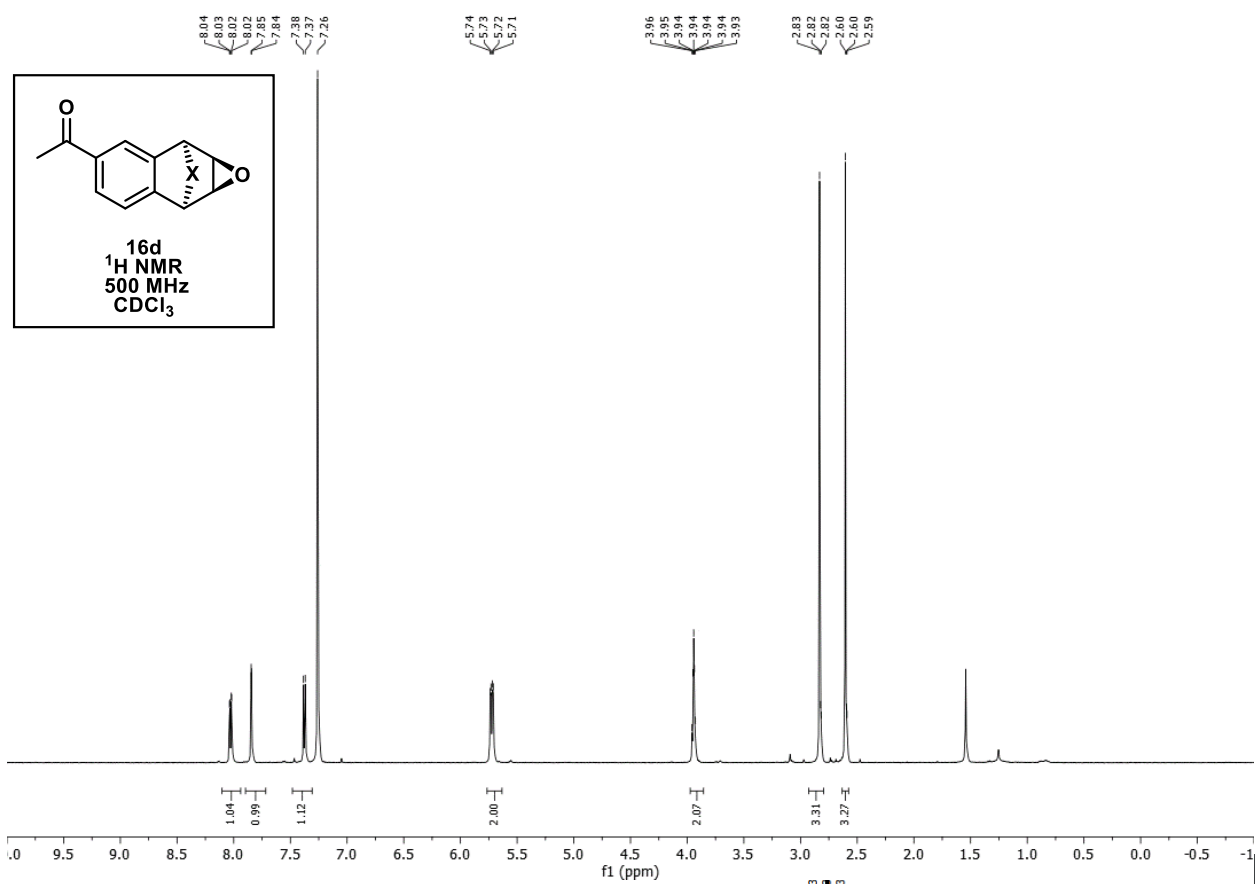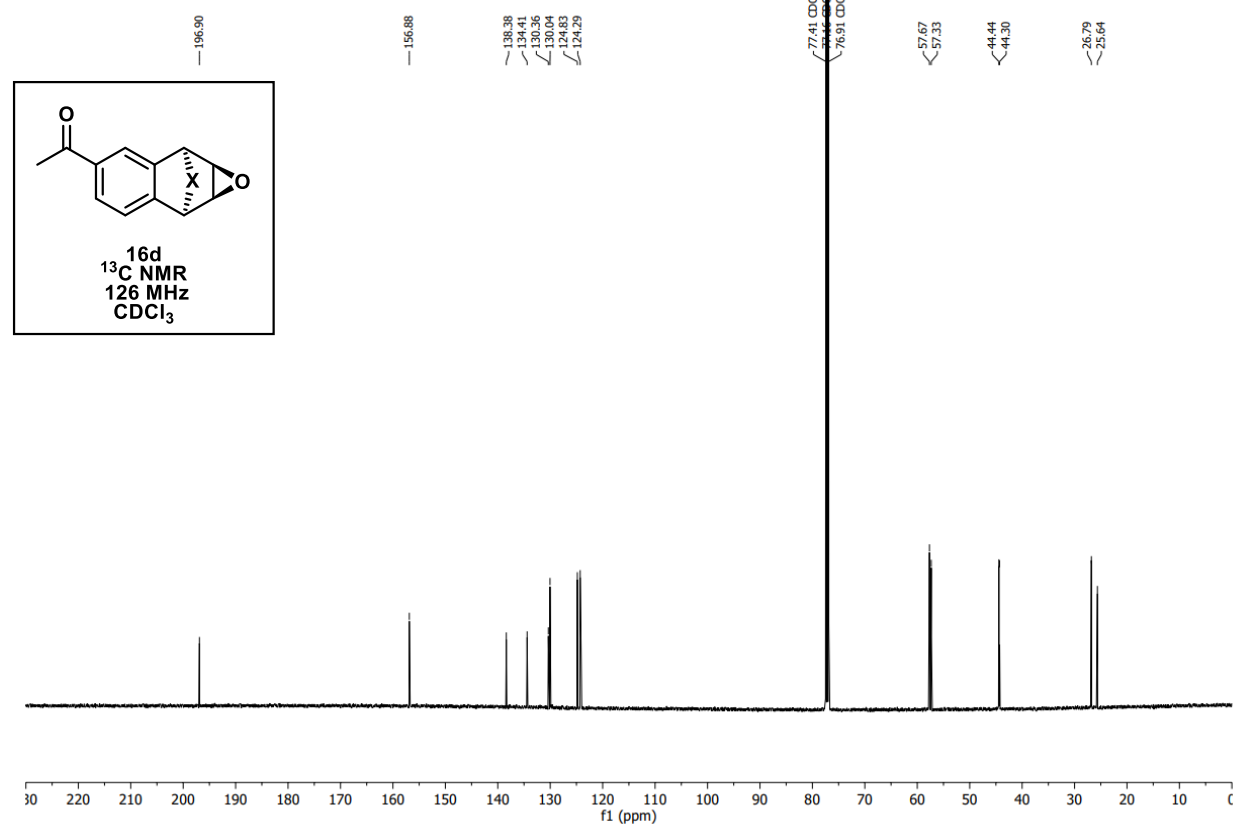

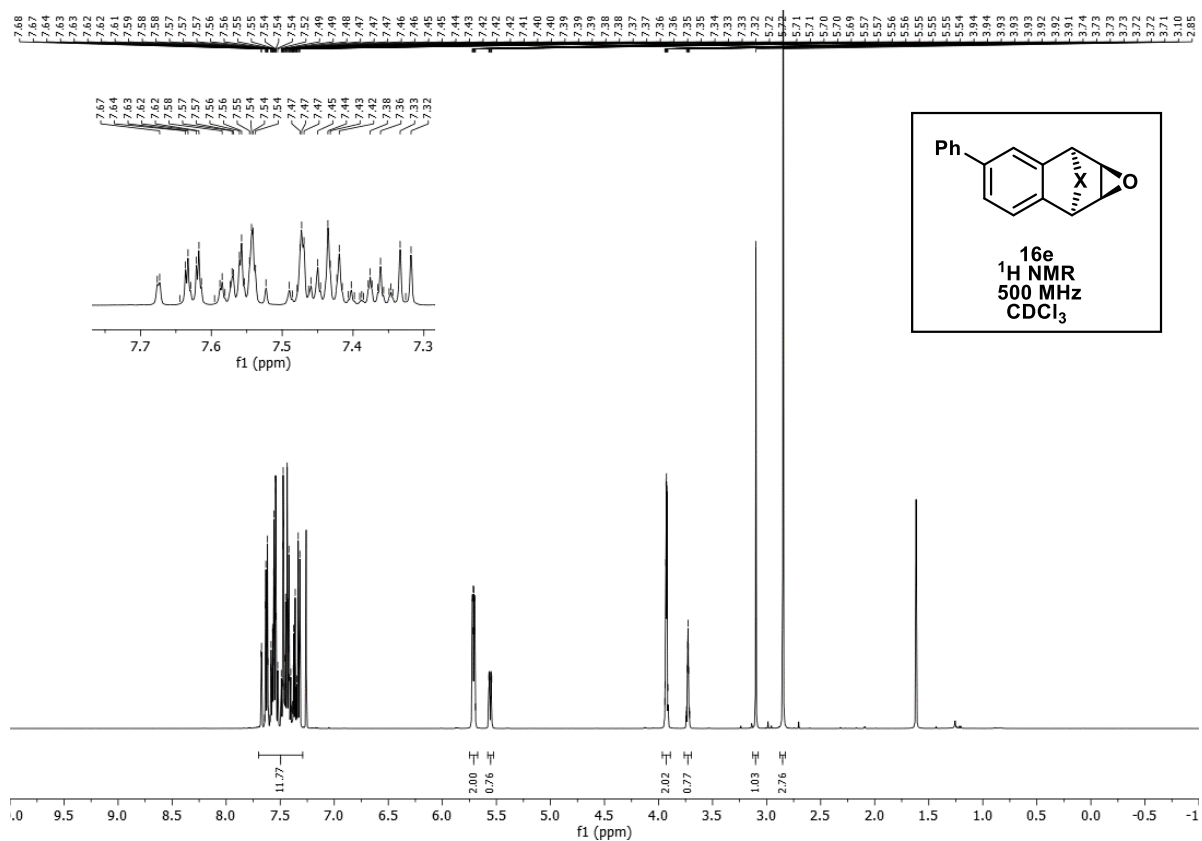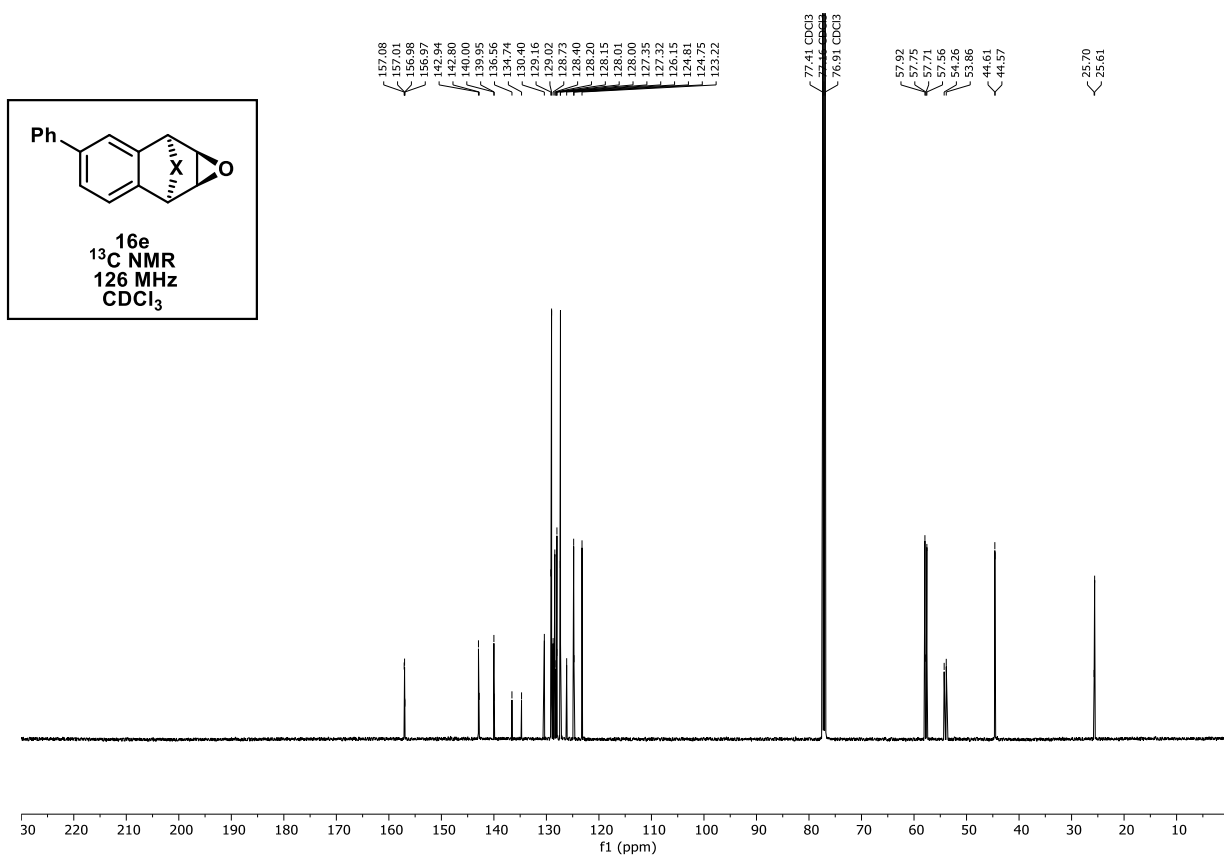

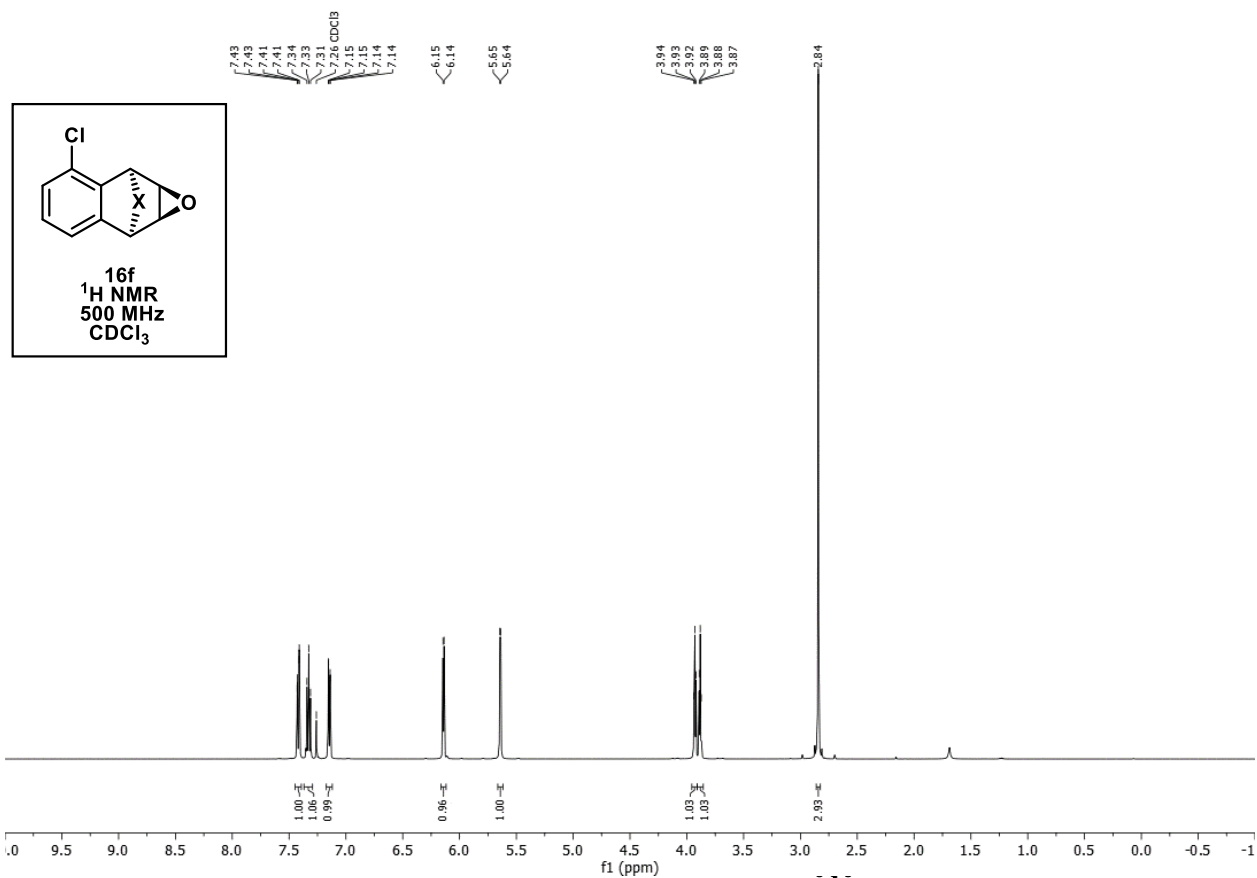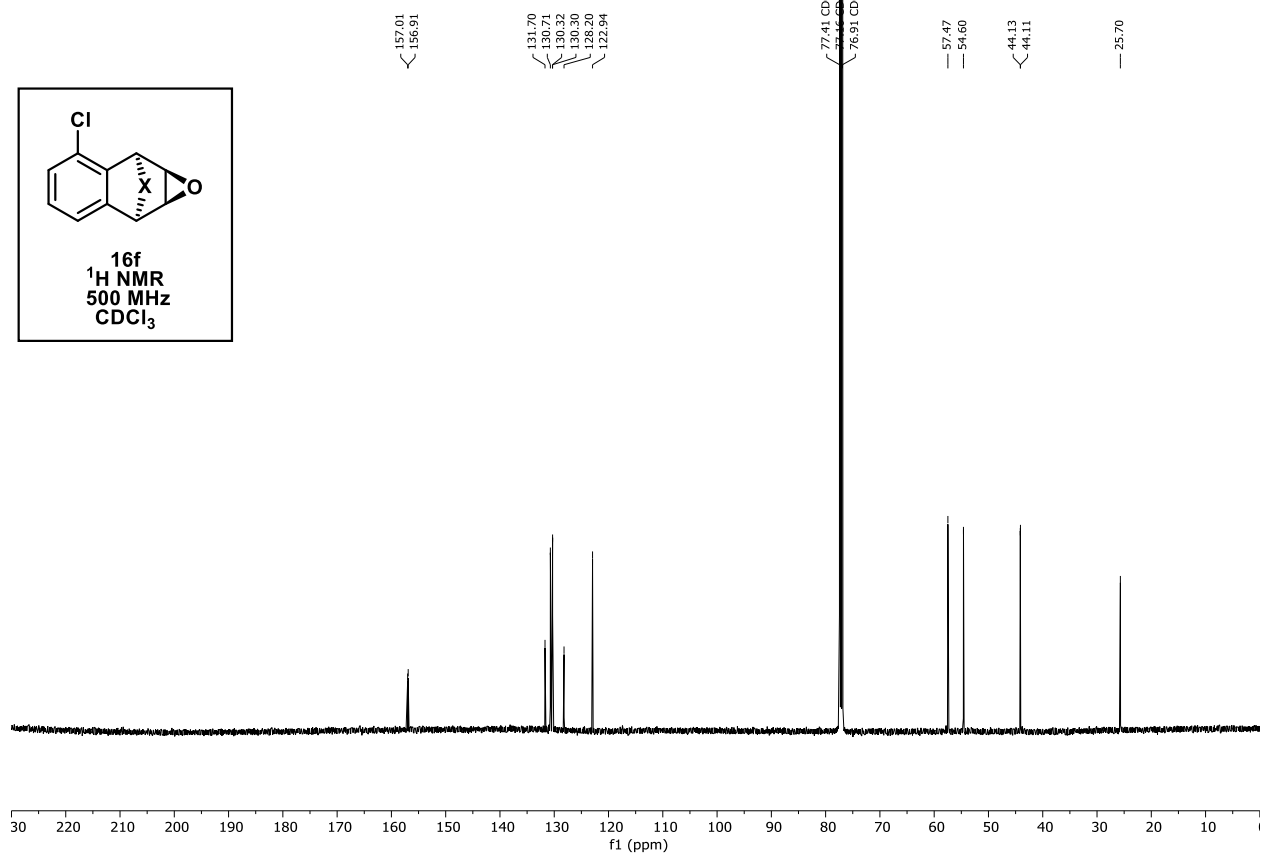

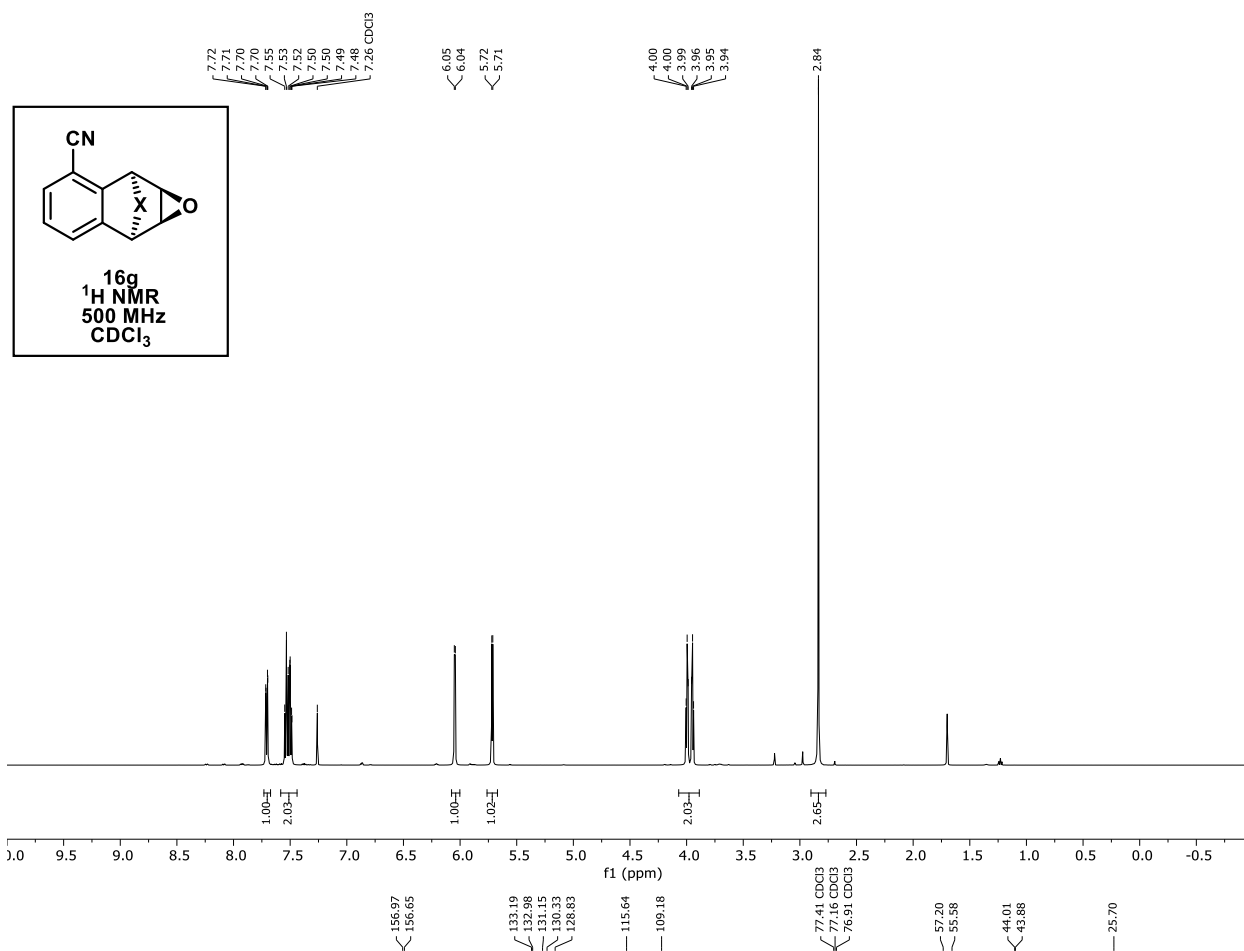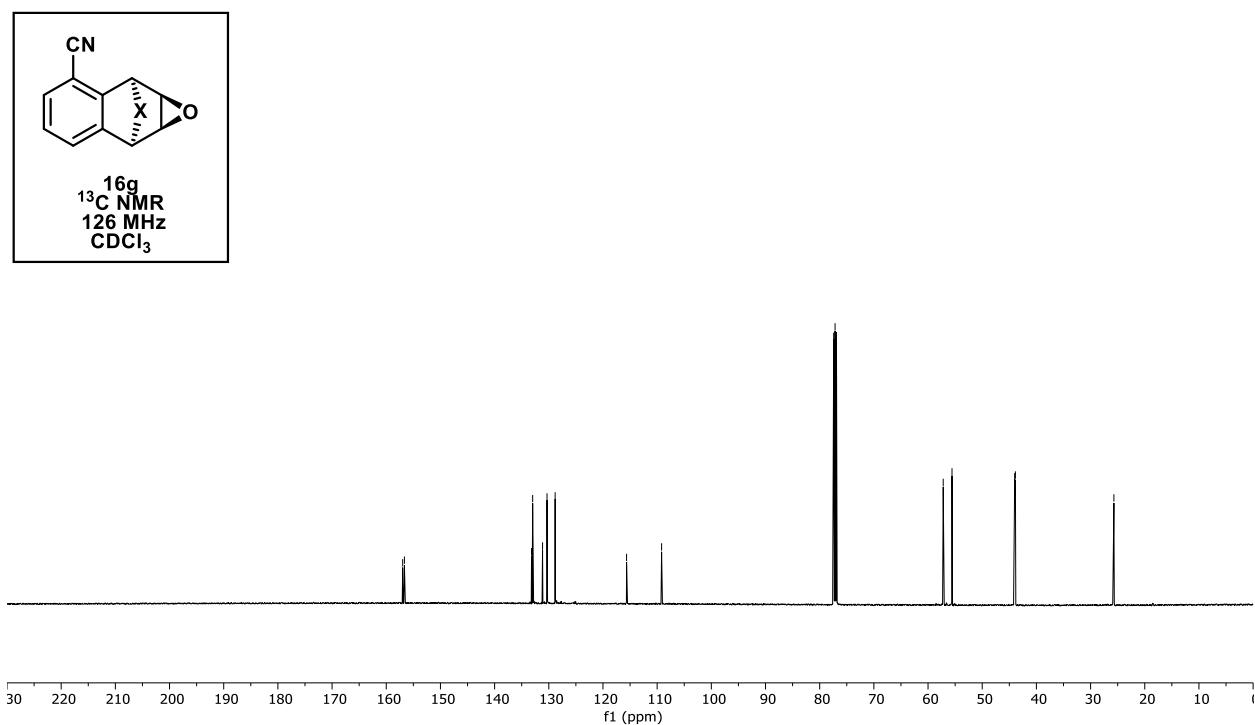

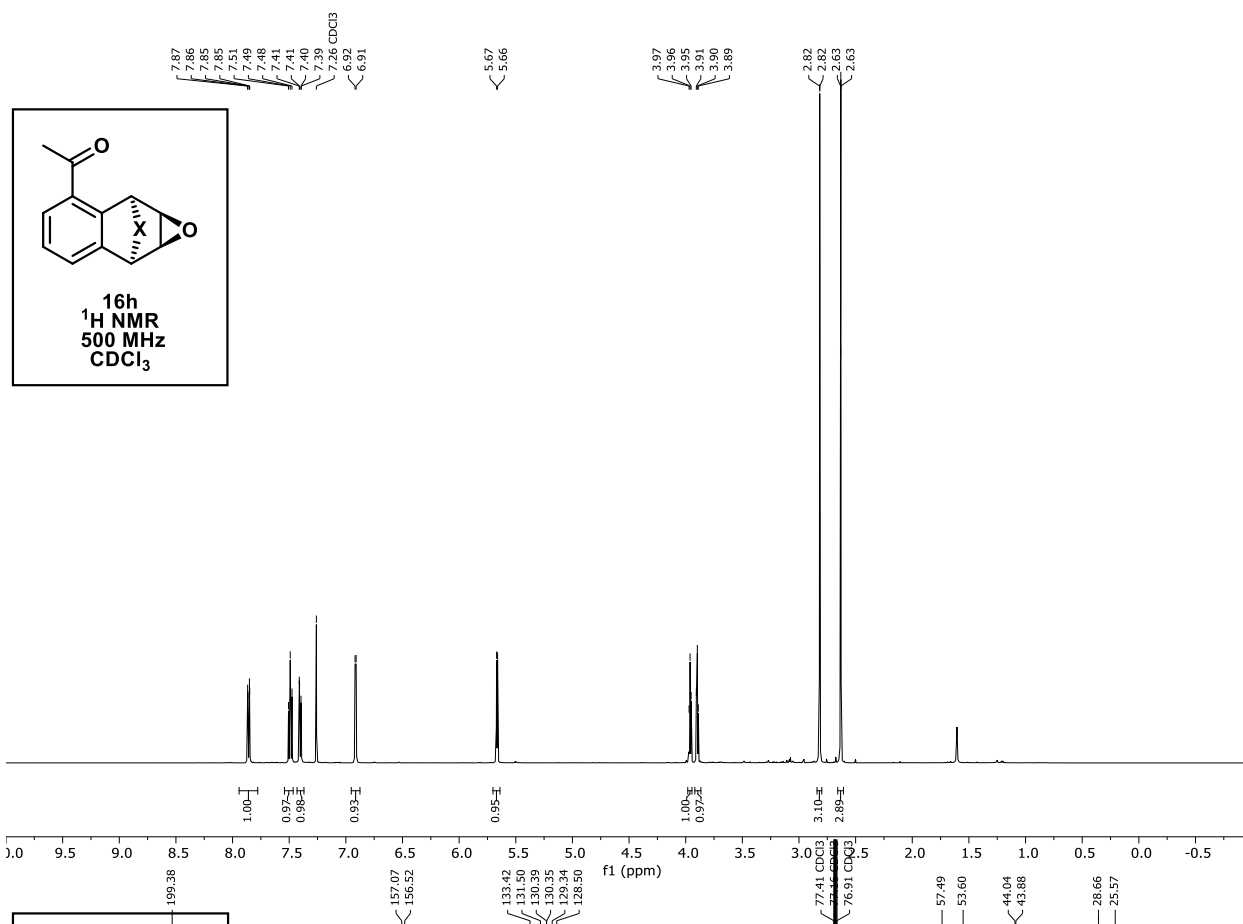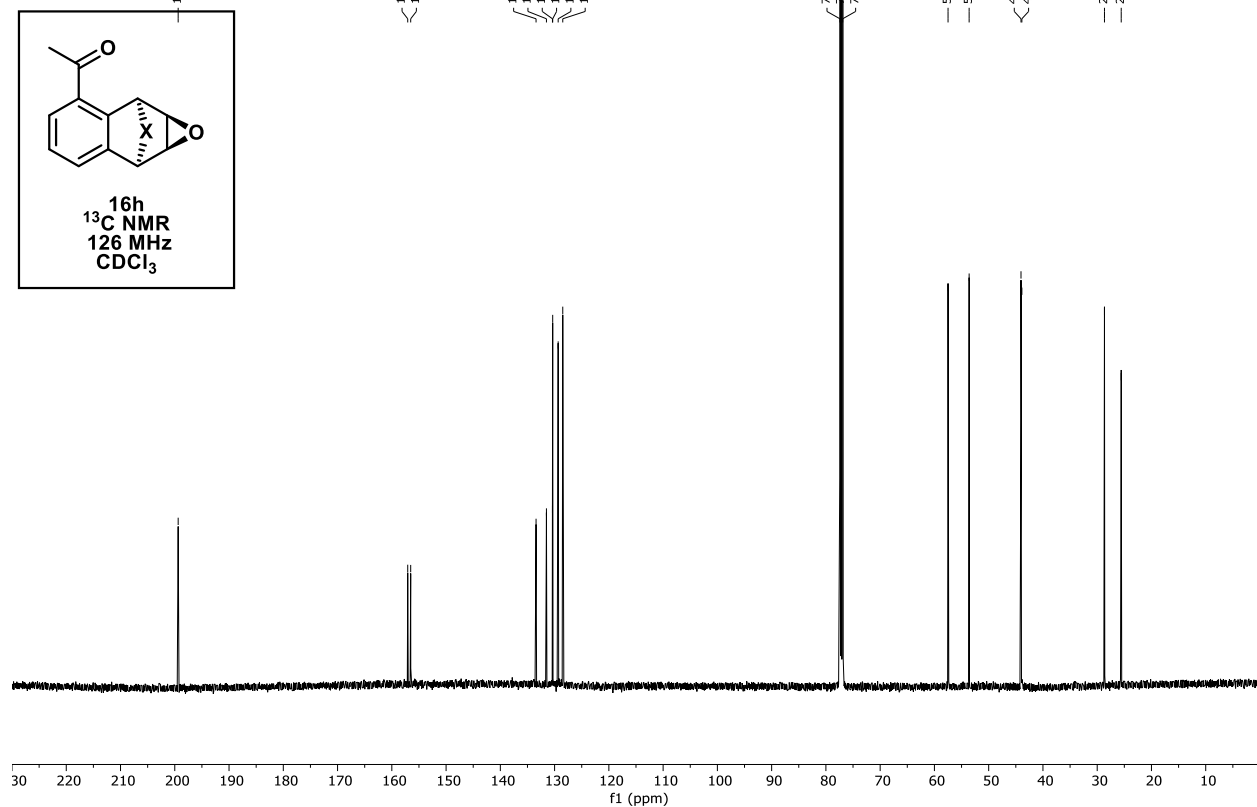

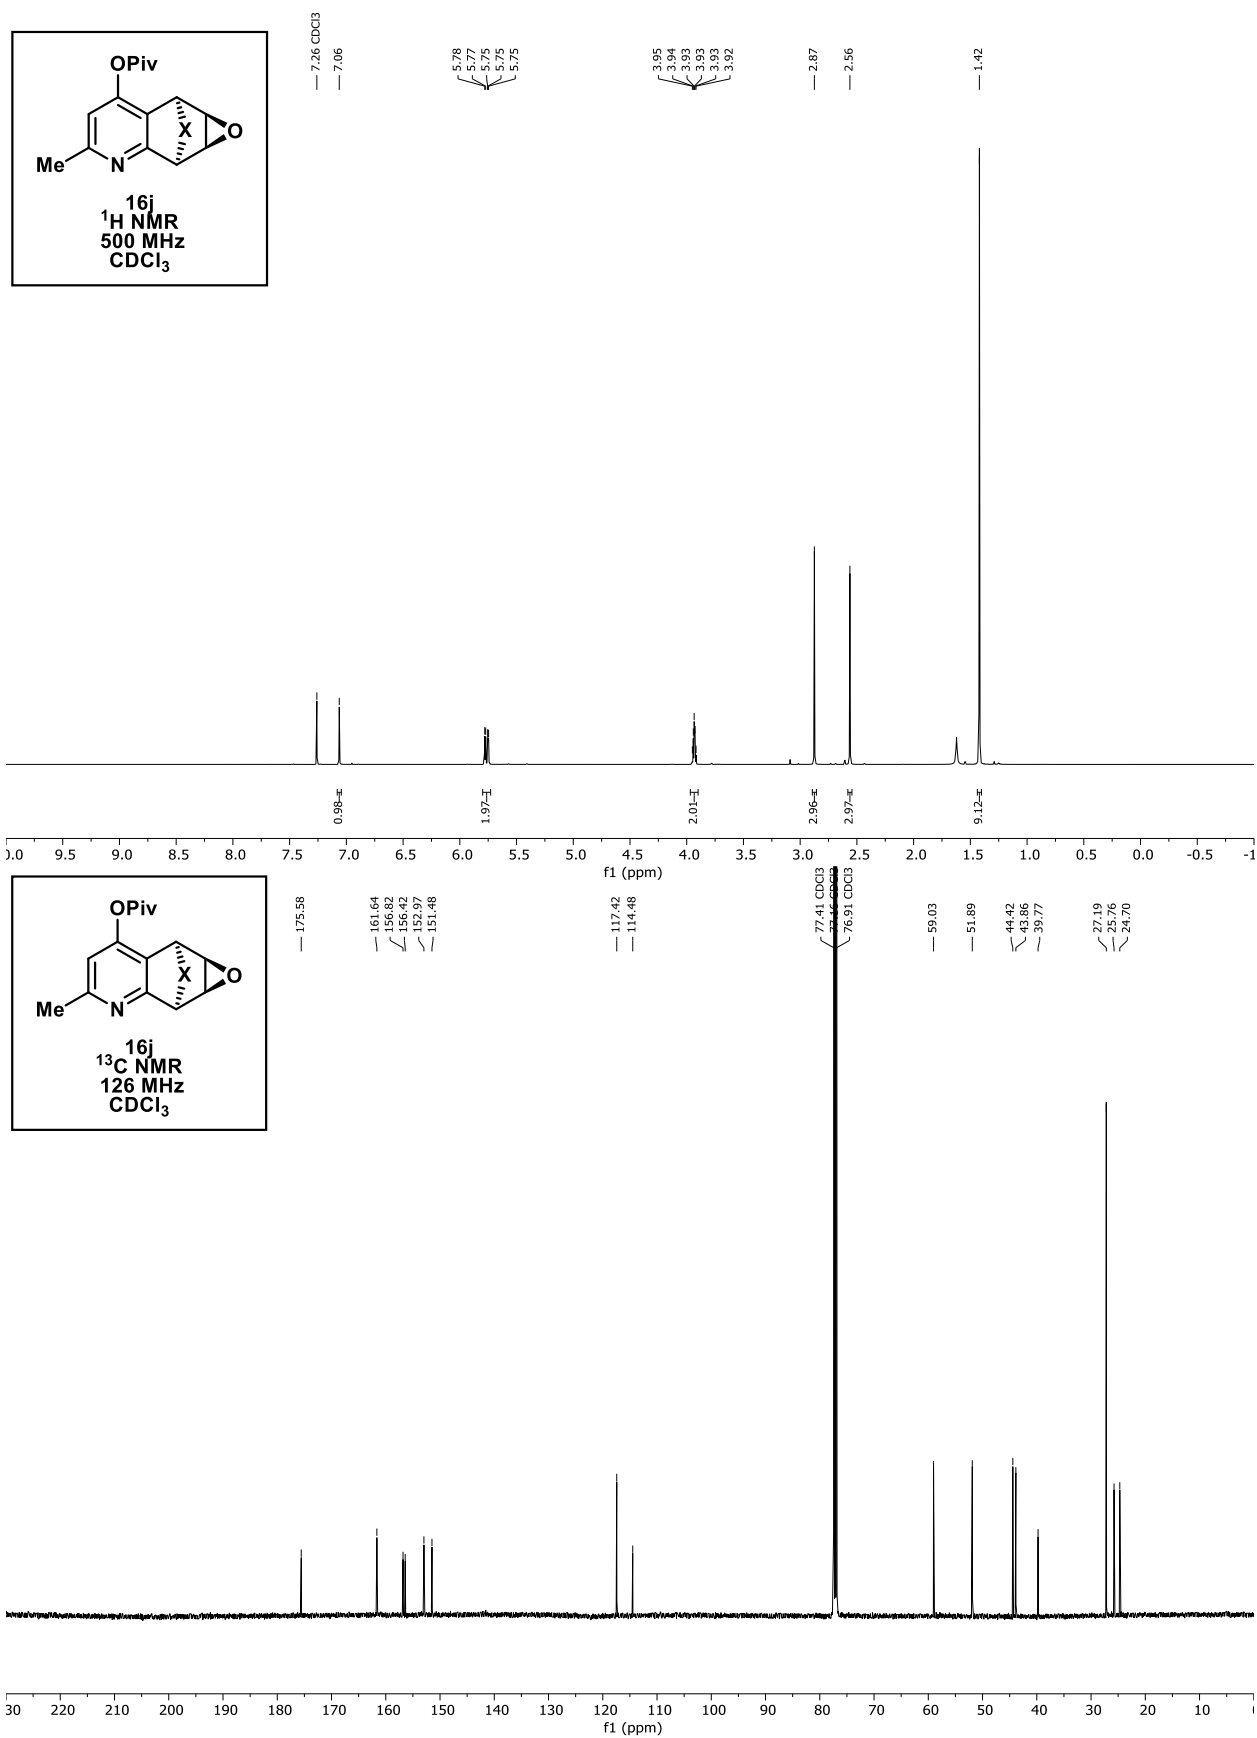



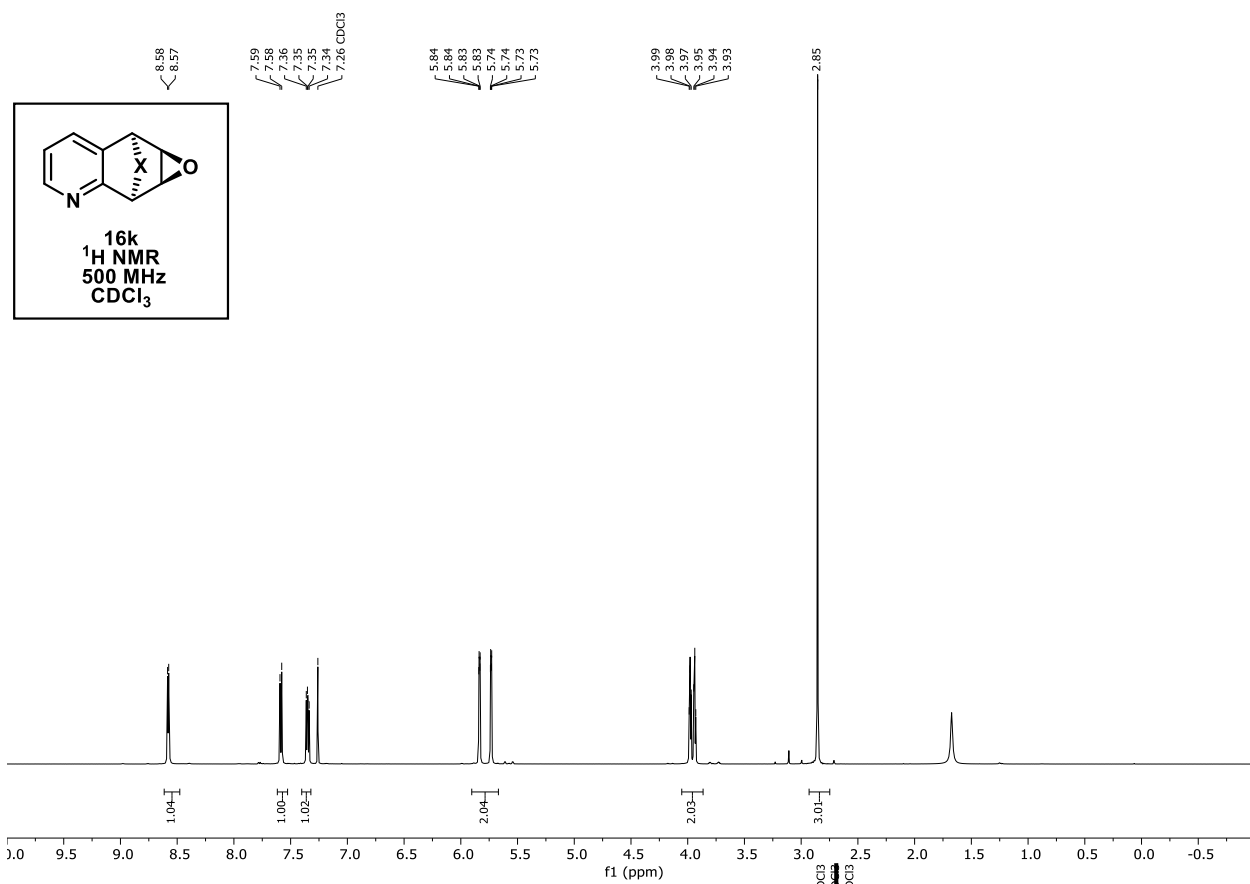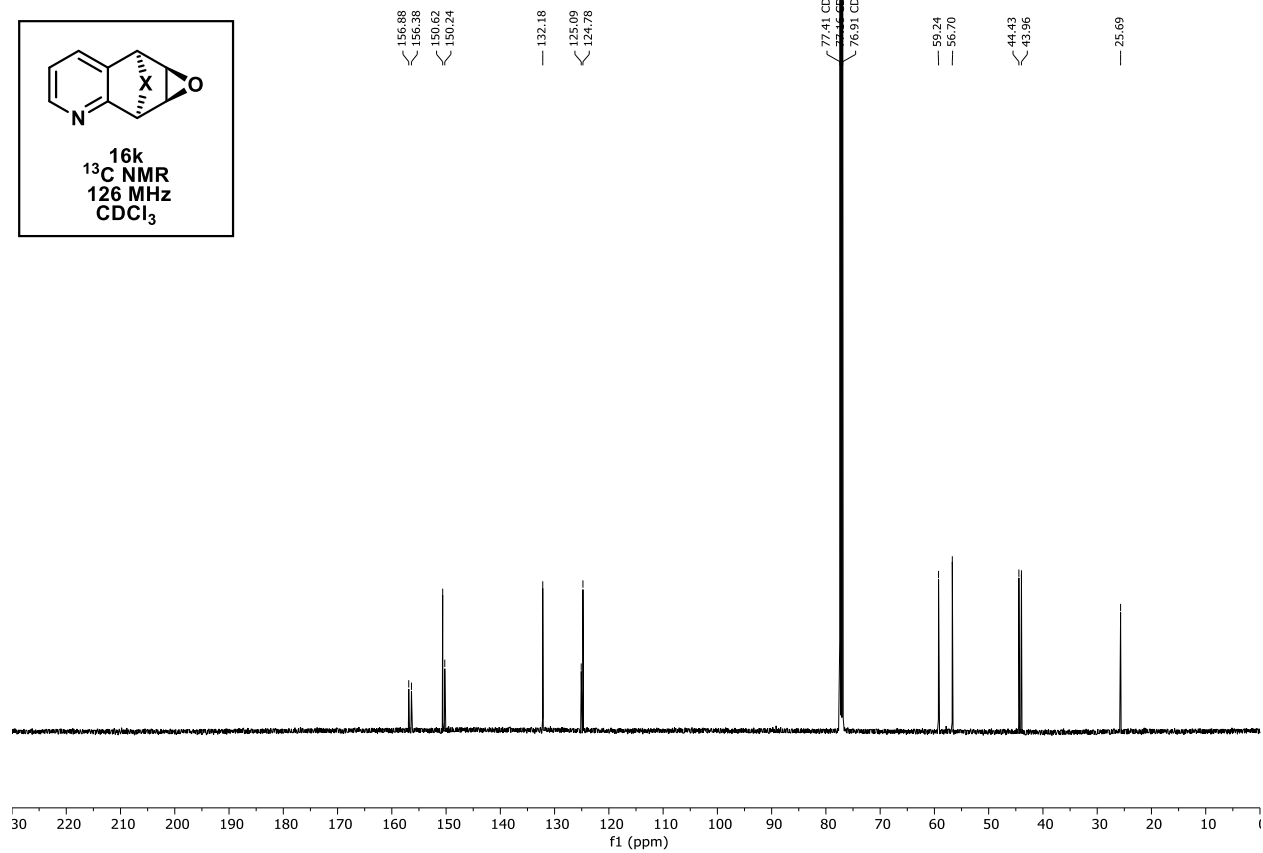

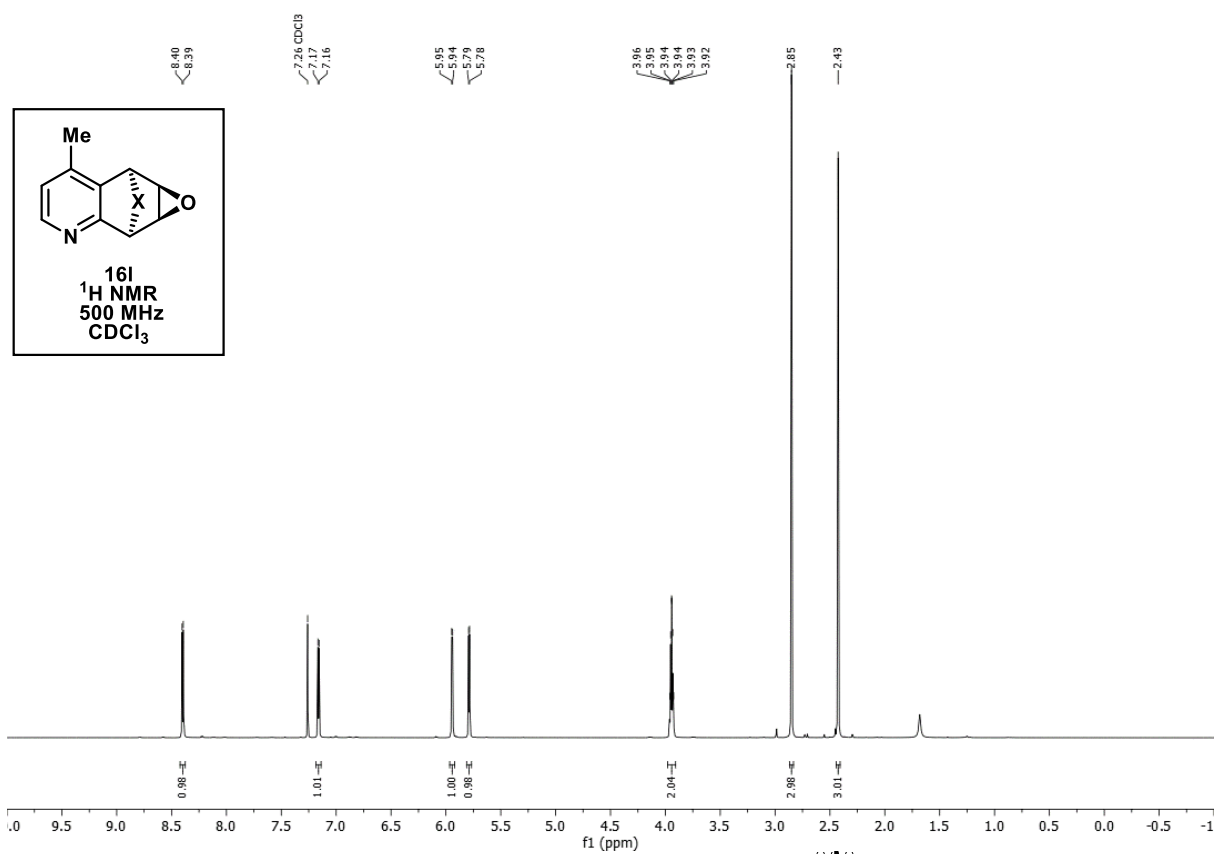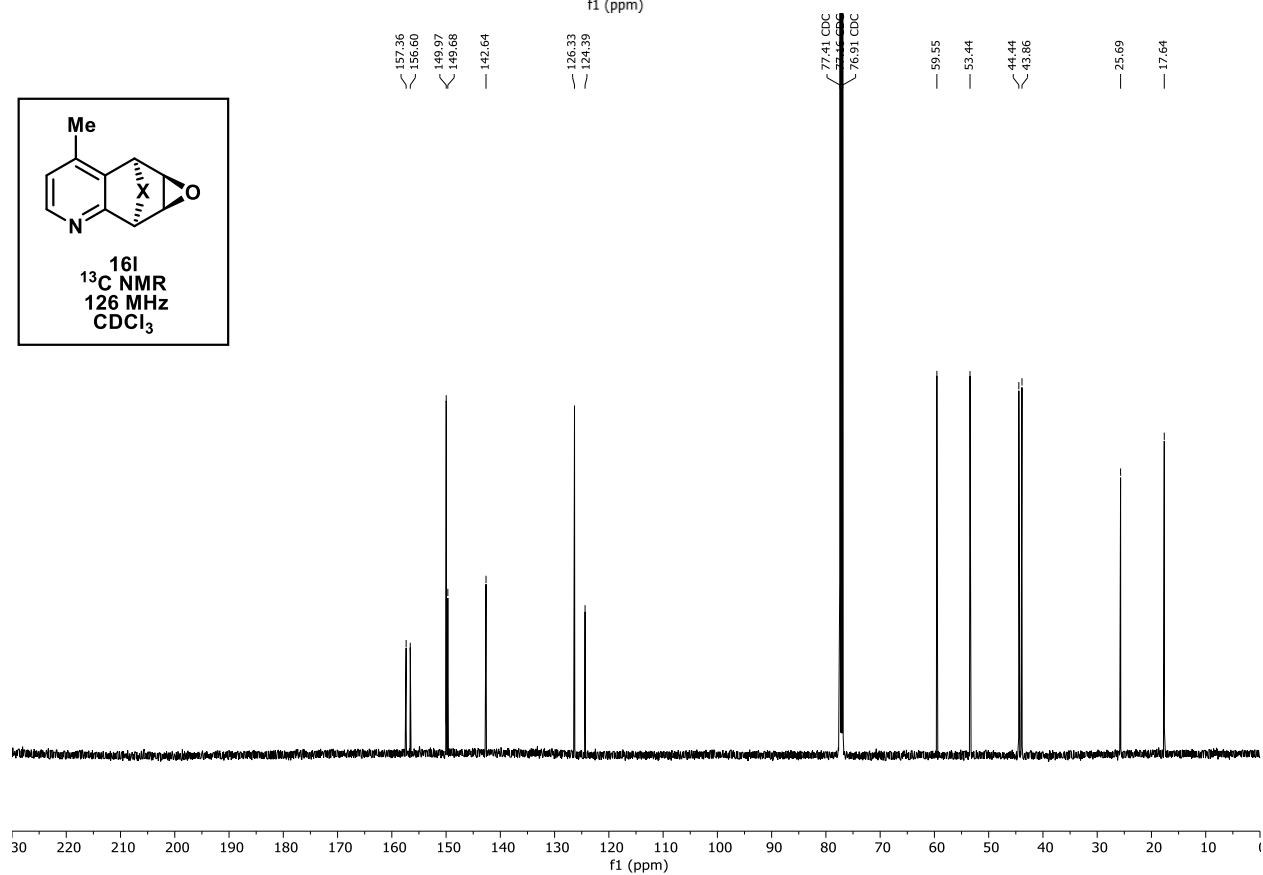

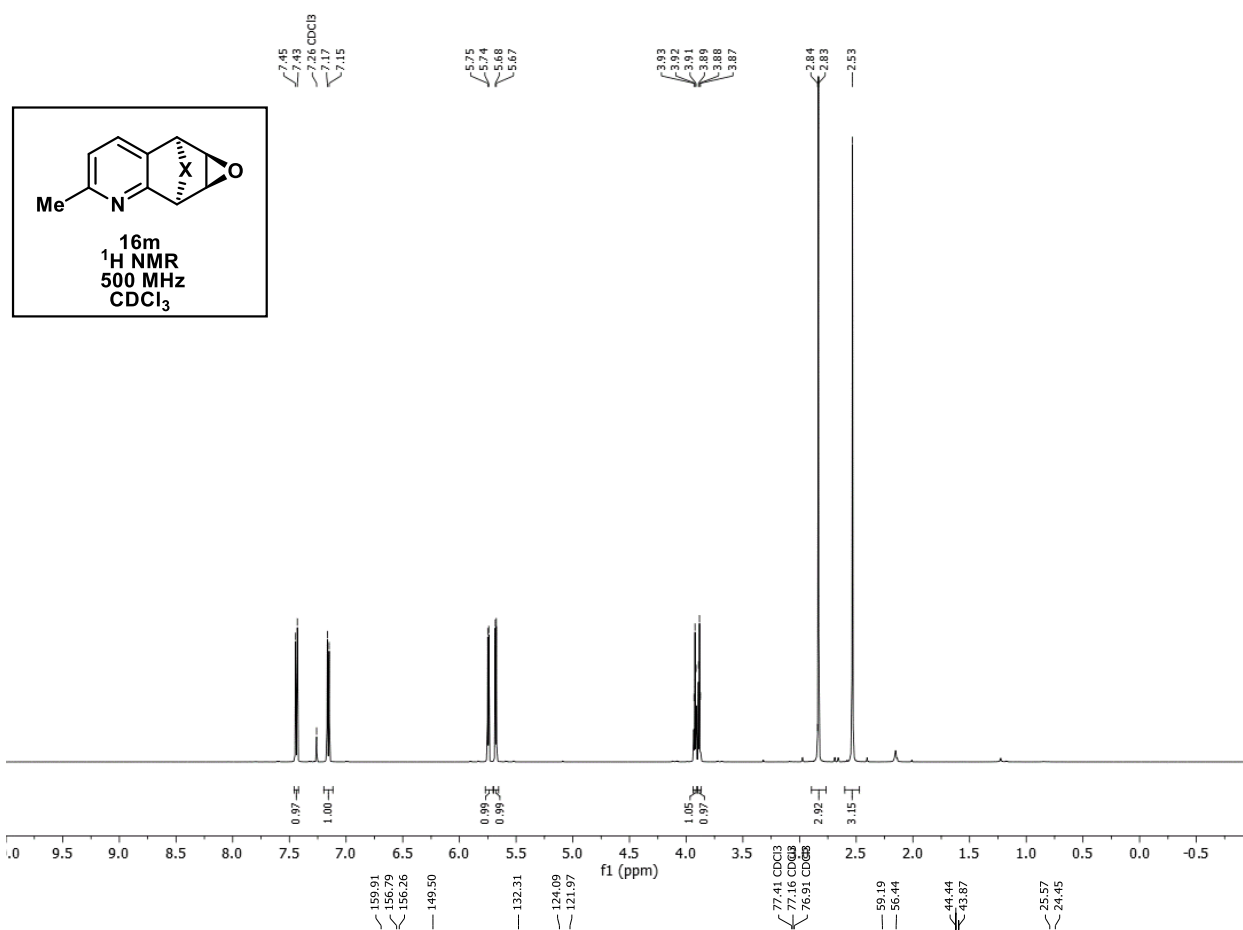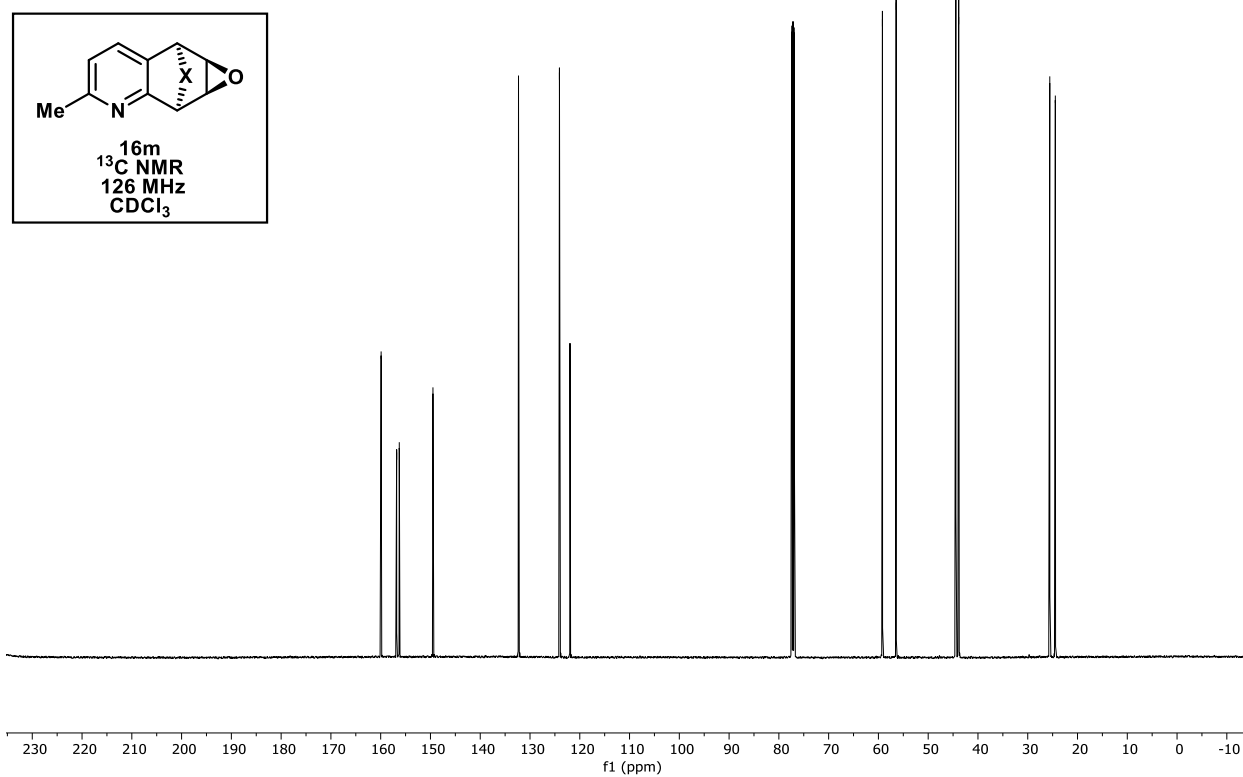

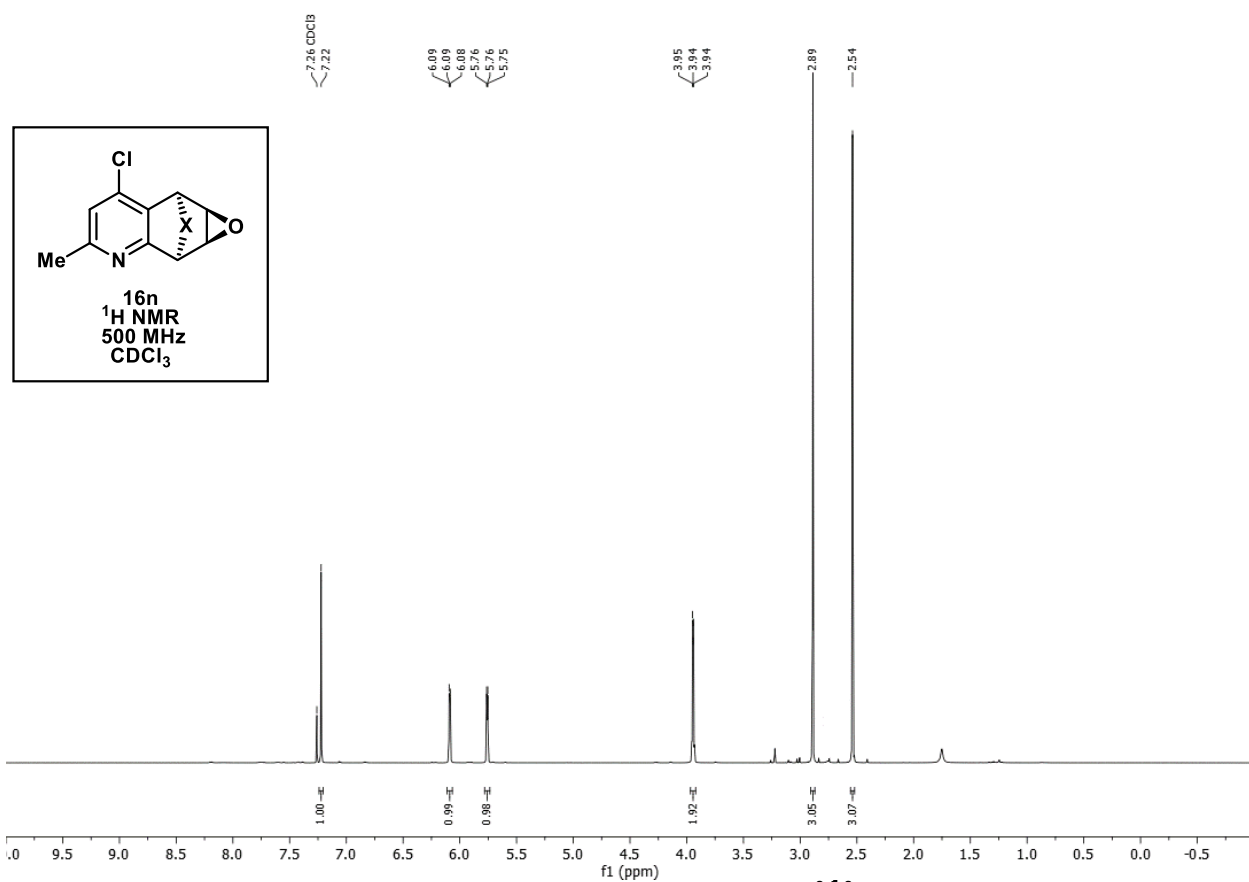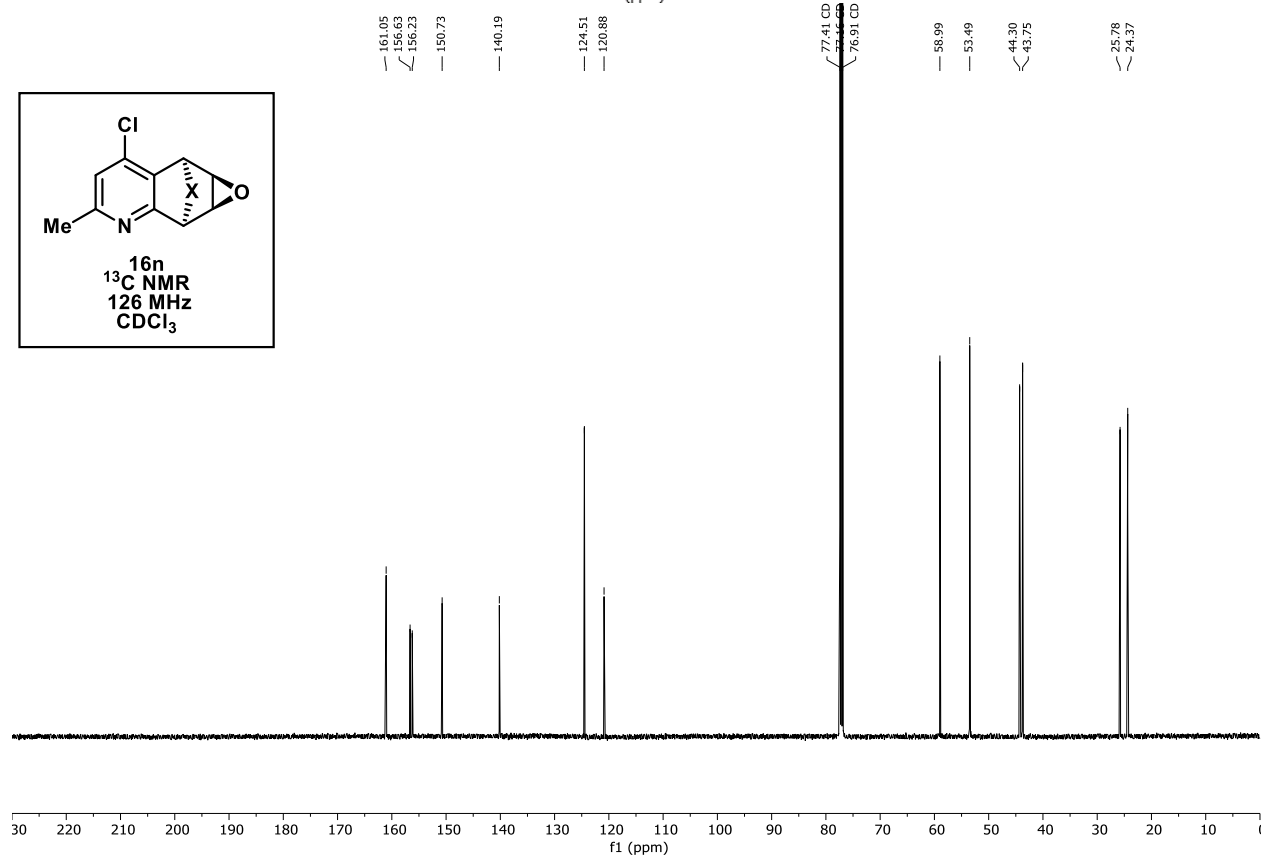

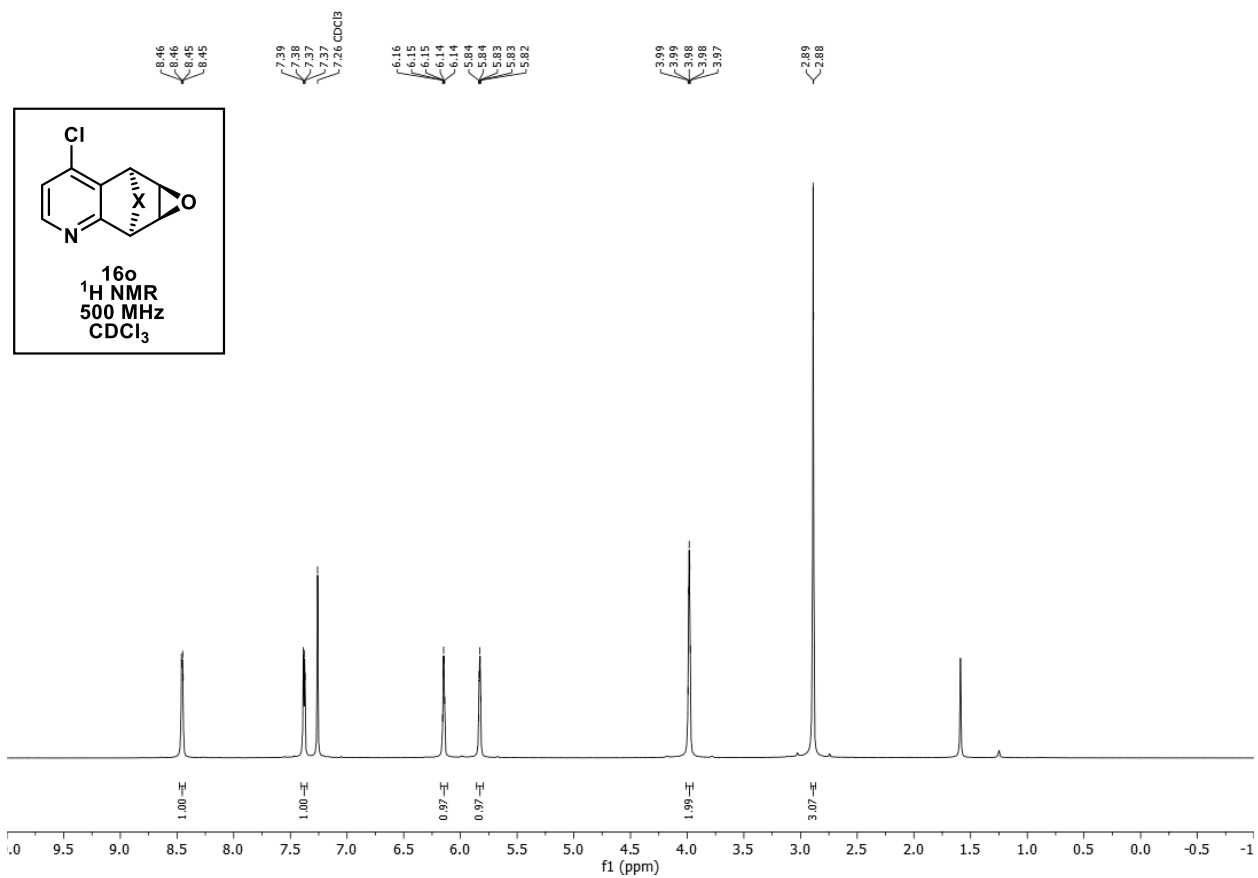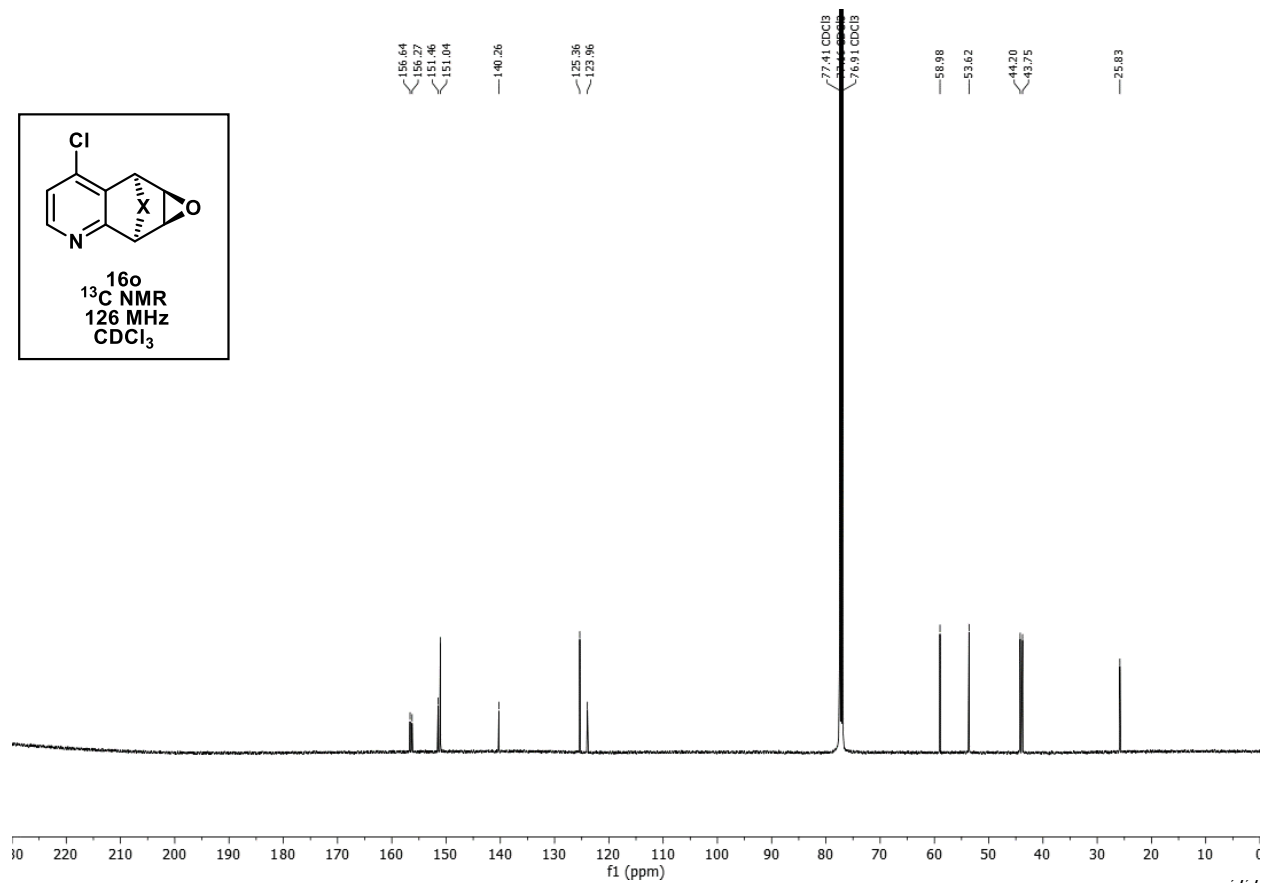

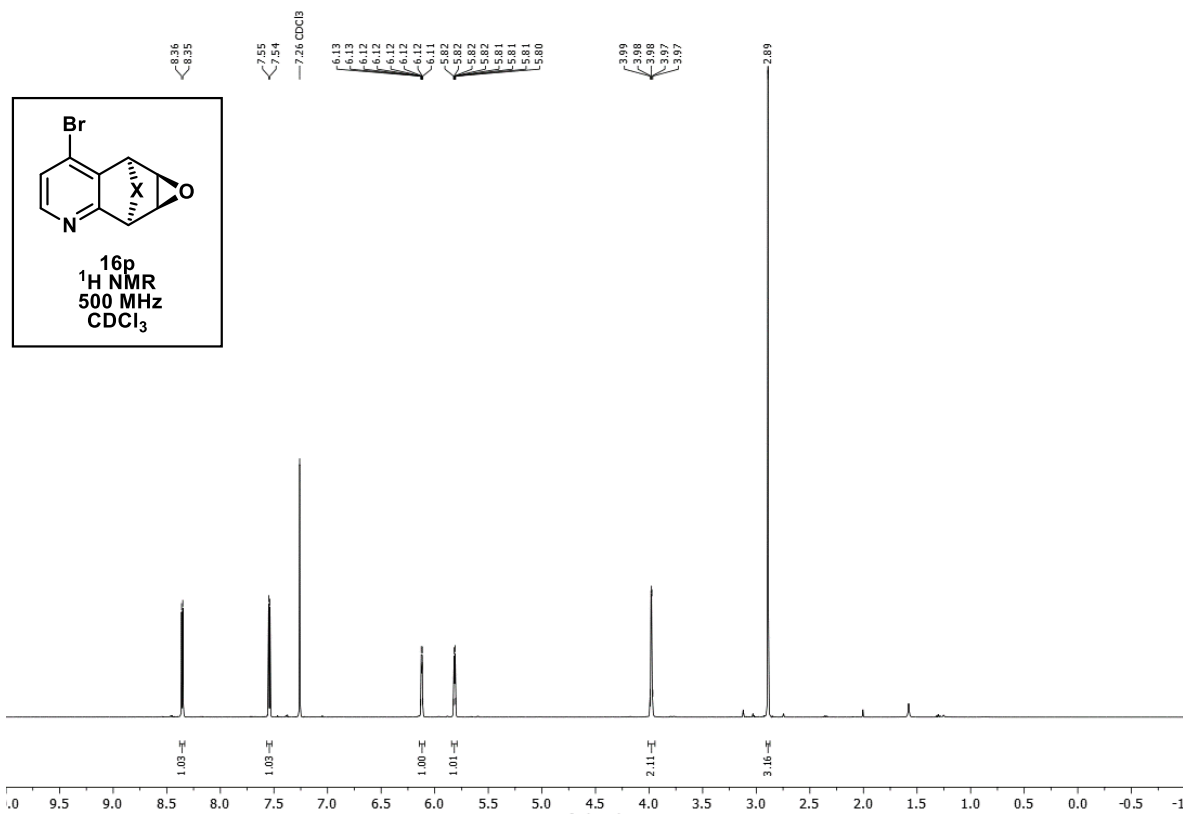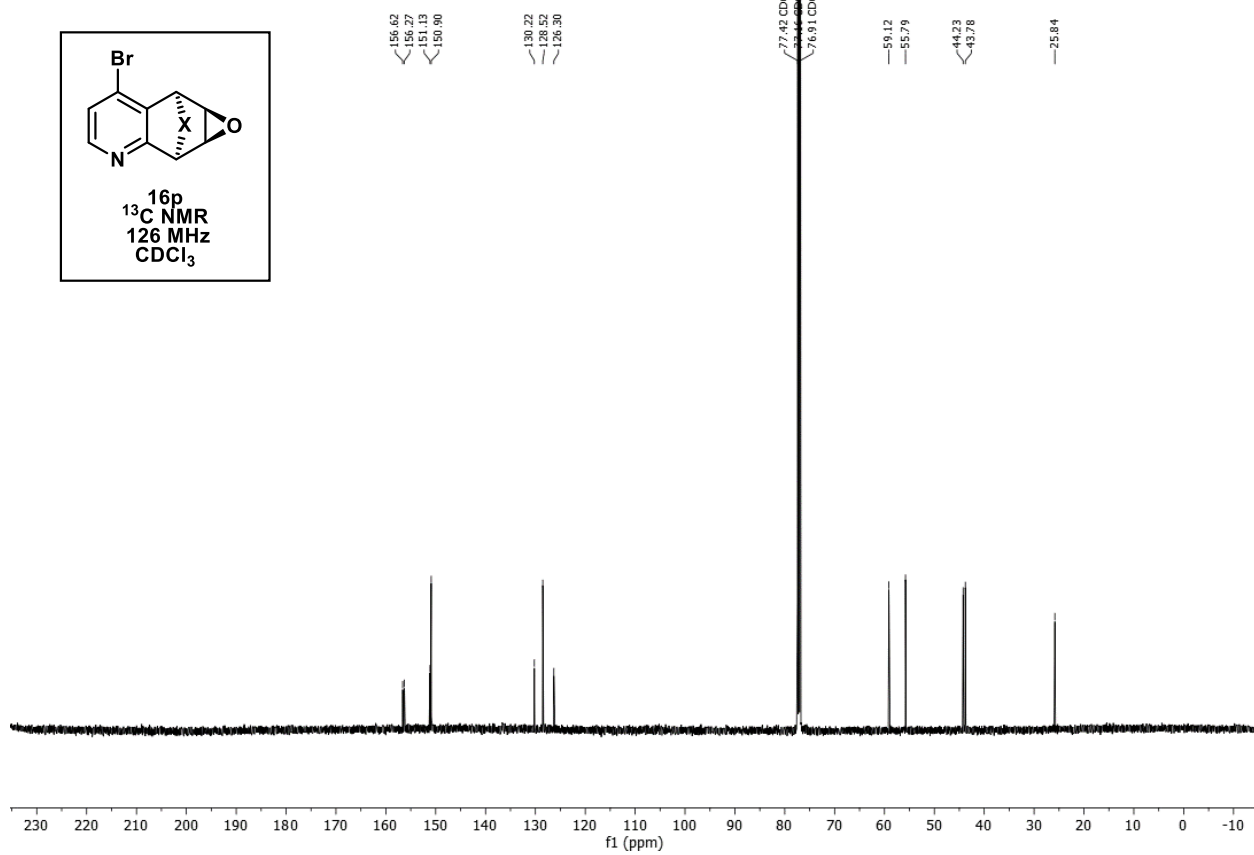

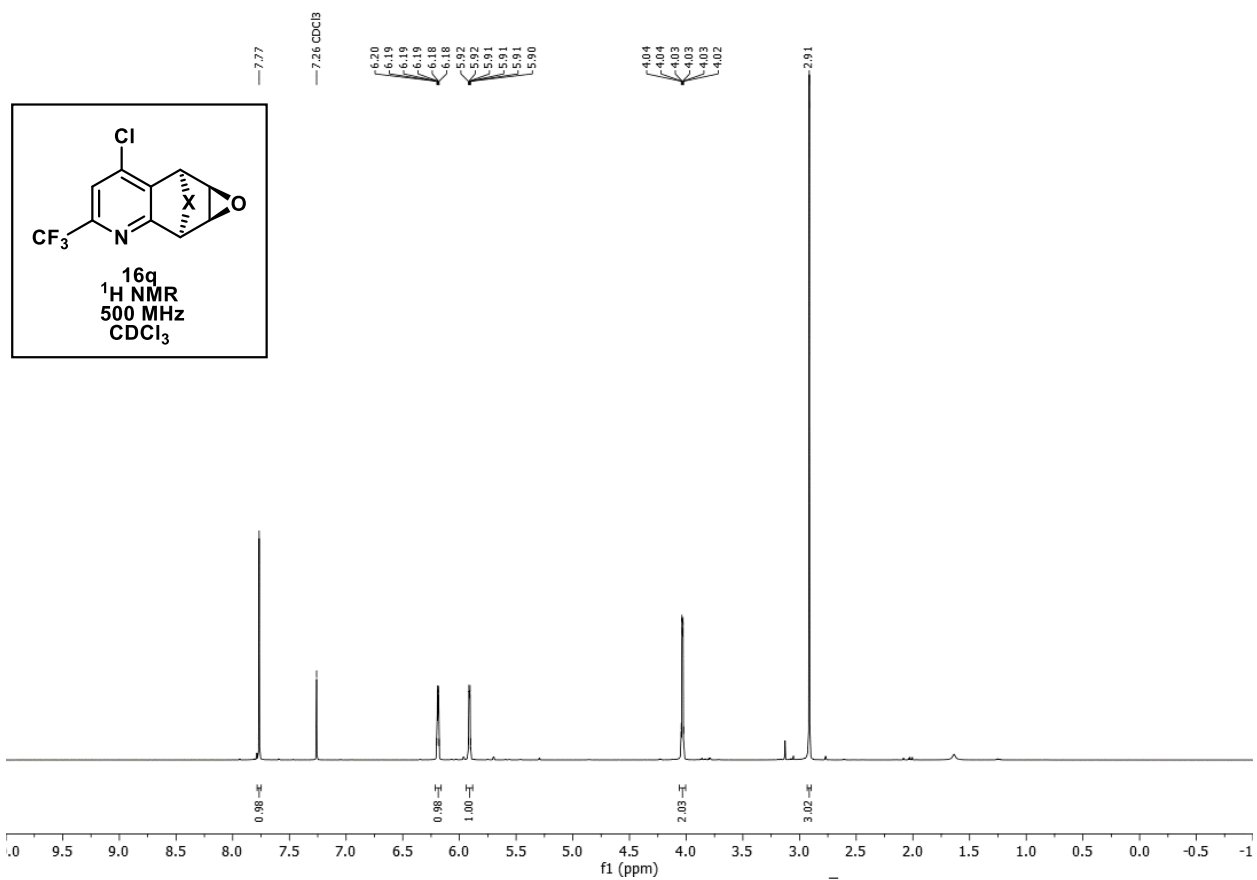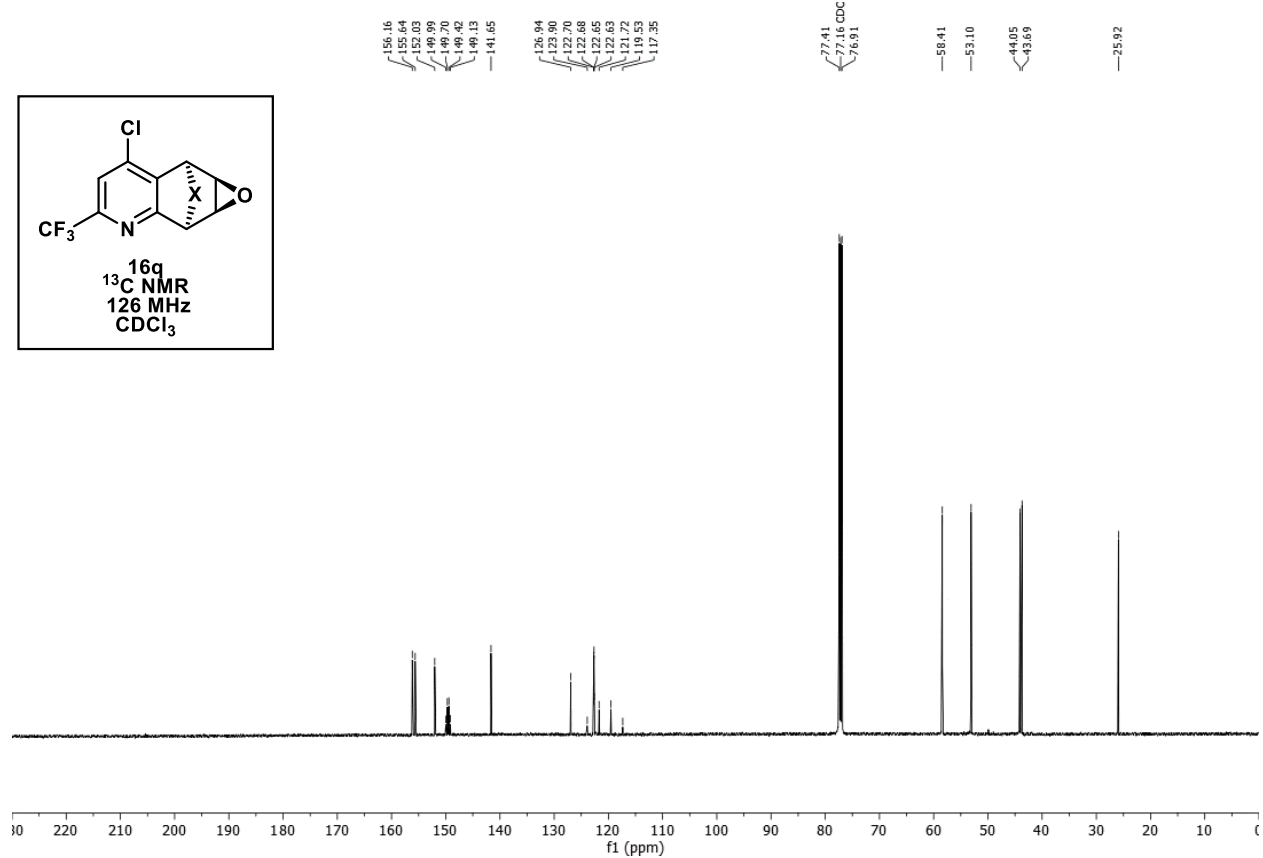

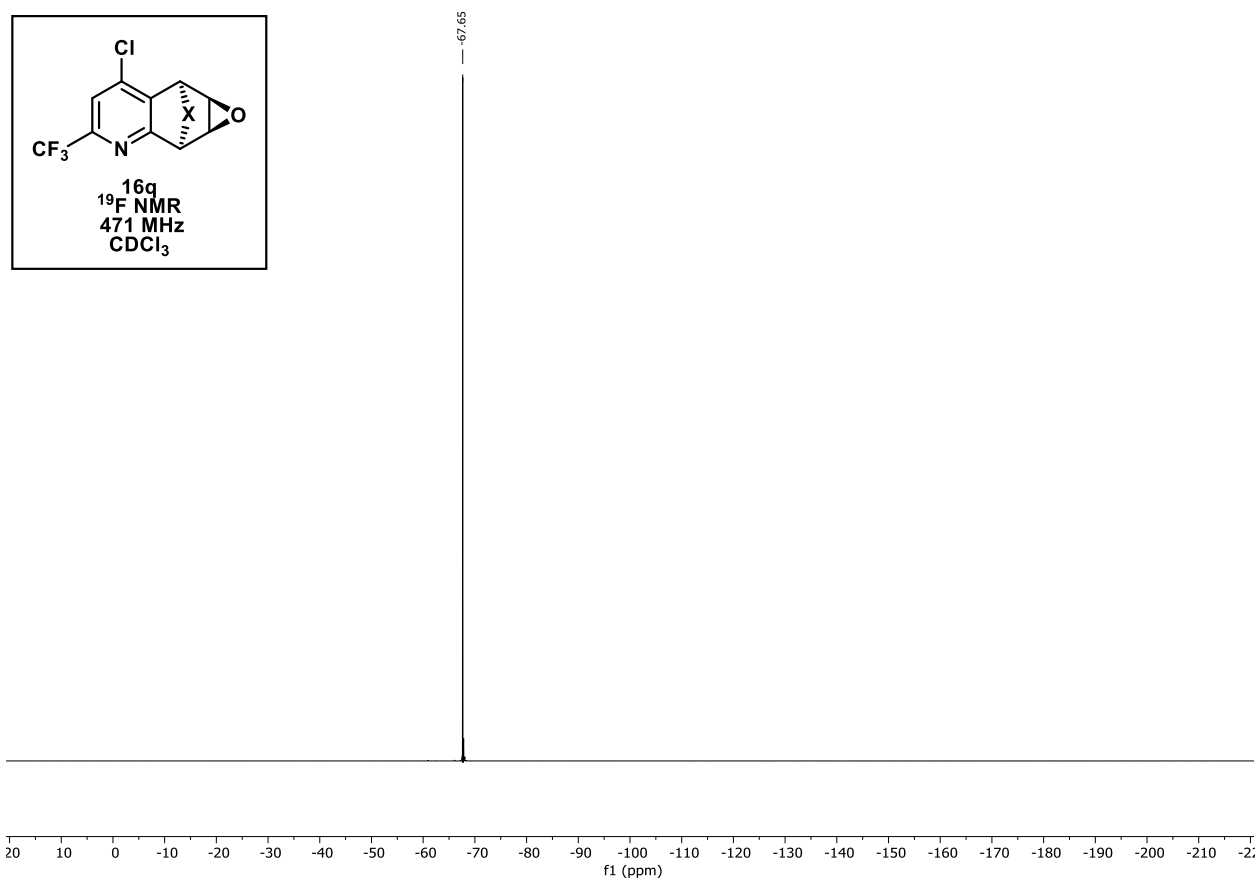



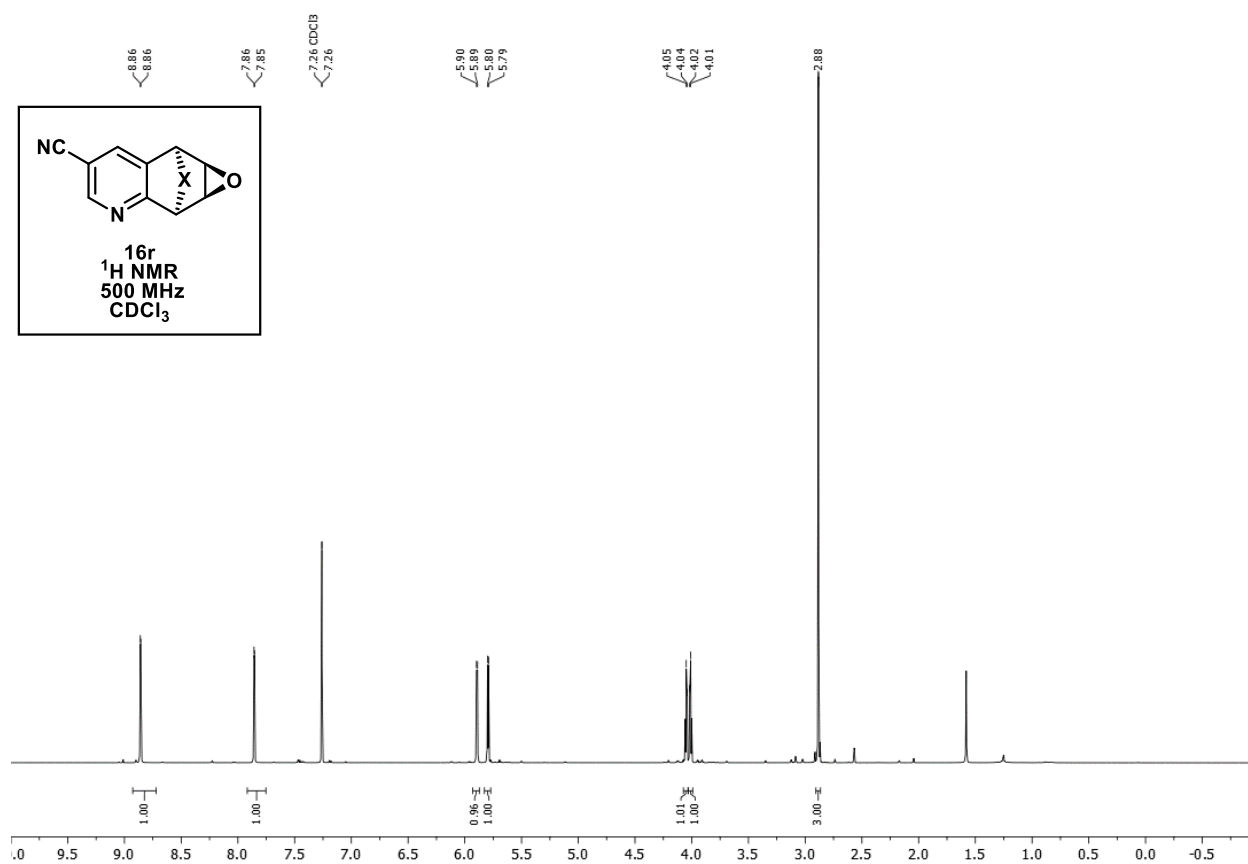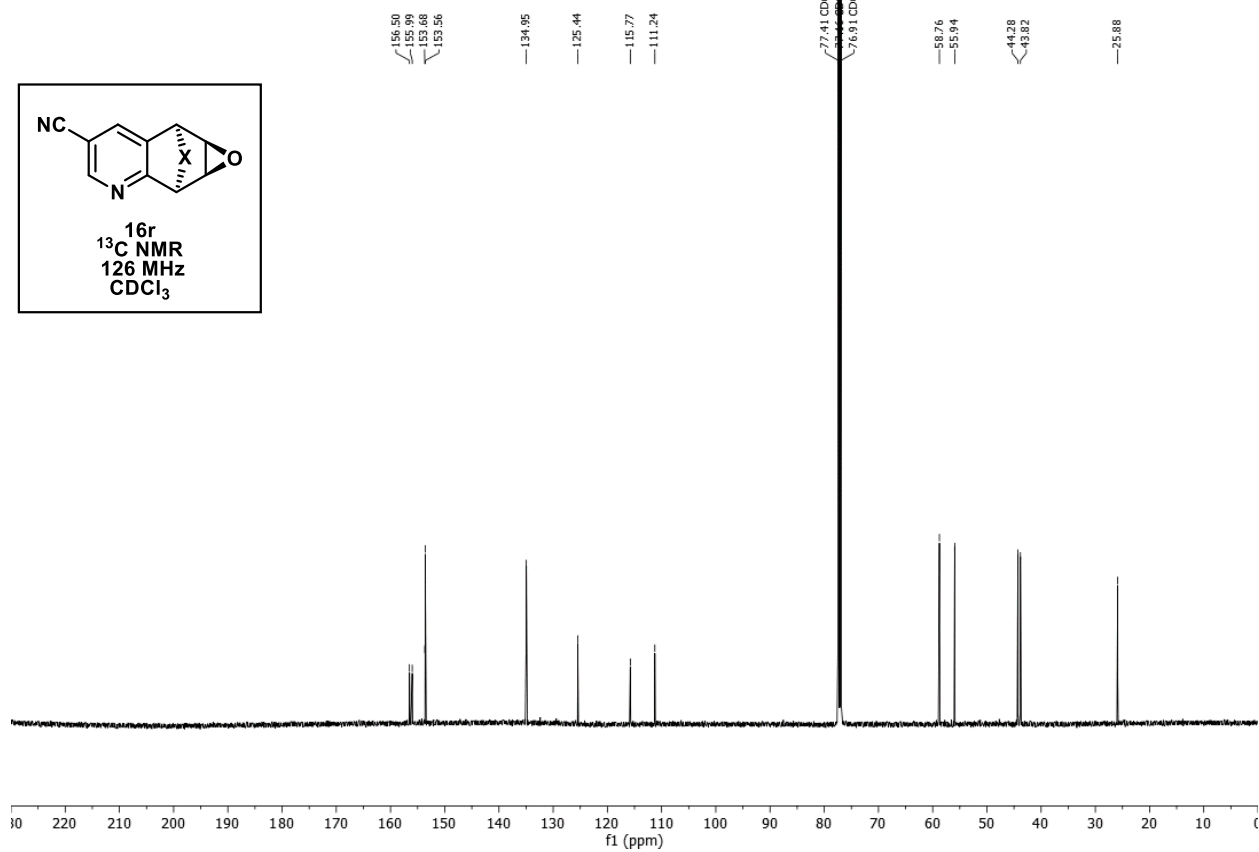

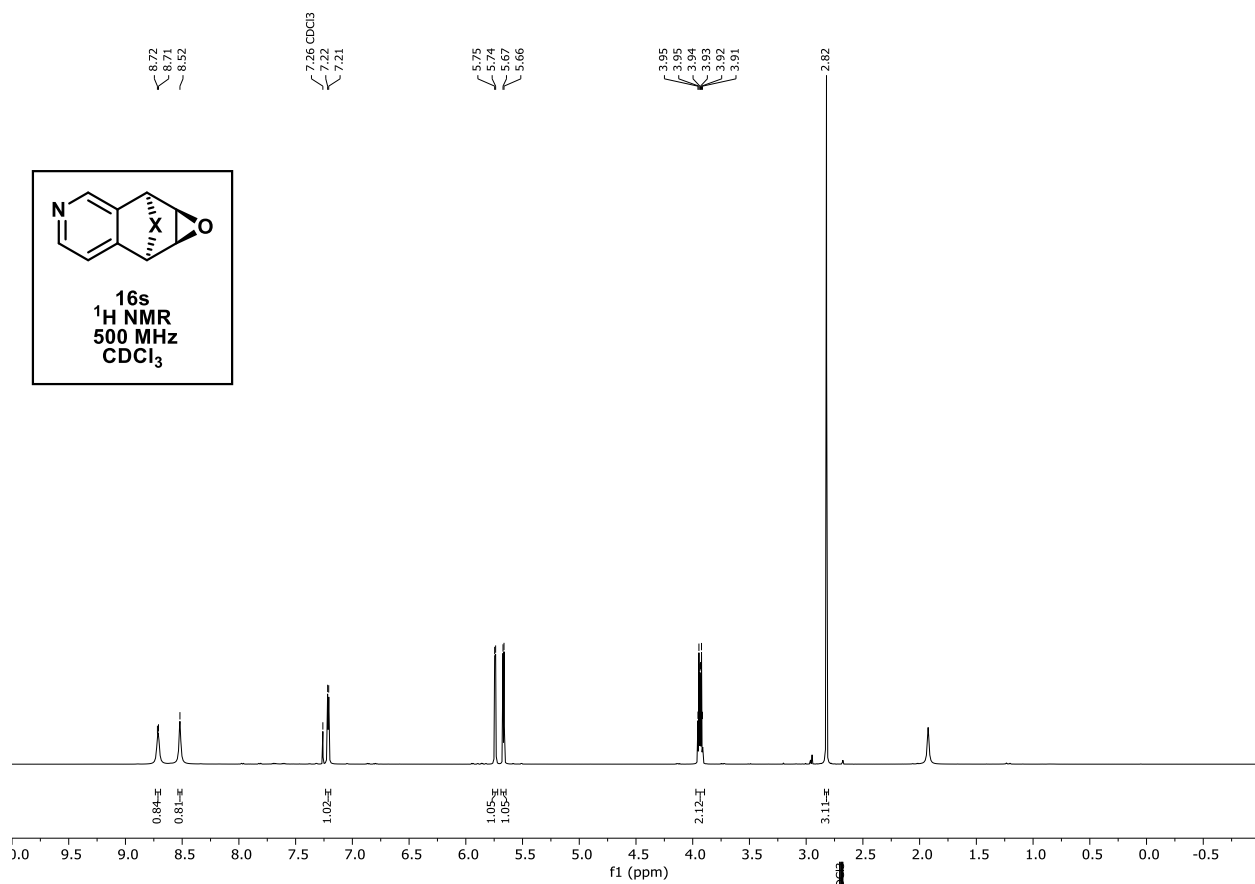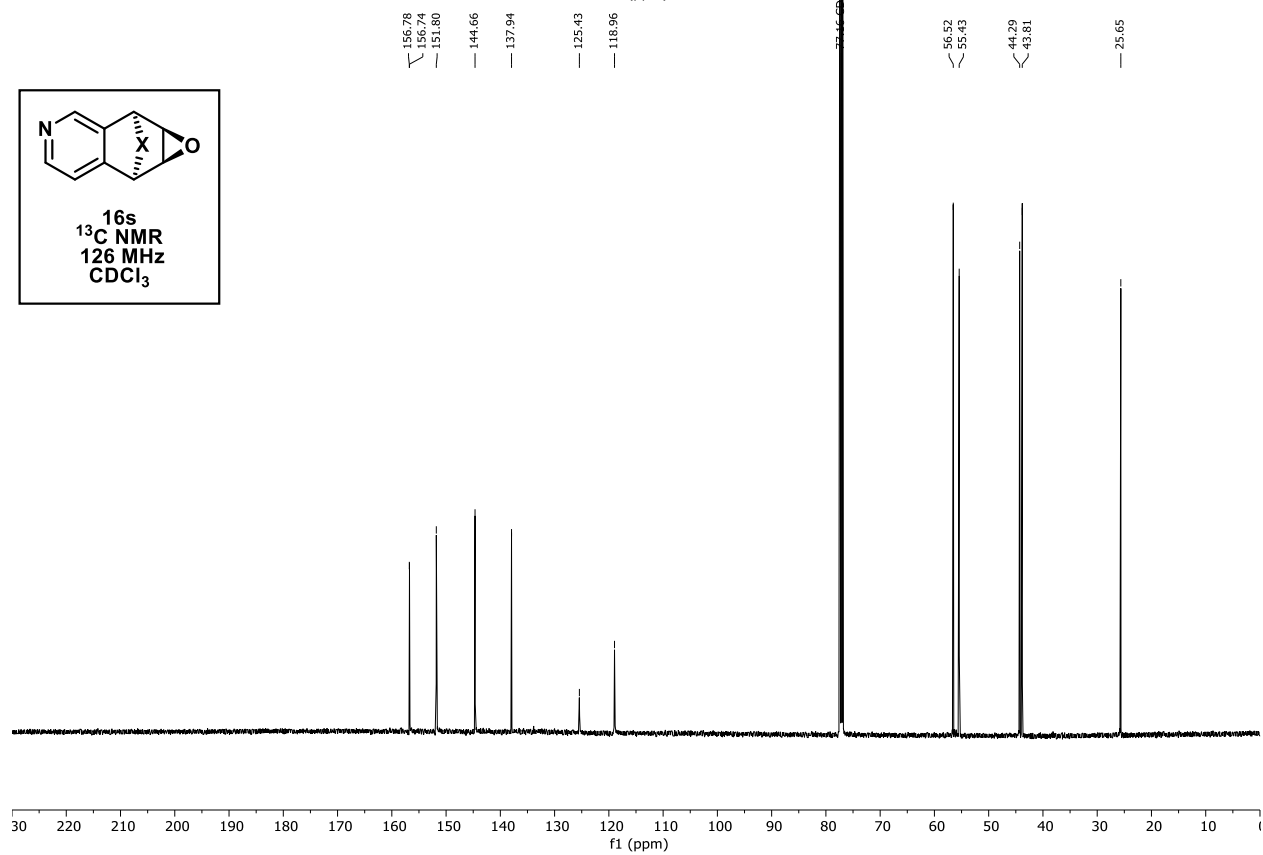

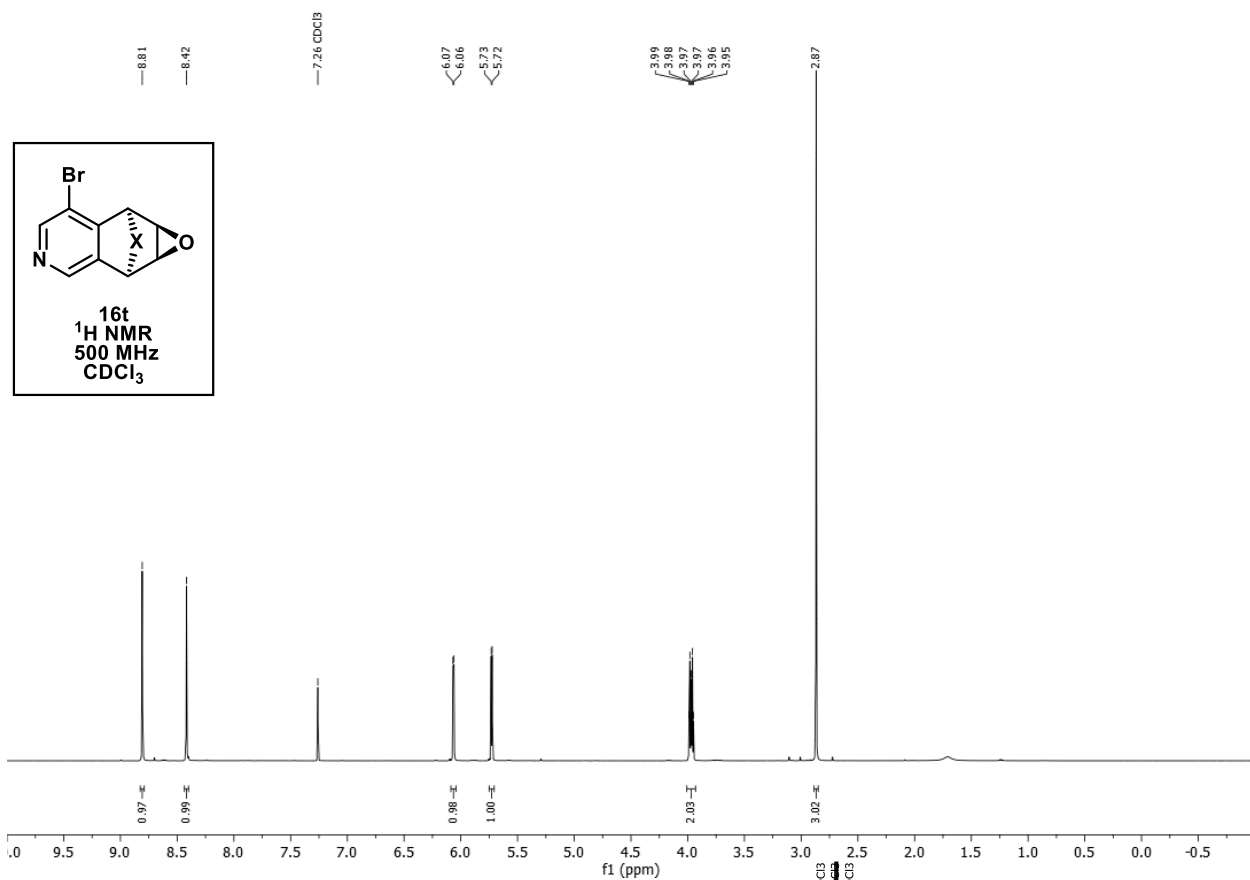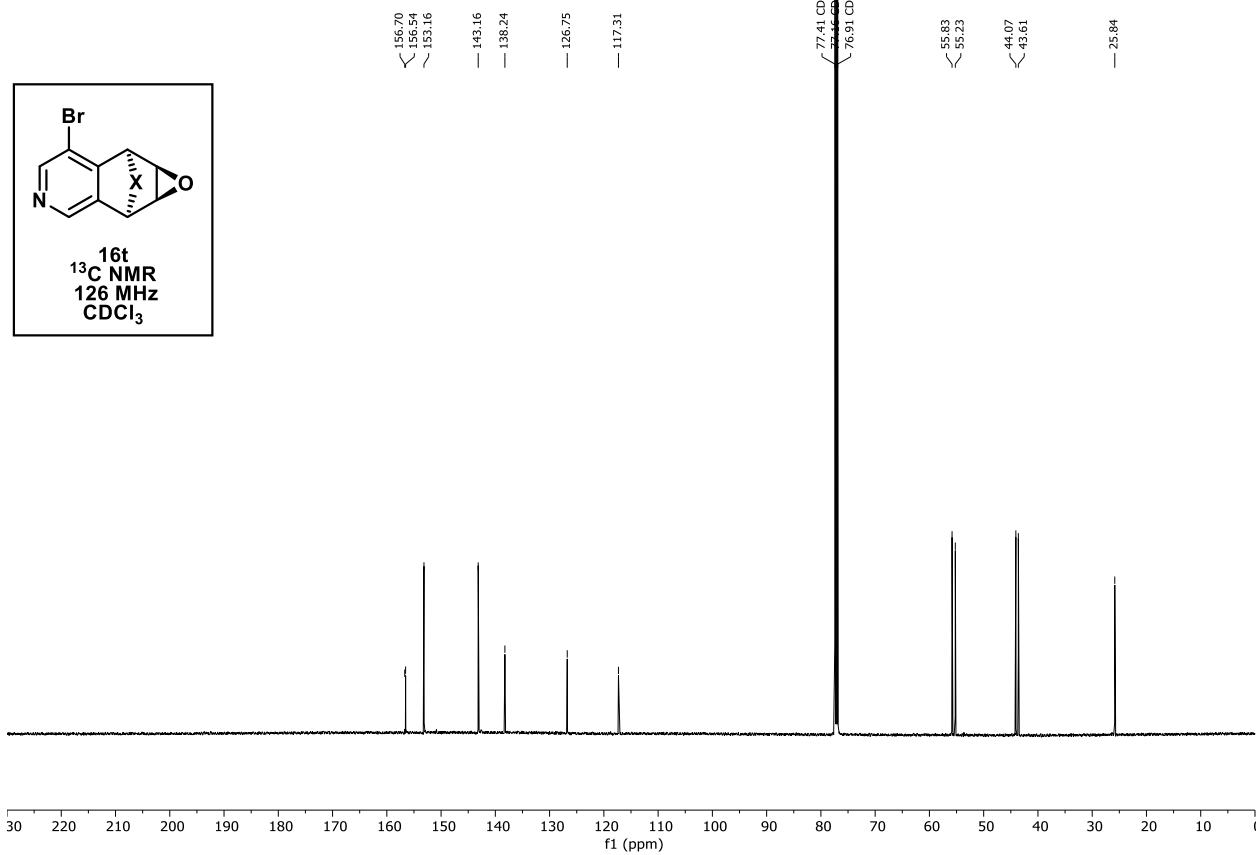

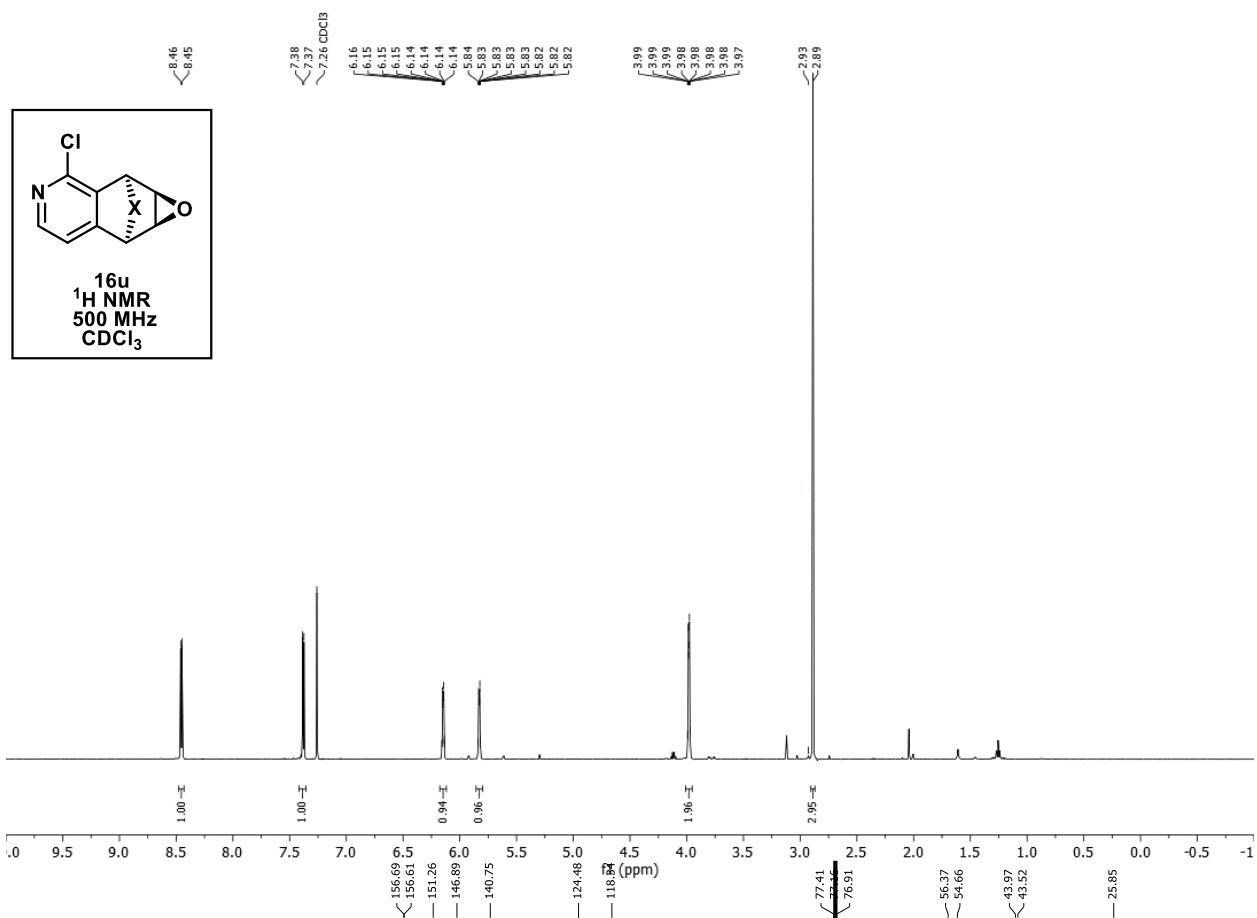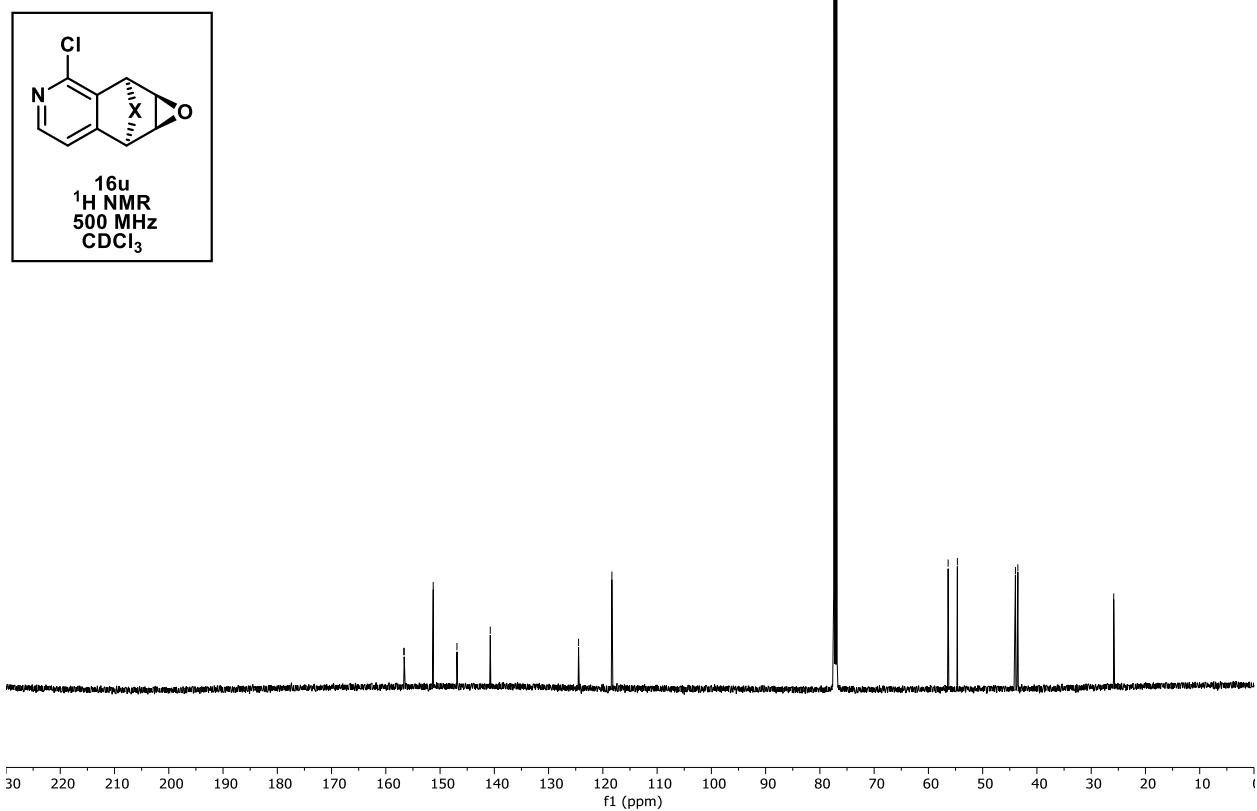

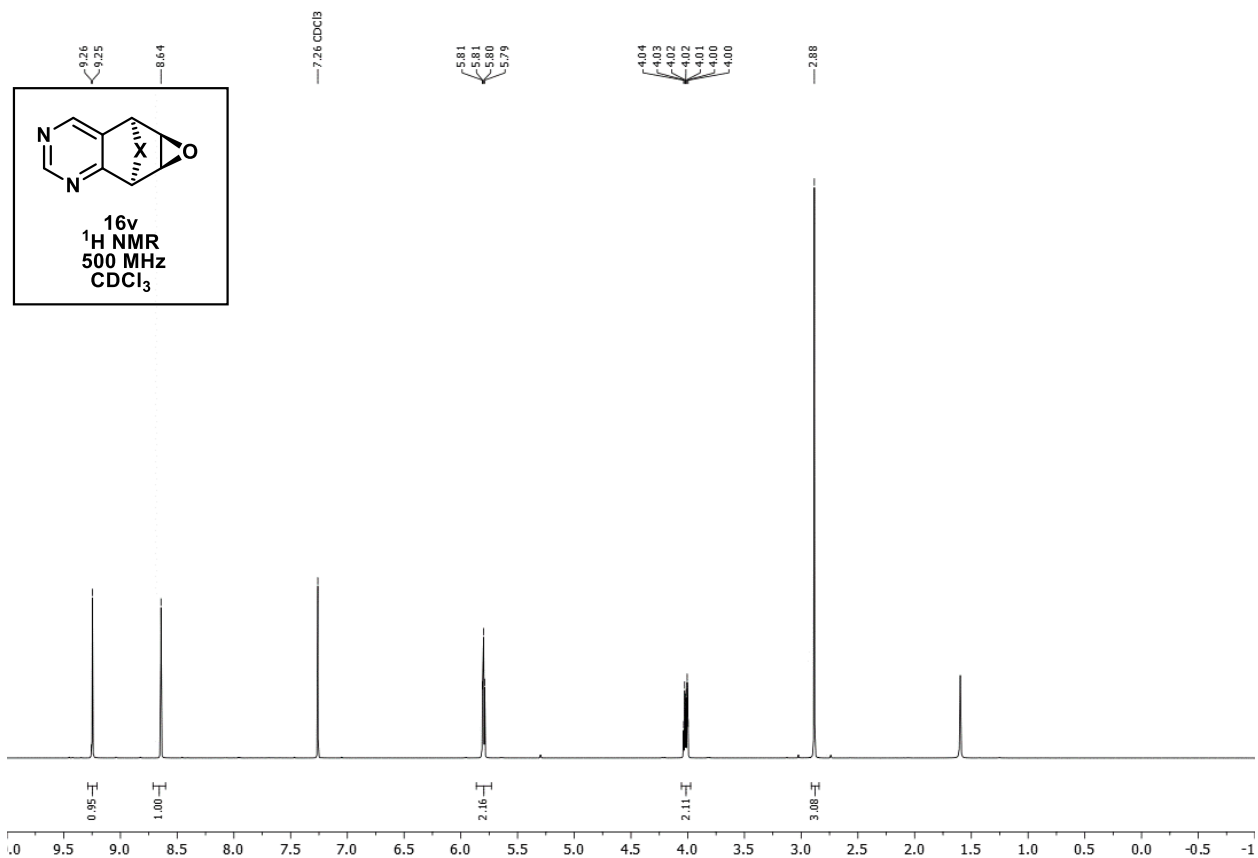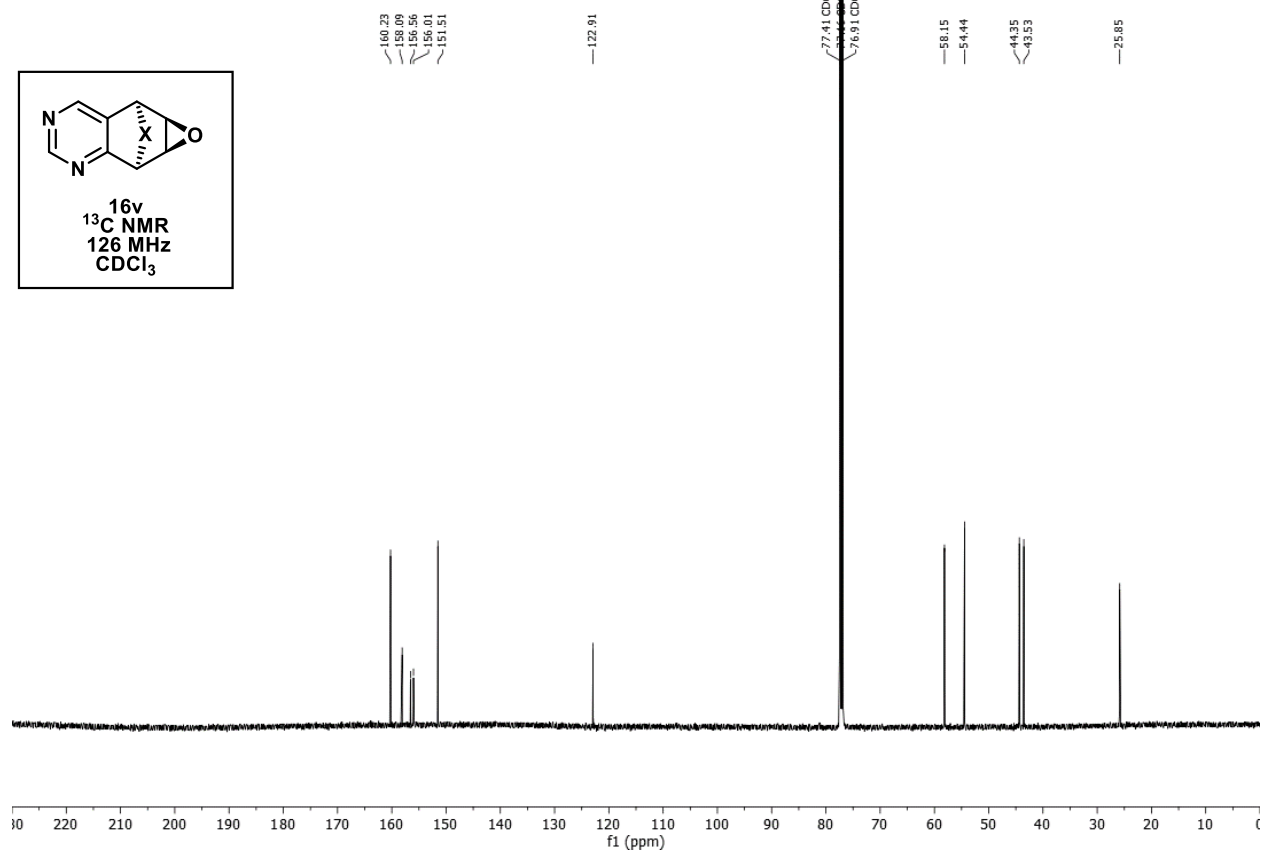

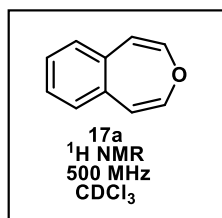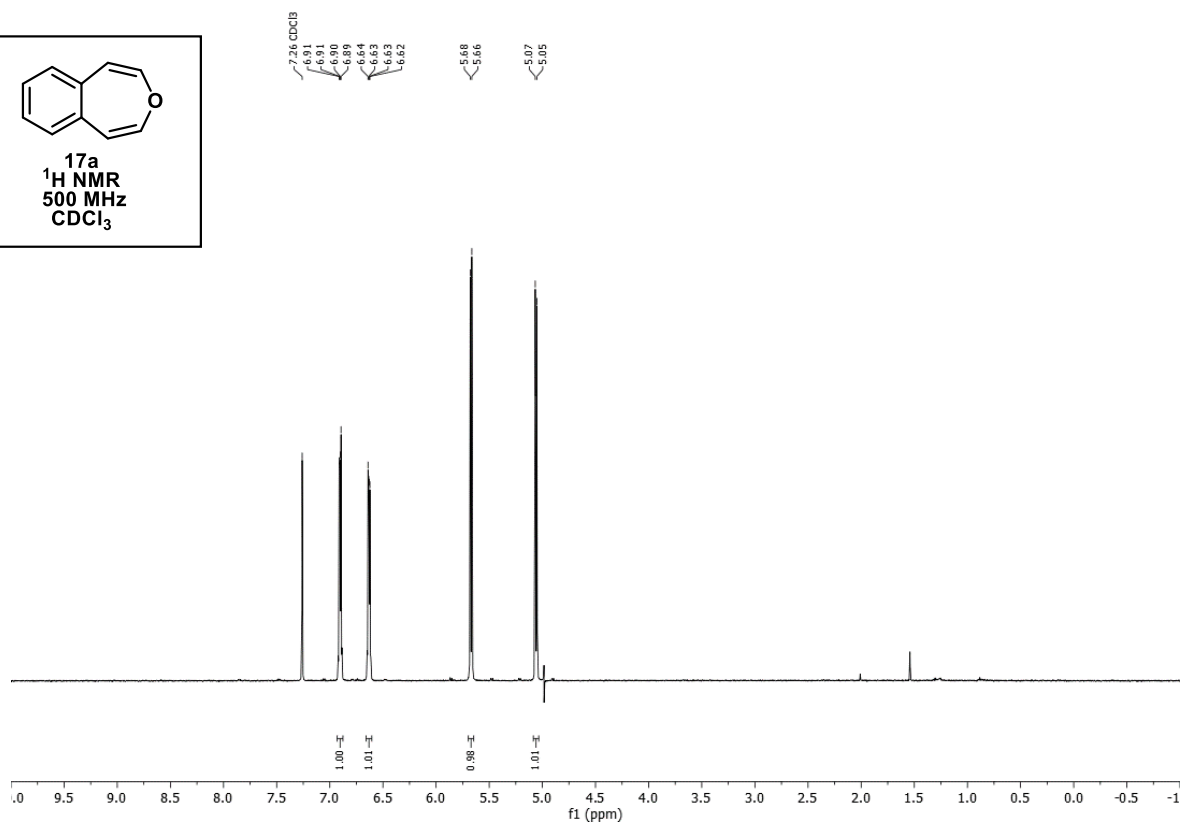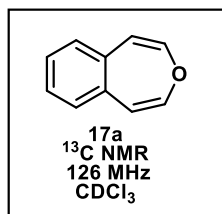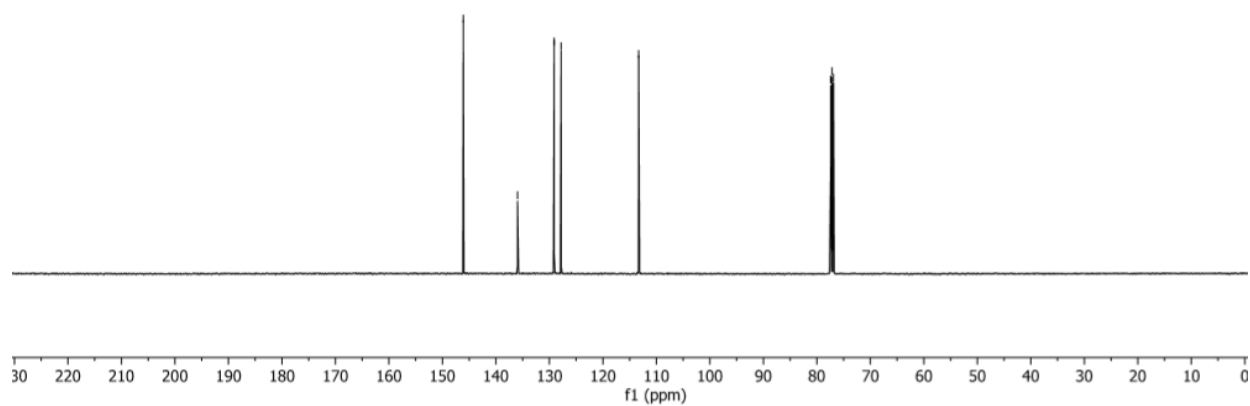

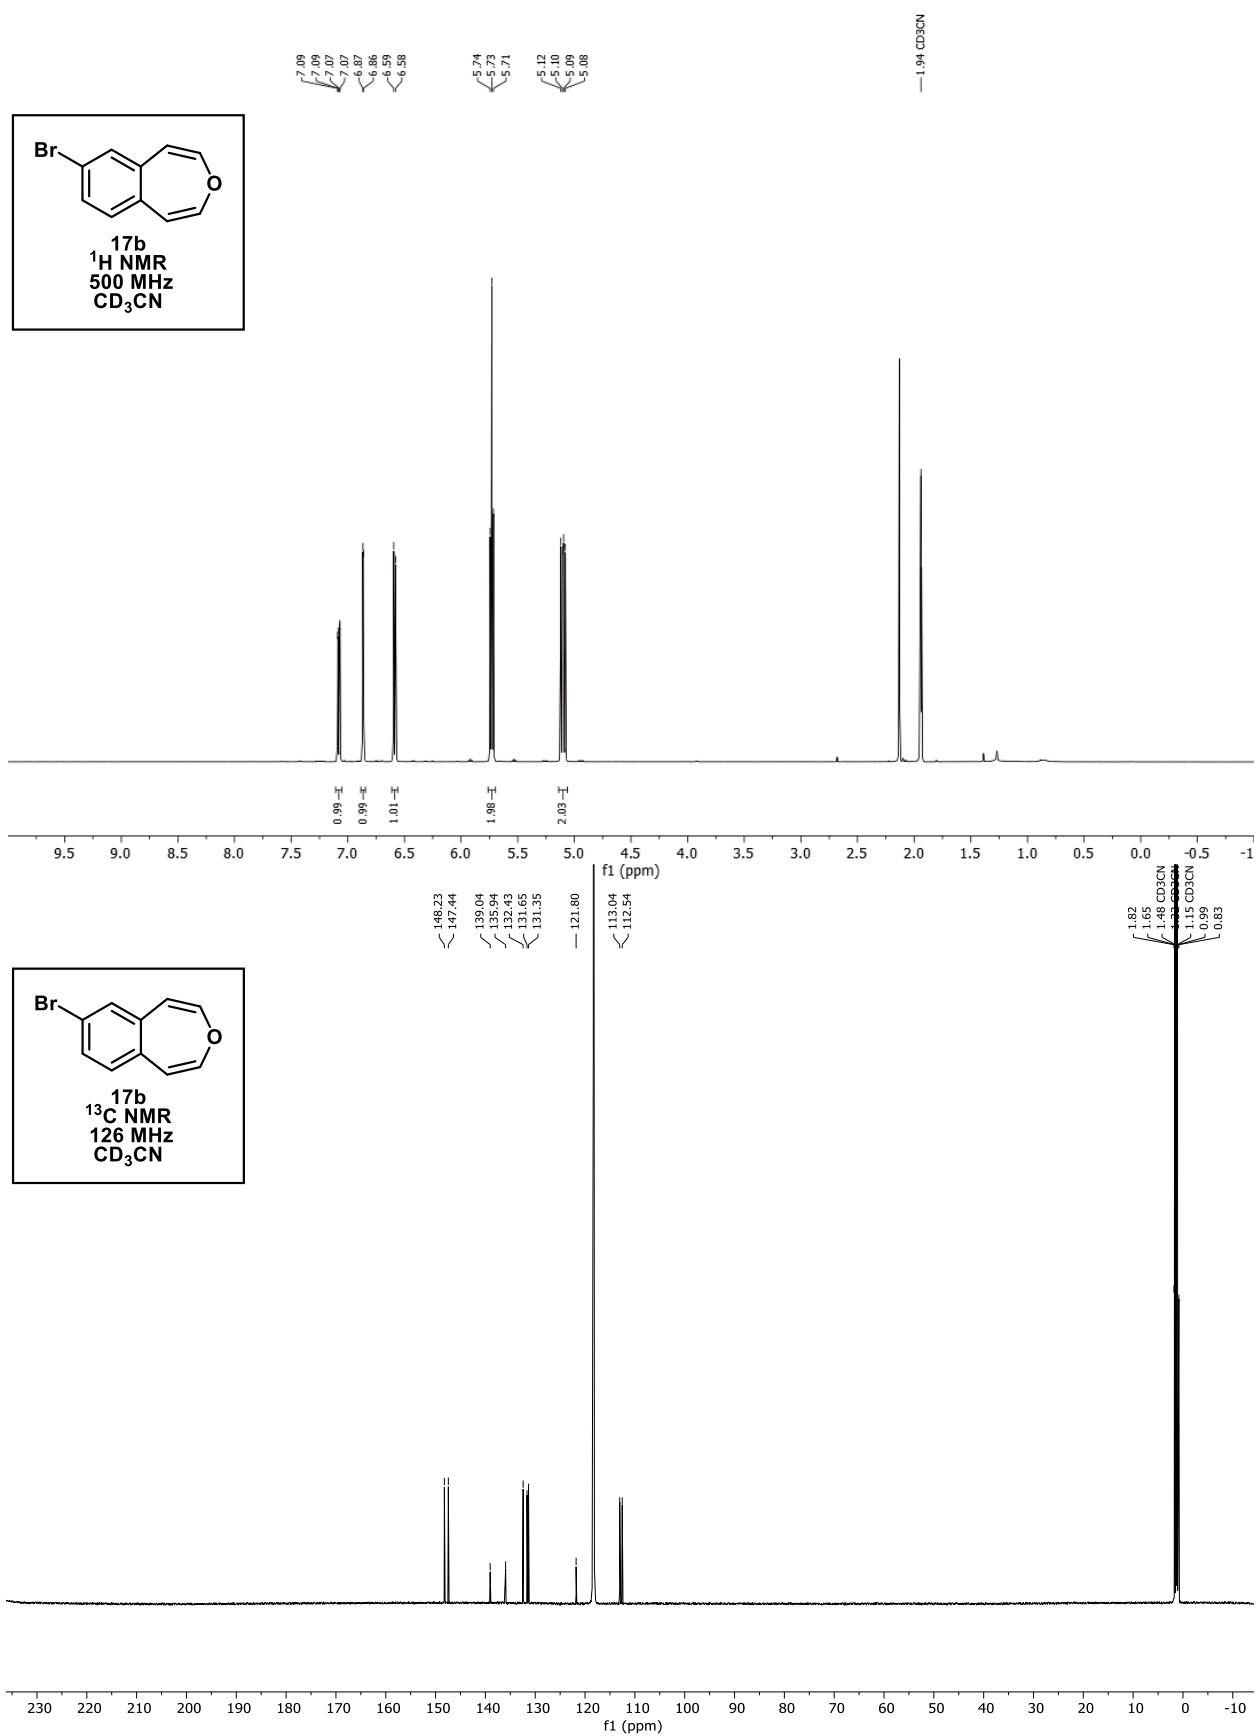

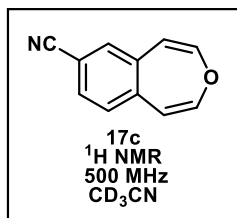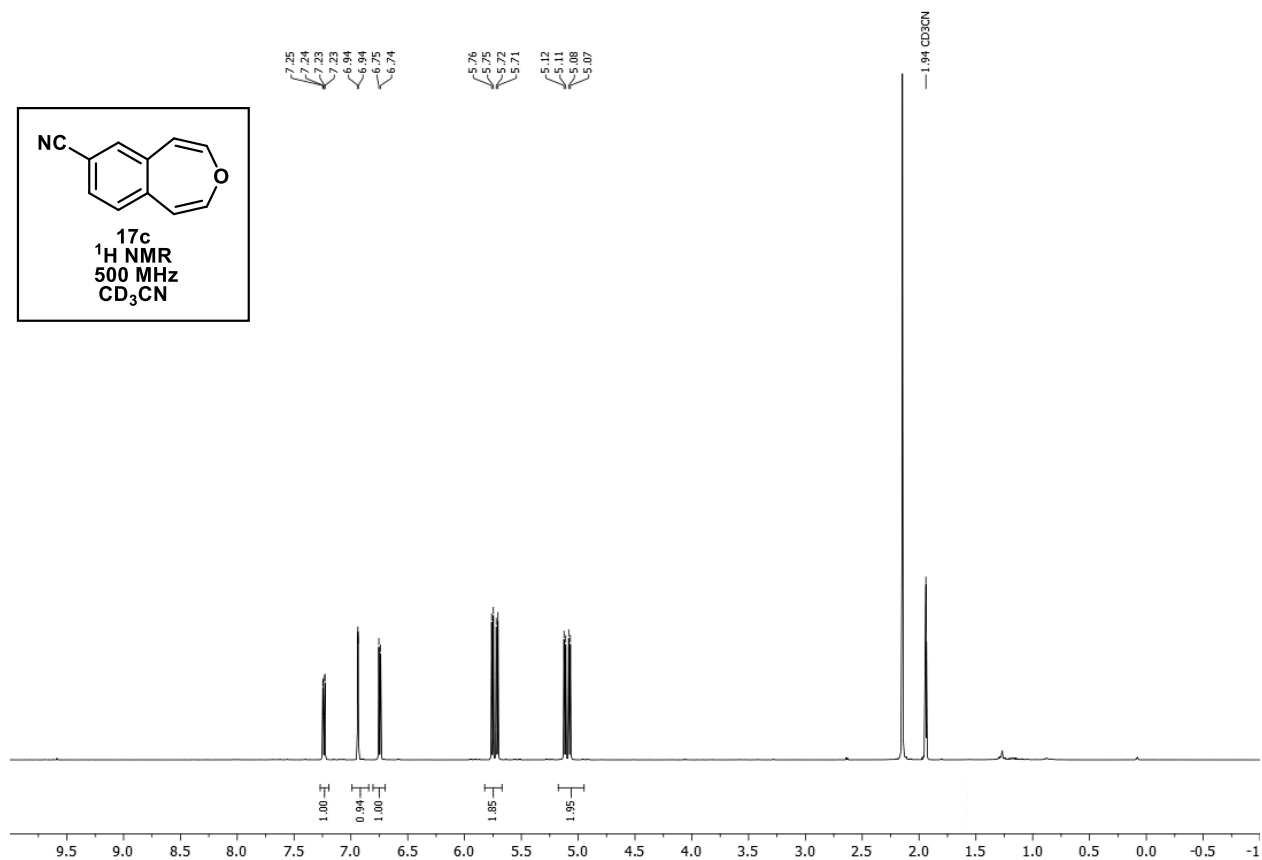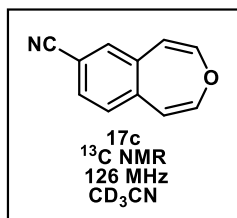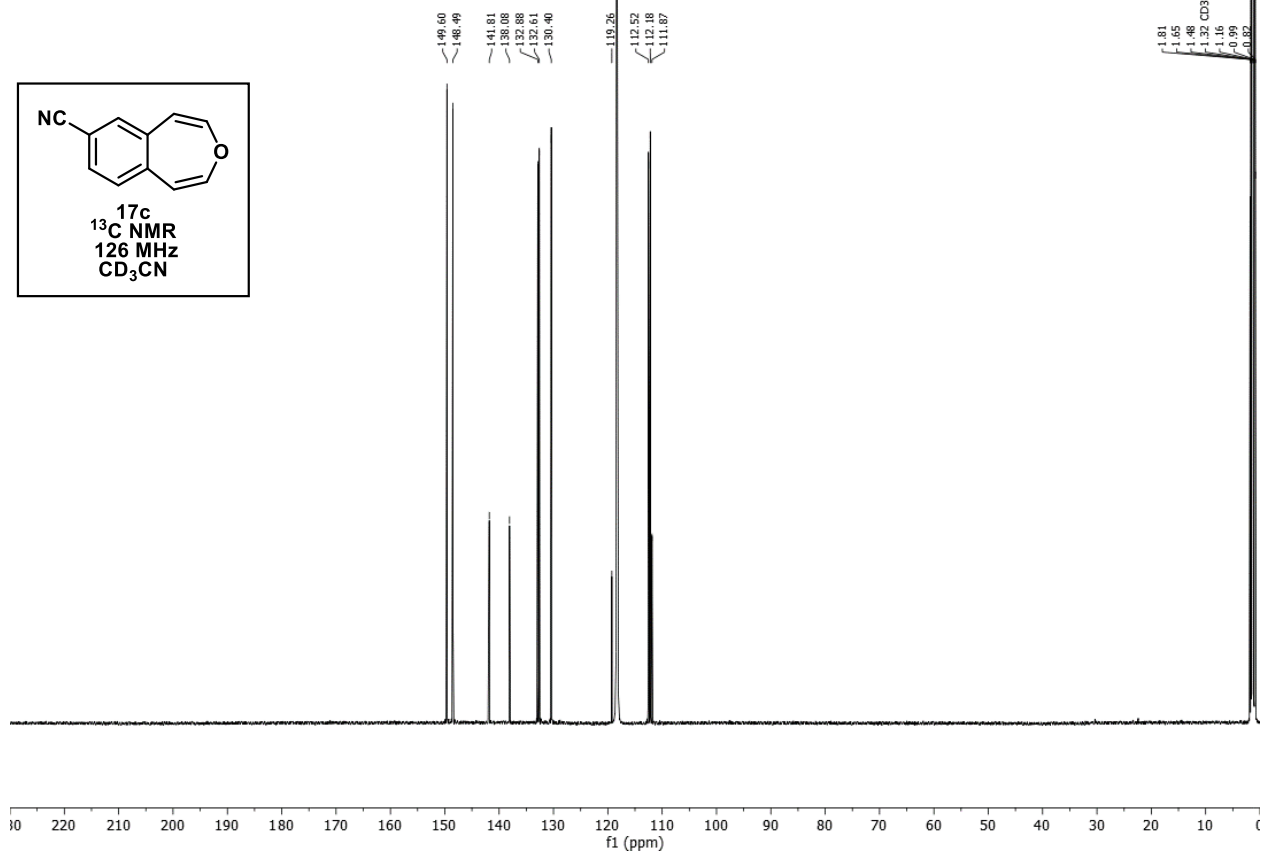



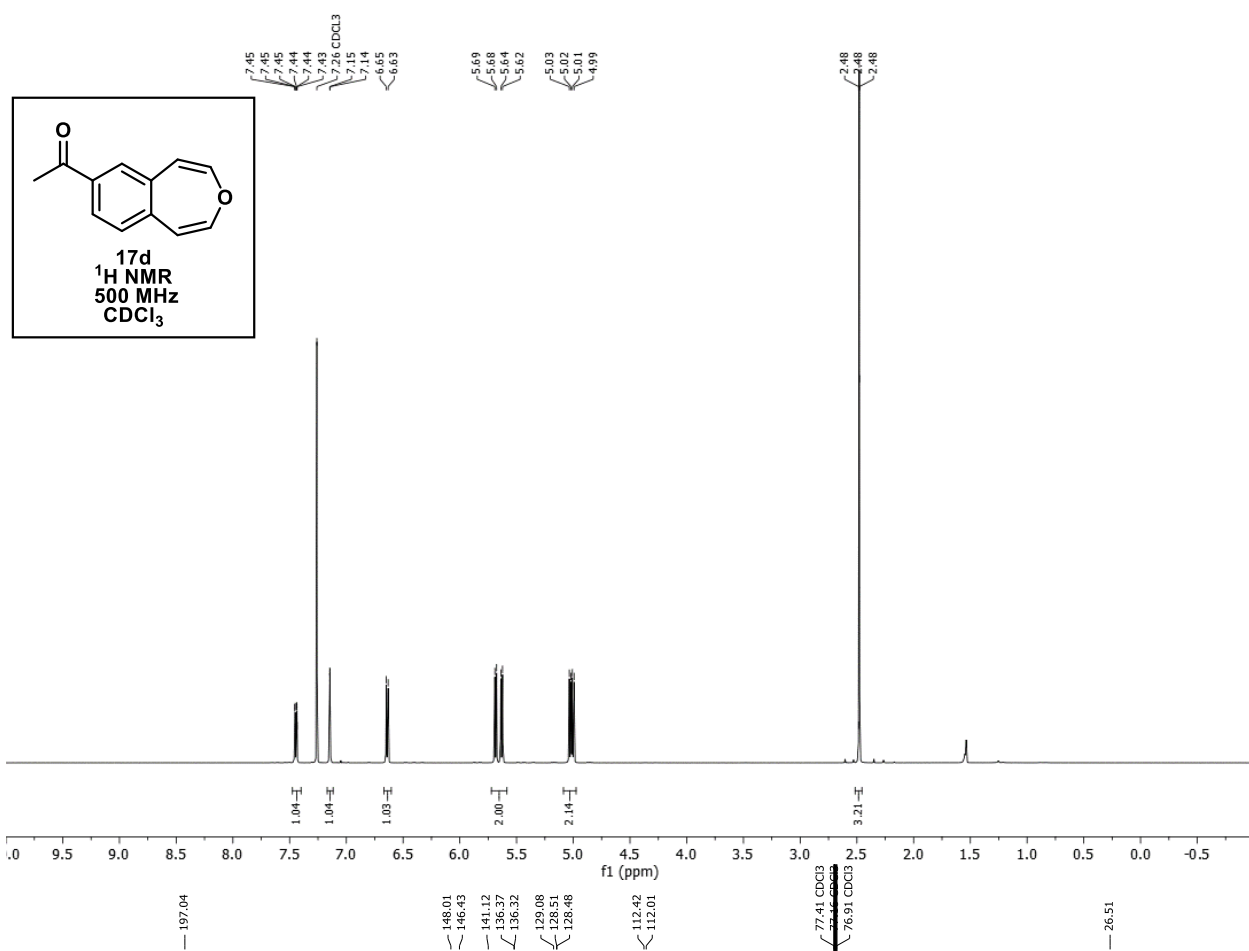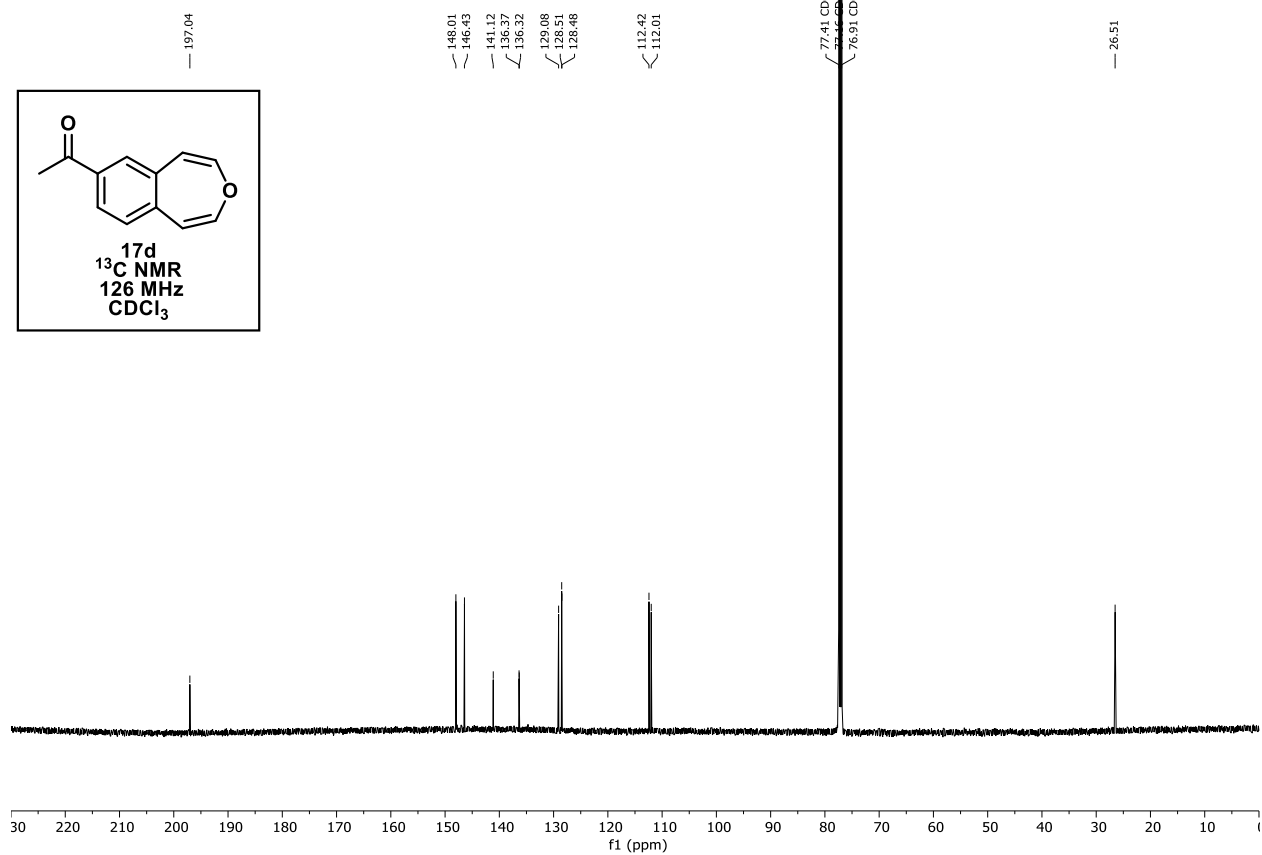

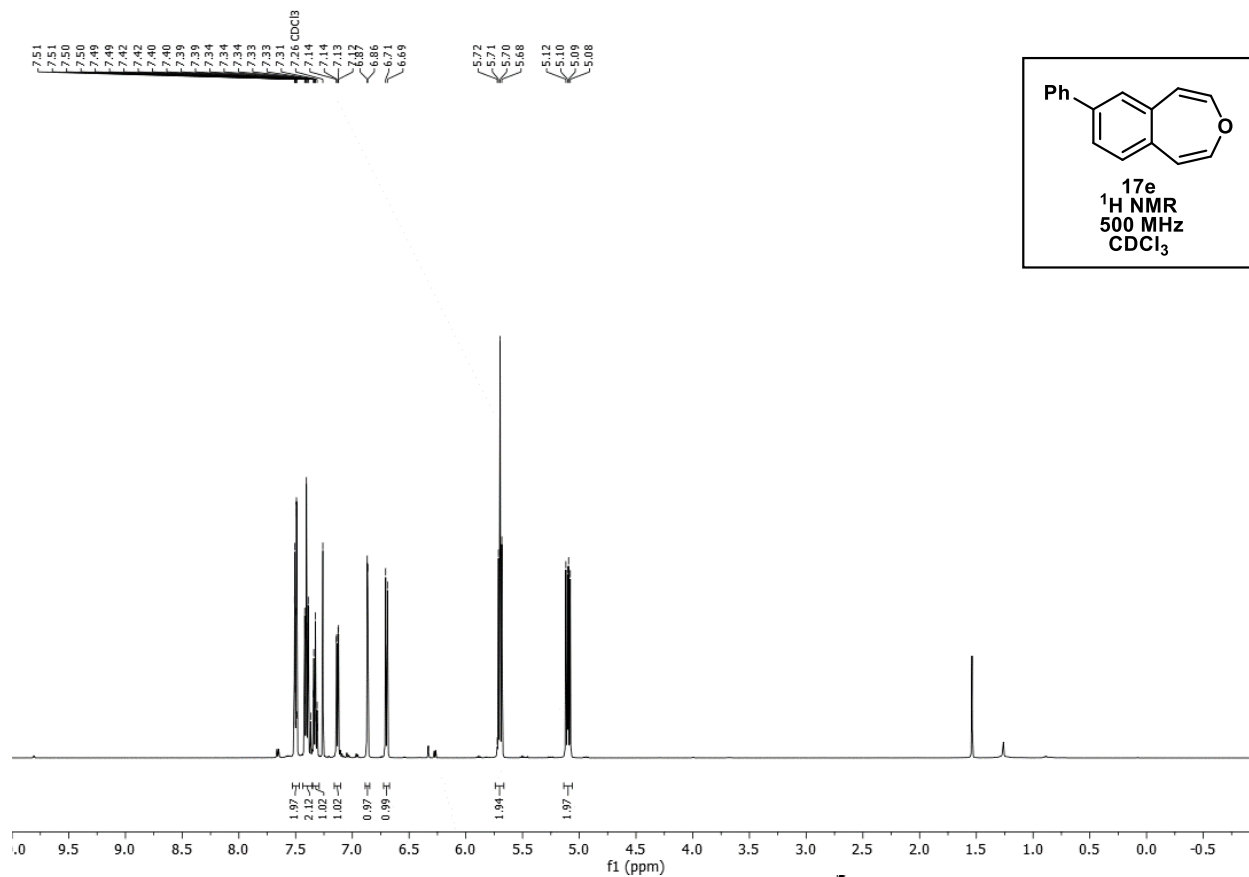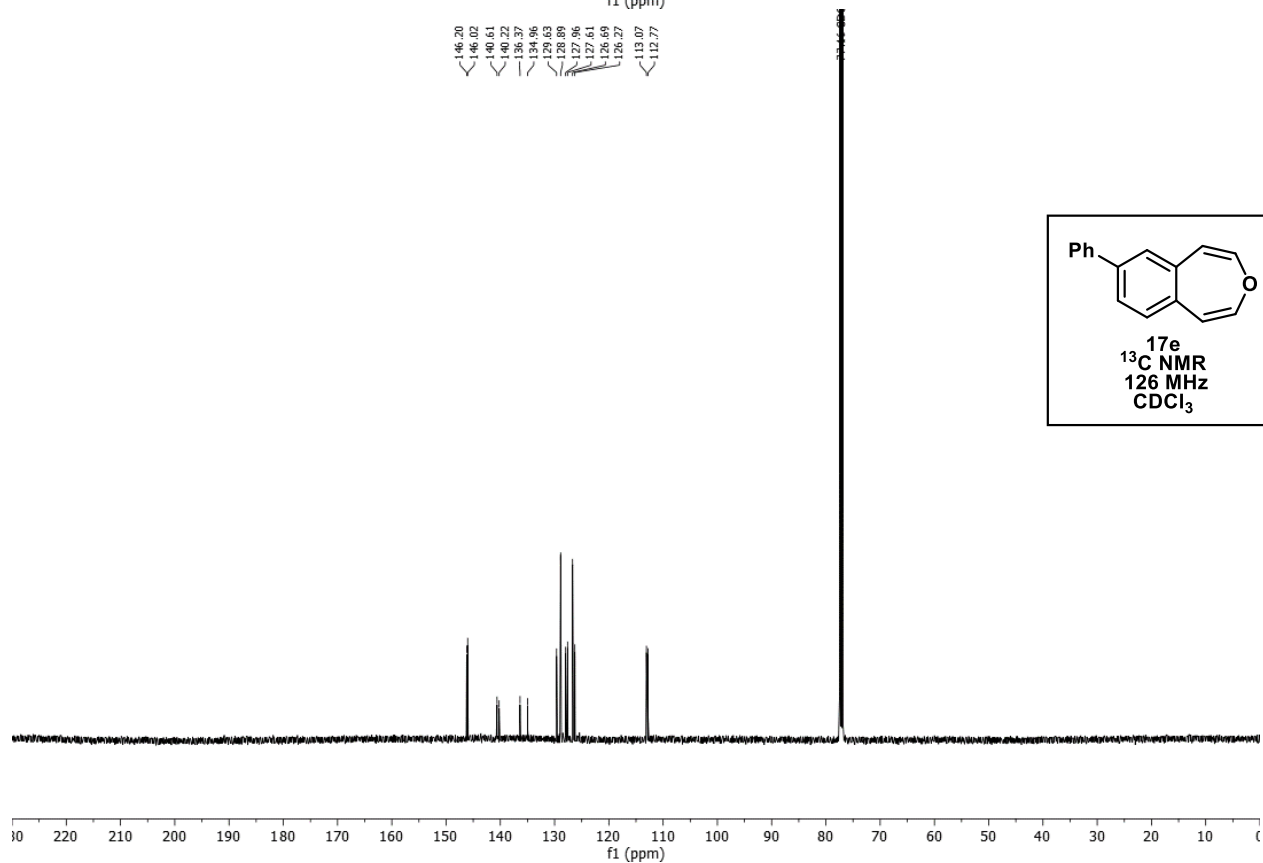

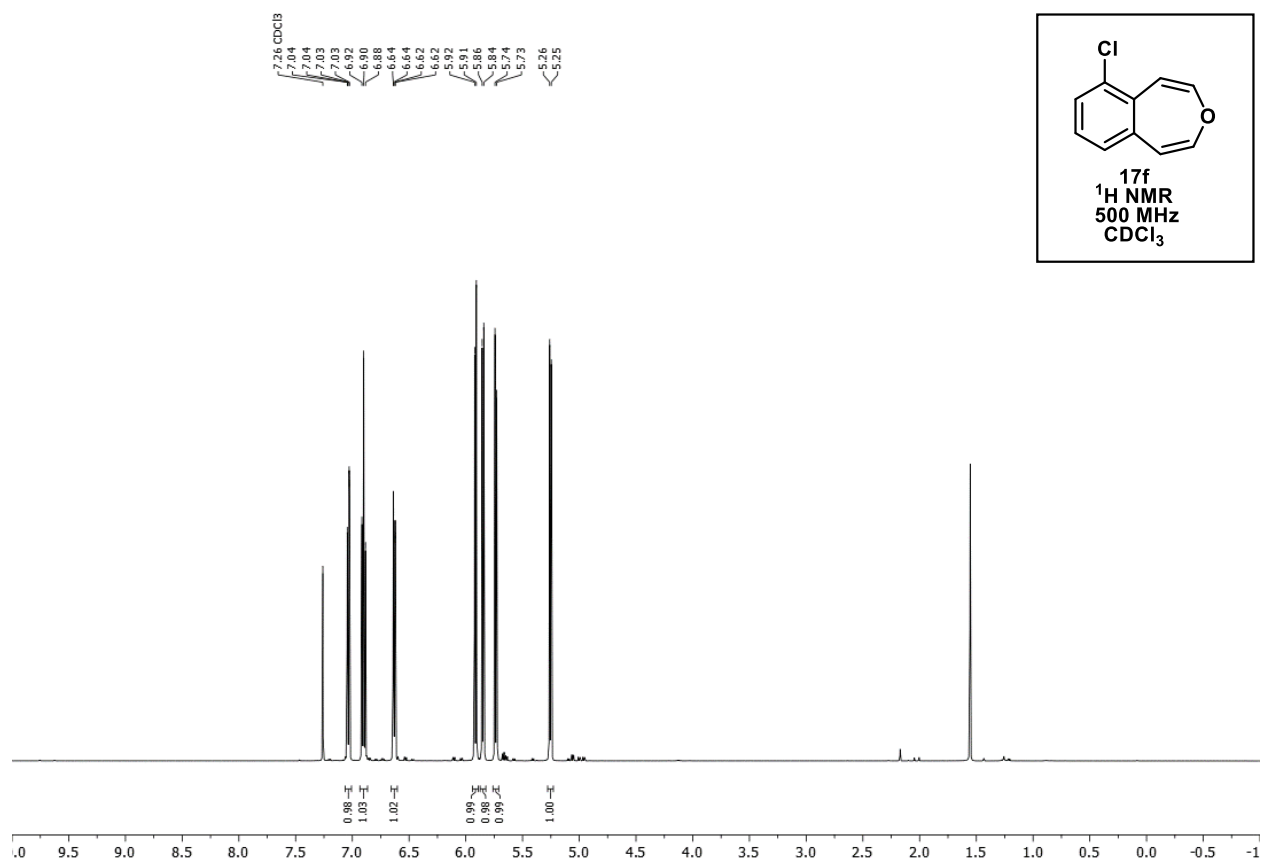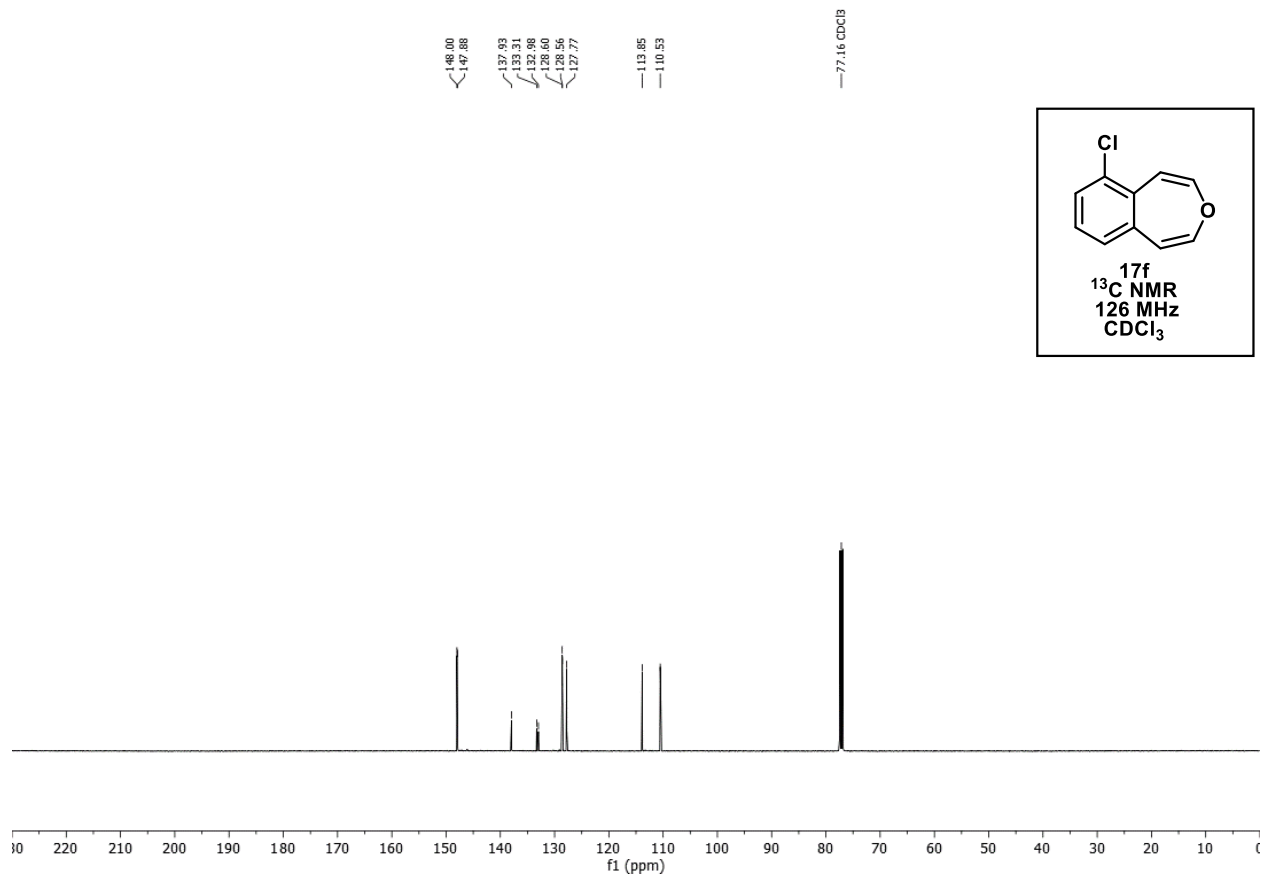

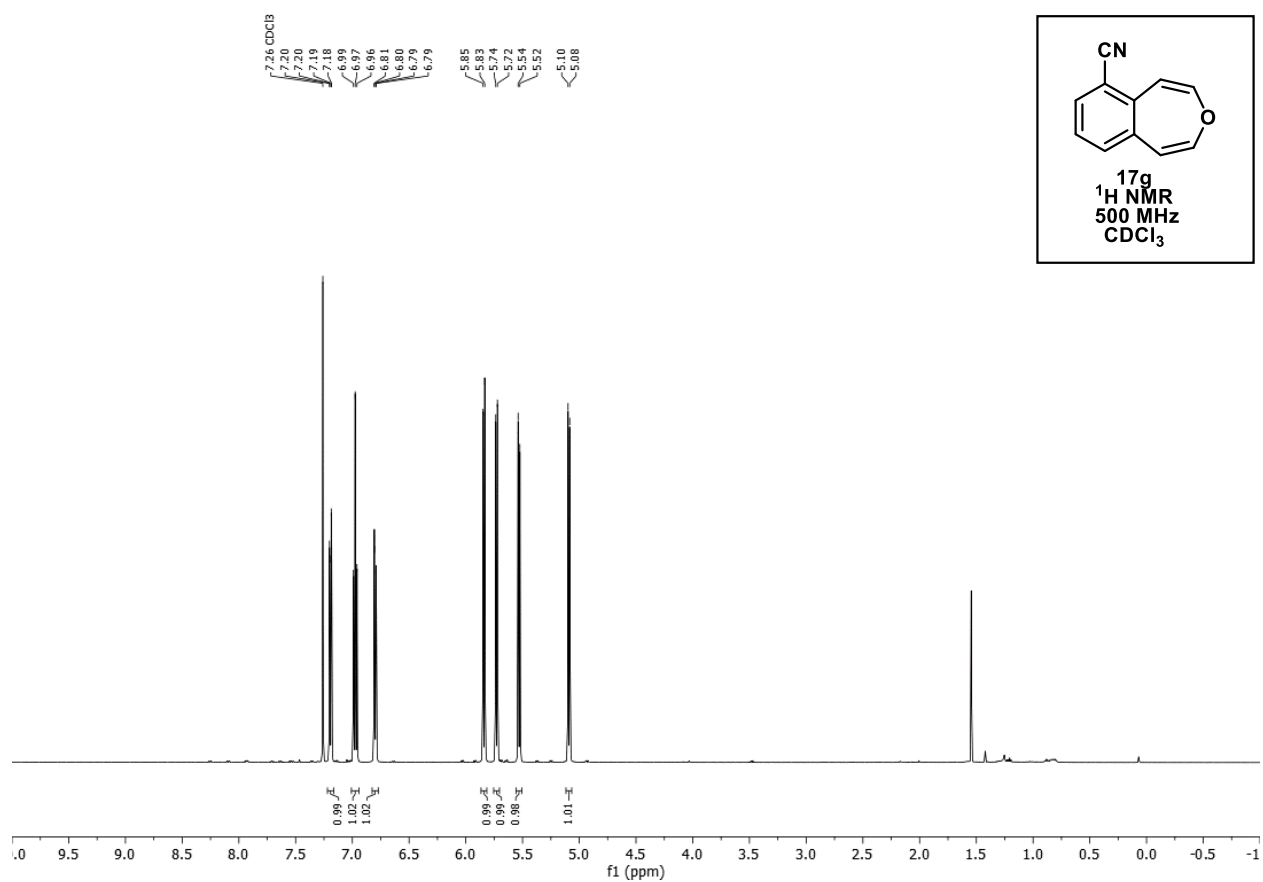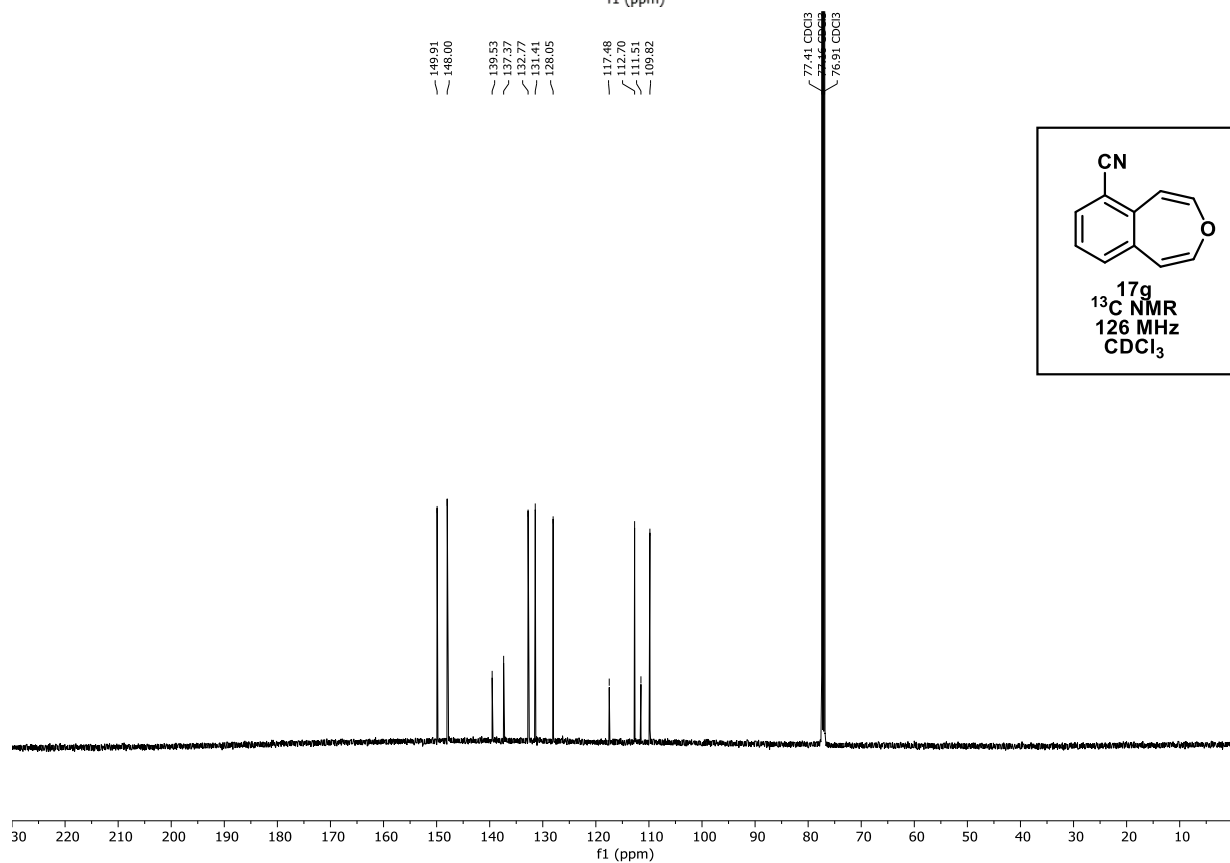

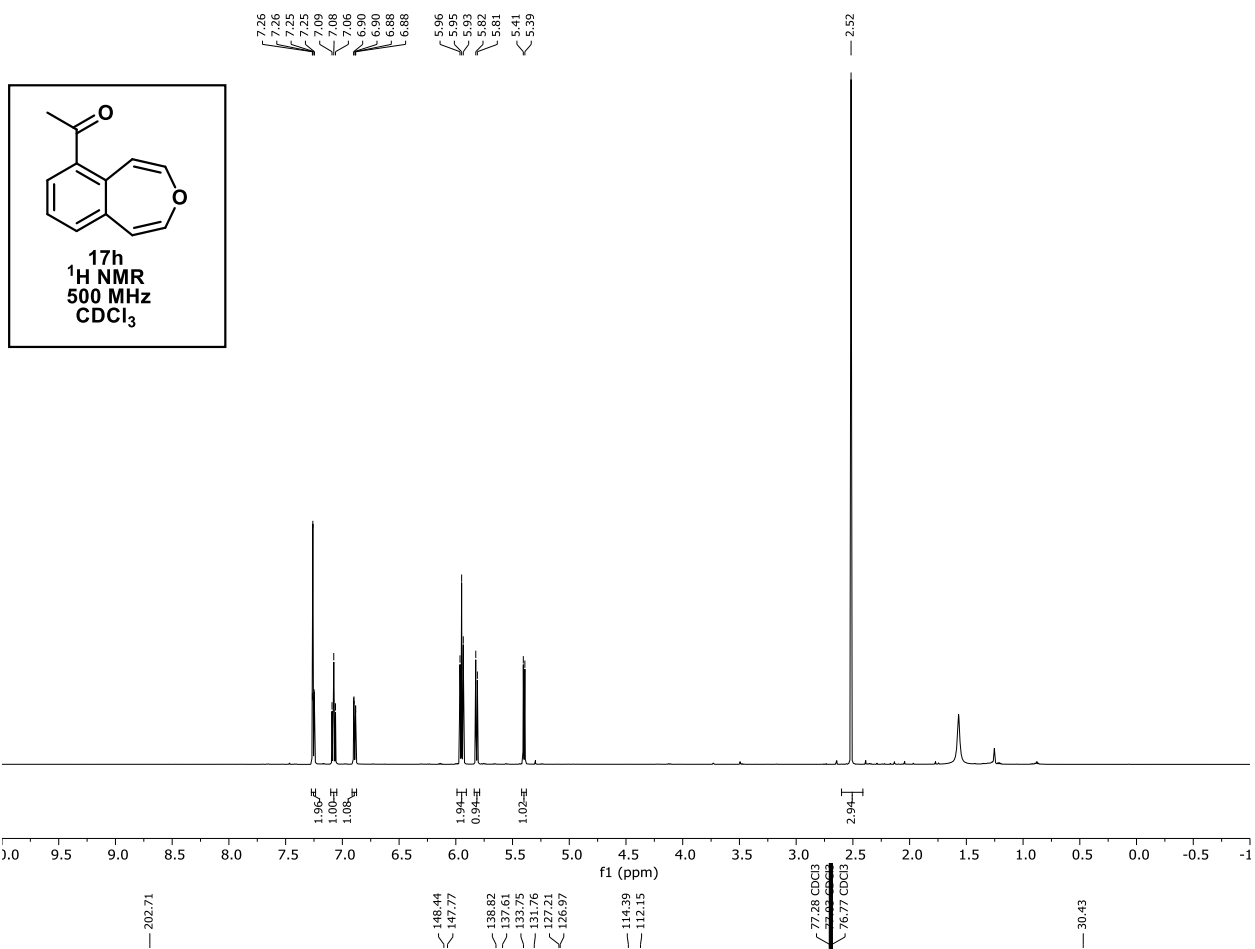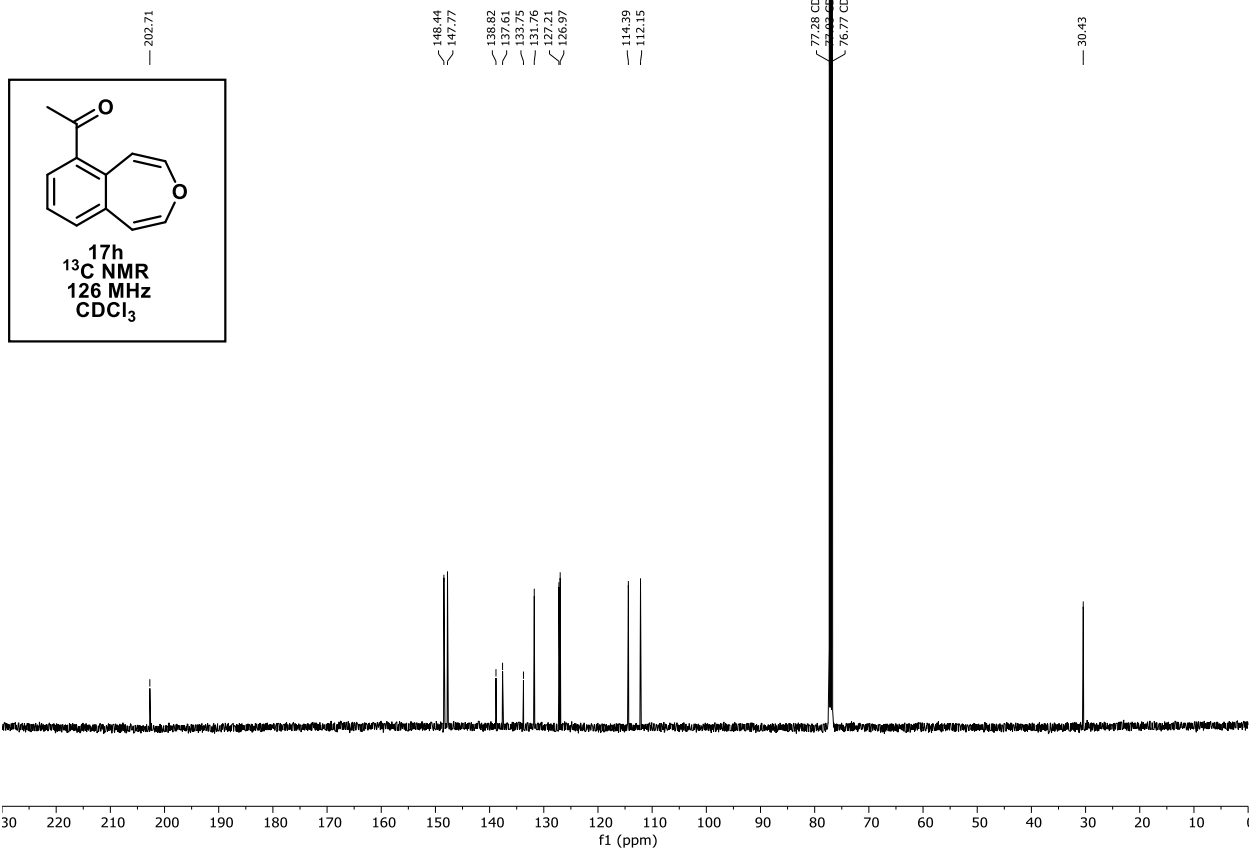

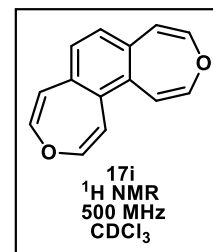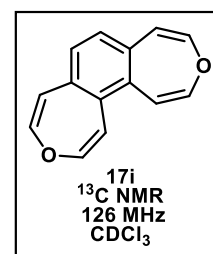

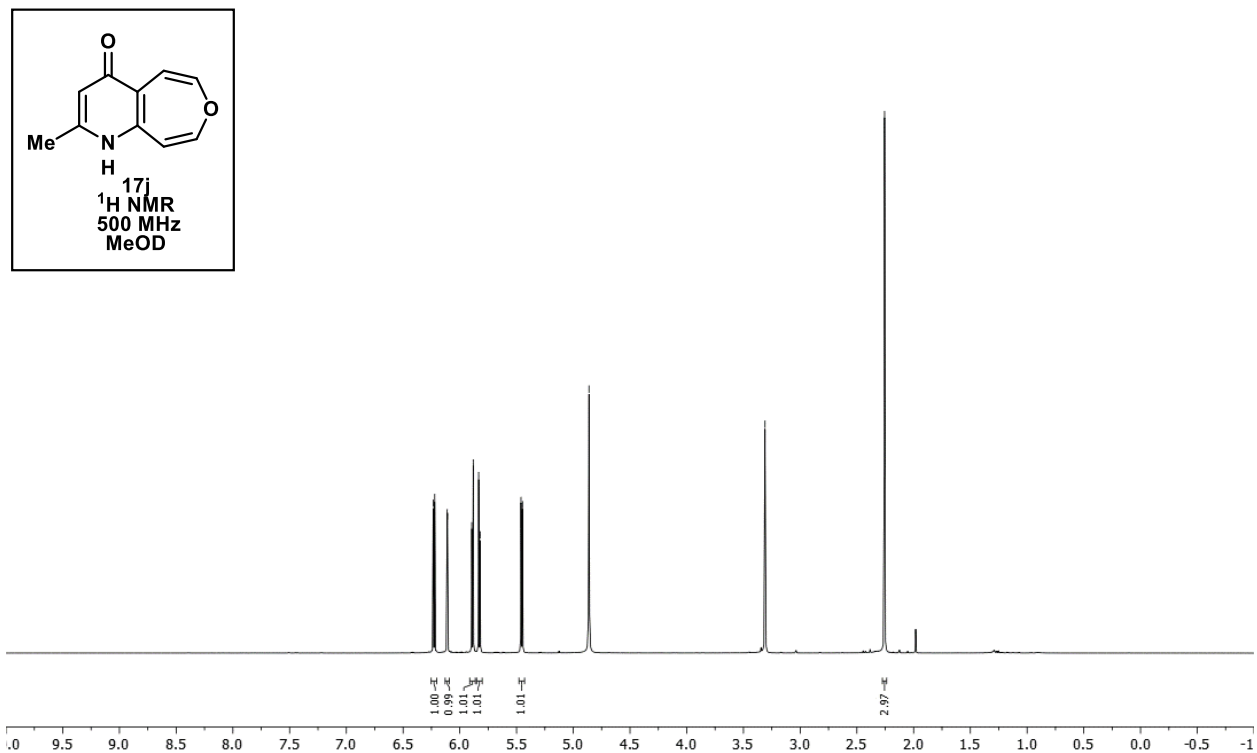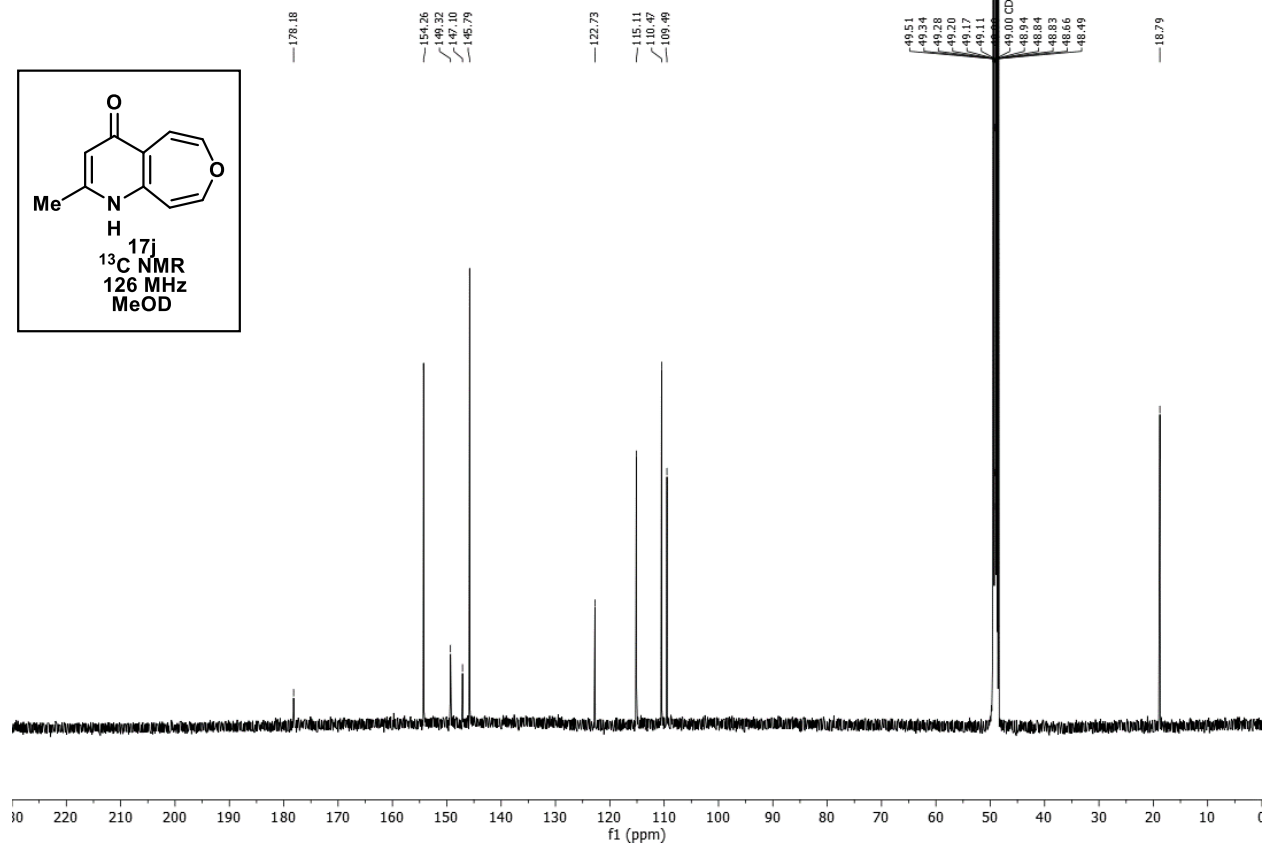

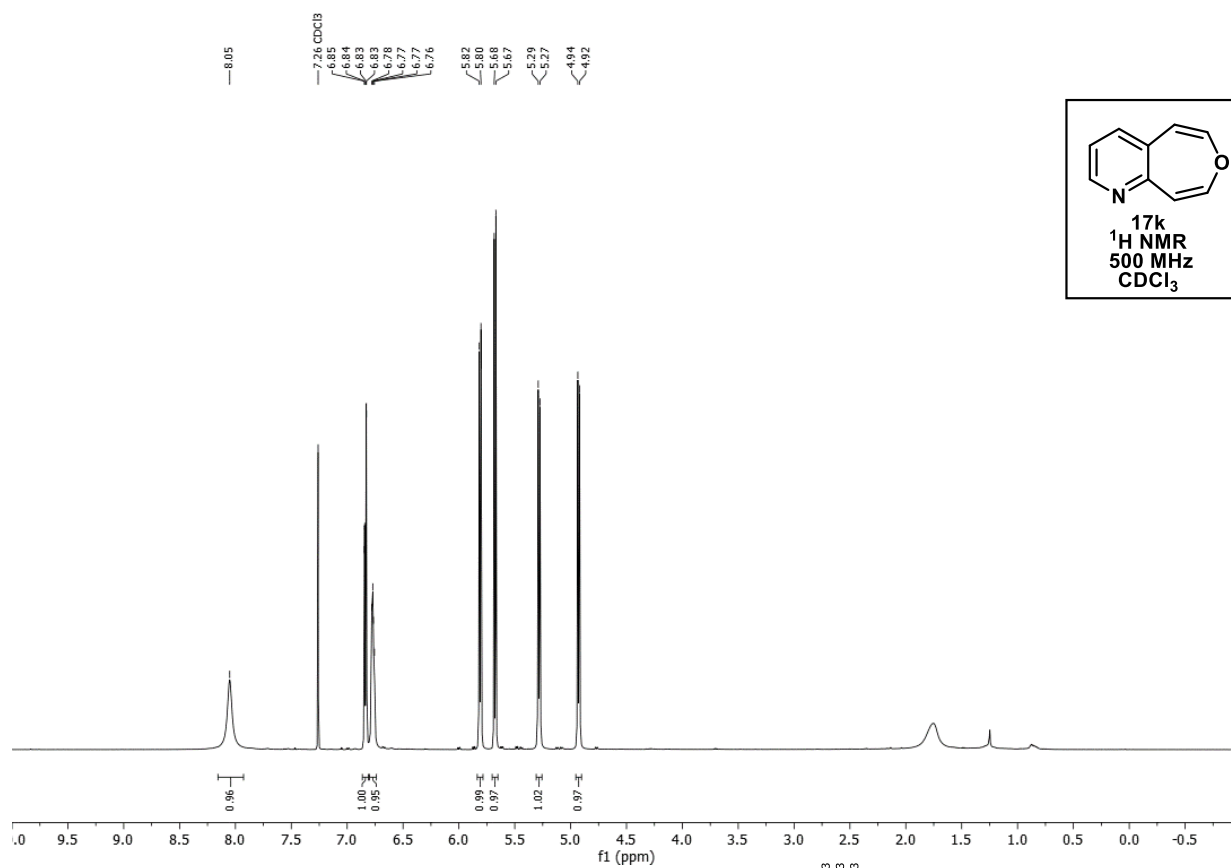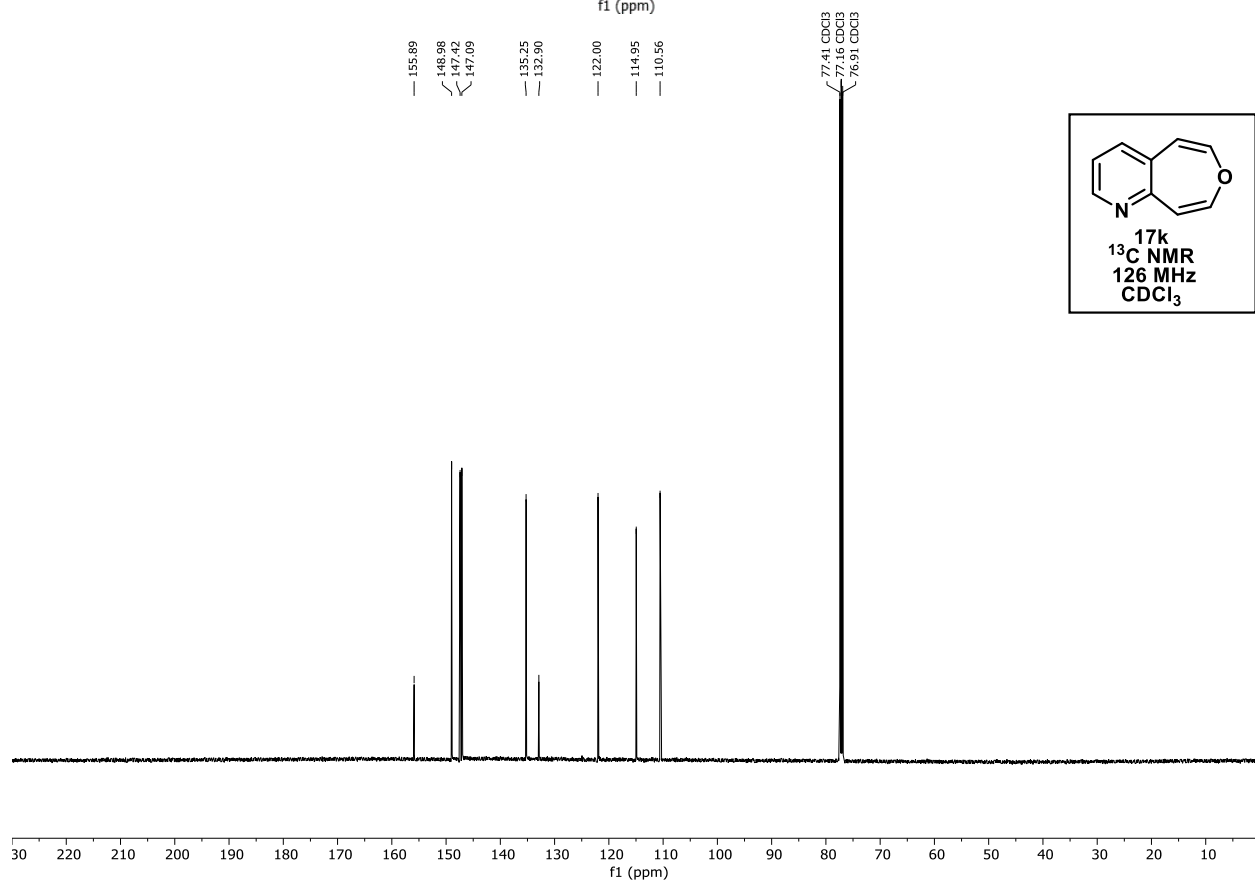



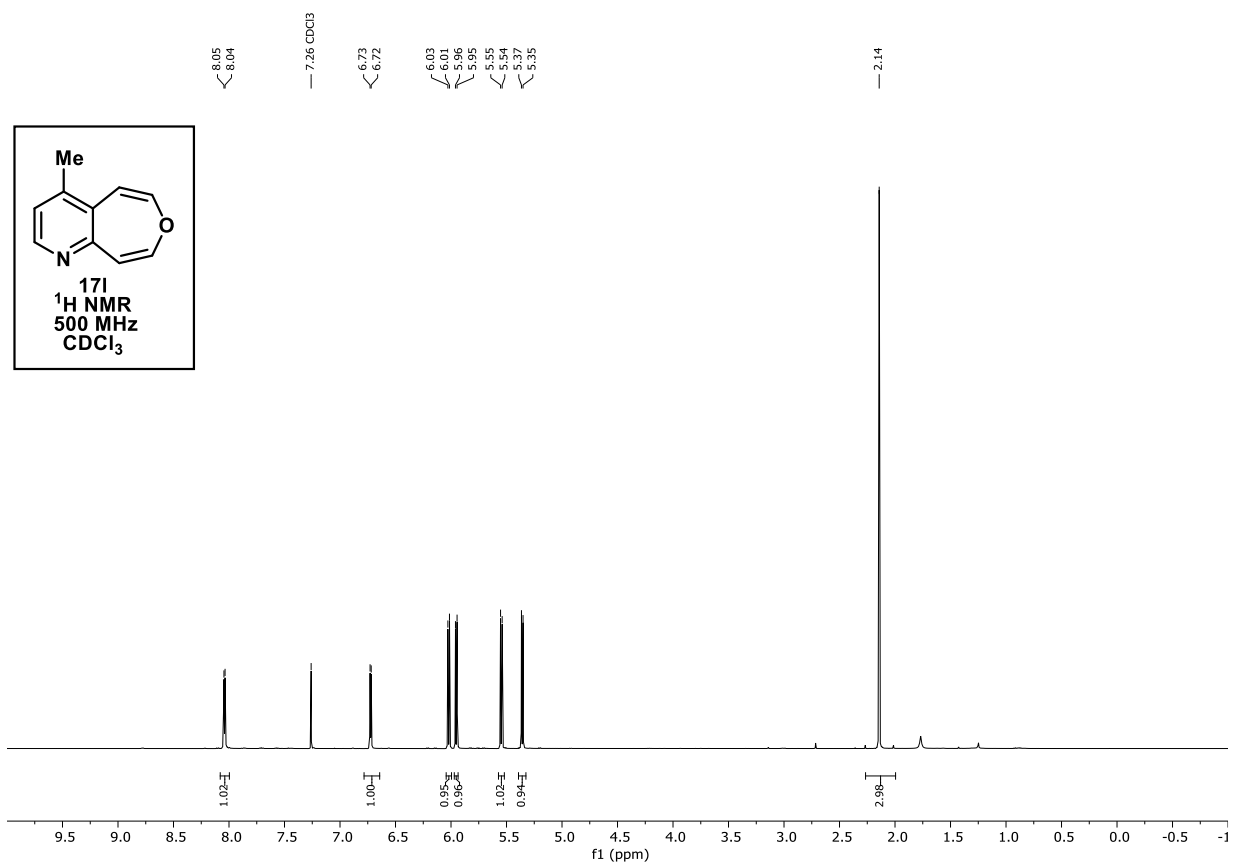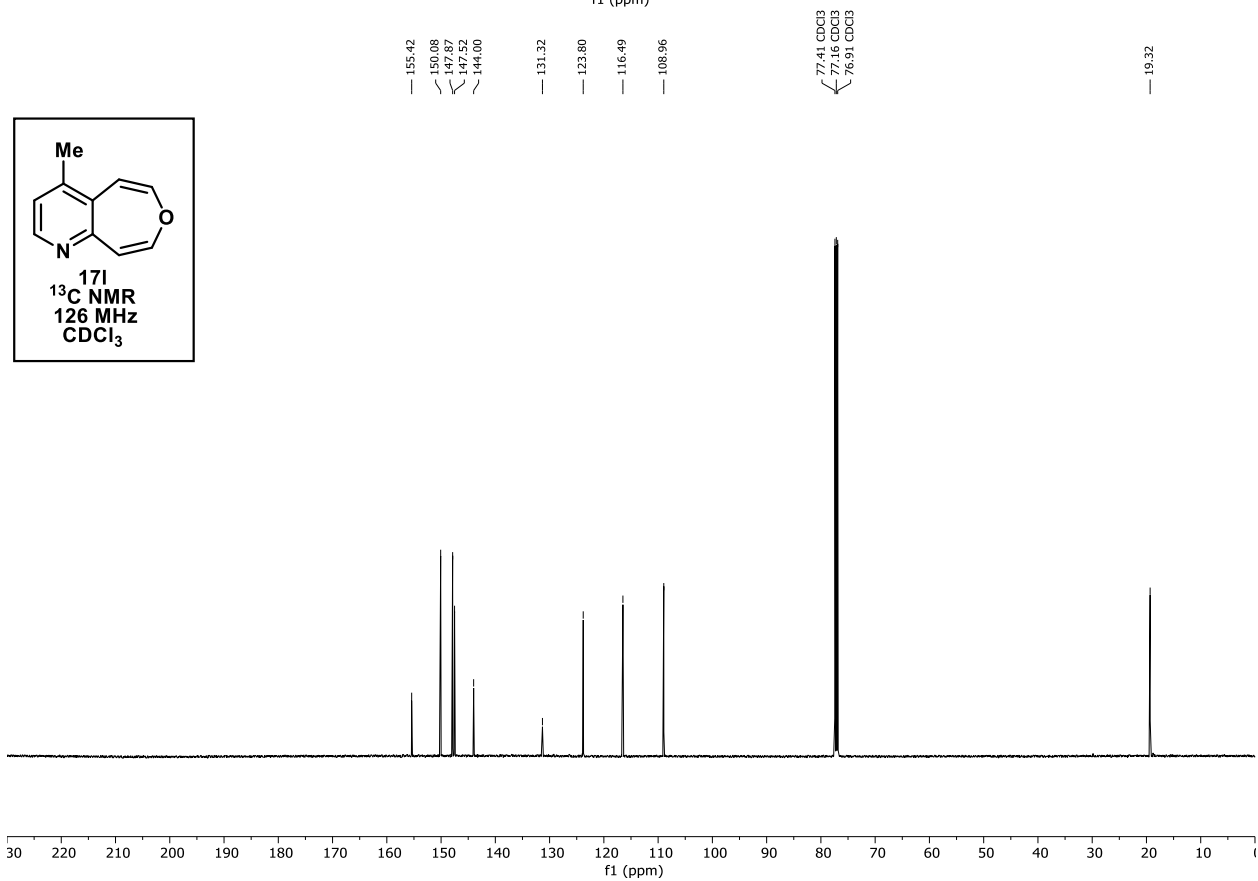

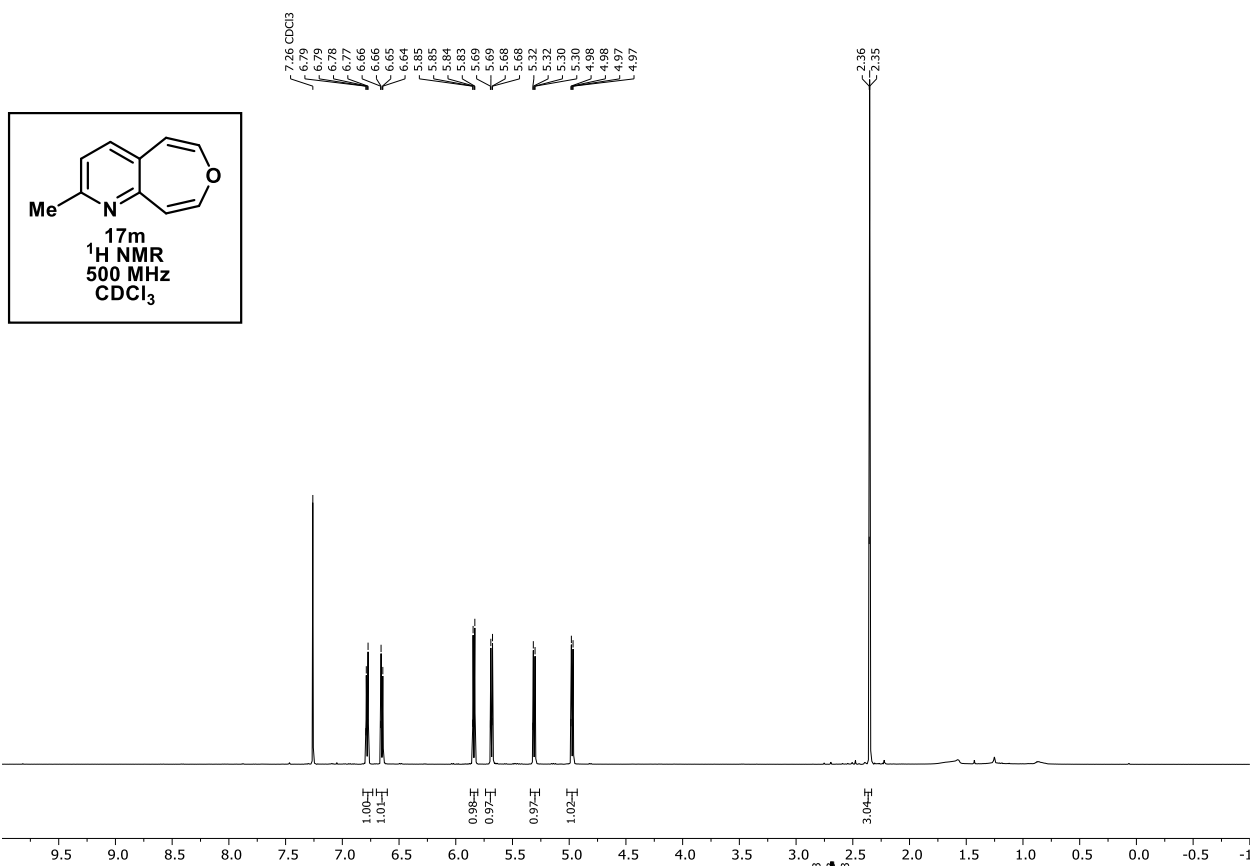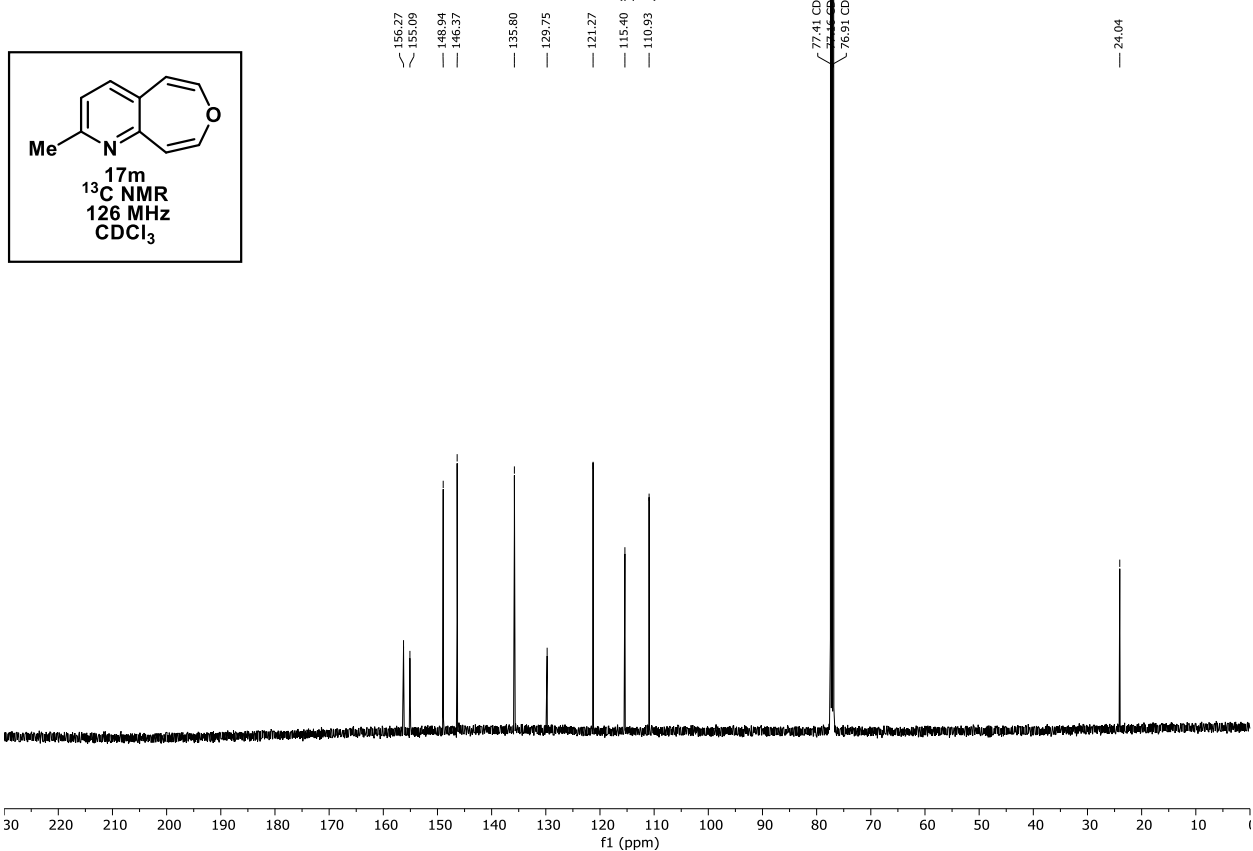

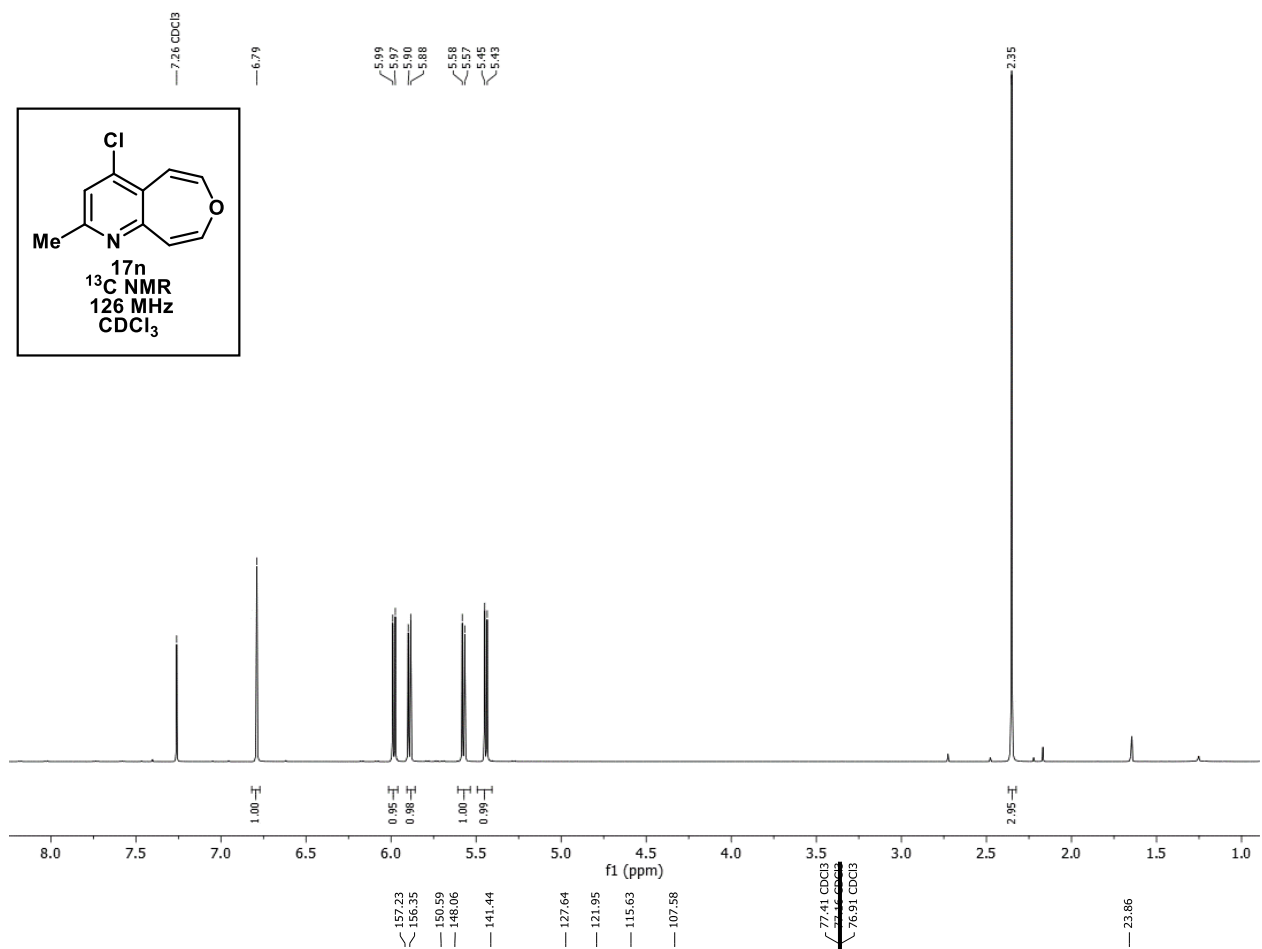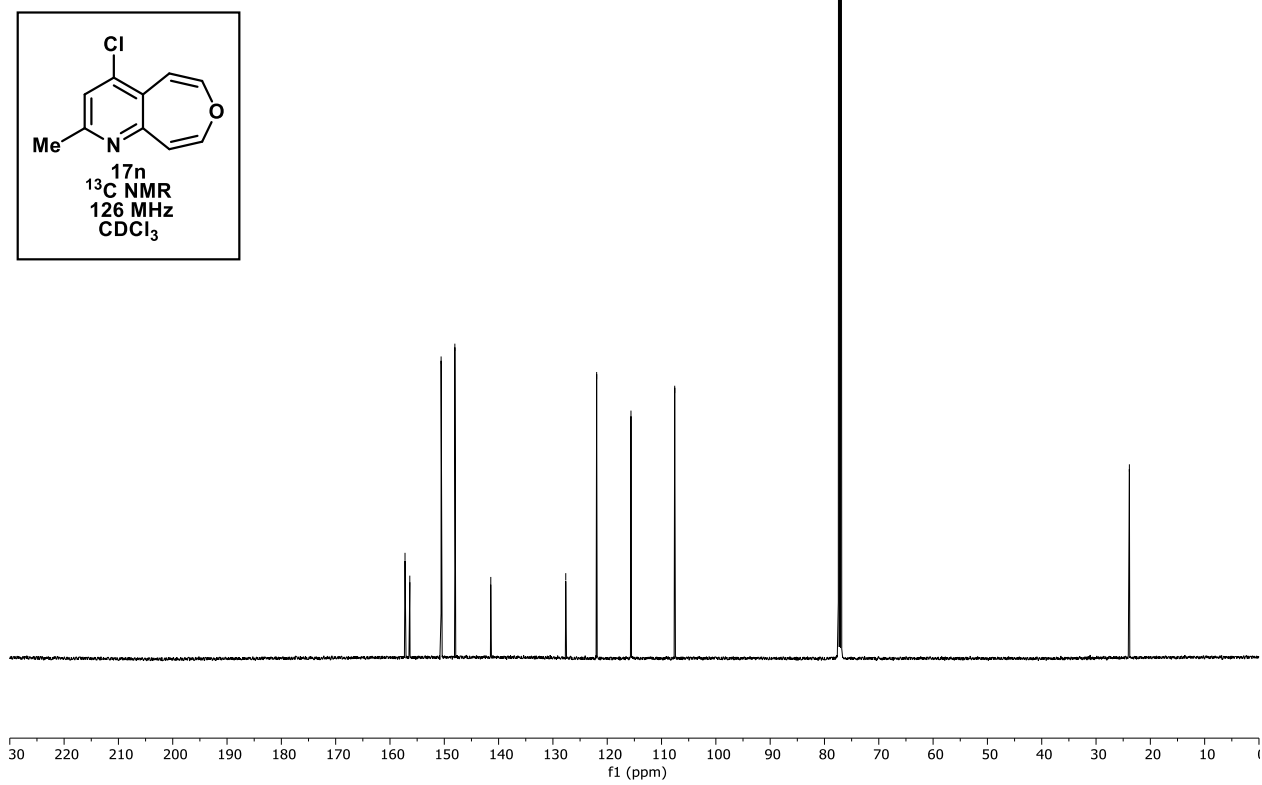

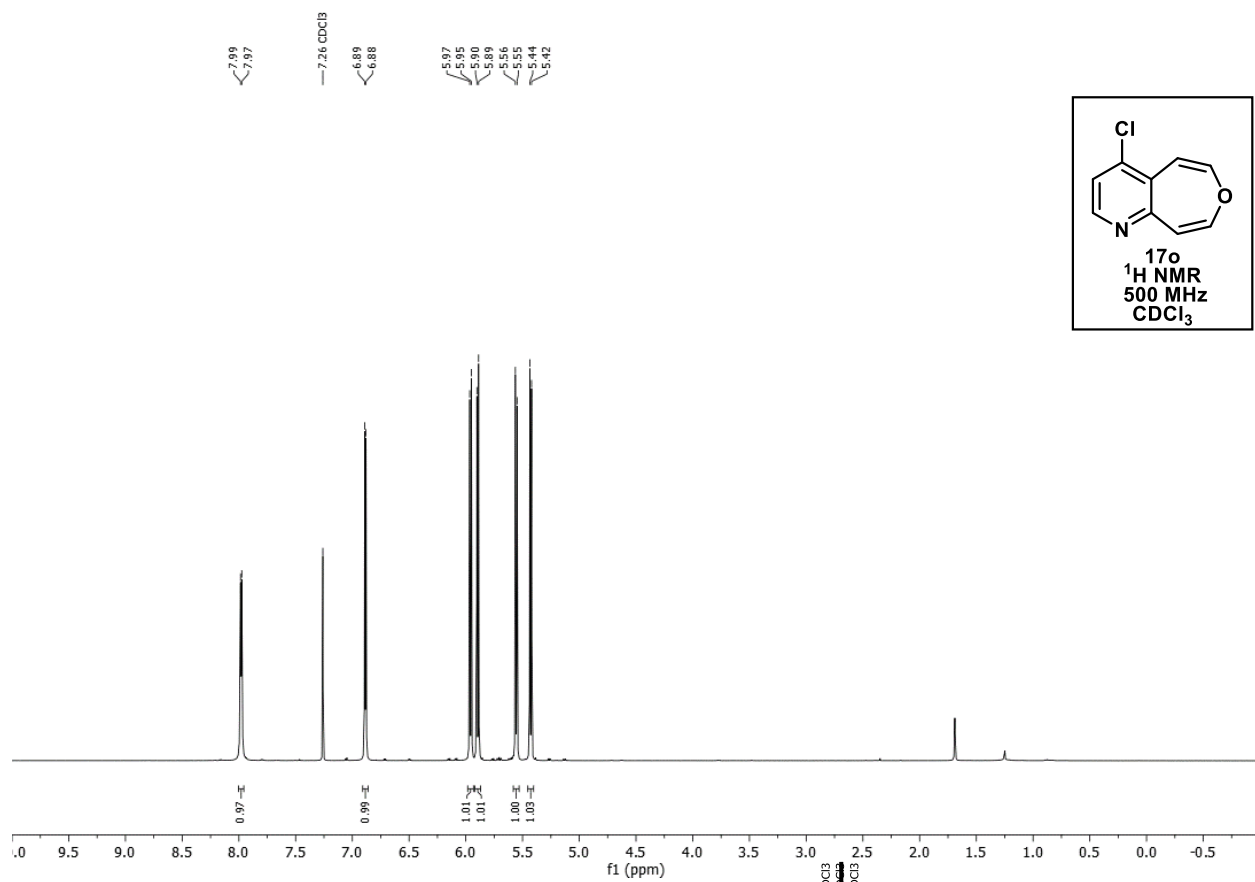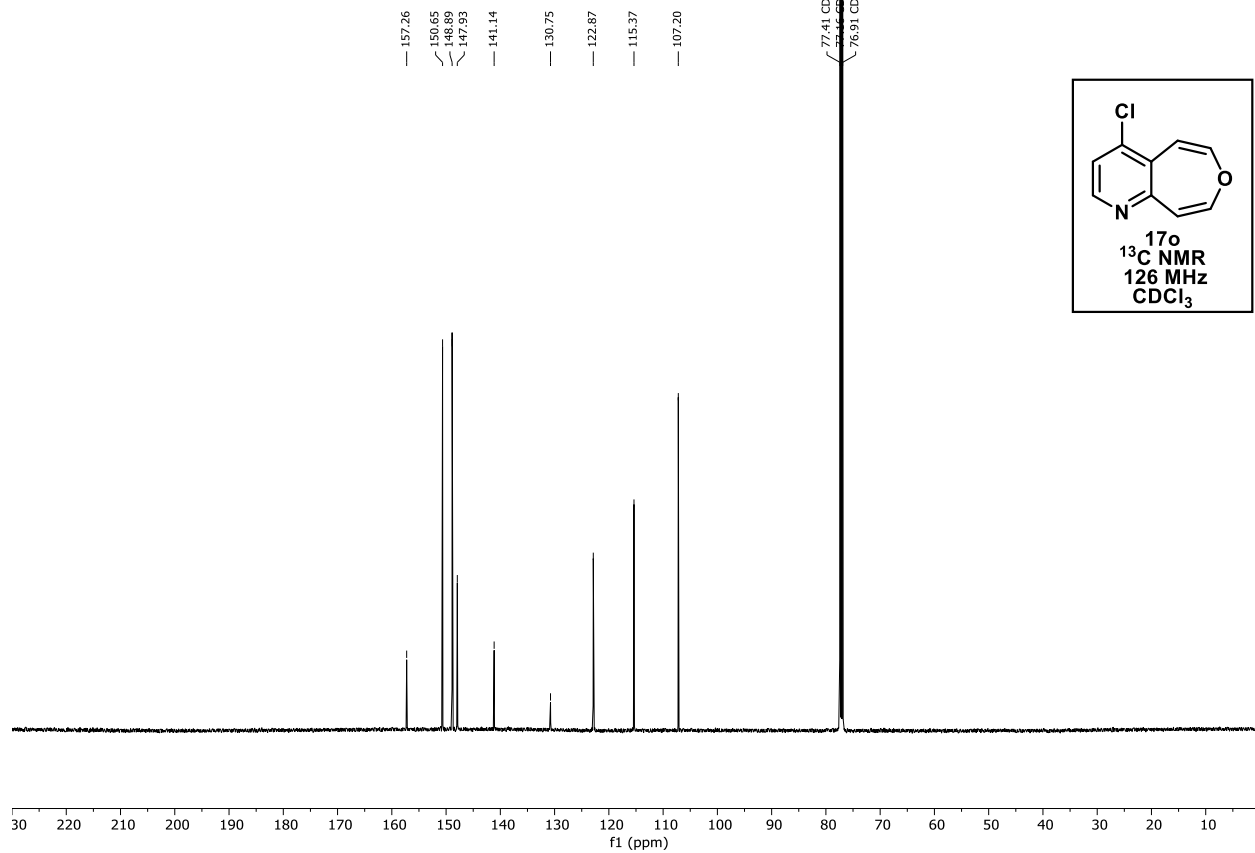

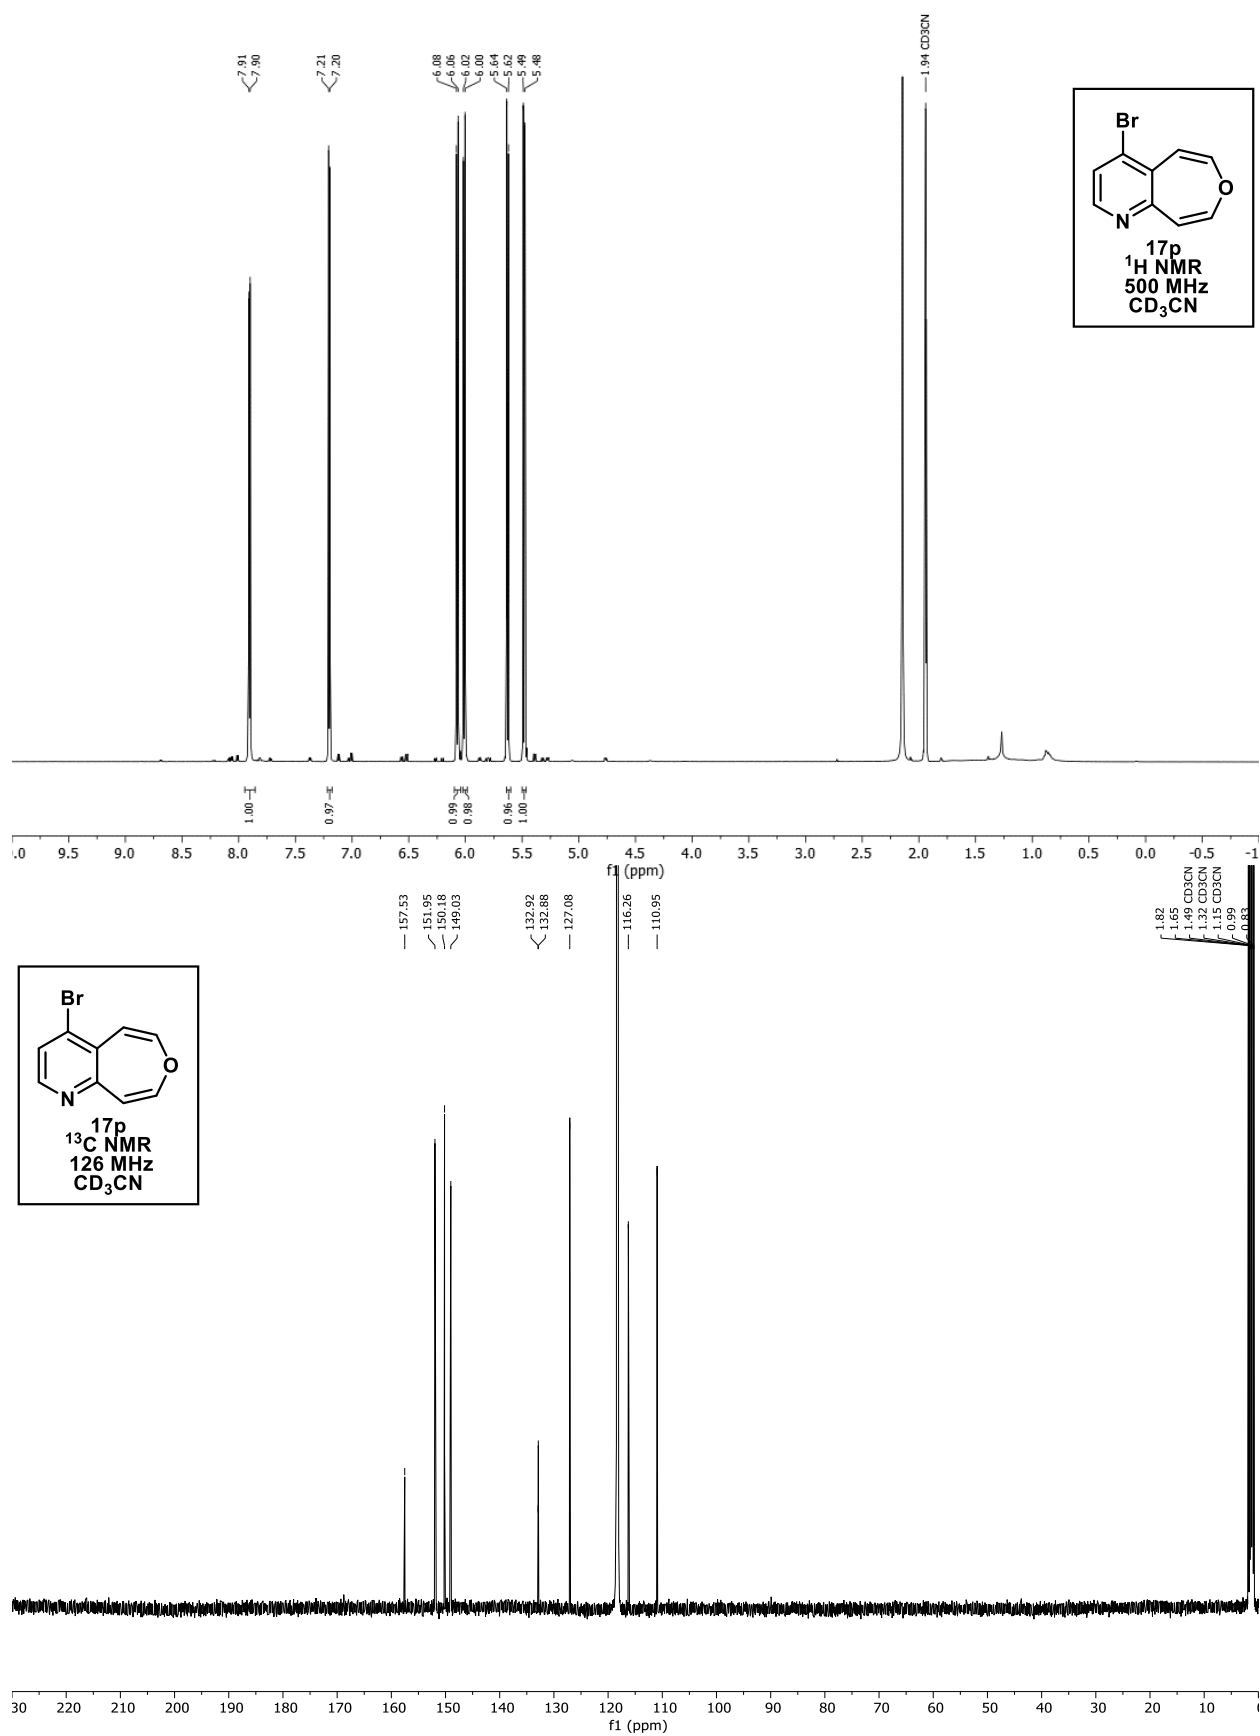

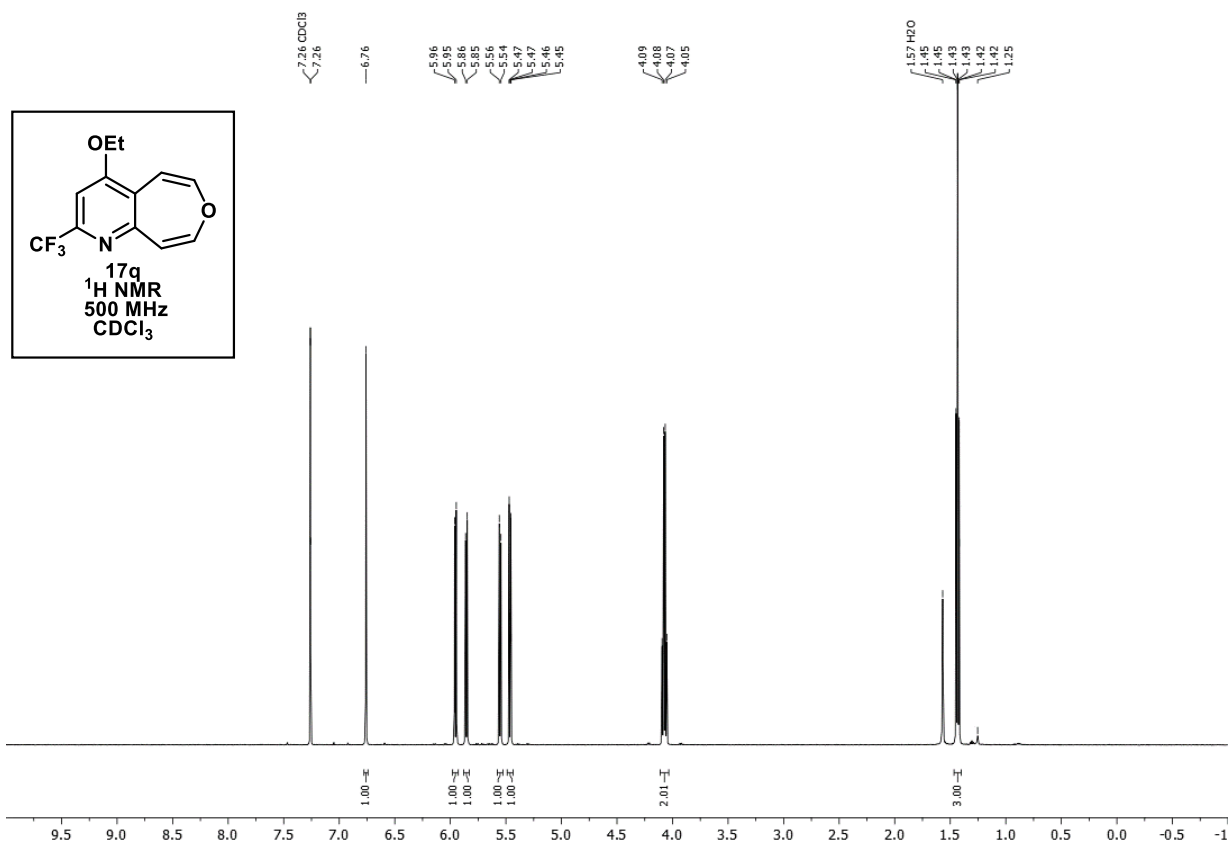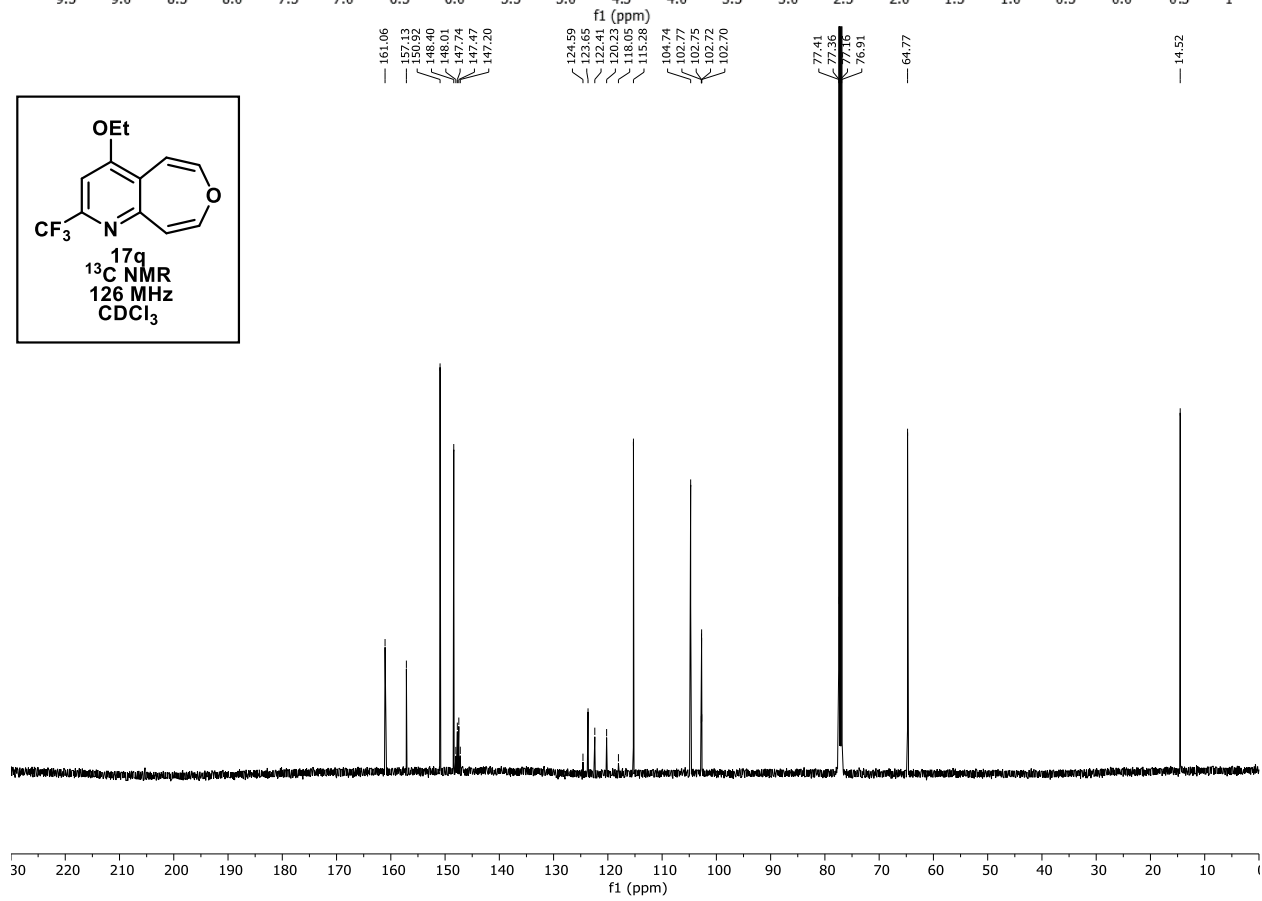

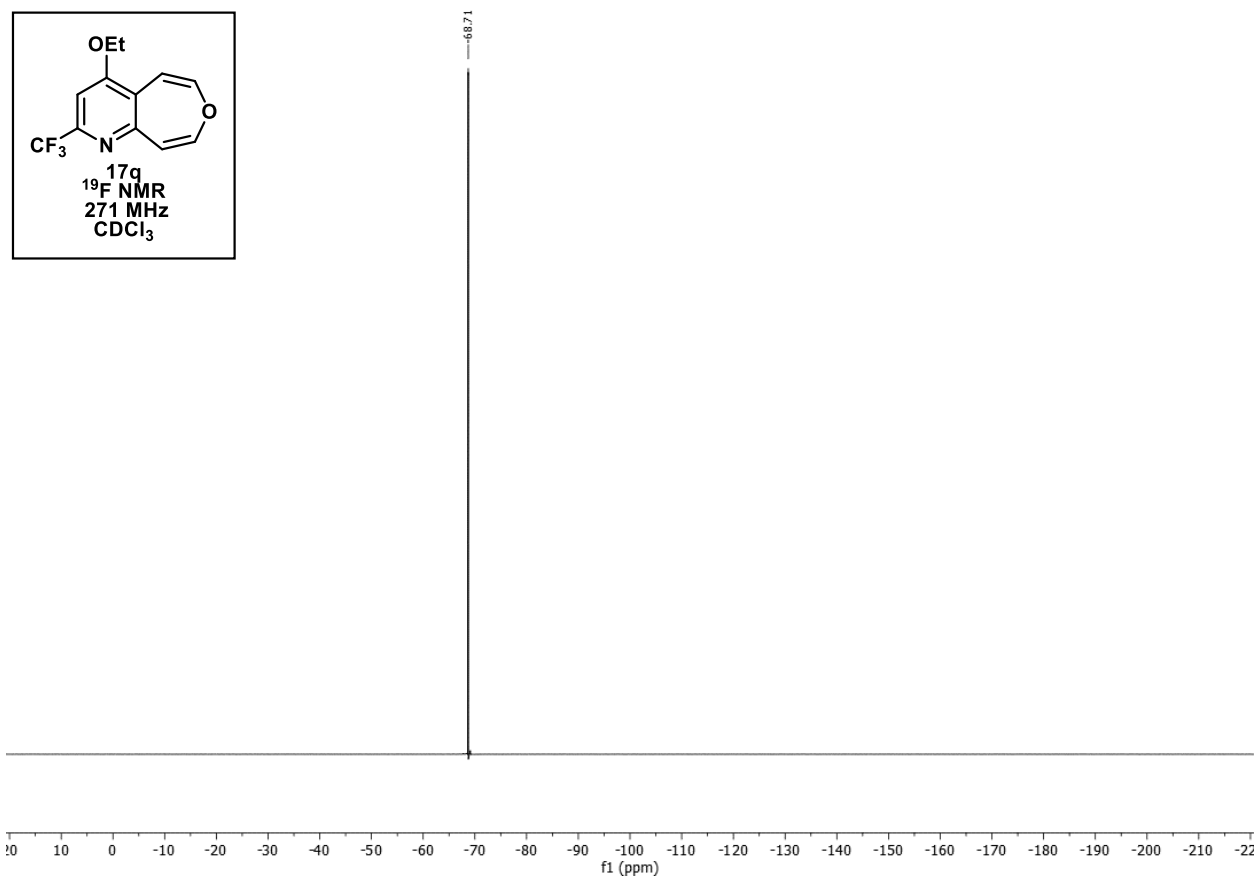

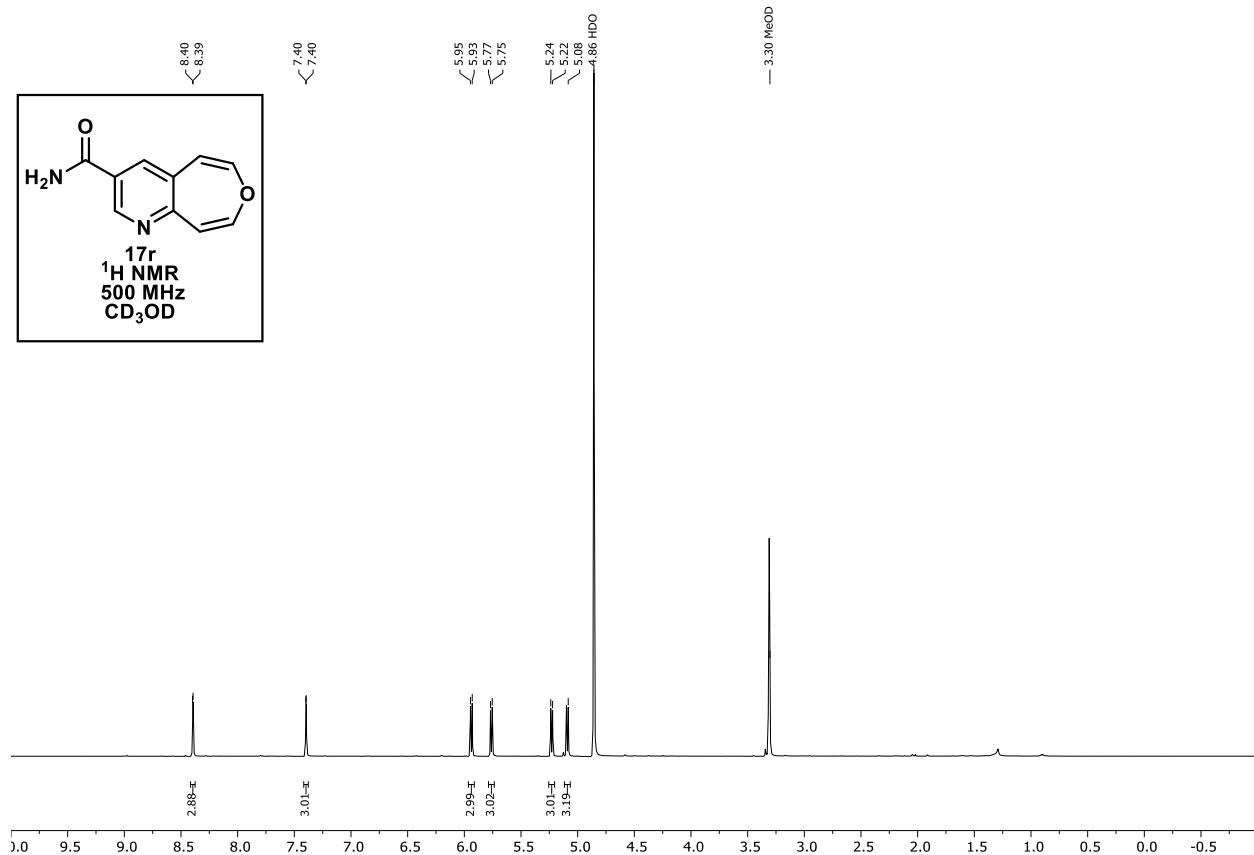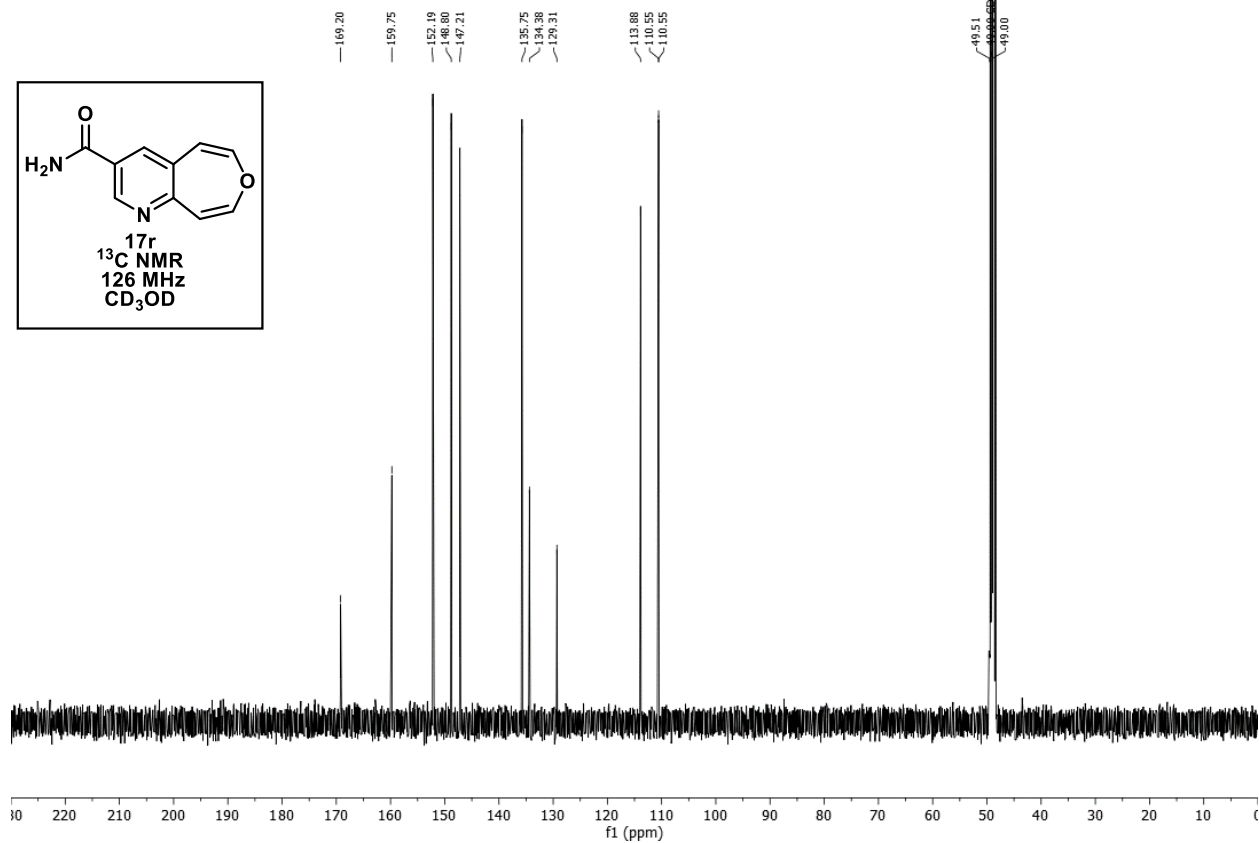



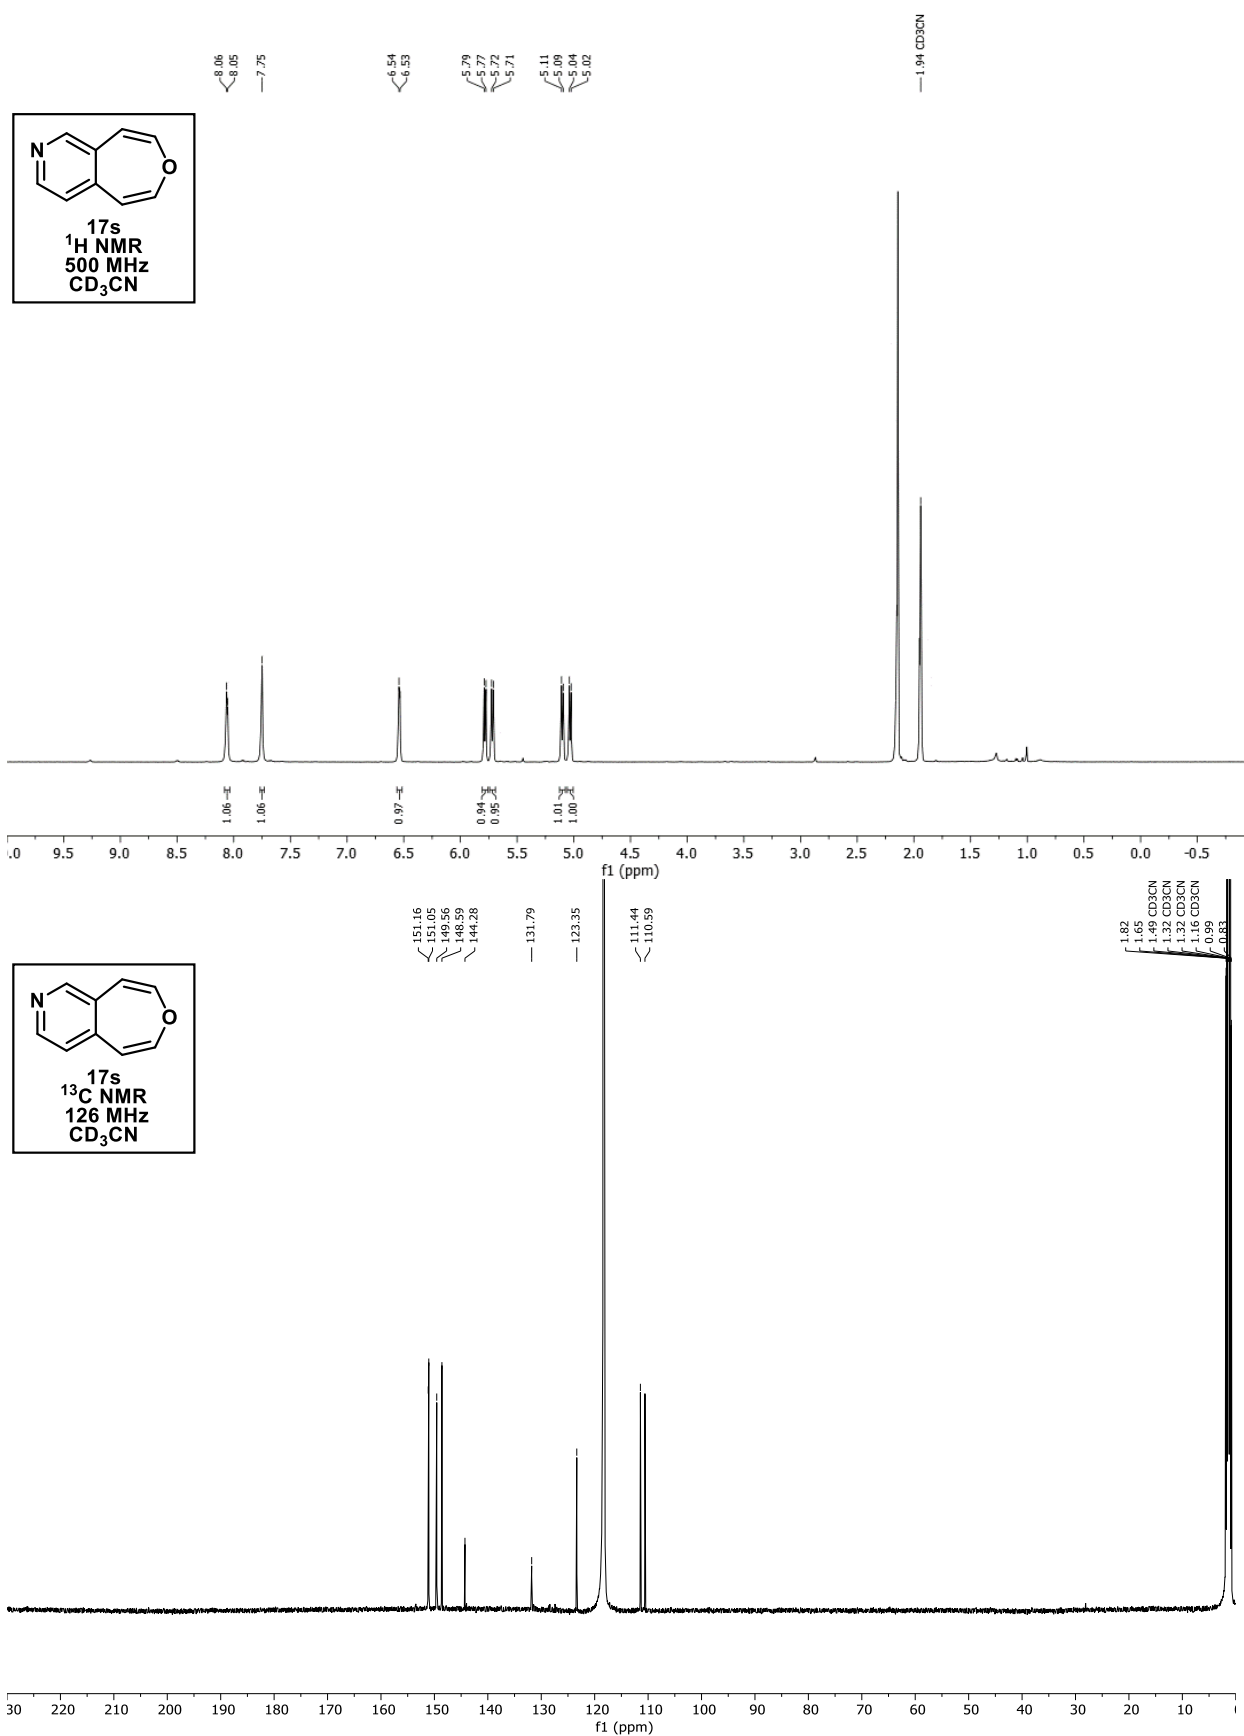

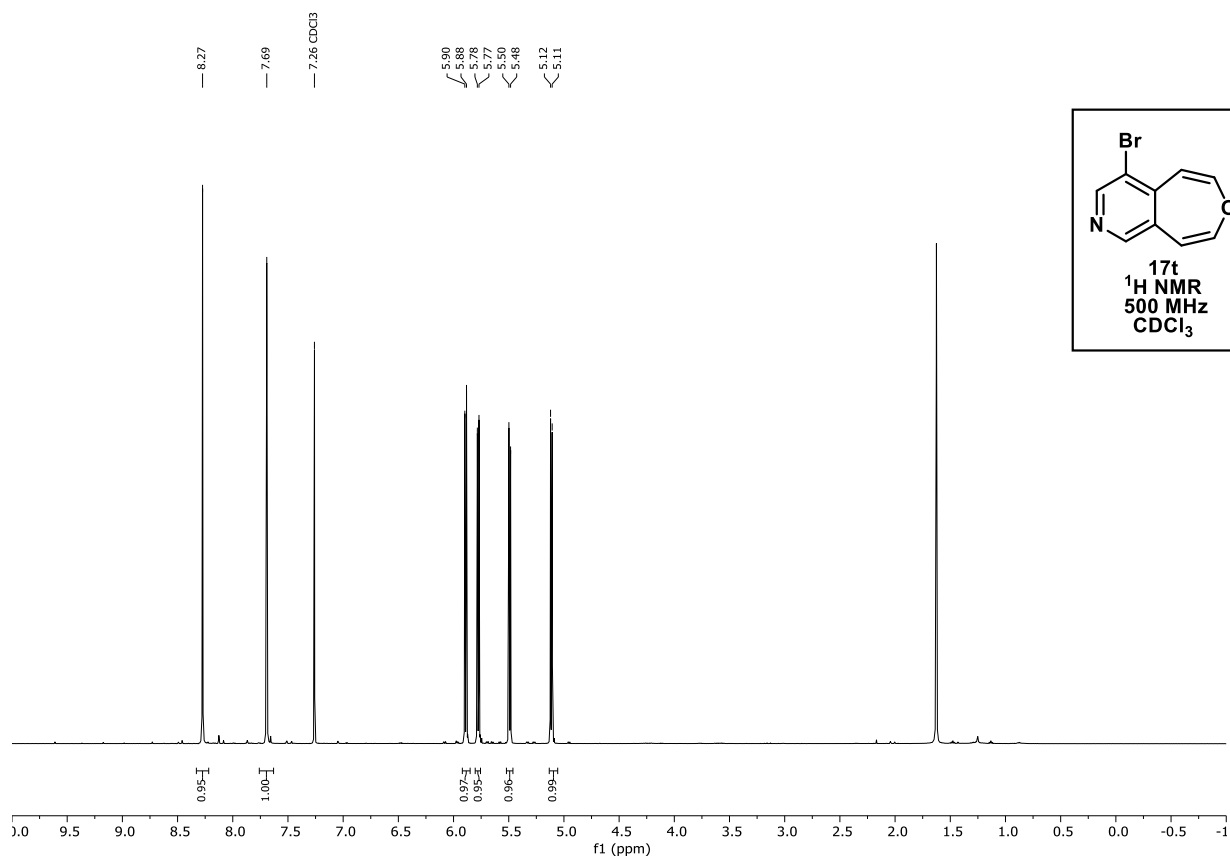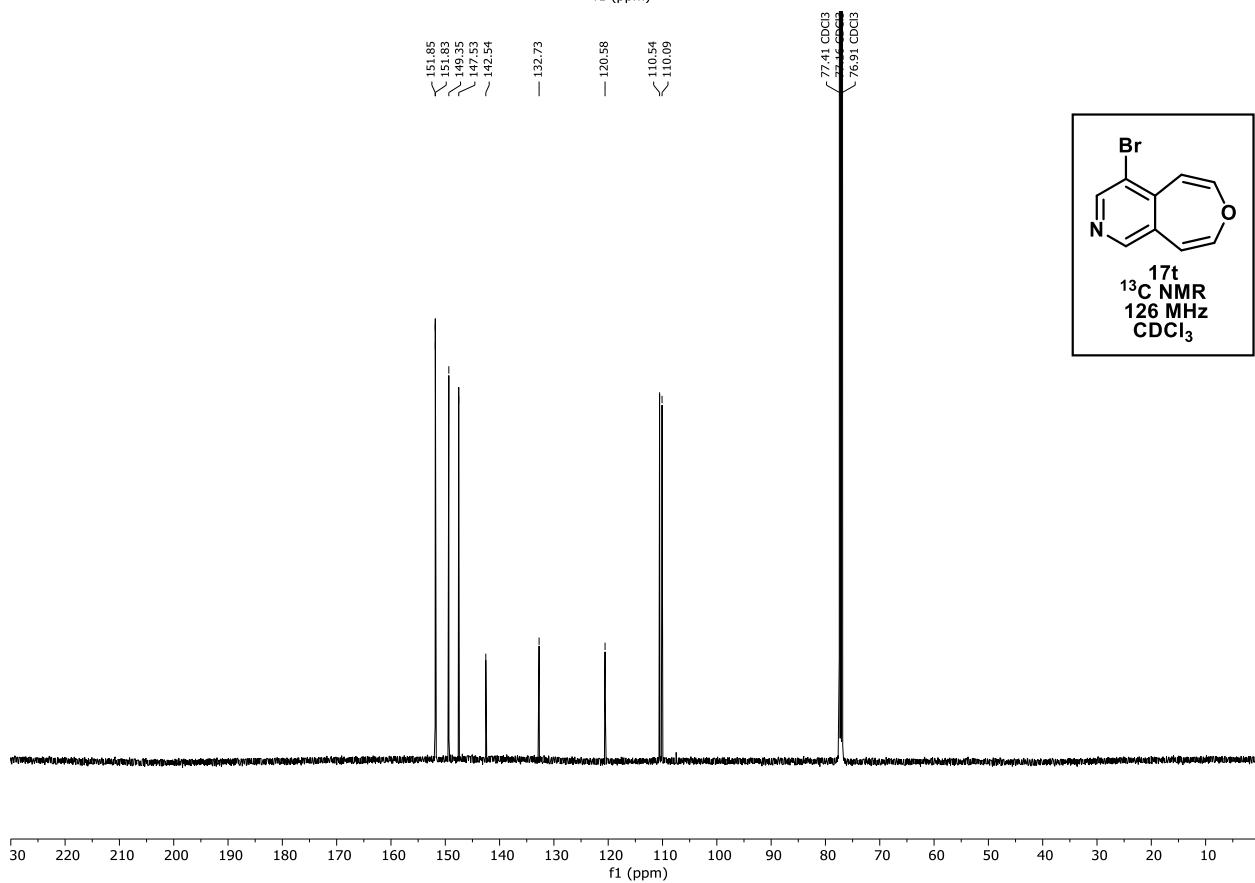

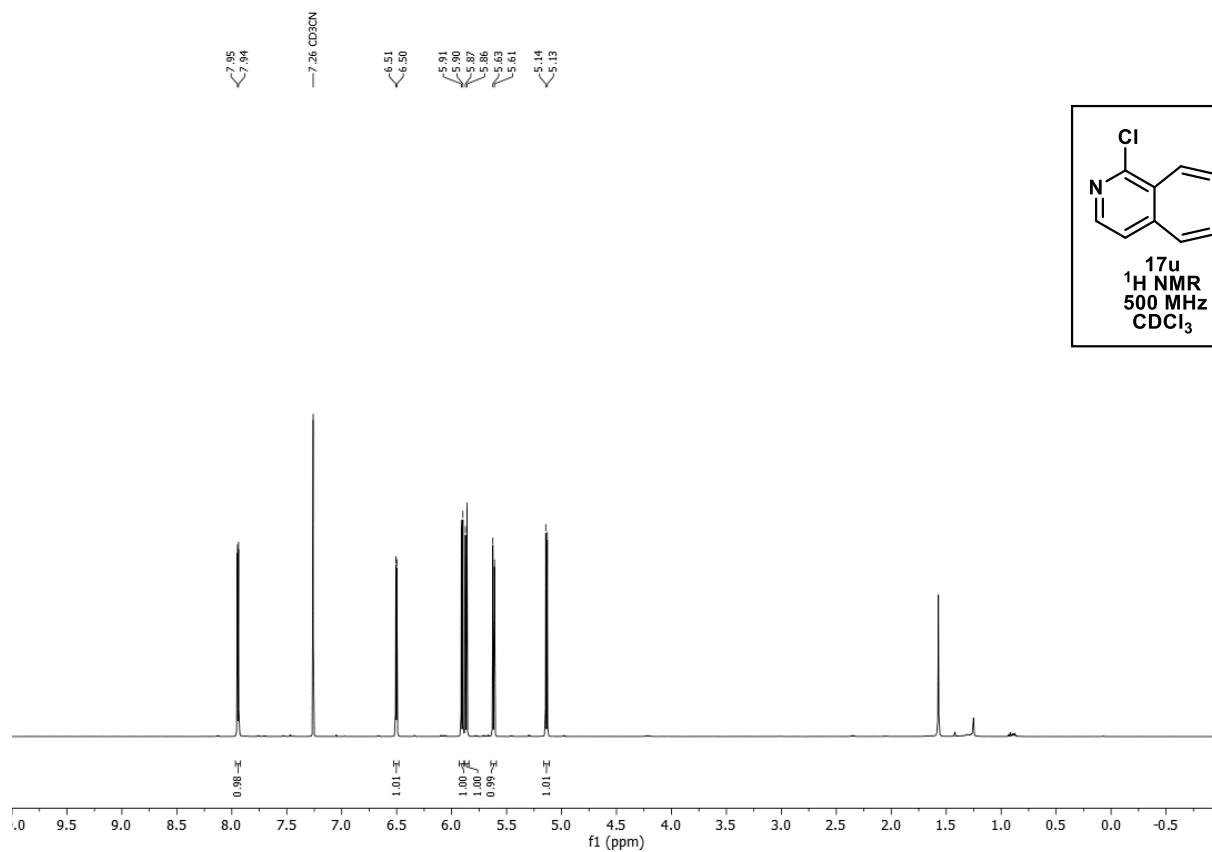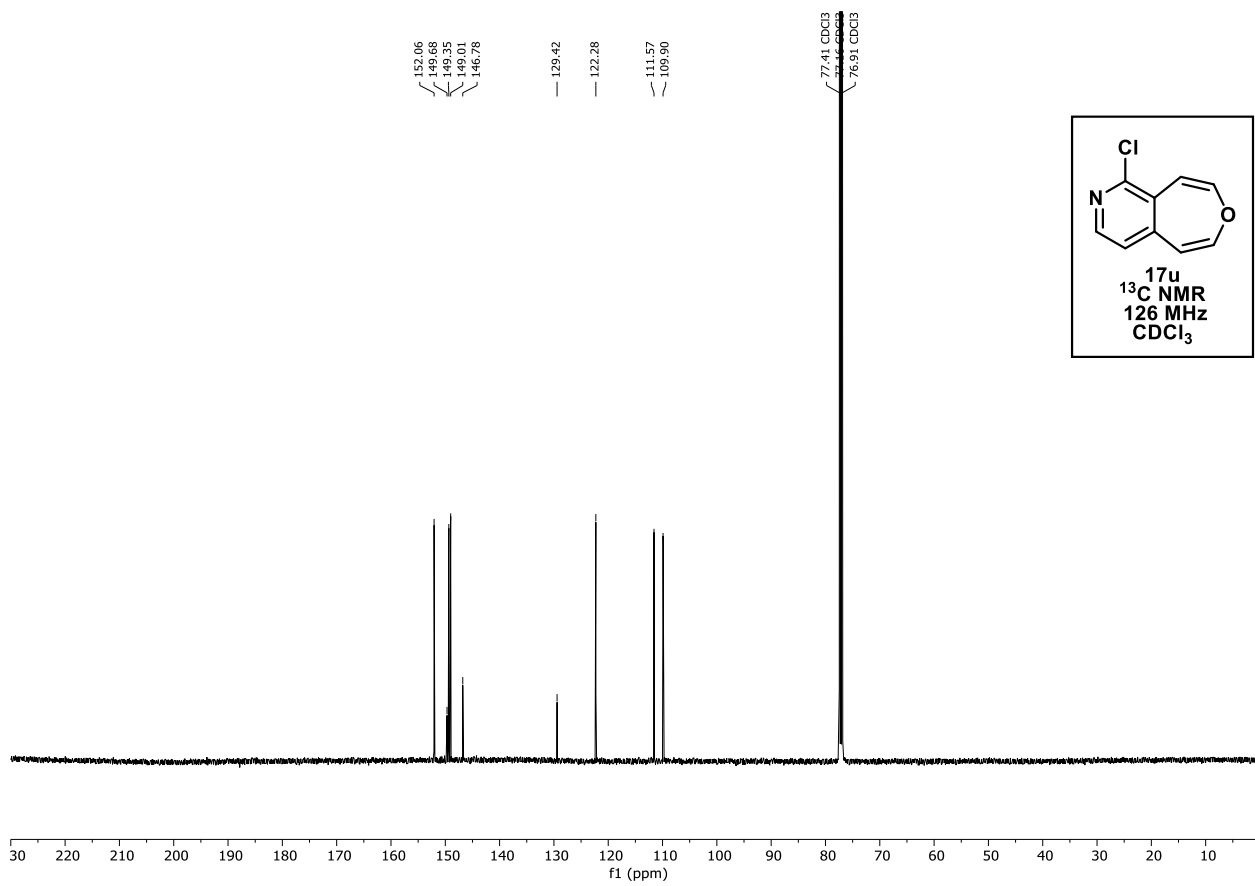

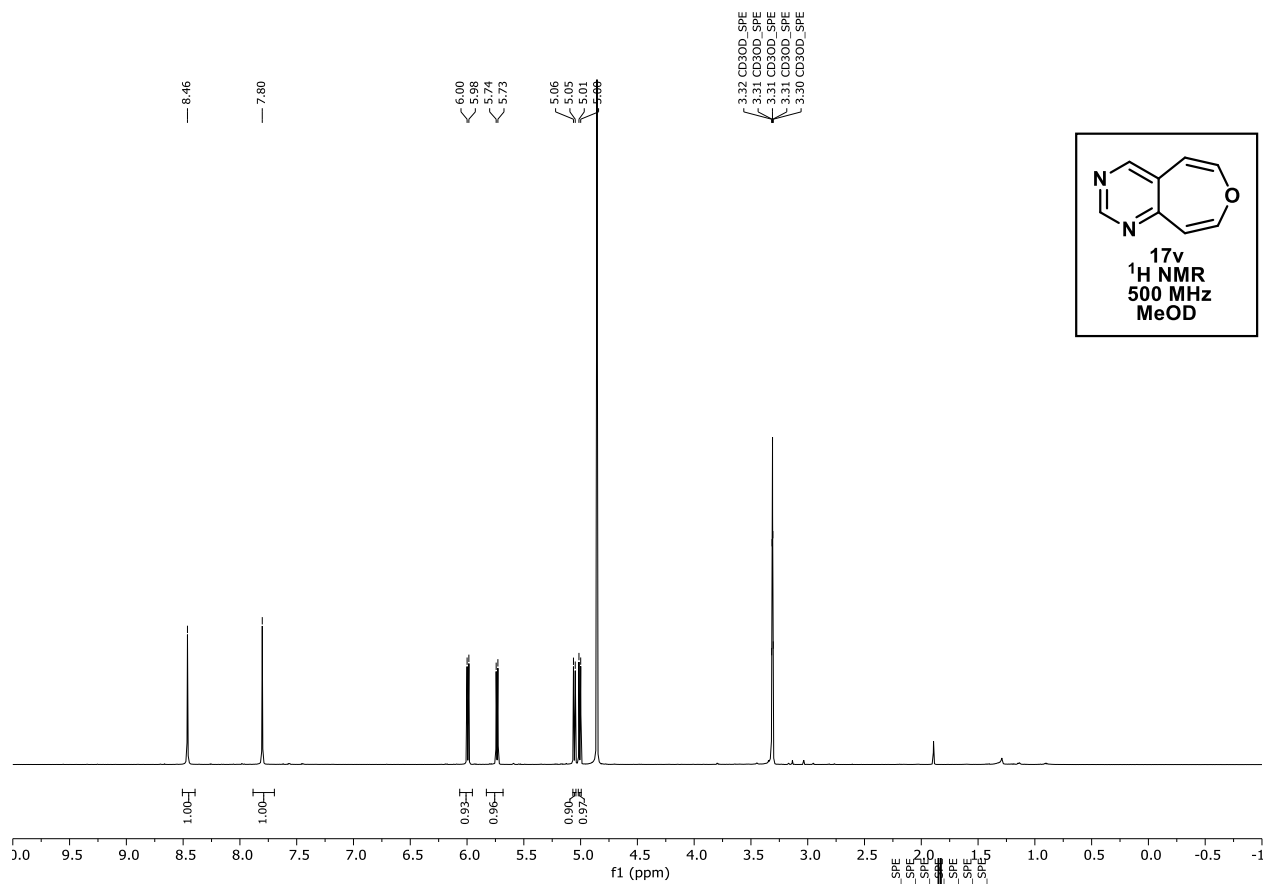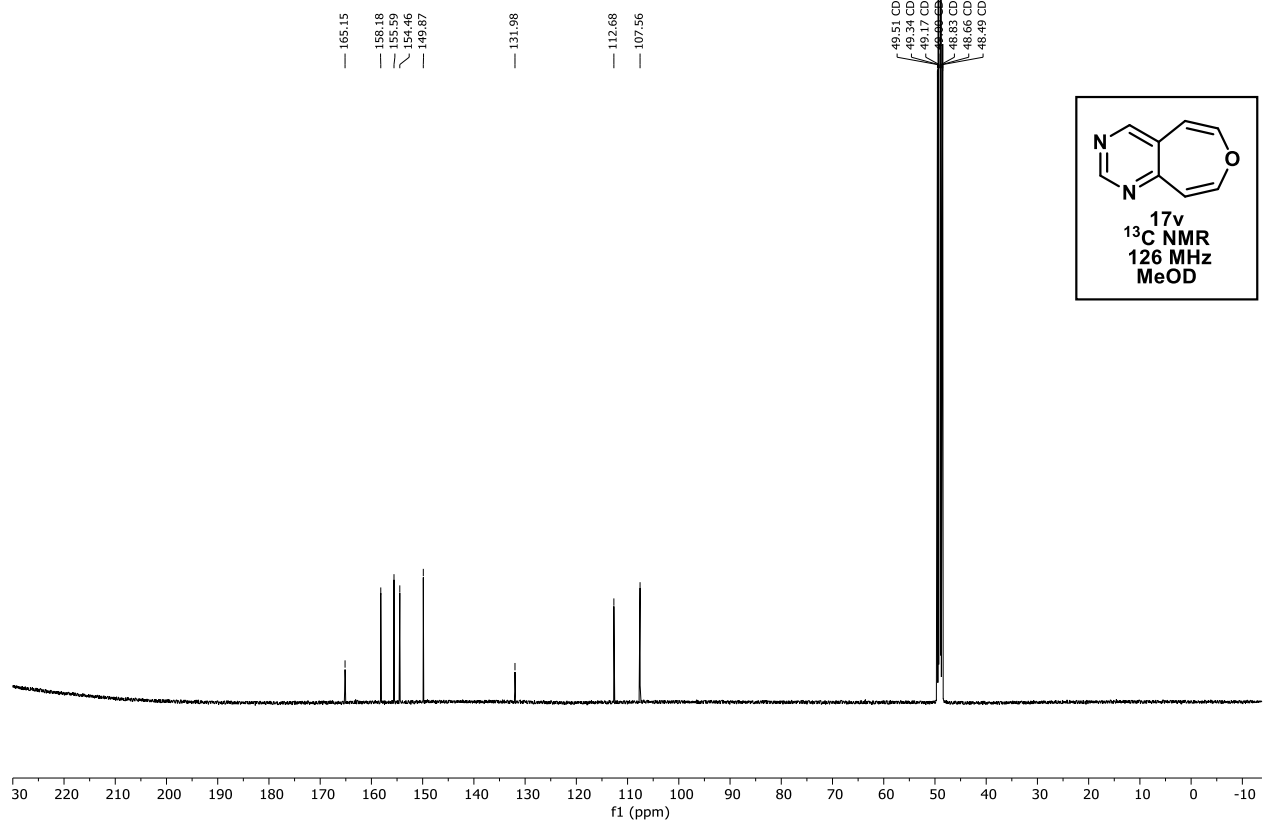

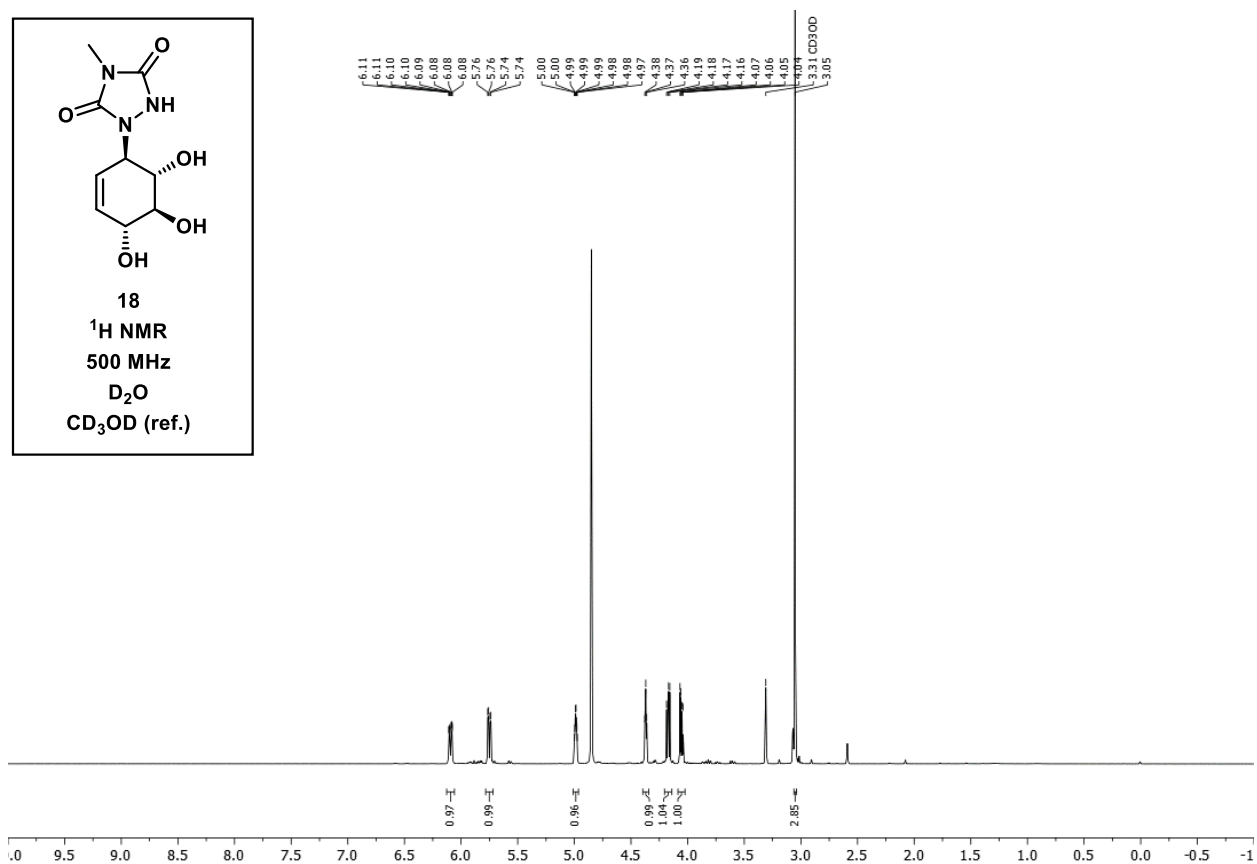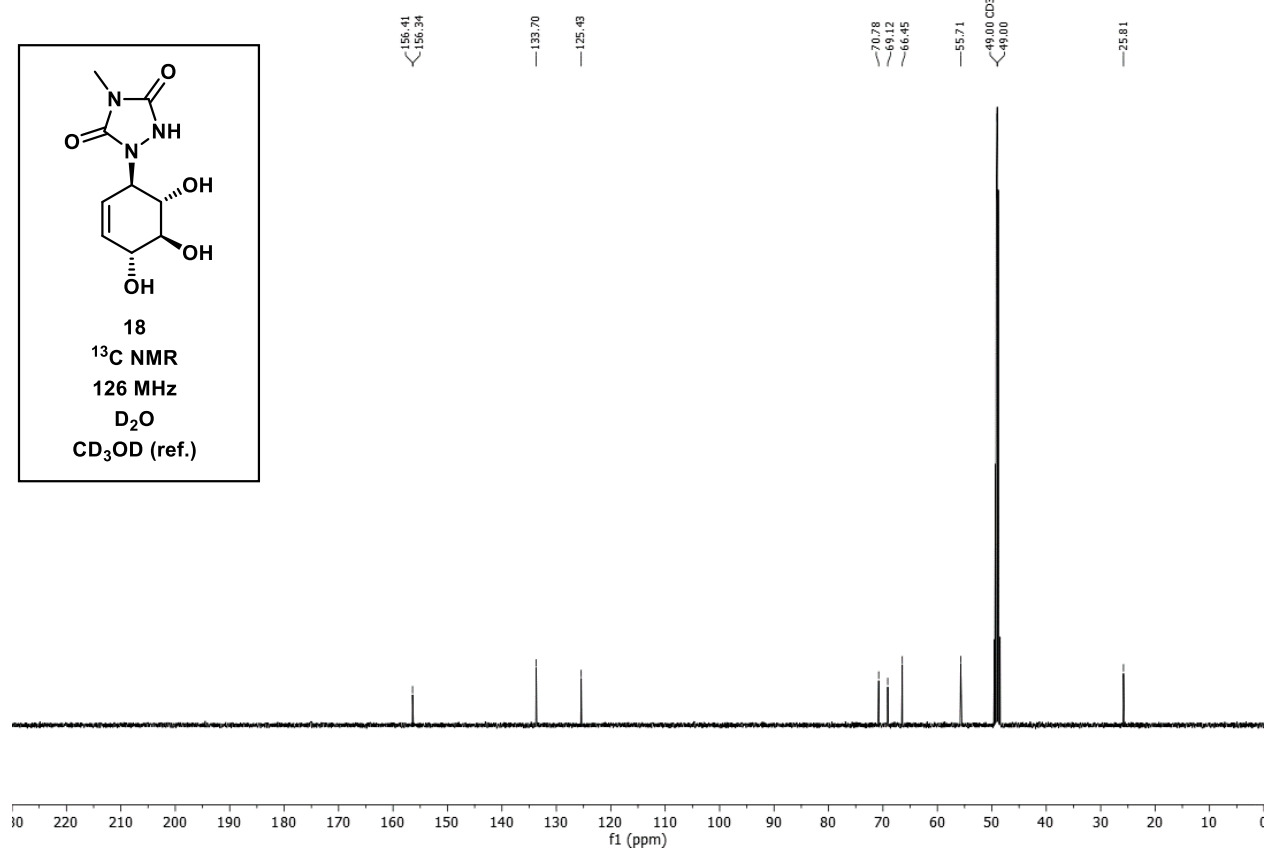

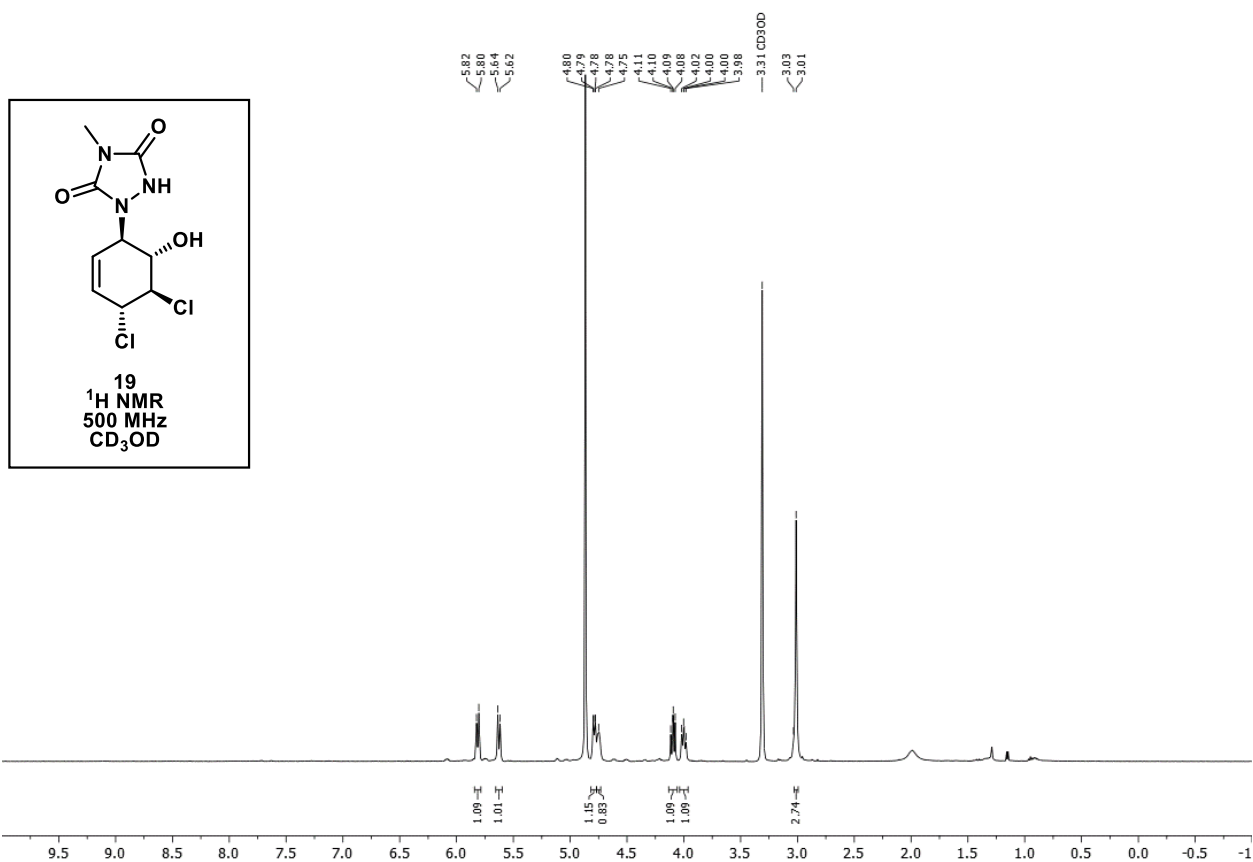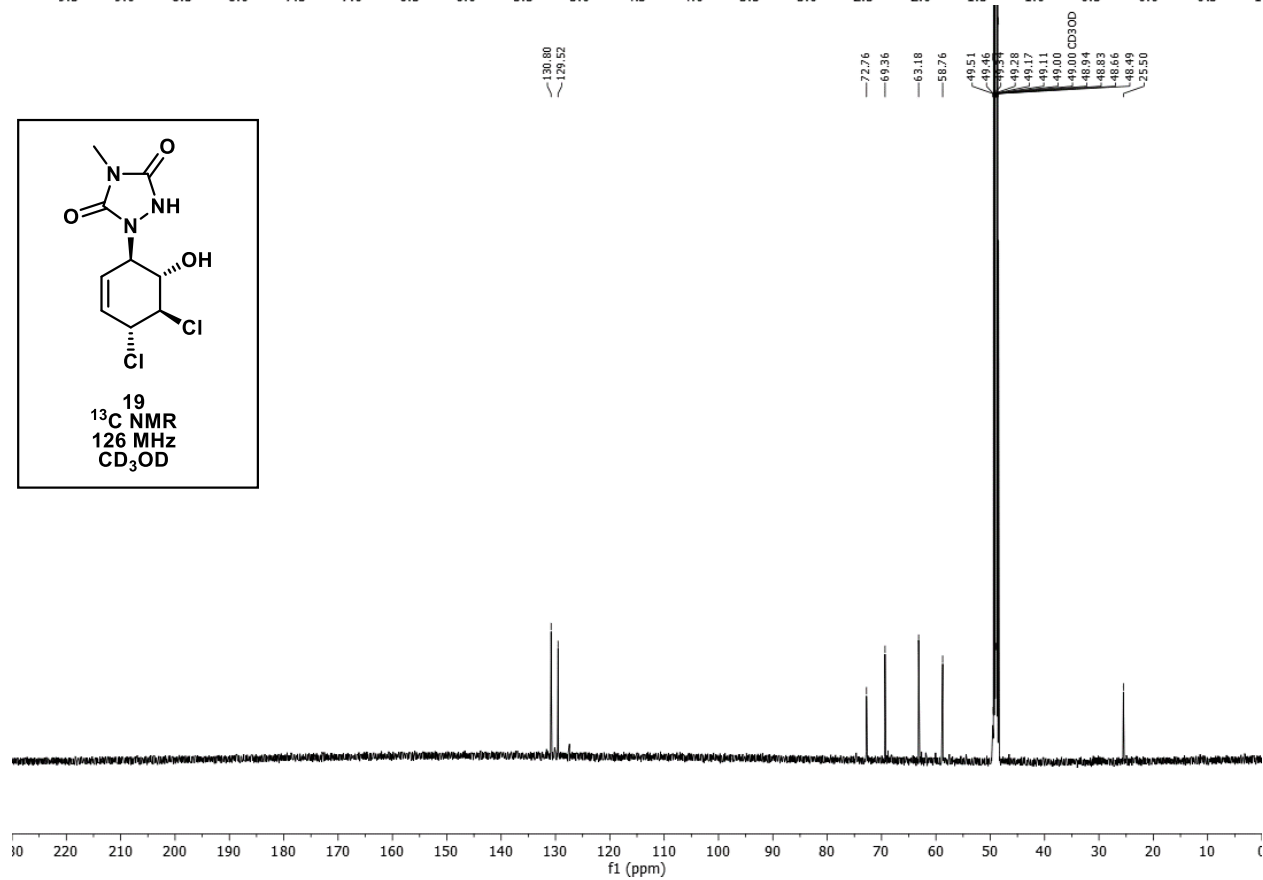

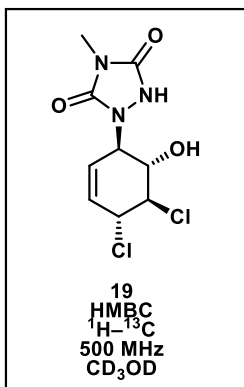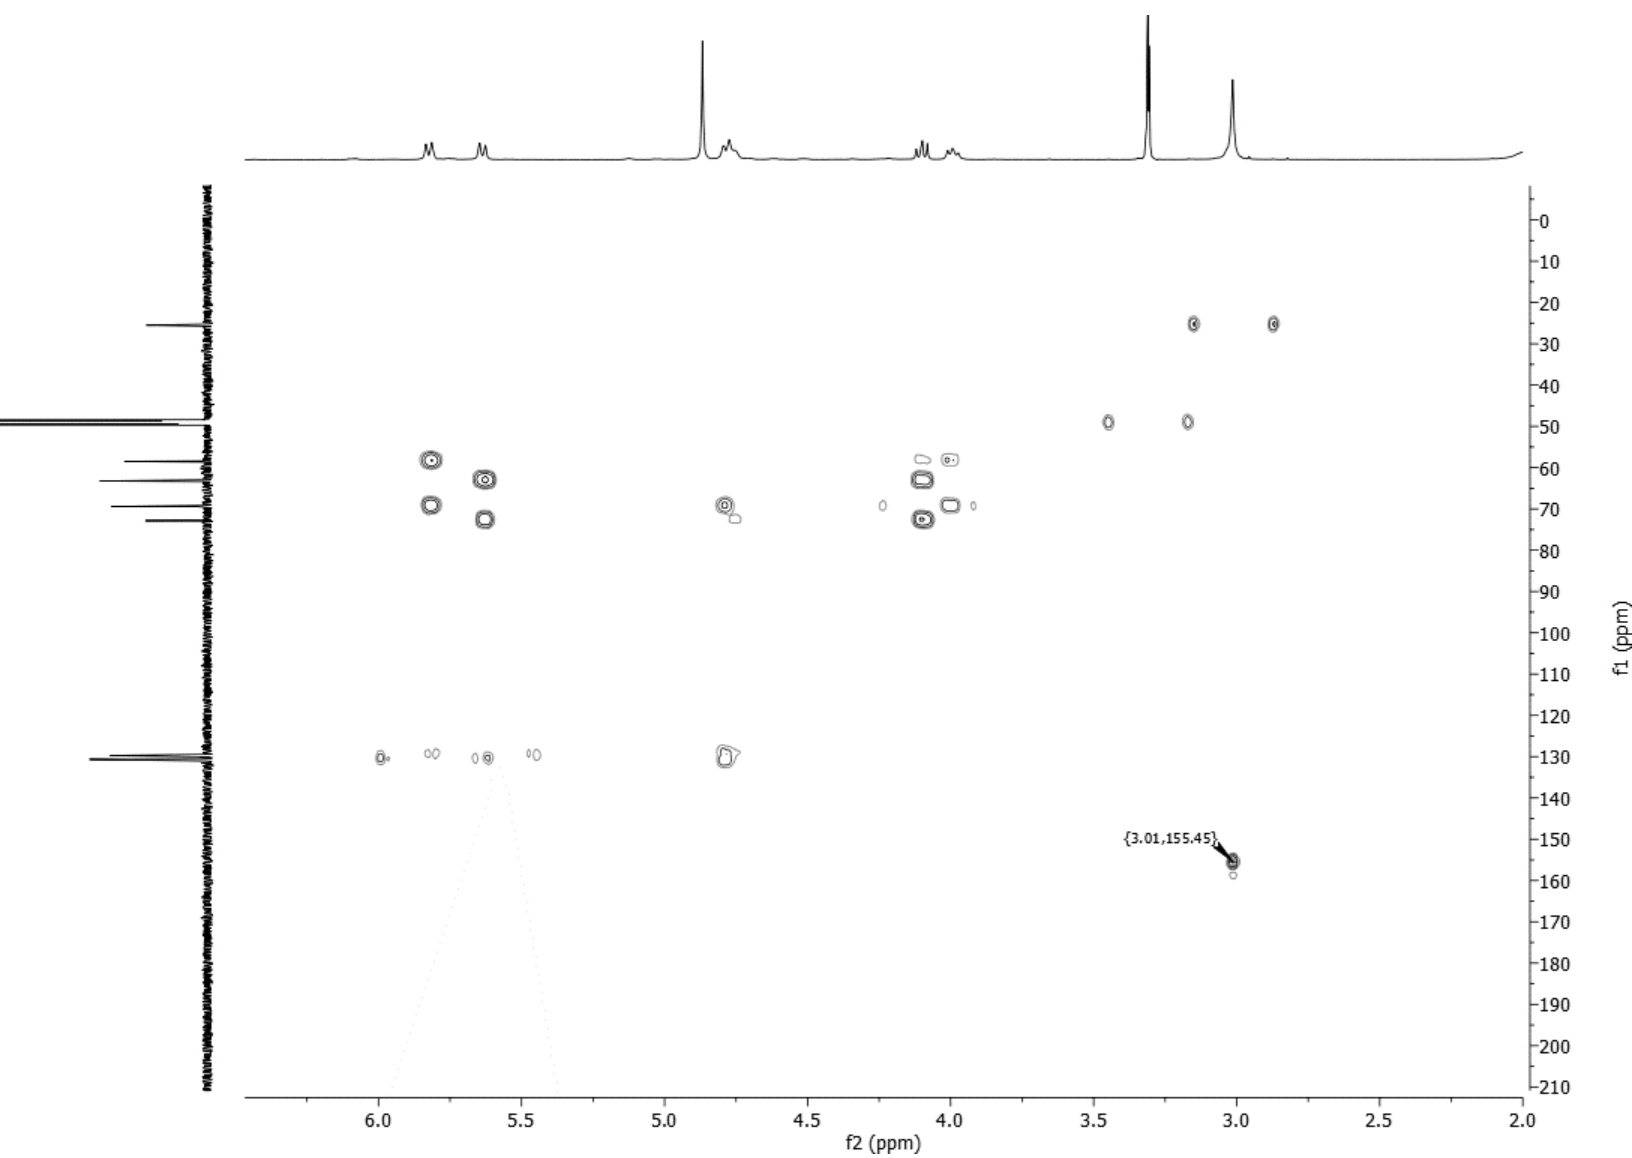

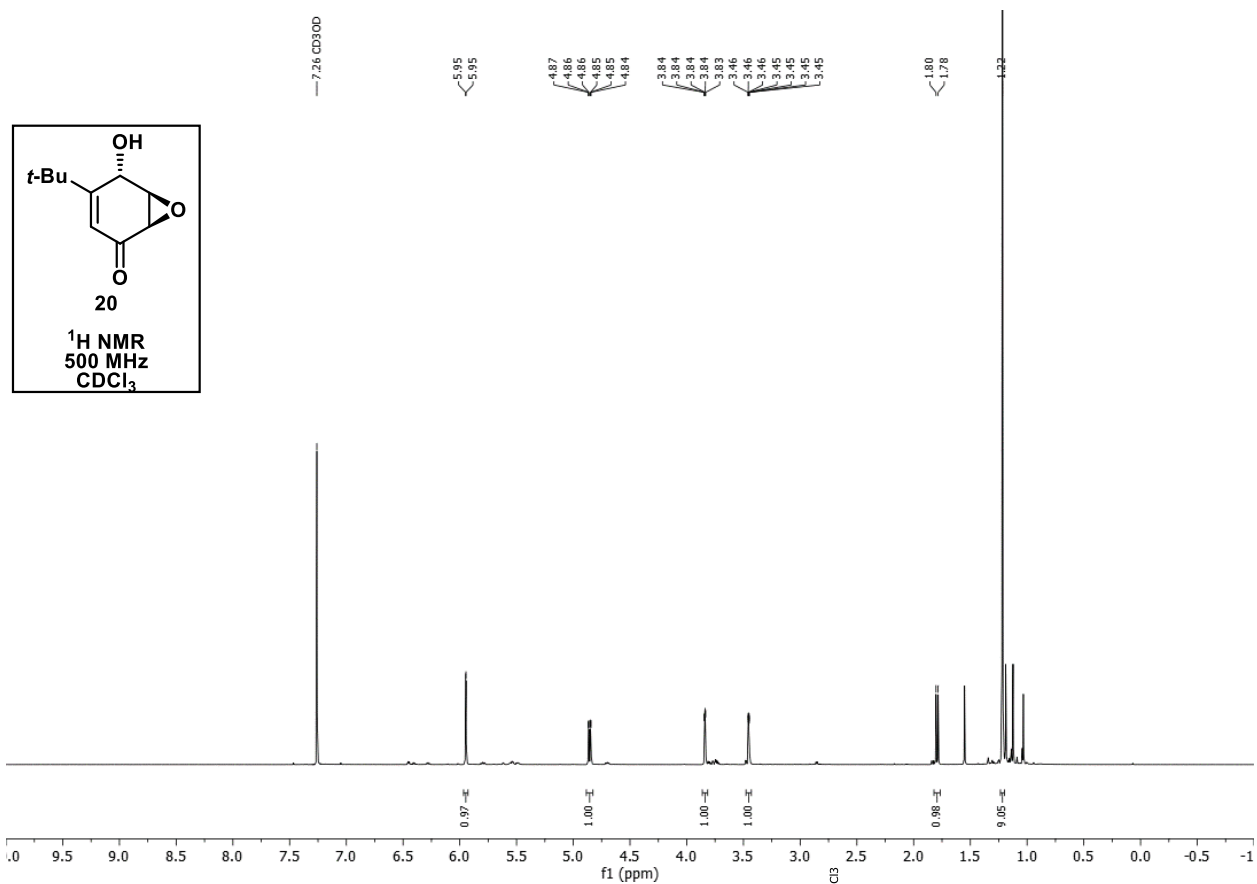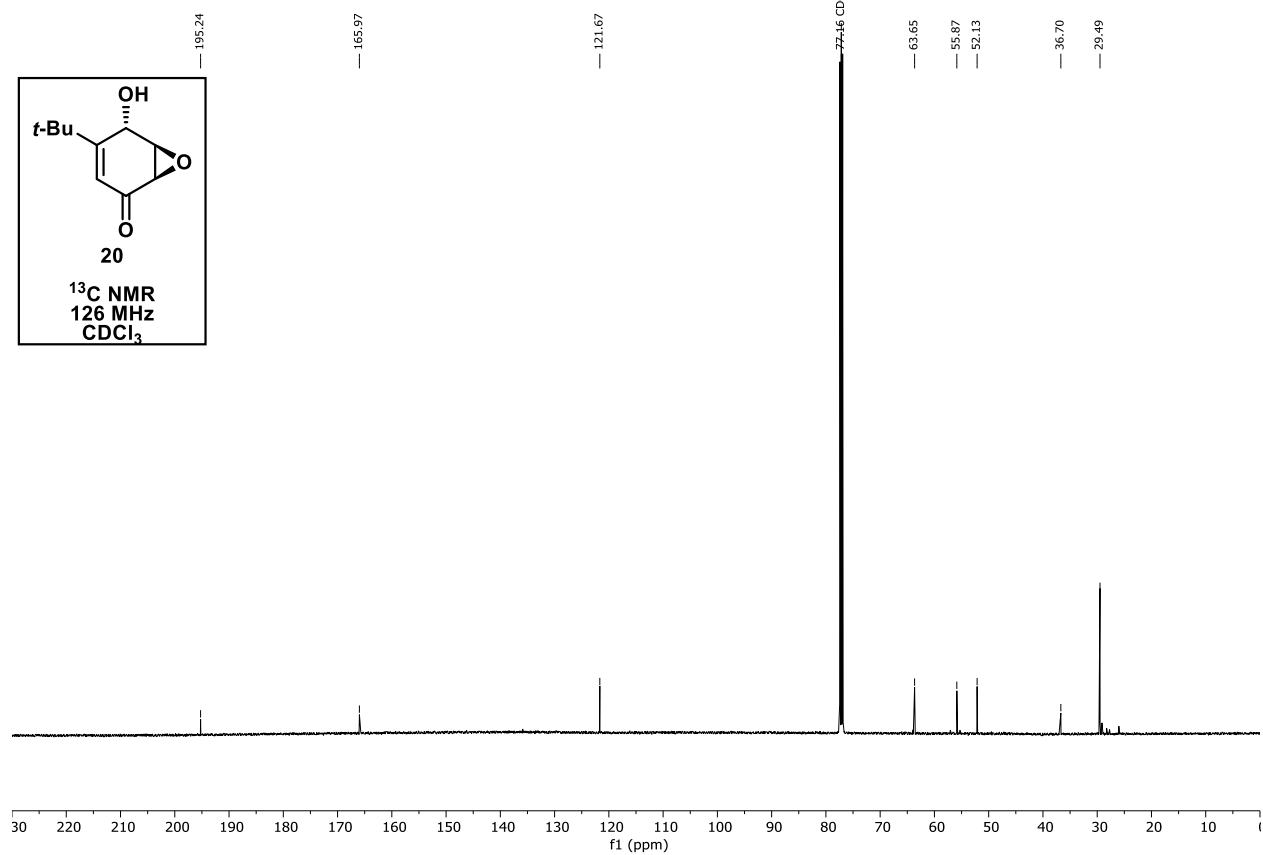



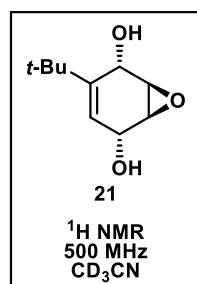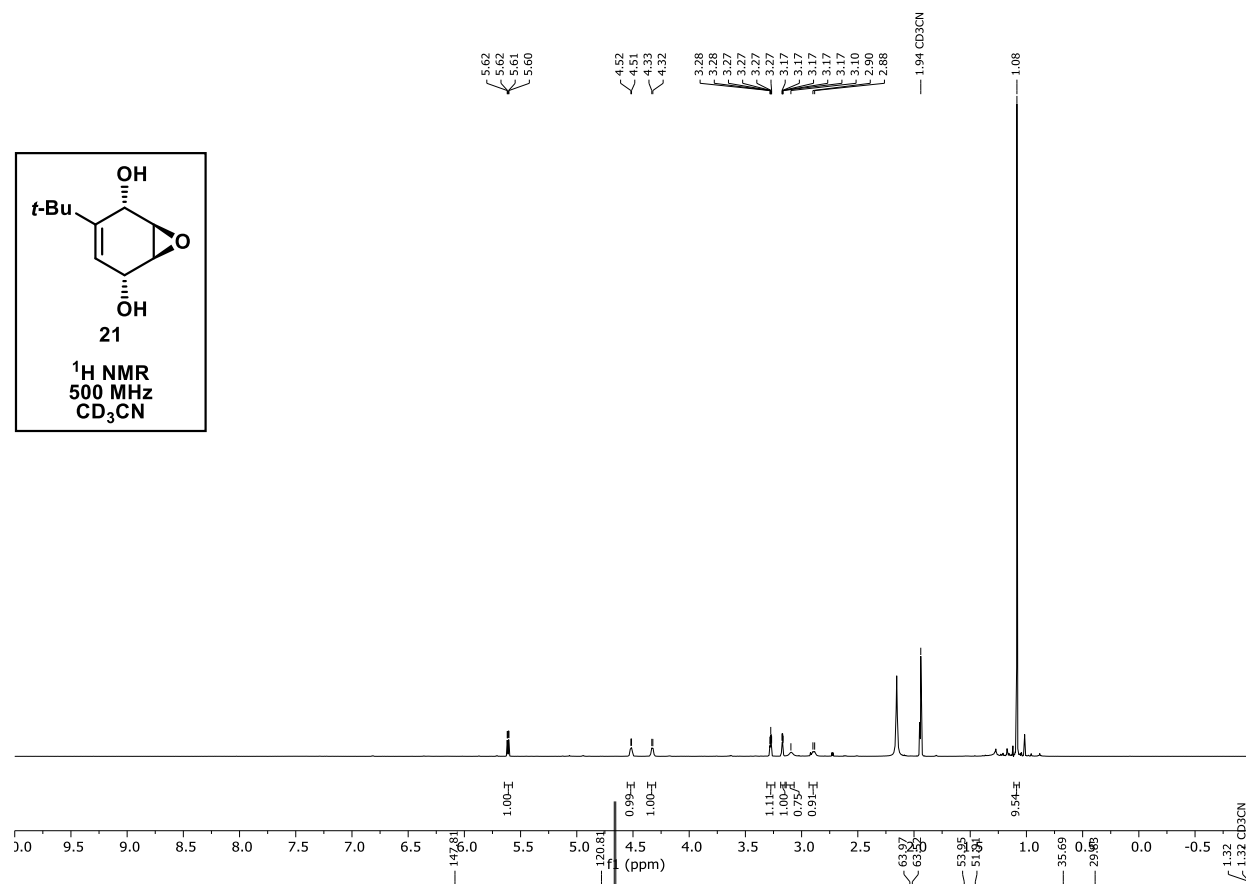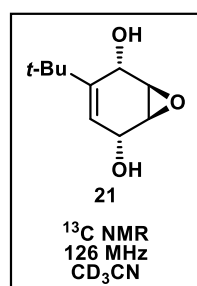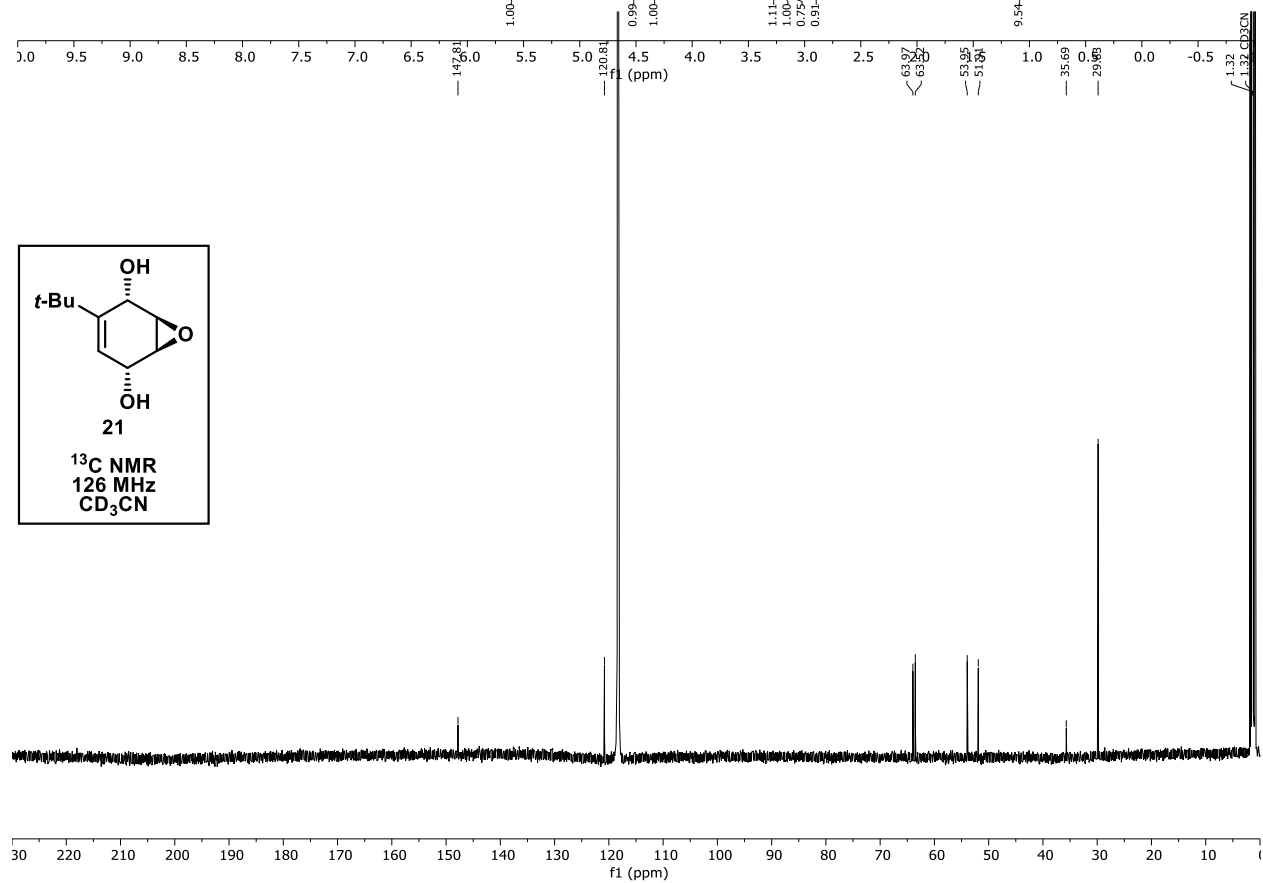

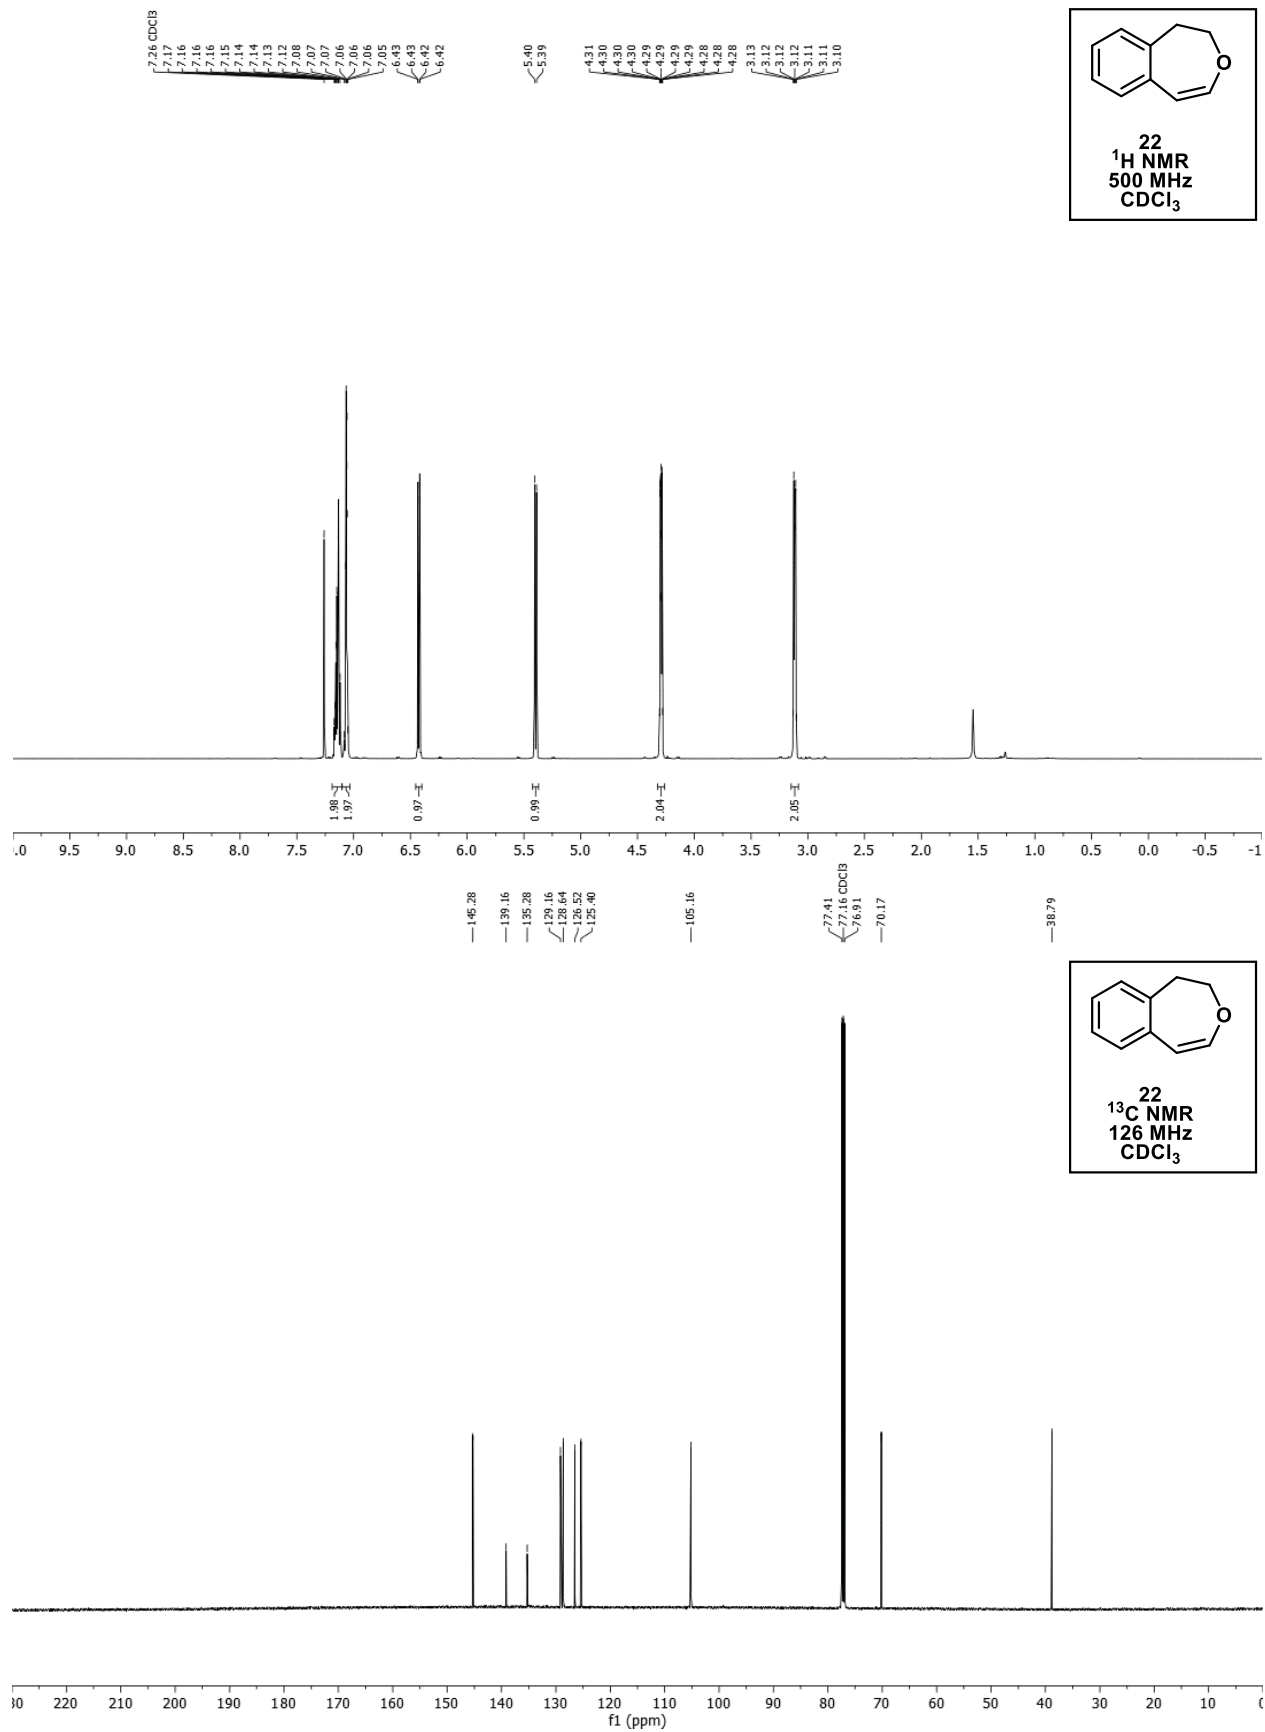

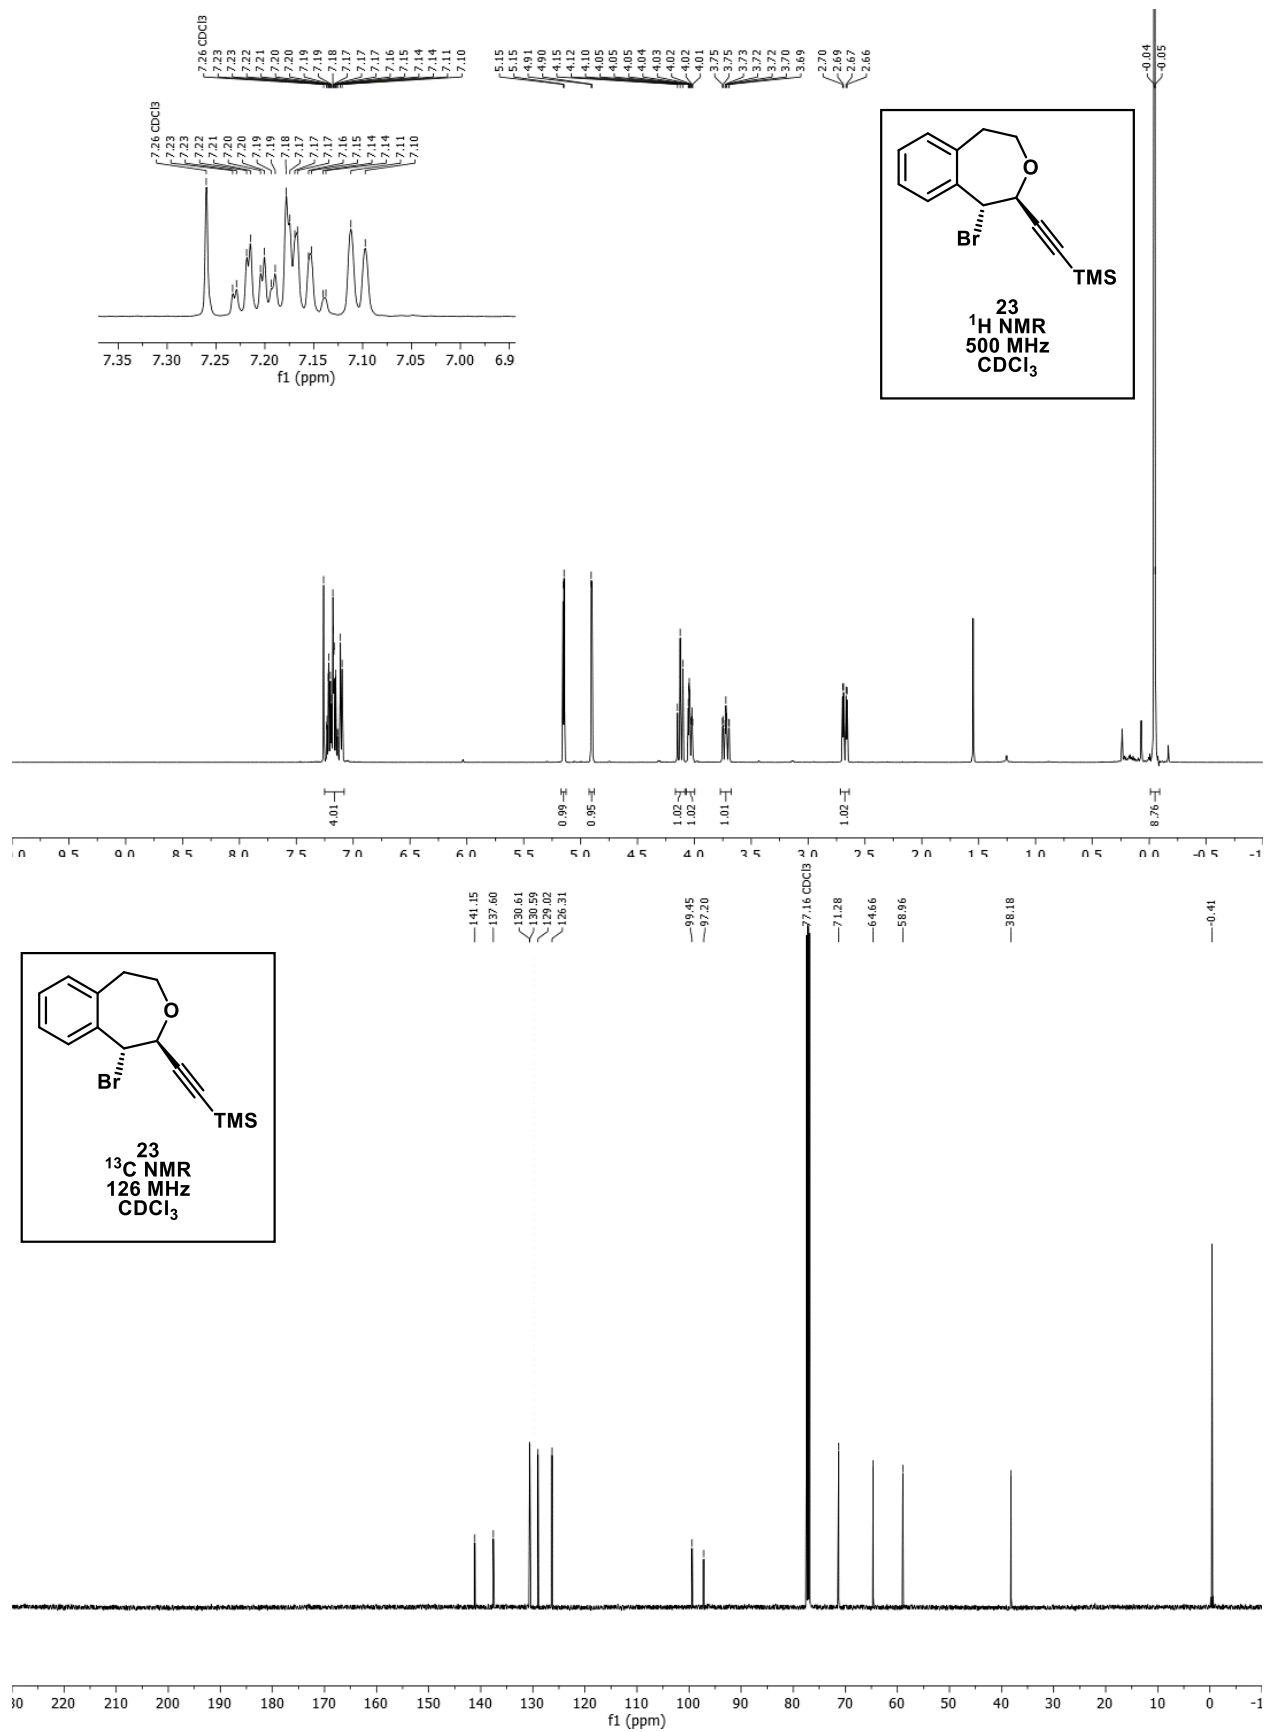

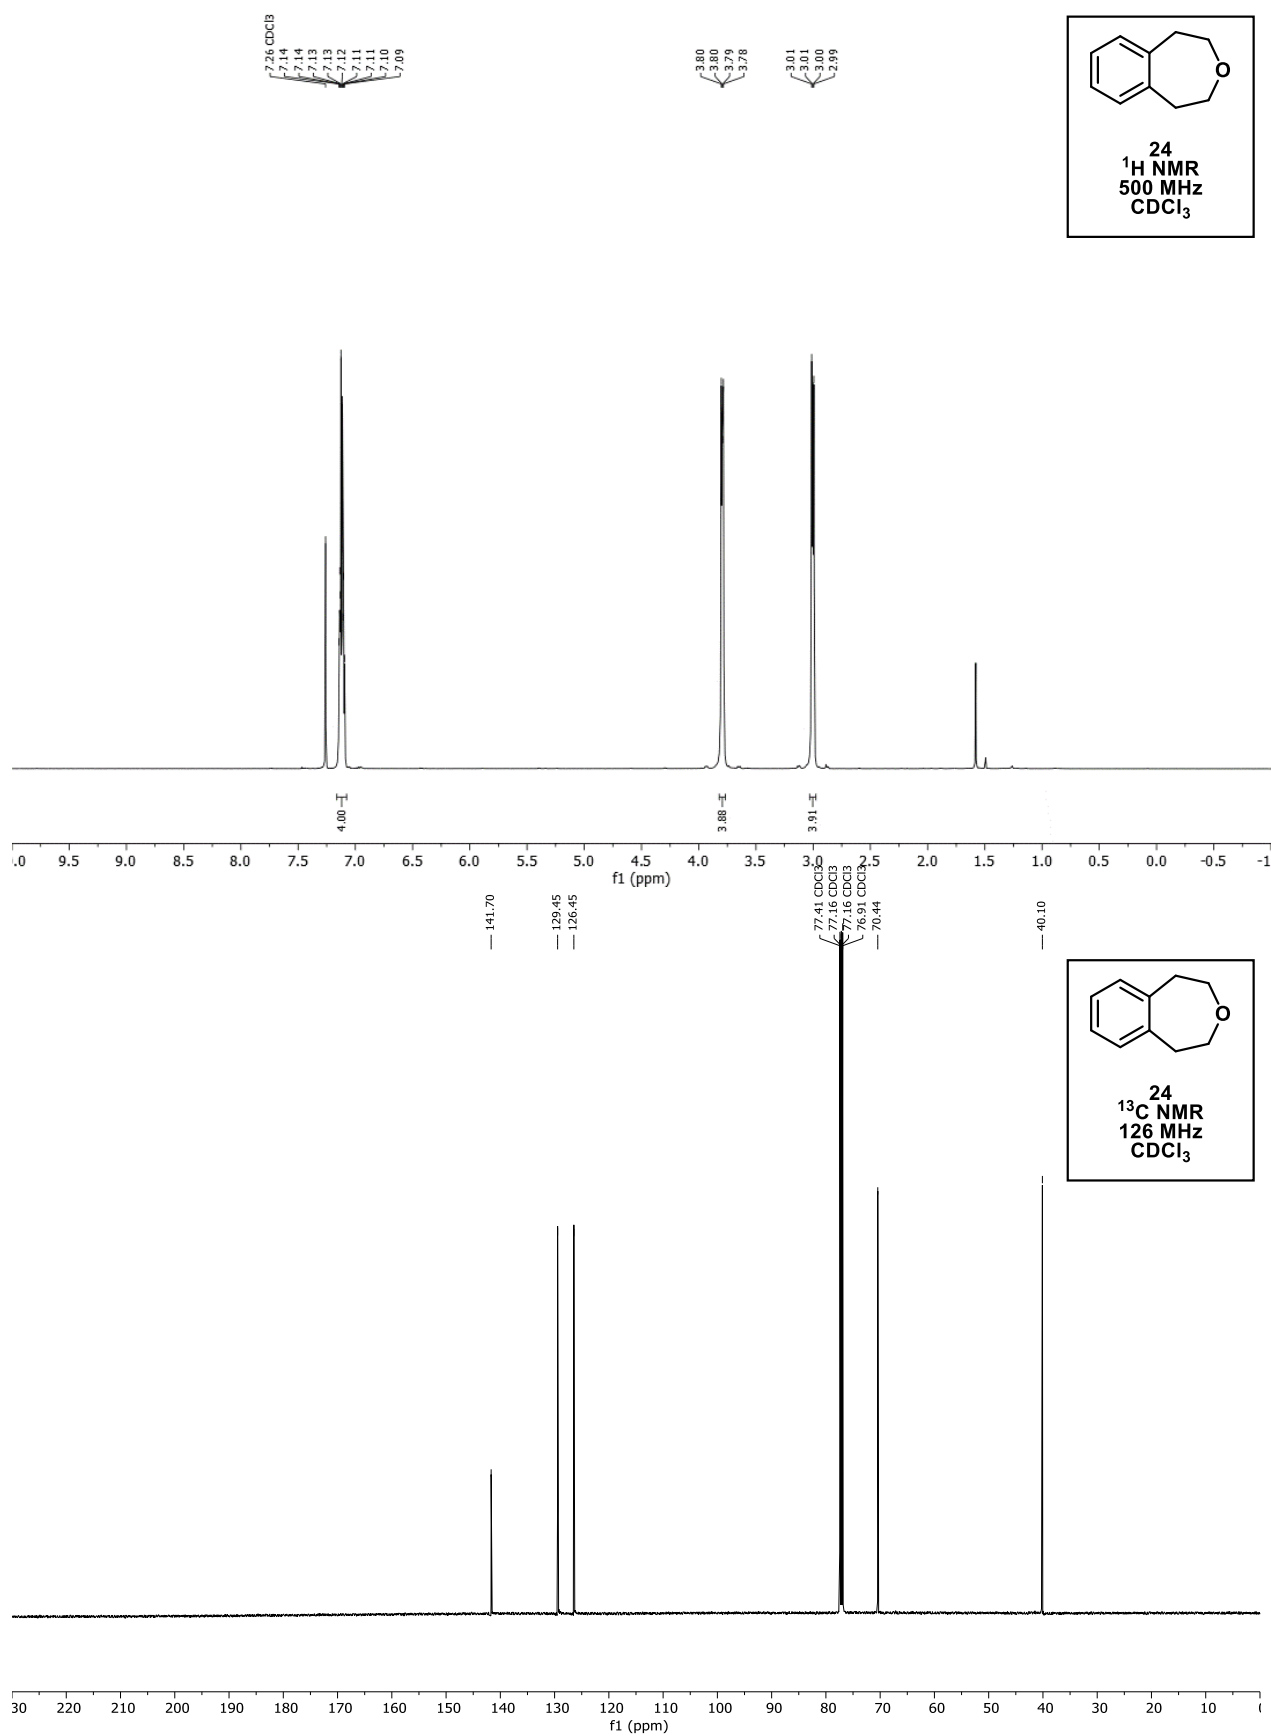

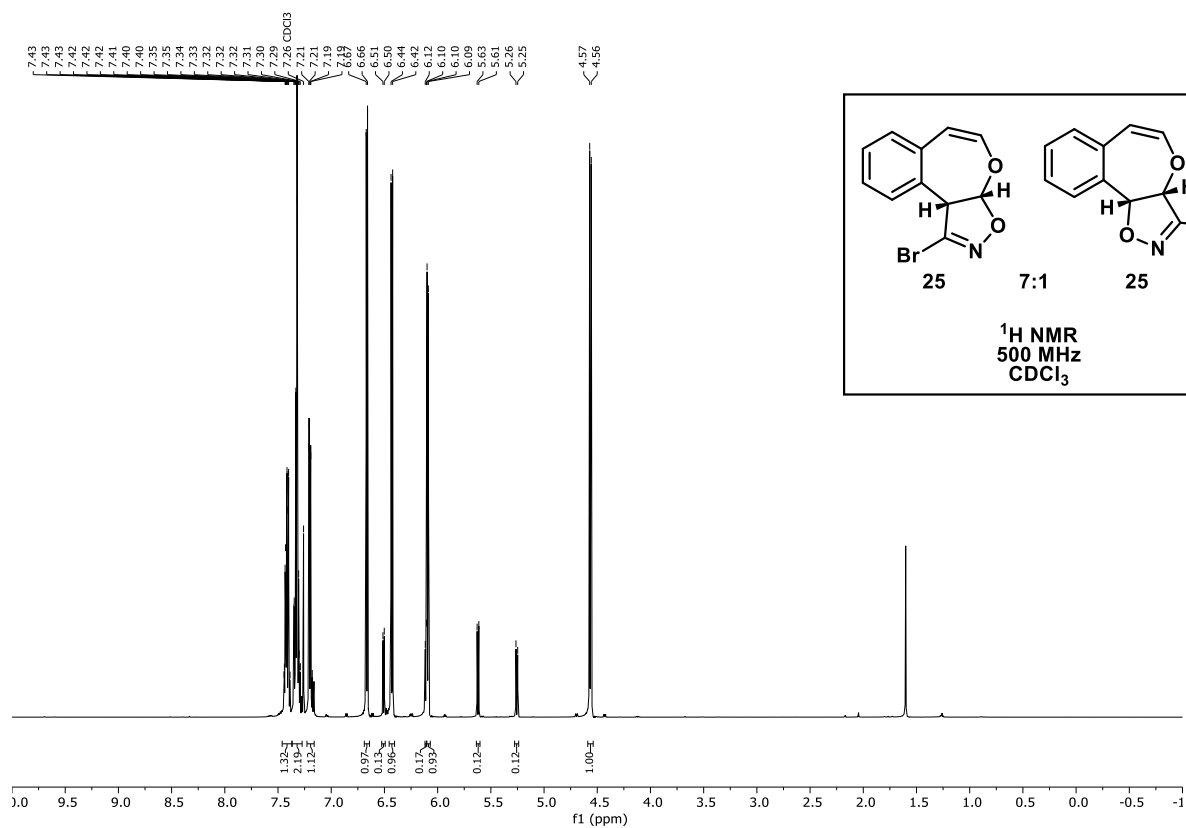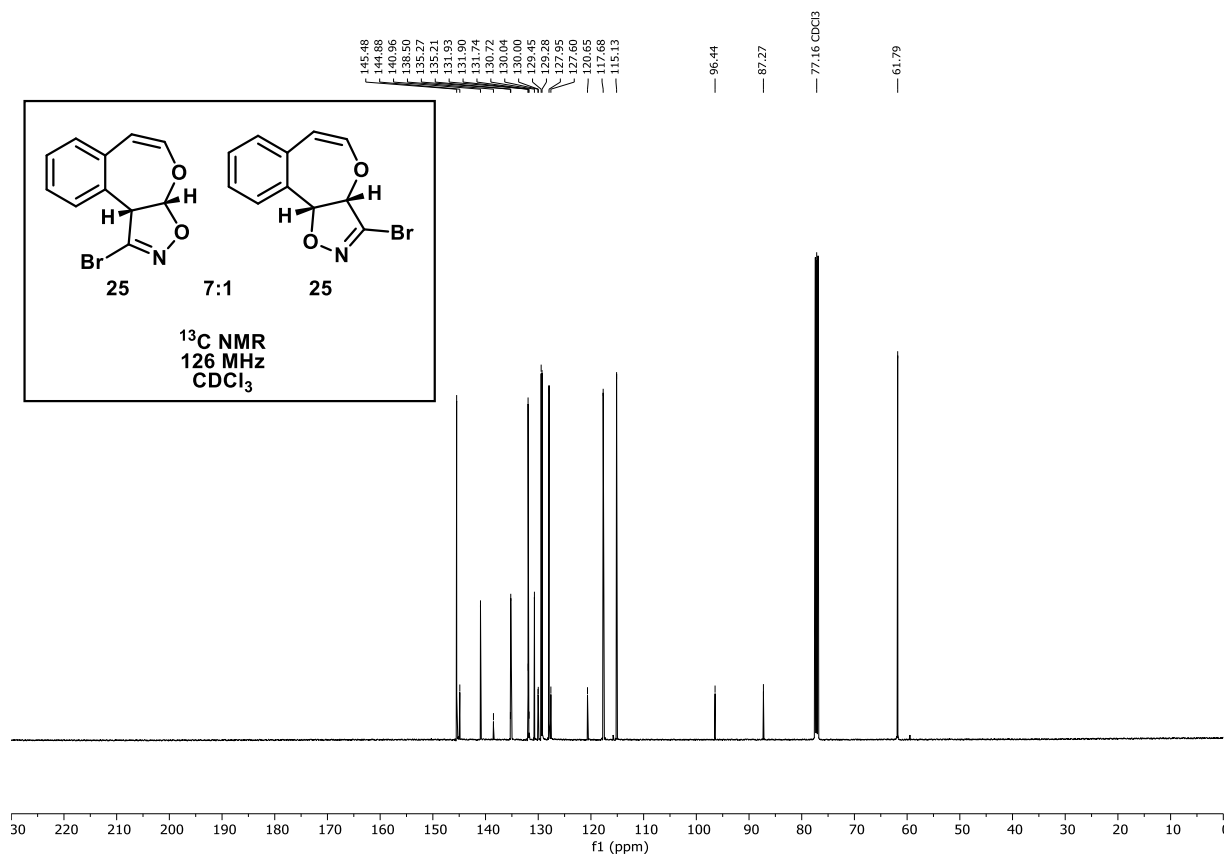

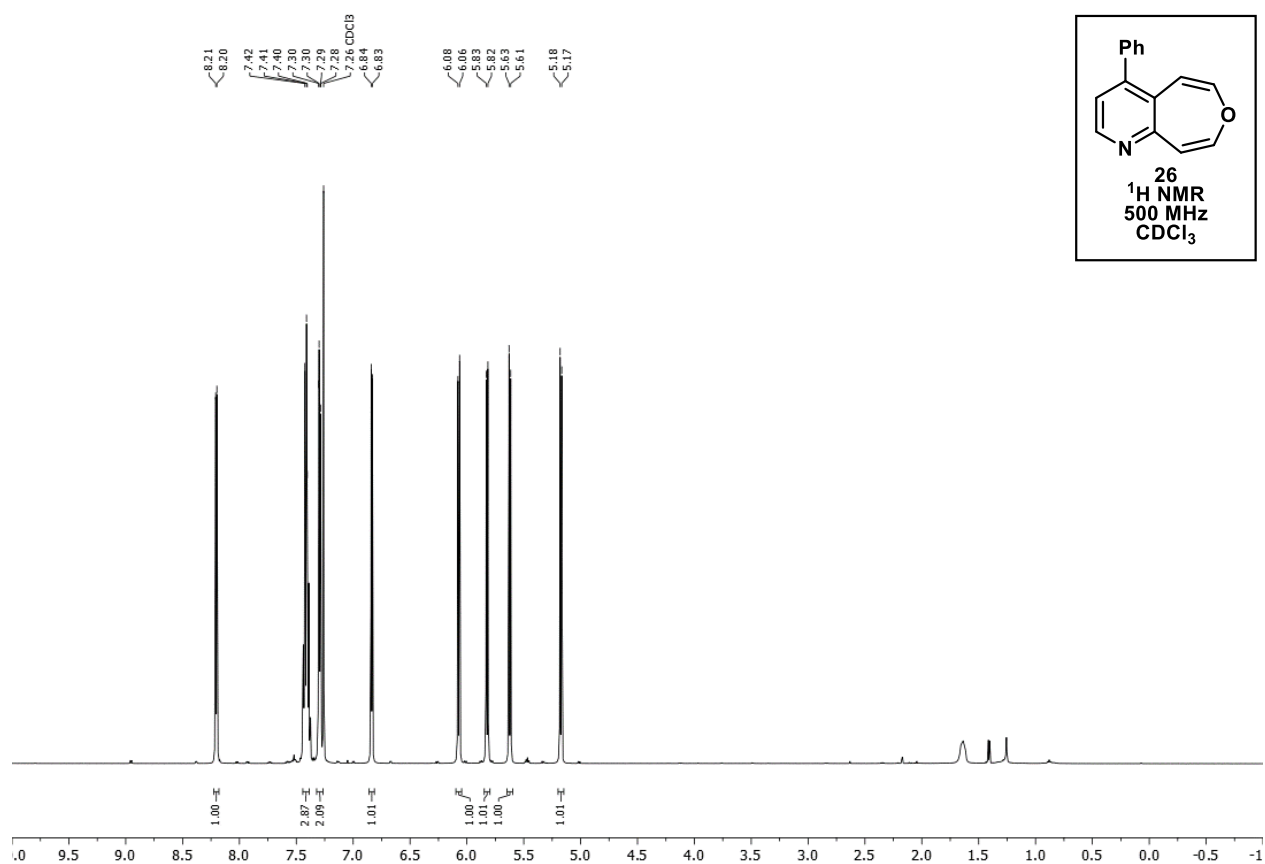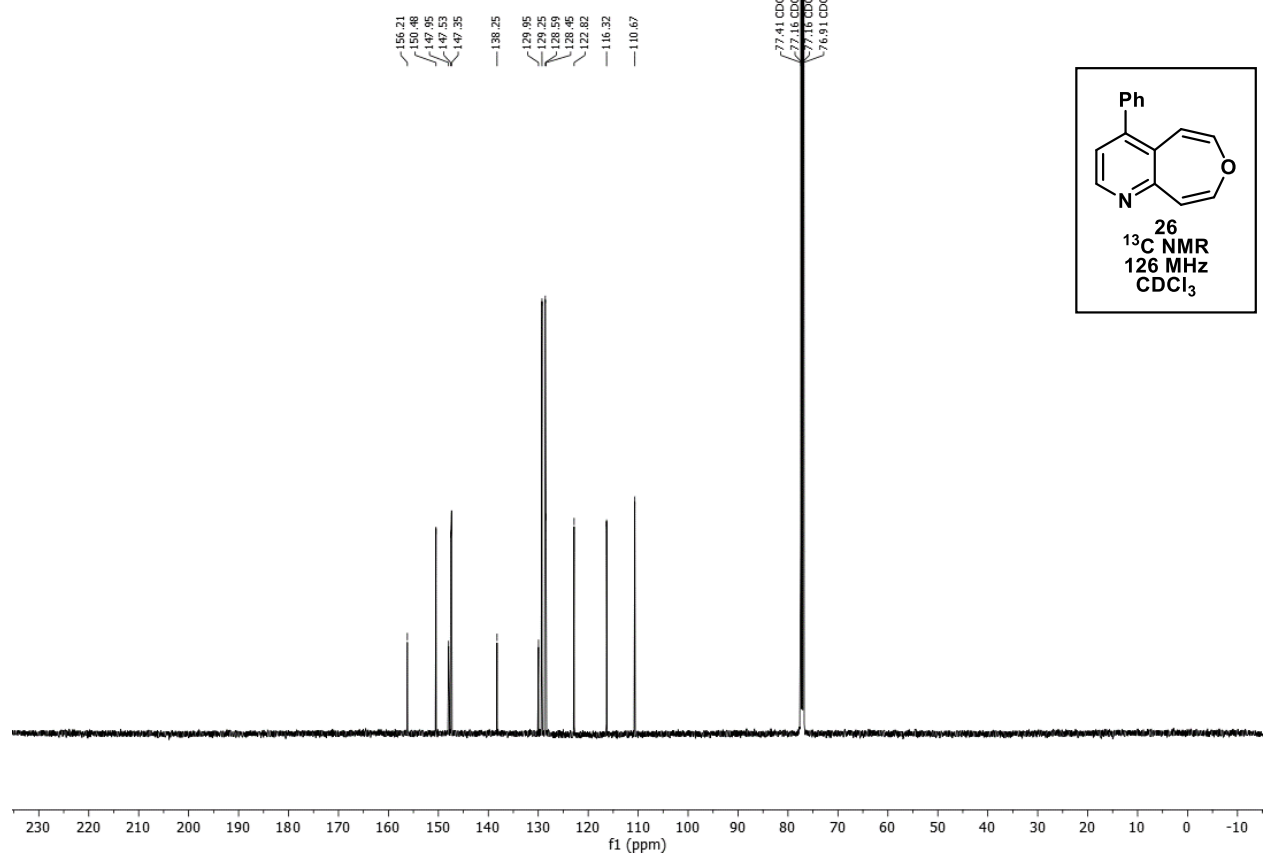

Supplement: Supplementary file 1 [file 22616261]
